# Supplementary material for: Identifying Age-Related Protein Mechanisms of Alzheimer's Disease Amyloidosis from Cerebrospinal Fluid Proteomics Using a Novel Machine Learning Approach
Source: Research Square preprint supplement (doi:10.21203/rs.3.rs-8791371/v1), 2026-02-24
Supplement: Supplementary file 1 [file 2baec2a838064feb911741dd.xlsx]

## Sheet: Table_1
Analytes	Protein Full Name	Protein	EntrezGeneSymbol	Model_81_Weight	0.7 Cor Model Weight	Knight ADRC-APOE4-AUC-ROC	ADNI-APOE4-AUC-ROC	Knight_Predicted_ADNI_APOE4_AUC-ROC	APOE4_Copy_Num_Corr	APOE4_Copy_Num_Corr Pval	APOE_ANOVA-Pvalue	CSF AB42:40 Correlation	CSF AB42:40 Pvalue	Age Cor Amyloidosis	Age Cor Amyloidosis Pval	Age Cor Non-amyloidosis	Age Cor Non-amyloidosis Pval
X22782_80	Kinetochore protein Spc25	SPC25	SPC25	0	-0.0231585	1	0.996437	0.995923	0.846333	9.72082e-235	3.56052e-273	-0.400573	6.01e-34	-0.24123	3.04e-06	-0.18719	8.25868e-05
X11293_14	Leucine-rich repeat neuronal protein 1:Cytoplasmic domain	LRRN1:CD	LRRN1	0	-0.0231585	0.993551	0.991932	0.986355	0.834808	1.53747e-222	1.94516e-219	-0.420116	1.67e-37	-0.222777	1.7e-05	-0.170767	0.000335834
X7223_60	Protein S100-A13	S100A13	S100A13	0	0	0.984166	0.983239	0.945354	-0.826331	3.73854e-214	6.519e-204	0.244716	5.3e-13	0.302507	3.5e-09	0.311082	2.92848e-11
X14068_29	C-C motif chemokine 25	TECK	CCL25	0	0	0.995171	0.9886	0.926963	0.841775	8.49048e-230	7.03384e-294	-0.358976	3.95e-27	-0.240768	3.18e-06	-0.18158	0.000135224
X20387_277	Coiled-coil-helix-coiled-coil-helix domain-containing protein 7	CHCH7	CHCHD7	0	0	0.982393	0.977022	0.924569	0.822738	9.80193e-211	1.07535e-238	-0.313471	9.58e-21	-0.28358	3.38e-08	-0.358841	1.00059e-14
X12501_10	Tubulin-specific chaperone A	TBCA	TBCA	0	0	0.898103	0.935321	0.881543	-0.695746	2.80362e-124	4.00021e-134	0.217108	1.75e-10	0.298626	5.64e-09	0.334619	6.81384e-13
X13574_50	Rho-related GTP-binding protein Rho6	RND1	RND1	0	-0.0231585	0.932126	0.927972	0.870393	0.726218	1.7316e-140	5.57674e-144	-0.37904	2.7e-30	-0.189005	0.000276537	-0.0809858	0.0908558
X21157_6	Hydroxylysine kinase	HYKK	HYKK	0	0	0.931125	0.931688	0.865069	-0.740978	3.73523e-149	1.24329e-144	0.298182	7.82e-19	0.198984	0.00012703	0.288274	8.2633e-10
X21206_218	HCLS1-associated protein X-1	HAX1	HAX1	-0.0231585	0	0.963964	0.940388	0.863319	0.784918	6.86176e-179	1.28156e-171	-0.441496	1.14e-41	-0.155634	0.00283133	-0.0723497	0.131022
X21916_82	Ubiquitin thioesterase otulin	OTUL	OTULIN	0	-0.0231585	0.977171	0.936185	0.860415	0.810151	2.40332e-199	2.15845e-224	-0.39965	8.73e-34	-0.184909	0.00037636	-0.0898309	0.0606154
X25108_6	Arginyl-tRNA--protein transferase 1	ATE1	ATE1	0	0	0.9464	0.932458	0.839604	-0.768906	2.72622e-167	3.14562e-135	0.248909	2.06e-13	0.248986	1.41e-06	0.345145	1.13832e-13
X5494_52	Small nuclear ribonucleoprotein F	RUXF	SNRPF	0	0	0.921013	0.913992	0.837177	-0.724953	9.00403e-140	5.77781e-104	0.185688	5.32e-08	0.278654	5.94e-08	0.344885	1.19057e-13
X22055_31	Forkhead box protein O1A	FOXO1A	FOXO1	0	0	0.916723	0.894521	0.831108	-0.721092	1.30699e-137	3.20419e-133	0.219831	1.02e-10	0.273683	1.04e-07	0.332468	9.73946e-13
X12881_17	Retinol dehydrogenase 16	RDH16	RDH16	0	0	0.945767	0.909048	0.829627	-0.764937	1.46653e-164	3.59881e-163	0.263967	5.94e-15	0.259432	4.84e-07	0.321555	5.72068e-12
X23284_5	LIM domain only transcription factor protein 4	LMO4	LMO4	0	0	0.931238	0.908467	0.829183	-0.74176	1.2487e-149	2.90331e-116	0.212916	3.96e-10	0.289158	1.76e-08	0.358399	1.08426e-14
X24493_10	Myotubularin-related protein 7	MTMR7	MTMR7	0	0	0.913497	0.898032	0.80854	-0.71108	3.58906e-132	3.44697e-131	0.207392	1.13e-09	0.243114	2.53e-06	0.35307	2.82813e-14
X13732_79	Cardiotrophin-1	Cardiotrophin-1	CTF1	0	-0.0231585	0.860048	0.86505	0.804698	0.604693	4.40102e-86	2.9552e-90	-0.430974	1.39e-39	-0.107706	0.0394478	0.135545	0.00453252
X21940_12	Protein Wnt-10b	WN10B	WNT10B	0	0	0.916214	0.887485	0.791355	-0.709023	4.40518e-131	1.89382e-101	0.192018	1.81e-08	0.214501	3.51e-05	0.258961	3.97604e-08
X23285_51	BTB/POZ domain-containing protein KCTD2	KCTD2	KCTD2	0	0	0.901838	0.85982	0.783771	-0.68443	9.10263e-119	7.8002e-108	0.183537	7.61e-08	0.215258	3.28e-05	0.270629	8.98797e-09
X11320_29	E3 ubiquitin-protein ligase CHFR	CHFR	CHFR	0	0	0.868956	0.862742	0.7829	0.635395	1.57576e-97	7.76031e-96	-0.187738	3.77e-08	-0.30673	2.06e-09	-0.352557	3.09825e-14
X7104_71	Calcium-binding protein 7	CABP7	CABP7	0	0	0.829876	0.859499	0.780264	-0.555534	3.72709e-70	2.62555e-77	0.171553	5.18e-07	0.179653	0.000553681	0.219593	3.58606e-06
X20133_1	Melanoma-associated antigen 3	MAGE-3	MAGEA3	0	0	0.867622	0.863844	0.777308	-0.640965	9.54381e-100	1.36261e-119	0.144042	2.61e-05	0.271577	1.31e-07	0.275926	4.46839e-09
X25488_6	Pleckstrin homology domain-containing family O member 2	PKHO2	PLEKHO2	0	-0.0231585	0.875445	0.870188	0.77653	0.641745	4.63201e-100	6.62199e-106	-0.429739	2.42e-39	-0.148346	0.00445399	-0.00891987	0.852495
X12587_65	ADP-ribosylation factor-like protein 2	ARL2	ARL2	0	0	0.854215	0.860531	0.77437	-0.625006	1.63762e-93	3.46592e-105	0.121993	0.000376045	0.284192	3.15e-08	0.258863	4.02452e-08
X13022_20	Tumor protein p53-inducible protein 11	P5I11	TP53I11	0	0	0.89534	0.853788	0.766787	-0.681293	2.77422e-117	2.77008e-71	0.158239	3.75e-06	0.276267	7.78e-08	0.342653	1.74933e-13
X6378_2	Protein CEI	CEI	C5orf38	0	-0.0231585	0.761539	0.83931	0.766158	0.449833	1.12816e-43	3.1328e-54	-0.361761	1.48e-27	-0.121844	0.0197147	-0.0137162	0.774936
X9999_1	Interferon regulatory factor 6	IRF6	IRF6	0	0	0.852856	0.831347	0.756448	-0.607611	4.06657e-87	2.09414e-78	0.116353	0.000696992	0.285845	2.6e-08	0.363399	4.33885e-15
X7965_25	Hemoglobin subunit theta-1	HBAT	HBQ1	0	0	0.867356	0.815092	0.755033	-0.637834	1.70583e-98	7.68681e-81	0.134386	8.83e-05	0.261107	4.06e-07	0.289752	6.71321e-10
X24413_96	Peroxisomal coenzyme A diphosphatase NUDT7	NUDT7	NUDT7	0	0	0.812011	0.828673	0.748764	-0.528386	1.93266e-62	2.36681e-57	0.0841284	0.0143777	0.255916	6.97e-07	0.268743	1.1486e-08
X4959_2	Anterior gradient protein 2 homolog	AGR2	AGR2	0	0	0.854438	0.837836	0.740108	0.606724	8.40497e-87	9.83212e-90	-0.35186	4.64e-26	-0.207861	6.15e-05	-0.0812569	0.0897762
X10085_25	Steroidogenic acute regulatory protein, mitochondrial	STAR	STAR	0	-0.0231585	0.761475	0.775889	0.731929	0.446574	5.37431e-43	1.05912e-63	-0.402576	2.66e-34	-0.0762765	0.145286	0.0975446	0.0415352
X14318_1	Vacuolar protein sorting-associated protein 29	VPS29	VPS29	0	0	0.884289	0.828212	0.73044	-0.662764	6.91721e-109	4.03597e-96	0.181717	1.03e-07	0.284876	2.91e-08	0.362013	5.6023e-15
X25482_5	Nuclear factor 1 A-type	NFIA	NFIA	0	0	0.832162	0.856476	0.730253	0.572171	3.02506e-75	3.96126e-72	-0.201156	3.58e-09	-0.212034	4.33e-05	-0.144497	0.00246262
X19332_1	MOB-like protein phocein	MOBL3	MOB4	0	0	0.844226	0.804027	0.727007	-0.592117	9.56654e-82	4.78886e-74	0.112345	0.00106334	0.255787	7.07e-07	0.359582	8.74433e-15
X11286_78	Selenoprotein S	SELS	SELENOS	0	0	0.850209	0.772959	0.719323	-0.61116	2.17136e-88	6.6863e-59	0.13266	0.000108843	0.254349	8.2e-07	0.287566	9.12308e-10
X8760_10	DCN1-like protein 5	DCNL5	DCUN1D5	0	0	0.841616	0.809649	0.7178	-0.595342	7.70309e-83	7.42871e-65	0.148999	1.35e-05	0.242	2.82e-06	0.321719	5.57335e-12
X11391_69	Mevalonate kinase	MVK	MVK	0	0	0.796476	0.780465	0.709252	-0.507167	7.02315e-57	9.86694e-50	0.197184	7.31e-09	0.046673	0.373284	0.00670357	0.888869
X11179_7	Testis-specific serine/threonine-protein kinase 1	TSSK1	TSSK1B	0	0	0.769414	0.766668	0.707771	0.464619	7.63526e-47	7.98455e-42	-0.0455264	0.185865	-0.345739	1.03e-11	-0.403613	1.49684e-18
X11636_33	Transgelin-2	Transgelin-2	TAGLN2	0	0	0.756951	0.773179	0.703694	0.430813	8.06538e-40	4.06894e-37	-0.292223	4.06e-18	-0.0768872	0.142082	0.0539882	0.260086
X3825_18	Mitogen-activated protein kinase 8	MK08	MAPK8	0	0	0.710514	0.801019	0.697573	0.353313	1.88244e-26	4.85956e-46	-0.275561	3.3e-16	-0.110312	0.0348912	0.0283466	0.554524
X23356_32	Coiled-coil domain-containing protein 24	CCD24	CCDC24	0	0	0.768801	0.781001	0.69729	-0.478779	4.99547e-50	3.29456e-41	0.113196	0.000973169	0.262737	3.41e-07	0.29654	2.54735e-10
X21392_15	Melanoma-associated antigen D1	MAGD1	MAGED1	0	0	0.726883	0.741143	0.692938	-0.394937	3.45789e-33	1.41562e-32	0.125574	0.0002507	0.123774	0.0178387	0.155856	0.00108021
X21876_266	PRKCA-binding protein	PICK1	PICK1	0	0	0.757518	0.749754	0.691993	-0.465643	4.54516e-47	1.04568e-89	0.158661	3.53e-06	0.225848	1.29e-05	0.318846	8.78157e-12
X17405_2	Ubiquitin carboxyl-terminal hydrolase isozyme L5	UCHL5	UCHL5	0	0	0.757092	0.750421	0.691088	-0.442986	2.93803e-42	8.27189e-55	0.0956819	0.00534798	0.170165	0.0010824	0.212694	7.29289e-06
X21167_33	Phosphatidylglycerophosphatase and protein-tyrosine phosphatase 1	PTPM1	PTPMT1	0	0	0.75104	0.783726	0.689413	-0.432347	4.02565e-40	1.95519e-49	0.0184144	0.592749	0.192829	0.000206189	0.23735	5.18346e-07
X21754_5	Ubiquitin thioesterase ZRANB1	ZRAN1	ZRANB1	0	0	0.727352	0.751143	0.688895	-0.387322	7.00127e-32	6.84105e-27	0.0434291	0.206981	0.207365	6.41e-05	0.18691	8.46718e-05
X7758_217	RING finger protein 215:Extracellular domain	RN215:ECD	RNF215	0	0	0.832358	0.801652	0.688486	0.562772	2.46801e-72	1.00296e-70	-0.332462	2.79e-23	-0.0428709	0.413506	-0.0931982	0.0515437
X13377_3	Cytochrome b561 domain-containing protein 1	C56D1	CYB561D1	0	0	0.771509	0.723574	0.68604	-0.467654	1.63264e-47	2.32039e-60	0.159716	3.03e-06	0.147287	0.00474964	0.113781	0.0173382
X10624_45	Serine protease inhibitor Kazal-type 13	ISK13	SPINK13	0	0	0.737558	0.746981	0.681863	0.404317	7.61982e-35	1.71627e-33	-0.176282	2.47e-07	-0.149349	0.00418961	0.051697	0.280887
X9207_60	Quinone oxidoreductase-like protein 1	QORL1	CRYZL1	0	0	0.844506	0.768723	0.681211	-0.589103	9.82098e-81	7.16312e-59	0.18504	5.93e-08	0.221453	1.91e-05	0.189792	6.53837e-05
X12572_236	Embryonal Fyn-associated substrate	EFS	EFS	0	0	0.768456	0.769866	0.679618	-0.450649	7.61091e-44	1.62133e-50	0.225071	3.55e-11	0.068215	0.192888	0.0142828	0.765904
X5694_57	SPARC-related modular calcium-binding protein 1	SMOC1	SMOC1	-0.0643914	0	0.615925	0.722234	0.675962	0.2002	3.75023e-09	1.28852e-07	-0.530553	1.34e-62	0.0377662	0.471343	0.0496392	0.300505
X20965_18	Microtubule-associated proteins 1A/1B light chain 3 beta 2	MP3B2	MAP1LC3B2	0	0	0.793522	0.761329	0.673382	-0.506185	1.24282e-56	2.13577e-51	0.0285166	0.407456	0.266274	2.34e-07	0.381057	1.49916e-16
X23414_12	Zinc finger protein 483	ZN483	ZNF483	0	0	0.782699	0.738087	0.670176	-0.493107	2.09228e-53	1.55886e-44	0.0836888	0.0148978	0.289919	1.61e-08	0.364778	3.36112e-15
X14341_8	Protein FAM69C	FA69C	DIPK1C	0	0	0.770079	0.723277	0.66528	-0.461819	3.12683e-46	1.31871e-46	0.0824326	0.0164769	0.224988	1.39e-05	0.303522	9.15246e-11
X5020_50	Phosphoglycerate kinase 1	phosphoglycerate kinase 1	PGK1	0	0	0.723032	0.726337	0.663657	0.382401	4.69255e-31	1.18045e-26	-0.265846	3.75e-15	-0.0534926	0.307442	0.0952048	0.0466977
X11160_56	RING finger protein 122	RN122	RNF122	0	0	0.600346	0.720112	0.662727	0.166048	1.09622e-06	1.19122e-15	-0.213975	3.23e-10	-0.0792873	0.130013	-0.00408294	0.932176
X12754_14	Cold shock domain-containing protein C2	CSDC2	CSDC2	0	0	0.661312	0.715269	0.662384	0.284603	2.43516e-17	1.8309e-30	-0.10212	0.00294271	-0.283681	3.34e-08	-0.278696	3.08207e-09
X23374_42	N-terminal EF-hand calcium-binding protein 3	NECA3	NECAB3	0	0	0.722514	0.716654	0.662183	-0.379397	1.47553e-30	4.59541e-26	0.0765062	0.0260653	0.132005	0.0114767	0.160809	0.000740832
X8785_1	Armadillo repeat-containing protein 5:Armadillo Repeat Domain 5	ARMC5:ARM 5	ARMC5	0	0	0.726923	0.703046	0.657939	0.399051	6.58658e-34	2.99631e-33	-0.210324	6.5e-10	-0.0858956	0.100861	-0.163096	0.000620176
X5858_6	14-3-3 protein zeta/delta	14-3-3 protein zeta/delta	YWHAZ	0	-0.0643914	0.571557	0.68515	0.657604	0.127978	0.000180054	0.00367903	-0.478567	1.22e-49	0.15191	0.00357748	0.428434	6.17046e-21
X21238_40	CDK5 regulatory subunit-associated protein 3	CK5P3	CDK5RAP3	0	0	0.735739	0.732163	0.654205	-0.397042	1.48472e-33	4.49982e-36	0.070546	0.0402252	0.152176	0.00351895	0.265888	1.6588e-08
X7752_31	C-type lectin domain family 4 member D	CLC4D	CLEC4D	0	0	0.709944	0.730704	0.654022	0.363243	5.70237e-28	9.89589e-34	-0.25224	9.58e-14	-0.142202	0.00642936	-0.049153	0.30527
X13118_5	SPARC-related modular calcium-binding protein 1	SMOC1	SMOC1	-0.035346	0	0.60446	0.716393	0.653896	0.181215	1.00471e-07	4.95531e-06	-0.506126	3.14e-56	-0.0101856	0.846019	0.0153044	0.7497
X15606_19	Keratin, type I cytoskeletal 19	Keratin 19	KRT19	0	0	0.831143	0.778361	0.653576	-0.564069	9.90754e-73	6.56931e-59	0.115423	0.000769649	0.174601	0.000794552	0.263385	2.28162e-08
X12627_97	Ubiquitin-like modifier-activating enzyme ATG7	ATG7	ATG7	0	0	0.822244	0.771668	0.652805	-0.565271	4.23966e-73	3.29333e-94	0.250804	1.33e-13	0.138675	0.00788919	0.0851909	0.0752378
X12414_31	14-3-3 protein beta/alpha	14-3-3 protein beta/alpha	YWHAB	0	-0.0643914	0.567915	0.683556	0.652313	0.117801	0.000570107	0.00608543	-0.48152	2.57e-50	0.178638	0.000595801	0.409106	4.61716e-19
X4179_57	14-3-3 protein gamma	14-3-3 protein gamma	YWHAG	0	-0.0643914	0.583291	0.703072	0.651327	0.14622	1.82904e-05	0.00016251	-0.522855	1.55e-60	0.205044	7.77e-05	0.484879	3.77328e-27
X12392_30	ADP-ribosylation factor-like protein 1	ARL1	ARL1	0	0	0.769836	0.715503	0.65104	-0.463332	1.46191e-46	1.8592e-67	0.0782666	0.0228104	0.264757	2.75e-07	0.383848	8.64058e-17
X9039_47	Torsin-1A-interacting protein 1:Nuclear domain	TOIP1:Nuclear	TOR1AIP1	0	0	0.68848	0.674606	0.649324	-0.31244	9.51819e-21	1.21443e-16	0.0980294	0.0043179	0.198432	0.00013274	0.109073	0.0225836
X22858_3	Mitogen-activated protein kinase 6	MK06	MAPK6	0	0	0.708599	0.715887	0.645467	-0.361996	8.90753e-28	9.57012e-24	0.0875925	0.0108077	0.324422	2.04e-10	0.303712	8.89747e-11
X23253_5	Catechol O-methyltransferase domain-containing protein 1	CMTD1	COMTD1	0	0	0.708995	0.724501	0.643229	-0.360161	1.71046e-27	2.66749e-24	-0.00889814	0.796072	0.23744	4.37e-06	0.321729	5.56473e-12
X24497_8	Probable E3 ubiquitin-protein ligase TRIML1	TRIML	TRIML1	0	0	0.637351	0.688638	0.642939	-0.241517	8.97684e-13	3.79375e-10	0.226729	2.52e-11	0.0835563	0.110522	-0.131651	0.00584713
X20398_60	Ribonuclease P protein subunit p20	POP7	POP7	0	0	0.75196	0.688355	0.642451	-0.432888	3.14746e-40	2.22089e-32	0.0880556	0.0103956	0.213684	3.76e-05	0.267533	1.34297e-08
X21115_48	Pre-miRNA 5'-monophosphate methyltransferase	BN3D2	BCDIN3D	0	0	0.795475	0.70668	0.639633	-0.52364	3.66613e-61	5.29867e-69	0.0759932	0.0270862	0.209538	5.35e-05	0.212097	7.74639e-06
X22968_9	G antigen 2D	GGE2D	GAGE2D	0	-0.0643914	0.570247	0.673869	0.638963	0.127264	0.000195763	0.00898633	-0.355272	1.43e-26	-0.0012315	0.981268	0.057315	0.231815
X7180_114	Interferon alpha-14	IFN14	IFNA14	0	0	0.726892	0.705243	0.638341	0.384955	1.75554e-31	5.35164e-29	-0.158876	3.42e-06	-0.0402834	0.442283	-0.201039	2.29672e-05
X12650_43	Guanine nucleotide-binding protein G(k) subunit alpha	GNAI3	GNAI3	0	0	0.692056	0.679212	0.637429	-0.337571	3.74734e-24	1.33909e-40	0.0853921	0.0129702	0.100172	0.0555361	0.174312	0.000250708
X4903_72	Calcineurin	Calcineurin	PPP3CA|PPP3R1	0	-0.0643914	0.561417	0.677123	0.635203	0.108284	0.00154887	0.0227396	-0.406396	5.55e-35	0.039247	0.454123	0.179012	0.000168648
X25486_38	39S ribosomal protein L38, mitochondrial	RM38	MRPL38	0	0	0.637895	0.671647	0.634927	-0.222329	5.29691e-11	1.61124e-10	0.185848	5.18e-08	-0.081743	0.1185	-0.228597	1.37134e-06
X6510_56	E3 ubiquitin-protein ligase RNF128:region 1	RN128:region 1	RNF128	0	0	0.735096	0.685336	0.633997	-0.403069	1.27514e-34	1.45304e-36	0.0346948	0.313479	0.249101	1.4e-06	0.249202	1.30583e-07
X8273_84	Interleukin-31 receptor subunit alpha	IL31R	IL31RA	0	0	0.603821	0.667827	0.633889	-0.180392	1.14992e-07	1.41482e-07	0.0508212	0.139687	0.12606	0.0158198	-0.0431721	0.367946
X15545_13	Calcineurin subunit B type 1	Calcineurin B a	PPP3R1	0	-0.0643914	0.569217	0.665865	0.63301	0.123003	0.000319748	0.00518144	-0.394177	7.8e-33	-0.0630495	0.228868	0.0732599	0.126231
X22430_15	N-chimaerin	CHIN	CHN1	0	-0.0214538	0.566486	0.642835	0.631863	0.118873	0.000507007	0.00793789	-0.450682	1.49e-43	0.228047	1.05e-05	0.465026	7.85487e-25
X11258_41	Mucosal addressin cell adhesion molecule 1	MAdCAM-1	MADCAM1	0	0	0.651857	0.675057	0.631026	0.259608	1.37174e-14	4.74421e-13	-0.213207	3.74e-10	-0.00282545	0.957039	0.0231443	0.629451
X25288_16	Dimethylaniline monooxygenase [N-oxide-forming] 3	FMO3	FMO3	0	0	0.654186	0.679979	0.630073	-0.260449	1.12038e-14	1.28083e-14	-0.0567205	0.0992163	0.206172	7.08e-05	0.249006	1.33676e-07
X11214_40	DnaJ homolog subfamily B member 9	DNJB9	DNAJB9	0	-0.0643914	0.587058	0.688311	0.62957	0.164526	1.37747e-06	1.52629e-07	-0.346198	3.15e-25	-0.015878	0.762085	0.210173	9.39847e-06
X21861_8	Proteasome subunit beta type-10	PSB10	PSMB10	0	0	0.670474	0.663821	0.629536	-0.289658	6.23978e-18	3.81675e-32	-0.0848119	0.0136005	0.184111	0.000399338	0.25194	9.40044e-08
X16885_49	Microtubule-associated protein RP/EB family member 3	MARE3	MAPRE3	-0.0158848	0	0.565722	0.66037	0.628632	0.114001	0.00085736	0.00700584	-0.500425	8.12e-55	0.112461	0.0314787	0.366571	2.4067e-15
X9853_3	Interferon-induced protein with tetratricopeptide repeats 2	IFIT2	IFIT2	0	0	0.745103	0.693448	0.626364	-0.419446	1.24676e-37	7.8257e-31	0.138777	5.12e-05	0.229532	9.18e-06	0.180659	0.000146419
X14157_21	14-3-3 protein epsilon	14-3-3E	YWHAE	0	-0.0643914	0.572966	0.66037	0.625385	0.124873	0.00025829	0.00229908	-0.468206	2.6e-47	0.143795	0.00585335	0.353479	2.62922e-14
X9878_3	Estrogen sulfotransferase	SULT 1E	SULT1E1	0	0	0.645102	0.649558	0.625181	-0.295515	1.24425e-18	1.5617e-63	-0.0348837	0.310851	0.252311	1.01e-06	0.232406	9.02213e-07
X9874_28	Cyclin-dependent kinase 4 inhibitor B	p15-INK4b	CDKN2B	0	0	0.689334	0.68009	0.624447	-0.337383	3.98468e-24	8.08776e-38	0.0159311	0.643567	0.186157	0.000342869	0.273212	6.4048e-09
X20931_156	Methylglutaconyl-CoA hydratase, mitochondrial	AUHM	AUH	0	0	0.641986	0.651435	0.624414	-0.245665	3.54423e-13	2.17994e-11	-0.0266044	0.439634	0.225137	1.37e-05	0.29325	4.08765e-10
X15612_5	Protein lin-7 homolog B	LIN7B	LIN7B	0	-0.0158848	0.550924	0.669164	0.623583	0.0877337	0.0104058	0.0256159	-0.404075	1.44e-34	0.135464	0.00946801	0.300661	1.39699e-10
X20197_14	Visinin-like protein 1	VISL1	VSNL1	0	-0.0643914	0.542933	0.649376	0.622403	0.0762728	0.0259938	0.164987	-0.362223	1.26e-27	0.0392139	0.454504	0.161042	0.000727659
X19620_16	Disks large homolog 2	DLG2	DLG2	0	-0.0643914	0.549402	0.656867	0.621726	0.0872213	0.0108646	0.130447	-0.408613	2.21e-35	0.120568	0.0210471	0.299793	1.58655e-10
X8946_38	Bile acid receptor	NR1H4	NR1H4	0	0	0.752935	0.698389	0.621543	0.434771	1.33259e-40	1.30877e-44	-0.294199	2.36e-18	-0.122886	0.0186819	-0.0569139	0.235103
X11180_17	SWI/SNF complex subunit SMARCC1	SMRC1	SMARCC1	0.00579813	0	0.743431	0.697339	0.621543	-0.413121	1.89647e-36	3.05977e-43	0.173231	3.99e-07	0.212043	4.33e-05	0.197369	3.25233e-05
X13522_20	Visinin-like protein 1	VISL1	VSNL1	0	-0.0643914	0.547441	0.652529	0.621491	0.0832934	0.0150193	0.124664	-0.352936	3.21e-26	0.0513265	0.327471	0.167733	0.000429418
X8922_4	Transmembrane and coiled-coil domains protein 3:region 1	TMCC3:region 1	TMCC3	0	0	0.711761	0.663203	0.621458	-0.363544	5.11846e-28	8.19024e-24	0.00913565	0.790753	0.168213	0.00123731	0.215078	5.72169e-06
X12657_2	GDP-L-fucose synthase	FCL	TSTA3	0	0	0.664257	0.661617	0.620672	0.297204	7.76085e-19	8.2922e-22	-0.108778	0.00153143	-0.206068	7.14e-05	-0.180206	0.000152241
X20165_4	Dihydropyrimidinase	DPYS	DPYS	0	0	0.65793	0.654651	0.620505	-0.258627	1.73579e-14	7.26626e-12	0.0632746	0.0658367	0.0779996	0.136386	0.182761	0.000122034
X12853_112	Tropomodulin-2	TMOD2	TMOD2	-0.0118935	0	0.59861	0.664931	0.619734	0.170002	5.99818e-07	3.08809e-05	-0.385712	2.13e-31	0.0853391	0.103097	0.108637	0.0231327
X22088_3	Protein BTG1	BTG1	BTG1	0	0	0.615292	0.740194	0.619589	0.190936	1.94517e-08	1.19703e-19	-0.217497	1.62e-10	-0.0661133	0.206993	-0.0462286	0.334978
X4337_49	C-reactive protein	CRP	CRP	0	0	0.600864	0.662362	0.617843	-0.185315	5.07989e-08	0.000352745	0.148484	1.45e-05	0.0408523	0.43586	0.0840131	0.0793744
X19239_5	ADP-ribosylation factor 1	ARF1	ARF1	0	0	0.624593	0.676665	0.616945	0.211944	4.14502e-10	5.20674e-09	-0.358686	4.37e-27	0.207445	6.37e-05	0.31481	1.64967e-11
X13097_11	Bcl-2-like protein 2	Apoptosis regulator Bcl-W	BCL2L2	0	0	0.684971	0.673449	0.614786	0.323079	3.76791e-22	9.27806e-21	-0.230256	1.21e-11	-0.0152802	0.770788	0.0472509	0.324389
X22119_18	COP9 signalosome complex subunit 8	CSN8	COPS8	0	0	0.730783	0.670843	0.614671	-0.411988	3.06947e-36	2.62321e-38	0.0314098	0.361525	0.297918	6.15e-09	0.317284	1.122e-11
X21492_19	Clusterin-like protein 1	CLUL1	CLUL1	0	0	0.681207	0.699587	0.614596	-0.337525	3.8044e-24	1.41485e-23	0.116411	0.000692629	0.124395	0.0172688	-0.0110417	0.817961
X24304_3	EF-hand calcium-binding domain-containing protein 4B	EFC4B	CRACR2A	0	0	0.681641	0.65569	0.614537	-0.307737	3.80665e-20	3.77676e-18	0.0648377	0.0594204	0.147379	0.00472332	0.16792	0.00042302
X15474_7	Peptidyl-prolyl cis-trans isomerase NIMA-interacting 1	PIN1	PIN1	-0.00527846	0	0.575934	0.655344	0.613029	0.134381	8.33569e-05	0.00397582	-0.451988	7.93e-44	0.0683009	0.192327	0.268721	1.15181e-08
X4276_10	Phosphatidylethanolamine-binding protein 1	prostatic binding protein	PEBP1	0	-0.0643914	0.541362	0.631874	0.611949	0.0640693	0.0615816	0.192659	-0.336904	6.71e-24	0.215256	3.28e-05	0.349451	5.36711e-14
X21889_2	Uncharacterized protein C7orf24	CG024	GGCT	0	-0.0643914	0.545288	0.636487	0.611071	0.0800796	0.0193992	0.486133	-0.297769	8.78e-19	-0.00464733	0.929396	0.0639571	0.182029
X13563_259	Acyl-CoA-binding domain-containing protein 7	ACBD7	ACBD7	0	0	0.597566	0.655065	0.610683	0.176733	2.08046e-07	3.5123e-06	-0.226121	2.86e-11	0.0167615	0.749278	0.0686195	0.152133
X4272_46	Glucose-6-phosphate isomerase	PHI	GPI	0	0	0.563702	0.667097	0.610594	0.105312	0.00208392	0.0109247	-0.414603	1.78e-36	0.208894	5.64e-05	0.446539	8.35379e-23
X18930_28	Slit homolog 2 protein	SLIT2	SLIT2	-0.0388657	0	0.539907	0.651312	0.610307	0.0729574	0.0332322	0.142718	-0.37728	5.22e-30	0.0192543	0.713521	0.115778	0.0154569
X15434_5	Prepronociceptin	PNOC	PNOC	-0.00637341	0	0.592983	0.652783	0.609287	-0.152926	7.33872e-06	2.38597e-05	-0.0529635	0.12373	0.114241	0.0288708	0.132751	0.00544503
X12861_13	Tropomodulin-3	TMOD3	TMOD3	0	-0.0214538	0.554132	0.644559	0.608643	0.0929299	0.00663901	0.120855	-0.476719	3.23e-49	0.225583	1.32e-05	0.469992	2.13476e-25
X23621_326	Mitochondrial import inner membrane translocase subunit Tim13	TIM13	TIMM13	0	0	0.756997	0.630046	0.606994	-0.441479	5.96205e-42	4.89731e-40	0.109493	0.00142468	0.194181	0.000185619	0.296635	2.51274e-10
X22544_10	DNA repair protein RAD51 homolog 3	RA51C	RAD51C	0	0	0.675971	0.634551	0.606834	-0.306674	5.18967e-20	9.07194e-16	0.0409765	0.233818	0.290127	1.57e-08	0.310676	3.11615e-11
X21207_1	Bifunctional coenzyme A synthase	COASY	COASY	0	0	0.686418	0.663196	0.606741	-0.321797	5.59964e-22	2.08184e-38	-0.0436637	0.204536	0.192869	0.000205561	0.267967	1.26991e-08
X24179_48	Phosphotriesterase-related protein	PTER	PTER	0	0	0.59765	0.672875	0.606651	-0.15543	5.16641e-06	1.25527e-05	0.0482167	0.161161	0.0741235	0.157021	0.139699	0.00342977
X7997_118	Double C2-like domain-containing protein beta	DOC2B	DOC2B	0	-0.0643914	0.546871	0.631495	0.606625	0.0818251	0.0168991	0.295991	-0.328536	9.66e-23	0.0326214	0.533866	0.179591	0.000160488
X19229_92	Homer protein homolog 1	HOME1	HOMER1	0	0	0.561304	0.656416	0.606357	0.108399	0.00153099	0.00739874	-0.319597	1.52e-21	0.0117669	0.822484	0.00493935	0.917995
X21152_25	Eyes absent homolog 2	EYA2	EYA2	0	0	0.607492	0.628859	0.604969	0.18586	4.63449e-08	1.80684e-07	-0.265811	3.79e-15	0.0786185	0.133294	0.165762	0.000502625
X11476_43	Vacuolar protein sorting-associated protein 4A	VPS4A	VPS4A	0	-0.0388657	0.551311	0.65215	0.604373	0.0866308	0.0114155	0.193012	-0.371815	3.95e-29	0.05699	0.276844	0.179931	0.00015588
X13934_3	Guanine nucleotide exchange factor DBS	MCF2L	MCF2L	0	0	0.712516	0.665385	0.604332	-0.36339	5.40976e-28	5.0733e-33	0.0767729	0.0255478	0.172067	0.000948865	0.258257	4.33911e-08
X11556_19	ADP-ribosylation factor GTPase-activating protein 1	ARFG1	ARFGAP1	0	0	0.689409	0.646528	0.603762	-0.325625	1.70649e-22	4.48201e-19	0.0396409	0.249425	0.207122	6.54e-05	0.283887	1.51954e-09
X9900_36	Neurofilament heavy polypeptide	NFH	NEFH	0	0	0.538926	0.62307	0.603729	0.0644677	0.0599793	0.305737	-0.408064	2.78e-35	0.367465	3.83e-13	0.644608	1.10726e-52
X17781_191	Microtubule-associated proteins 1A/1B light chain 3A	MLP3A	MAP1LC3A	0	-0.0643914	0.524169	0.625322	0.602992	0.035319	0.303134	0.621781	-0.334782	1.33e-23	0.168582	0.00120652	0.330773	1.28831e-12
X6439_59	Uncharacterized protein C14orf93	CN093	C14orf93	0	0	0.648261	0.635798	0.601678	-0.258156	1.9424e-14	6.02182e-11	0.0989598	0.00396198	0.242497	2.68e-06	0.23382	7.70944e-07
X13967_14	Thioredoxin reductase 1, cytoplasmic	Thioredoxin reductase 1	TXNRD1	0	-0.0643914	0.543515	0.634603	0.601369	0.0753536	0.0278496	0.402216	-0.353465	2.67e-26	0.0591921	0.258675	0.17391	0.00025923
X16872_248	Maleylacetoacetate isomerase	MAAI	GSTZ1	0	0	0.647737	0.648129	0.600773	0.244572	4.53538e-13	2.24662e-11	-0.0530504	0.123114	-0.138061	0.00817148	-0.154605	0.00118609
X20936_8	Putative deoxyribonuclease TATDN3	TATD3	TATDN3	0	0	0.527172	0.619451	0.600002	0.0466478	0.17372	0.276478	-0.199978	4.43e-09	-0.0545399	0.298054	-0.0159536	0.739459
X7203_125	Beta-1,3-N-acetylglucosaminyltransferase radical fringe	RFNG	RFNG	0	0.00453564	0.652352	0.658337	0.599946	-0.264776	3.90696e-15	4.72015e-14	-0.0622556	0.0703191	0.232572	6.93e-06	0.274195	5.62459e-09
X21508_7	Alpha-N-acetylneuraminide alpha-2,8-sialyltransferase	SIA8A	ST8SIA1	0	0.00453564	0.722714	0.696211	0.599805	-0.38389	2.64807e-31	3.91167e-36	0.0539692	0.116747	0.169693	0.00111812	0.220638	3.21416e-06
X22045_8	Small ubiquitin-related modifier 4	SUMO4	SUMO4	0	0	0.555243	0.626722	0.59848	0.0997999	0.00354472	0.0378332	-0.233391	6.26e-12	0.0173423	0.740896	0.0179498	0.708264
X15325_14	Neuromodulin	NEUM	GAP43	0	-0.0643914	0.540624	0.627593	0.597728	0.0741838	0.0303756	0.207904	-0.328131	1.1e-22	0.0223621	0.669815	0.134768	0.00477126
X18395_5	[Protein ADP-ribosylarginine] hydrolase	ADPRH	ADPRH	0	0	0.65374	0.635891	0.597642	0.276042	2.29589e-16	1.08897e-15	0.00512893	0.881585	-0.278998	5.72e-08	-0.219483	3.6277e-06
X12842_43	Syntaxin-10	STX10	STX10	0	0	0.591788	0.619637	0.597575	-0.154133	6.20108e-06	0.000815075	0.0342261	0.320066	0.11223	0.0318315	0.096865	0.0429825
X22811_5	Translation machinery-associated protein 16	TMA16	TMA16	0	0	0.677814	0.662816	0.597508	-0.300119	3.41156e-19	5.08773e-44	0.0519174	0.131335	0.100341	0.0551212	0.0742285	0.121284
X22005_8	[Pyruvate dehydrogenase [acetyl-transferring]]-phosphatase 1, mitochondrial	PDP1	PDP1	0	0	0.6606	0.664484	0.597106	-0.278459	1.22839e-16	9.60984e-15	0.108178	0.00162664	0.123489	0.0181054	0.0384943	0.422149
X23677_30	NCK-interacting protein with SH3 domain	SPN90	NCKIPSD	-0.0114732	0	0.576082	0.640772	0.596949	0.130151	0.00013918	0.00290128	-0.409062	1.83e-35	0.251375	1.11e-06	0.281265	2.17589e-09
X18190_15	Caspase recruitment domain-containing protein 18	ICBR	CARD18	0	0	0.655103	0.644834	0.596261	0.2749	3.07897e-16	4.40356e-17	-0.066227	0.0541607	-0.246273	1.85e-06	-0.194213	4.36436e-05
X3419_49	Calcium/calmodulin-dependent protein kinase type II subunit delta	CAMK2D	CAMK2D	0	0	0.566812	0.602995	0.595382	0.117576	0.000584215	0.0166088	-0.19428	1.22e-08	-0.0655449	0.210933	-0.064851	0.175984
X8070_88	Disks large homolog 4	DLG4	DLG4	0	0	0.51761	0.639365	0.594477	0.0291897	0.394797	0.820785	-0.317914	2.54e-21	0.123175	0.0184038	0.28493	1.31577e-09
X9834_62	Alcohol dehydrogenase 1B	ADH1B	ADH1B	0	0	0.656292	0.619574	0.594462	0.271406	7.49005e-16	7.24892e-16	-0.281061	7.99e-17	0.0942775	0.0716273	0.137945	0.00386158
X18303_39	Neurogranin	NEUG	NRGN	0	-0.0643914	0.538434	0.630571	0.594388	0.0708483	0.0386817	0.26211	-0.329926	6.24e-23	0.0292677	0.576757	0.146602	0.0021229
X6334_9	Inactive gamma-glutamyltranspeptidase 2	GGT2	GGT2	0	0	0.617299	0.626111	0.593952	0.2029	2.28629e-09	3.43854e-36	-0.23301	6.79e-12	0.093341	0.0745039	0.23691	5.44855e-07
X5918_5	Proteasome activator complex subunit 1	PSME1	PSME1	0	0	0.660936	0.641513	0.593506	-0.283204	3.53255e-17	1.162e-14	-0.00206381	0.952204	0.277165	7.03e-08	0.324723	3.44697e-12
X12564_9	60S ribosome subunit biogenesis protein NIP7 homolog	NIP7	NIP7	0	0	0.650225	0.650497	0.593331	-0.26892	1.39904e-15	7.32116e-51	0.253747	6.75e-14	-0.0319606	0.542189	-0.0289279	0.54643
X23601_43	Acyl-coenzyme A thioesterase 12	ACO12	ACOT12	0	0	0.705596	0.631067	0.593189	-0.362506	7.42549e-28	4.67255e-30	0.00872547	0.799944	0.22014	2.14e-05	0.352884	2.92316e-14
X19290_5	Hypoxanthine-guanine phosphoribosyltransferase	HPRT	HPRT1	0	-0.0643914	0.53172	0.629581	0.59288	0.0559682	0.102566	0.555526	-0.33318	2.22e-23	0.0636134	0.224724	0.188147	7.58162e-05
X14120_2	E3 ubiquitin-protein ligase RNF43	RNF43	RNF43	0	0	0.616698	0.639886	0.592437	-0.199712	4.09795e-09	2.33423e-12	0.143371	2.84e-05	-0.0401214	0.444122	-0.0800725	0.0945697
X21001_393	Protein BRICK1	BRK1	BRK1	0	0	0.672155	0.640854	0.592218	-0.286841	1.33716e-17	1.3254e-16	0.156537	4.77e-06	-0.020301	0.698688	-0.108756	0.0229821
X13131_5	Hexokinase-1	HXK1	HK1	0	0	0.643606	0.630184	0.592218	-0.270255	1.00113e-15	1.98468e-28	-0.0227563	0.508614	0.166383	0.0014007	0.166675	0.000467377
X9883_29	Lactoylglutathione lyase	Glyoxalase I	GLO1	0	-0.0388657	0.533545	0.603468	0.591976	0.0567748	0.0977003	0.527703	-0.31002	2.65e-20	0.011758	0.822616	0.174333	0.00025026
X21667_57	Calcium/calmodulin-dependent 3',5'-cyclic nucleotide phosphodiesterase 1B	PDE1B	PDE1B	0	-0.0643914	0.539542	0.638665	0.591868	0.0723862	0.034639	0.178786	-0.315046	6e-21	0.0405596	0.439158	0.201928	2.10916e-05
X24717_26	Serine/threonine-protein phosphatase 2A regulatory subunit B'	PTPA	PTPA	0	-0.0214538	0.564889	0.610244	0.591197	0.109994	0.00130136	0.0499175	-0.466043	7.76e-47	0.268263	1.88e-07	0.504727	1.26569e-29
X23528_199	Phytanoyl-CoA hydroxylase-interacting protein-like	PHIPL	PHYHIPL	0	-0.0643914	0.553554	0.63645	0.591138	0.0870868	0.010988	0.0444778	-0.392029	1.82e-32	0.059253	0.258184	0.195426	3.90024e-05
X2714_78	Endothelial monocyte-activating polypeptide 2	EMAP-2	AIMP1	0	0	0.657849	0.638367	0.590963	-0.266919	2.30217e-15	2.22835e-12	-0.00666075	0.846606	0.129946	0.012844	0.154853	0.00116434
X3115_64	Mitogen-activated protein kinase 1	MK01	MAPK1	0	0	0.59609	0.612828	0.590862	0.165167	1.25133e-06	4.45888e-05	-0.286559	1.87e-17	0.0580684	0.267841	0.205501	1.49174e-05
X3432_21	Ephrin type-A receptor 3	EPHA3	EPHA3	0	0	0.522881	0.59699	0.590561	0.0398323	0.24547	0.220524	-0.197586	6.8e-09	-0.0658002	0.209157	0.0101204	0.832917
X4707_50	14-3-3 protein eta	14-3-3 eta	YWHAH	0	-0.0643914	0.535009	0.623498	0.590512	0.0605035	0.0775533	0.478484	-0.325807	2.27e-22	0.0613934	0.241352	0.192024	5.3375e-05
X21173_25	ELAV-like protein 2	ELAV2	ELAVL2	0	-0.0643914	0.537028	0.637578	0.590185	0.0602804	0.078655	0.531041	-0.296779	1.16e-18	0.0887535	0.0899817	0.197124	3.32816e-05
X14685_17	RAC-beta serine/threonine-protein kinase	PKB beta	AKT2	0	0	0.649514	0.622854	0.589917	-0.260049	1.2337e-14	2.77792e-13	-0.0435195	0.206036	0.167601	0.0012899	0.275425	4.77723e-09
X8901_40	14-3-3 protein gamma	14-3-3 protein gamma	YWHAG	0	-0.0643914	0.53991	0.641338	0.589909	0.0688551	0.0445107	0.305758	-0.335506	1.05e-23	0.0495789	0.344232	0.201253	2.25013e-05
X23546_9	Hydroxyacylglutathione hydrolase-like protein	HAGHL	HAGHL	0	-0.0643914	0.533102	0.615322	0.589381	0.0581826	0.0896517	0.704857	-0.31649	3.89e-21	0.0687227	0.189588	0.268001	1.26421e-08
X19113_66	SH3 domain-binding glutamic acid-rich-like protein 2	SH3L2	SH3BGRL2	0	-0.0643914	0.521305	0.60861	0.589373	0.034778	0.310605	0.871546	-0.329961	6.17e-23	0.12879	0.0136727	0.268313	1.21424e-08
X14227_21	Myosin light chain 6B	MYL6B	MYL6B	0	0	0.680264	0.635448	0.588964	-0.302418	1.77189e-19	9.21884e-18	0.0427549	0.214125	0.231129	7.92e-06	0.269468	1.04553e-08
X21130_82	Inositol-tetrakisphosphate 1-kinase	ITPK1	ITPK1	0	0	0.656257	0.631454	0.588744	-0.271174	7.94116e-16	5.50492e-13	-0.115955	0.000727223	0.204364	8.22e-05	0.297871	2.10043e-10
X12817_1	GTP-binding protein GEM	GEM	GEM	0	0	0.690636	0.627299	0.588416	-0.332283	2.07401e-23	1.22079e-27	0.134936	8.25e-05	0.171165	0.00101023	0.128507	0.00714834
X23631_1	N-acetylgalactosamine kinase	GALK2	GALK2	0	0	0.675054	0.630061	0.588241	-0.297428	7.28844e-19	1.37259e-15	-0.0279938	0.416112	0.170418	0.00106373	0.317234	1.13087e-11
X8076_4	Sperm acrosome membrane-associated protein 3	SACA3	SPACA3	0	0	0.65602	0.616901	0.587765	-0.263341	5.55214e-15	4.00944e-14	0.0797655	0.0203229	0.113128	0.0304789	0.157959	0.000921627
X8358_30	Thioredoxin-dependent peroxide reductase, mitochondrial	Peroxiredoxin-3	PRDX3	0	-0.0643914	0.541278	0.621357	0.58769	0.0661561	0.0535681	0.171529	-0.346096	3.26e-25	-0.00424786	0.935451	0.181196	0.000139789
X9099_19	Synaptotagmin-5	SYT5	SYT5	0	-0.0643914	0.54534	0.622169	0.587549	0.0863256	0.0117099	0.11336	-0.352004	4.41e-26	-0.00817812	0.876093	0.135842	0.00444412
X9738_7	FAS-associated factor 2	FAF2	FAF2	0	-0.0643914	0.527348	0.599455	0.587322	0.0432865	0.206866	0.70806	-0.283843	3.85e-17	0.0900142	0.0854915	0.246577	1.78301e-07
X11354_21	1-phosphatidylinositol 4,5-bisphosphate phosphodiesterase beta-1	Phospholipase C-beta-1	PLCB1	0	-0.0643914	0.538281	0.613684	0.587229	0.0700883	0.040823	0.306711	-0.309542	3.04e-20	-0.0137616	0.793024	0.0805103	0.0927747
X5864_10	Fructose-bisphosphate aldolase A	aldolase A	ALDOA	0	-0.0643914	0.526477	0.618286	0.587046	0.0448624	0.190796	0.681443	-0.305217	1.07e-19	0.0388174	0.459082	0.172034	0.000302705
X14593_152	Protein FAM210A	F210A	FAM210A	0	0	0.696682	0.6096	0.586544	-0.334596	9.85319e-24	2.2735e-22	0.0527333	0.125374	0.151077	0.00376701	0.234933	6.80723e-07
X17671_58	Inhibitor of growth protein 4	ING4	ING4	0	0	0.647266	0.618085	0.586335	0.260592	1.08227e-14	1.10862e-14	-0.0203808	0.553862	-0.219623	2.24e-05	-0.0570207	0.234225
X9199_6	Ubiquitin-conjugating enzyme E2 G2	UB2G2	UBE2G2	0	0	0.632572	0.616193	0.58558	-0.227627	1.78128e-11	5.8634e-10	0.00486193	0.887707	0.165369	0.00149961	0.164831	0.00054108
X24488_8	Protein HID1	HID1	HID1	0	0	0.724511	0.636993	0.585185	-0.38157	6.4491e-31	6.64883e-31	0.0719915	0.0362982	0.130076	0.0127538	0.166697	0.000466572
X25219_17	V-type proton ATPase subunit F	VATF	ATP6V1F	0	-0.0214538	0.543674	0.613036	0.584835	0.0772287	0.0241779	0.0524252	-0.416317	8.57e-37	0.18458	0.000385686	0.397985	4.88468e-18
X14156_33	14-3-3 protein beta/alpha	14-3-3 protein beta/alpha	YWHAB	0	-0.0643914	0.551135	0.646602	0.584612	0.0895264	0.00893305	0.161581	-0.415771	1.08e-36	0.217727	2.65e-05	0.408482	5.28297e-19
X17791_25	Hippocalcin-like protein 1	HPCL1	HPCAL1	0	-0.0643914	0.509162	0.605635	0.584526	0.0176499	0.606926	0.899347	-0.284599	3.15e-17	0.0709338	0.175702	0.186732	8.60243e-05
X17393_13	Short-chain specific acyl-CoA dehydrogenase, mitochondrial	SCAD	ACADS	0	0	0.628137	0.627146	0.584366	0.223406	4.25385e-11	7.7004e-11	-0.212342	4.42e-10	0.0307881	0.557113	0.178273	0.00017961
X11254_13	Papilin	PPN	PAPLN	0	0	0.604972	0.614097	0.584057	0.189858	2.3436e-08	9.81259e-07	-0.0493866	0.151226	-0.128203	0.0141111	-0.163278	0.00061144
X21955_36	Large proline-rich protein BAT3	BAT3	BAG6	0	-0.0643914	0.523677	0.598074	0.583848	0.0402416	0.24065	0.642833	-0.300433	4.16e-19	0.130971	0.0121461	0.240748	3.51665e-07
X24474_12	Tetratricopeptide repeat protein 9A	TTC9A	TTC9	-0.00619576	0	0.558307	0.613498	0.583554	0.103934	0.00238542	0.0343427	-0.324196	3.73e-22	-0.0497818	0.342258	0.135546	0.00453243
X21140_19	Calcium signal-modulating cyclophilin ligand	CAMLG	CAMLG	0	0	0.58153	0.652645	0.583338	0.153309	6.95757e-06	0.000116896	-0.293926	2.54e-18	-0.0222266	0.671698	0.124728	0.00905133
X17761_2	ADP-sugar pyrophosphatase	NUDT5	NUDT5	0	0	0.511566	0.5796	0.58307	0.0149104	0.663848	0.845412	-0.170921	5.71e-07	0.120044	0.0216164	0.173849	0.000260548
X12457_10	1,2-dihydroxy-3-keto-5-methylthiopentene dioxygenase	MTND	ADI1	0	0	0.674952	0.613394	0.582683	-0.308017	3.50834e-20	2.99528e-18	-0.0244599	0.477397	0.256603	6.5e-07	0.336887	4.66039e-13
X25912_131	FK506 binding protein 1A	FK506 binding protein 1A	FKBP1A	0	0	0.572593	0.608014	0.582426	0.127472	0.000191056	0.0111071	-0.362202	1.27e-27	0.0456946	0.383397	0.204803	1.5969e-05
X19392_6	N(G),N(G)-dimethylarginine dimethylaminohydrolase 1	DDAH1	DDAH1	0	-0.0643914	0.533505	0.609105	0.582333	0.0521953	0.127926	0.455069	-0.294735	2.04e-18	0.0805065	0.124193	0.173945	0.000258464
X19267_14	Hydroxyacylglutathione hydrolase, mitochondrial	GLO2	HAGH	0	-0.0643914	0.530085	0.627426	0.581857	0.0523074	0.127108	0.435998	-0.348309	1.55e-25	0.0867358	0.0975598	0.231107	1.04154e-06
X17367_5	Stathmin	Stathmin	STMN1	0	-0.0643914	0.535475	0.623055	0.581823	0.060792	0.0761465	0.693085	-0.329085	8.13e-23	0.102816	0.0493603	0.25472	6.70676e-08
X24895_25	F-BAR and double SH3 domains protein 1	FCSD1	FCHSD1	0	0	0.674299	0.623598	0.581596	-0.307126	4.5505e-20	6.80285e-22	-0.0103177	0.764433	0.328713	1.14e-10	0.422393	2.44949e-20
X3896_5	Phosphoglycerate mutase 1	Phosphoglycerate mutase 1	PGAM1	0	0	0.562756	0.594567	0.581235	0.105825	0.00198081	0.0434203	-0.316713	3.64e-21	0.113895	0.0293628	0.236791	5.52197e-07
X3872_2	Translationally-controlled tumor protein	TCTP	TPT1	0	-0.0643914	0.530018	0.605468	0.581134	0.0494822	0.148992	0.621755	-0.345023	4.66e-25	0.171868	0.000962132	0.357786	1.21199e-14
X7202_107	Semaphorin-6C	SEMA6C	SEMA6C	0	0	0.676344	0.615341	0.580769	-0.303271	1.38756e-19	9.309e-17	0.00795657	0.817247	0.244775	2.15e-06	0.284456	1.40485e-09
X22466_27	Transcription factor HES-5	HES5	HES5	0	0	0.631785	0.625467	0.580643	-0.227945	1.66696e-11	6.69691e-13	0.0041628	0.903769	0.0754695	0.149604	0.0813347	0.0894683
X18910_45	Protein lin-7 homolog A	LIN7A	LIN7A	0	0	0.500362	0.605438	0.580617	-0.00154114	0.964172	0.541774	-0.253533	7.1e-14	0.130625	0.0123783	0.267672	1.31913e-08
X11649_3	Stromal membrane-associated protein 1	SMAP1	SMAP1	0	0	0.540616	0.604794	0.580591	0.0662568	0.0532046	3.60665e-07	-0.35469	1.75e-26	0.101393	0.0526071	0.231273	1.02273e-06
X21249_115	DNA fragmentation factor subunit alpha	DFFA	DFFA	0	0	0.550412	0.621018	0.580475	0.0806257	0.0185845	0.0455776	-0.123086	0.000332645	-0.00117783	0.982084	0.0376987	0.431811
X24434_16	Phytanoyl-CoA hydroxylase-interacting protein	PHYIP	PHYHIP	0	0	0.614079	0.612046	0.580431	-0.201557	2.92702e-09	1.00451e-07	-0.0586844	0.0880369	0.270774	1.43e-07	0.27132	8.21207e-09
X3600_2	Chitotriosidase-1	Chitotriosidase-1	CHIT1	-0.00631319	0	0.558012	0.613598	0.580356	0.103359	0.00252273	0.331	-0.334324	1.54e-23	0.146641	0.00493854	0.184158	0.000108002
X24637_3	Transcription elongation factor A protein-like 5	TCAL5	TCEAL5	0	-0.0158848	0.546928	0.616141	0.58014	0.0791471	0.0208626	0.103555	-0.380833	1.37e-30	0.207405	6.39e-05	0.404987	1.11755e-18
X10900_272	Stathmin-2	STMN2	STMN2	0	-0.0643914	0.54282	0.630609	0.58004	0.0736137	0.0316761	0.501686	-0.340082	2.39e-24	0.0945121	0.0709212	0.261392	2.93409e-08
X17775_8	Transgelin-3	TAGL3	TAGLN3	0	-0.0643914	0.514243	0.597701	0.579805	0.0225846	0.51032	0.82461	-0.292114	4.18e-18	0.10059	0.0545171	0.200154	2.49926e-05
X17156_72	Serine/threonine-protein kinase DCLK1	DCAK1	DCLK1	0	-0.0643914	0.52657	0.61333	0.579604	0.047028	0.170236	0.727075	-0.301493	3.08e-19	0.0356134	0.497005	0.180671	0.000146272
X11490_42	Ubiquitin-like protein 4A	UBL4A	UBL4A	0	-0.0643914	0.516453	0.610266	0.579586	0.0258371	0.451343	0.893113	-0.30323	1.88e-19	0.0829533	0.113127	0.247996	1.50741e-07
X13242_134	SH3 and multiple ankyrin repeat domains protein 3	SHAN3	SHANK3	0	-0.0643914	0.538226	0.612247	0.579396	0.0606072	0.0770451	0.384868	-0.322615	6.07e-22	0.113635	0.029737	0.242362	2.91871e-07
X12671_35	Sulfotransferase family cytosolic 1B member 1	ST1B1	SULT1B1	0	0	0.696005	0.621811	0.579269	0.344414	3.8947e-25	2.26551e-20	-0.0815465	0.0176771	-0.203195	9.04e-05	-0.241742	3.13583e-07
X14029_42	COP9 signalosome complex subunit 2	CSN2	COPS2	0	0	0.6898	0.591101	0.578968	-0.325362	1.8524e-22	2.92524e-20	-0.0270002	0.432857	0.22467	1.43e-05	0.288273	8.2637e-10
X3503_4	Integrin alpha-I: beta-1 complex	Integrin a1b1	ITGA1|ITGB1	0	-0.00782794	0.532206	0.605922	0.578726	0.0539754	0.115413	0.790167	-0.417604	4.94e-37	0.199984	0.000117247	0.437993	6.57379e-22
X8950_4	Calcium-activated chloride channel regulator 2	CLCA2	CLCA2	0	0	0.564539	0.58463	0.578726	0.118651	0.000519517	2.96868e-05	-0.167427	9.72e-07	0.0112287	0.830478	0.15633	0.00104241
X21478_20	SMAD5	SMAD5	SMAD5	0	0	0.534671	0.625962	0.578458	0.062094	0.0700554	0.618899	-0.176136	2.52e-07	-0.0817224	0.118593	0.00384766	0.936075
X19196_73	Homeodomain-only protein	HOP	HOPX	0	-0.0643914	0.542158	0.6168	0.57829	0.0723385	0.0347589	0.535945	-0.321161	9.47e-22	0.08268	0.114323	0.223159	2.46253e-06
X22989_24	Protein lin-7 homolog A	LIN7A	LIN7A	0	0	0.540387	0.605602	0.578156	0.0704002	0.0399325	0.118946	-0.206836	1.26e-09	0.0256086	0.625319	0.0953701	0.0463159
X7695_106	Sequestosome-1	SQSTM	SQSTM1	0	0	0.604156	0.611246	0.577914	-0.17588	2.38452e-07	4.53366e-09	-0.0670603	0.0511961	0.246615	1.79e-06	0.235475	6.4055e-07
X23364_3	Uridine-cytidine kinase 1	UCK1	UCK1	0	0	0.621101	0.622705	0.577646	-0.198067	5.51791e-09	2.31788e-07	0.225981	2.94e-11	-0.0403397	0.441646	-0.0961666	0.0445139
X25276_32	Rab-like protein 6	RABL6	RABL6	0	-0.0643914	0.527357	0.619849	0.577646	0.0445625	0.193782	0.754279	-0.29254	3.72e-18	0.141058	0.00687382	0.280683	2.35514e-09
X24255_38	Epsin-1	EPN1	EPN1	0	-0.0214538	0.533505	0.582731	0.577594	0.0529755	0.122318	0.615359	-0.309186	3.38e-20	0.205271	7.63e-05	0.307081	5.37472e-11
X12796_44	Diphosphoinositol polyphosphate phosphohydrolase 1	NUDT3	NUDT3	0	0	0.563983	0.603833	0.577545	0.1029	0.0026374	0.0550646	-0.340059	2.4e-24	0.102586	0.0498739	0.234695	6.99144e-07
X18178_13	Serine--tRNA ligase, cytoplasmic	SYSC	SARS1	0	0	0.661283	0.613141	0.577318	-0.2828	3.93216e-17	2.34008e-14	-0.00422792	0.902272	0.197356	0.000144597	0.298947	1.79557e-10
X11438_6	DnaJ homolog subfamily B member 2	DNJB2	DNAJB2	0	-0.0388657	0.535666	0.58976	0.576667	0.0605697	0.0772286	0.502562	-0.241964	9.77e-13	0.0308452	0.556381	0.0930042	0.0520336
X12401_3	AMSH-like protease	STALP	STAMBPL1	0	-0.0643914	0.525552	0.594414	0.576641	0.0469658	0.170803	0.712131	-0.279749	1.12e-16	0.0408687	0.435676	0.164415	0.000559182
X25060_18	NADP-dependent malic enzyme	MAOX	ME1	0	-0.0643914	0.513027	0.598703	0.576615	0.0177378	0.605136	0.788497	-0.234016	5.48e-12	0.0882782	0.0917228	0.13274	0.00544864
X25299_11	Nuclear receptor coactivator 7	NCOA7	NCOA7	0	0	0.557592	0.602761	0.576112	0.110639	0.00121792	0.0011272	-0.128624	0.000175961	-0.11577	0.0267811	-0.126476	0.00812109
X20111_5	Brain acid soluble protein 1	BASP	BASP1	0	-0.0643914	0.536988	0.602065	0.576097	0.0663088	0.0530175	0.504228	-0.284135	3.56e-17	0.00437165	0.933574	0.0985591	0.0394513
X3766_51	Syntaxin-1A	STX1a	STX1A	0	-0.0643914	0.528497	0.599135	0.575535	0.0507393	0.138924	0.459229	-0.298879	6.44e-19	0.0103049	0.844238	0.0876387	0.0672018
X12651_21	[Pyruvate dehydrogenase (acetyl-transferring)] kinase isozyme 2, mitochondrial	PDK2	PDK2	0	0	0.65265	0.666848	0.575449	-0.250614	1.14299e-13	5.37612e-13	-0.0204534	0.552451	0.0930153	0.0755263	0.243342	2.60493e-07
X5744_12	Protein MENT	CA056	MENT	0	0	0.614247	0.605851	0.575282	0.214151	2.70009e-10	5.11097e-20	-0.167102	1.02e-06	0.0516905	0.324047	0.132911	0.00538835
X17721_82	Growth arrest-specific protein 7	GAS7	GAS7	0	-0.0643914	0.55605	0.605438	0.574932	0.0933406	0.00640146	0.251764	-0.361567	1.59e-27	0.164865	0.00155112	0.254933	6.53418e-08
X3351_1	Calcium/calmodulin-dependent protein kinase type II subunit beta	CAMK2B	CAMK2B	0	0	0.59414	0.6104	0.574805	0.16098	2.32618e-06	0.000652342	-0.353888	2.31e-26	0.0102844	0.844545	0.114665	0.0164819
X24908_19	Amphiphysin	AMPH	AMPH	0	-0.0643914	0.525485	0.607456	0.574597	0.0420588	0.220049	0.838325	-0.312183	1.4e-20	0.0696022	0.183972	0.213728	6.5666e-06
X21569_49	Serine/threonine kinase 10	STK10	STK10	0	0	0.617294	0.621201	0.574366	-0.20109	3.18831e-09	9.39631e-97	-0.0687571	0.0455775	0.170651	0.00104674	0.29702	2.3766e-10
X17706_4	Protein phosphatase 1 regulatory subunit 1A	PPR1A	PPP1R1A	0	-0.0643914	0.546168	0.625508	0.573837	0.0842668	0.0138769	0.1815	-0.349274	1.12e-25	0.0619538	0.237075	0.214622	5.99463e-06
X14675_20	Eukaryotic translation initiation factor 4B	IF4B	EIF4B	0	0	0.561223	0.618114	0.573796	0.100356	0.00336357	0.0275966	-0.369291	9.93e-29	0.189111	0.000274326	0.232982	8.46374e-07
X14334_3	Recoverin	RECO	RCVRN	0	0	0.583757	0.601566	0.57377	-0.142793	2.87261e-05	2.49366e-06	0.0135269	0.694407	-0.00897352	0.864153	0.103654	0.0302748
X2788_55	Stromelysin-1	MMP-3	MMP3	0	0	0.550623	0.635865	0.573666	0.0831855	0.015151	0.0359528	-0.0649755	0.0588806	-0.0806593	0.123479	-0.0555175	0.246808
X13113_7	Osteopontin	Osteopontin	SPP1	0	0	0.521539	0.618721	0.573566	0.0363422	0.289333	0.746824	-0.27006	1.32e-15	-0.0271265	0.604961	0.130768	0.00618929
X4250_23	NSFL1 cofactor p47	NSF1C	NSFL1C	0	-0.0643914	0.524935	0.613531	0.573409	0.0390665	0.254673	0.749837	-0.295273	1.76e-18	0.125146	0.0166017	0.273321	6.31345e-09
X4230_1	Eukaryotic translation initiation factor 4 gamma 2	IF4G2	EIF4G2	0	-0.0214538	0.527846	0.593595	0.573409	0.038735	0.258729	0.569367	-0.334658	1.38e-23	0.378943	6.07e-14	0.437841	6.81524e-22
X13256_21	SH3 and multiple ankyrin repeat domains protein 1	SHAN1	SHANK1	0	0	0.535214	0.606406	0.573208	0.0589499	0.0854941	0.512804	-0.243114	7.58e-13	0.0370084	0.480292	0.102305	0.0325066
X11659_31	Clathrin interactor 1	EPN4	CLINT1	0	-0.0643914	0.515096	0.596372	0.573167	0.0209097	0.542189	0.923457	-0.269566	1.5e-15	0.0832233	0.111955	0.222575	2.62002e-06
X14021_81	Mediator of RNA polymerase II transcription subunit 4	MED4	MED4	0	0	0.57165	0.584608	0.5731	-0.118979	0.000501132	8.367e-05	0.0666562	0.0526162	0.021471	0.682241	-0.0366611	0.444602
X8963_8	Vesicle transport through interaction with t-SNAREs homolog 1B	Vti1-rp1	VTI1B	0	-0.0643914	0.513004	0.590229	0.573067	0.0235902	0.491667	0.966811	-0.280766	8.63e-17	0.0969253	0.0639812	0.249619	1.24235e-07
X11128_29	Transmembrane protein 132C:Cytoplasmic domain	T132C:CD	TMEM132C	0	0	0.579727	0.625866	0.572765	0.141121	3.56728e-05	0.000132187	-0.201793	3.19e-09	0.0548742	0.295098	0.223278	2.43158e-06
X12329_21	Ribosomal protein S6 kinase alpha-1	KS6A1	RPS6KA1	0	0	0.574265	0.58992	0.572322	0.137076	5.96469e-05	0.000240778	0.107896	0.0016734	-0.288001	2.02e-08	-0.278317	3.24377e-09
X22816_4	Tripartite motif-containing protein 54	TRI54	TRIM54	0	0	0.622871	0.580866	0.572303	-0.22188	5.80183e-11	2.65852e-15	0.0426125	0.215656	0.121998	0.0195588	0.120381	0.0117864
X5312_49	Apolipoprotein E (isoform E2)	Apo E2	APOE	0	0	0.625209	0.607988	0.572121	0.216207	1.80378e-10	5.67822e-09	-0.0423197	0.21883	-0.0726196	0.165633	-0.229906	1.1886e-06
X17771_35	DNA-directed RNA polymerase III subunit RPC9	RPC9	CRCP	0	0	0.645136	0.60597	0.572102	-0.245244	3.89797e-13	2.52604e-11	-0.00777138	0.821428	0.229682	9.06e-06	0.308308	4.46603e-11
X8479_4	Stromelysin-2	MMP-10	MMP10	0	0	0.570819	0.614272	0.571786	0.121082	0.000396927	0.00544176	-0.0559392	0.103967	-0.0142302	0.786144	-0.0892047	0.0624399
X20448_7	DNA-directed RNA polymerases I, II, and III subunit RPABC2	RPAB2	POLR2F	0	0	0.601199	0.587925	0.57135	-0.176431	2.18355e-07	1.988e-05	0.198528	5.75e-09	-0.0343054	0.512952	-0.167035	0.000454121
X15524_30	Phosphoglycerate mutase 2	PGAM2	PGAM2	0	0	0.538729	0.574336	0.570647	0.055646	0.104562	0.100176	-0.243775	6.54e-13	0.137007	0.0086772	0.156904	0.000998252
X9169_14	Small ubiquitin-related modifier 3	SUMO3	SUMO3	0	-0.0643914	0.528372	0.607359	0.570531	0.0476681	0.164488	0.788213	-0.303333	1.83e-19	0.096289	0.0657545	0.225489	1.91955e-06
X21110_5	Ubiquitin-conjugating enzyme E2 Z	UBE2Z	UBE2Z	0	-0.0388657	0.527632	0.617359	0.570464	0.0454559	0.184988	0.698083	-0.341465	1.51e-24	0.193184	0.000200586	0.387621	4.06842e-17
X12661_44	Gamma-aminobutyric acid receptor-associated protein-like 1	GBRL1	GABARAPL1	0	-0.0643914	0.532504	0.598852	0.570211	0.0536223	0.117815	0.526693	-0.287993	1.28e-17	0.0800776	0.126217	0.208782	1.07959e-05
X3853_56	Malate dehydrogenase, cytoplasmic	MDHC	MDH1	0	-0.0643914	0.53104	0.610378	0.570129	0.0514931	0.133143	0.708774	-0.275293	3.54e-16	0.0528163	0.313607	0.14441	0.00247768
X11557_3	E3 ubiquitin-protein ligase SMURF1	SMUF1	SMURF1	0	-0.0643914	0.536294	0.599745	0.570096	0.0633163	0.0647063	0.320051	-0.32611	2.06e-22	0.0829125	0.113305	0.173035	0.000278725
X9816_37	Isochorismatase domain-containing protein 1	ISOC1	ISOC1	0	0	0.547898	0.610456	0.569951	0.0751738	0.0282258	0.0448788	-0.339086	3.3e-24	0.143743	0.00587125	0.164683	0.000547461
X2731_29	NADPH--cytochrome P450 reductase	NADPH-P450 Oxidoreductase	POR	0	0	0.560838	0.600341	0.569895	0.103211	0.00255902	0.0587188	-0.104409	0.00236061	-0.252206	1.02e-06	-0.200306	2.46322e-05
X10339_48	Gamma-enolase	NSE	ENO2	0	-0.0388657	0.522546	0.59632	0.569835	0.0379083	0.269038	0.805661	-0.269034	1.71e-15	-0.0111455	0.831715	0.115842	0.0153995
X8249_124	ALK tyrosine kinase receptor	ALK	ALK	0	0	0.56488	0.596142	0.569642	0.119973	0.000449048	0.0150465	-0.232274	7.93e-12	-0.0443315	0.397762	0.0495357	0.301516
X14037_18	Ran-binding protein 3	RANB3	RANBP3	0	-0.0643914	0.512313	0.577102	0.569418	0.0121605	0.723006	0.652957	-0.248335	2.34e-13	0.19284	0.000206023	0.280279	2.48808e-09
X19194_9	D-tyrosyl-tRNA(Tyr) deacylase 1	Histidyl-tRNA synthetase-related	DTD1	0	-0.0643914	0.517089	0.584664	0.569165	0.0287121	0.40258	0.822766	-0.287699	1.38e-17	0.0789722	0.131551	0.195053	4.03769e-05
X14623_26	Small ubiquitin-related modifier 3	SUMO3	SUMO3	0	-0.0643914	0.529932	0.608215	0.569057	0.0470375	0.17015	0.768523	-0.29269	3.57e-18	0.108351	0.0382766	0.217239	4.58091e-06
X7066_199	Protein FAM209B	F209B	FAM209B	0	0	0.616264	0.58839	0.568938	0.204816	1.60262e-09	3.68966e-08	-0.165073	1.38e-06	0.01933	0.712446	0.074366	0.120594
X11457_53	UDP-glucose 4-epimerase	GALE	GALE	0	0	0.635812	0.586164	0.568789	-0.23395	4.68098e-12	4.53989e-10	0.00541261	0.875087	0.127756	0.0144534	0.248872	1.35821e-07
X13960_15	Arf-GAP with GTPase, ANK repeat and PH domain-containing protein 3	AGAP3	AGAP3	0	0	0.535657	0.599313	0.568729	0.0653378	0.0566002	0.358938	-0.286968	1.68e-17	-0.00518288	0.921284	0.197453	3.22691e-05
X11608_5	Microtubule-associated proteins 1A/1B light chain 3B	MLP3B	MAP1LC3B	0	-0.0643914	0.512194	0.590304	0.568662	0.0119657	0.727263	0.589772	-0.26064	1.33e-14	0.173146	0.00088006	0.273433	6.22082e-09
X25240_1	Protein-lysine N-methyltransferase EEF2KMT	EF2KT	EEF2KMT	0	0	0.596316	0.606763	0.568629	-0.170459	5.58941e-07	4.9232e-06	-0.0292553	0.39541	0.181643	0.000478978	0.16712	0.000451043
X12358_6	Immunoglobulin-binding protein 1	IGBP1	IGBP1	0	-0.0214538	0.545441	0.587649	0.56848	0.0794478	0.0203806	0.467153	-0.369369	9.66e-29	0.169584	0.00112652	0.358047	1.15593e-14
X13067_5	cGMP-dependent protein kinase 1, beta isozyme	KGP1B	PRKG1	0	0	0.573047	0.600322	0.568387	0.11968	0.000463879	0.0331105	-0.188284	3.43e-08	0.105919	0.0428544	0.24633	1.83573e-07
X10980_11	Acetylcholinesterase	ACES	ACHE	0	0	0.53621	0.592899	0.567899	0.0648358	0.05853	0.032575	-0.178853	1.63e-07	0.0506386	0.334004	0.0909208	0.0575449
X13116_25	CD177 antigen	CD177	CD177	0	0	0.516412	0.581406	0.567858	-0.0329789	0.336315	0.291926	0.0616161	0.0732573	0.104712	0.0452938	0.00631566	0.895262
X15322_35	Death domain-containing protein CRADD	CRADD	CRADD	0	0	0.637198	0.589876	0.567642	-0.240635	1.09151e-12	3.70085e-13	-0.0744771	0.0303071	0.191883	0.000221847	0.305457	6.85834e-11
X11681_8	Arf-GAP domain and FG repeat-containing protein 1	NUPL	AGFG1	0	-0.0214538	0.555081	0.610397	0.567631	0.0876044	0.0105199	0.10288	-0.326773	1.68e-22	0.231026	8e-06	0.303541	9.12764e-11
X5980_55	BolA-like protein 3	BOLA3	BOLA3	0	-0.0388657	0.518519	0.585498	0.567516	0.0348427	0.309705	0.614533	-0.263236	7.09e-15	0.124515	0.0171608	0.240919	3.44801e-07
X17490_4	SH3 domain-binding glutamic acid-rich-like protein 3	SH3BGRL3-like protein	SH3BGRL3	0	0	0.540104	0.58259	0.566671	0.058772	0.0864439	0.106028	-0.169292	7.32e-07	0.177423	0.000650168	0.100358	0.0359737
X10948_14	Phospholipase D3	PLD3	PLD3	0	-0.0388657	0.507907	0.580501	0.566619	0.0137526	0.688528	0.998159	-0.161418	2.37e-06	-0.130466	0.012486	-0.00371787	0.938227
X21153_5	Chromatin complexes subunit BAP18	BAP18	BAP18	0	0	0.588036	0.588833	0.566578	-0.15091	9.69691e-06	9.50061e-05	0.0412929	0.230223	0.0423597	0.419102	0.0971774	0.0423119
X17735_130	Gamma-aminobutyric acid receptor-associated protein	GBRAP	GABARAP	0	-0.0643914	0.531968	0.595103	0.566436	0.0520054	0.129321	0.548355	-0.286542	1.88e-17	0.0952238	0.0688134	0.228404	1.40047e-06
X11401_181	E3 ubiquitin-protein ligase RNF146	RN146	RNF146	0	0	0.674073	0.592124	0.566269	0.30475	9.06577e-20	1.292e-17	-0.221575	7.2e-11	-0.0560633	0.284742	0.024222	0.613578
X21499_17	5-demethoxyubiquinone hydroxylase, mitochondrial	COQ7	COQ7	0	0	0.584695	0.602504	0.565933	-0.137008	6.0157e-05	2.21701e-28	0.21875	1.27e-10	-0.134856	0.00979672	-0.0718676	0.133615
X23261_27	Uncharacterized protein C1orf50	CA050	C1orf50	0	0	0.581194	0.57109	0.565732	0.154434	5.9442e-06	2.13539e-06	0.00376903	0.912834	-0.206702	6.78e-05	-0.149332	0.00174596
X15527_90	Dihydrolipoyl dehydrogenase, mitochondrial	DLDH	DLD	0	0	0.514494	0.572564	0.565598	0.0189937	0.579823	0.460244	-0.115935	0.000728807	-0.0384981	0.462787	-0.025655	0.592748
X15321_8	Complexin-2	CPLX2	CPLX2	0	-0.0643914	0.519528	0.595151	0.565584	0.0319033	0.352322	0.883905	-0.240166	1.45e-12	0.0501111	0.339071	0.141588	0.00301401
X23617_15	Huntingtin-interacting protein K	HYPK	HYPK	0	0	0.570087	0.582784	0.565517	-0.120753	0.000411788	0.0113458	0.10002	0.00358897	0.0844363	0.106806	0.0783569	0.101873
X8004_15	Glyceraldehyde-3-phosphate dehydrogenase, testis-specific	G3PT	GAPDHS	0	0	0.519548	0.562426	0.565349	-0.0318732	0.352776	0.458806	0.063346	0.065532	0.0133496	0.799086	0.0485789	0.31096
X8274_64	Syntaxin-7	Syntaxin-7	STX7	0	-0.0643914	0.516062	0.579202	0.565282	0.021762	0.52585	0.890364	-0.276957	2.31e-16	0.20631	7e-05	0.342716	1.73042e-13
X22514_12	Protein naked cuticle homolog 2	NKD2	NKD2	0	0	0.604408	0.602459	0.565137	0.179959	1.23417e-07	4.10642e-05	-0.100036	0.00358354	-0.05982	0.253649	-0.0875167	0.0675849
X3844_2	Peptidyl-prolyl cis-trans isomerase A	Cyclophilin A	PPIA	0	0	0.53349	0.590773	0.564954	0.0557141	0.104138	0.442407	-0.315757	4.85e-21	0.127434	0.0147044	0.302183	1.11624e-10
X2864_2	Dual specificity mitogen-activated protein kinase kinase 1	MEK1	MAP2K1	0	0	0.605481	0.599853	0.564895	0.184272	6.05108e-08	5.32481e-06	-0.380768	1.41e-30	0.0953235	0.068522	0.184832	0.000101781
X17325_10	Guanylate kinase	KGUA	GUK1	0	0	0.554864	0.577527	0.564571	0.0880247	0.010153	0.343706	-0.354281	2.02e-26	0.274424	9.56e-08	0.400881	2.66518e-18
X2822_56	CD97 antigen	CD97	ADGRE5	0	0	0.597948	0.59074	0.564459	0.170005	5.99549e-07	5.19051e-09	-0.171113	5.54e-07	0.0126976	0.808705	0.028623	0.550668
X16899_59	Oxysterol-binding protein-related protein 9	OSBL9	OSBPL9	0	0	0.566729	0.575315	0.564444	0.113558	0.000898473	0.0143417	-0.0609031	0.0766512	-0.0435564	0.406072	-0.0421188	0.379758
X9765_4	Nuclear distribution protein nudE homolog 1	NDE1	NDE1	0	0	0.660669	0.602143	0.564284	-0.280172	7.85584e-17	4.59663e-17	0.0251017	0.465912	0.151599	0.00364732	0.218626	3.96676e-06
X25308_8	LIM domain kinase 1	LIMK1	LIMK1	0	0	0.58433	0.603658	0.564251	-0.147874	1.46549e-05	0.000477565	-0.078785	0.0219217	0.382347	3.47e-14	0.383396	9.45055e-17
X21736_60	Heparan sulfate 2-O-sulfotransferase 1	HS2ST	HS2ST1	0	-0.0388657	0.508164	0.586302	0.564135	0.0196052	0.56768	0.825022	-0.210534	6.25e-10	-0.00014258	0.997831	0.118371	0.0132823
X17404_5	ADP-ribosylation factor-like protein 5B	ARL5B	ARL5B	0	0	0.611788	0.611622	0.564031	-0.189565	2.46499e-08	0.000281512	0.0552997	0.107988	0.179972	0.000541022	0.214803	5.88463e-06
X17704_74	Heat shock protein 105 kDa	HS105	HSPH1	0	0	0.518588	0.606447	0.563841	0.0418476	0.222377	0.193129	-0.131837	0.000120186	-0.0560782	0.284614	-0.0587638	0.220209
X18302_204	Protein zwilch homolog	ZWILC	ZWILCH	0	0	0.569196	0.592318	0.563733	-0.120407	0.00042794	0.000272389	-0.044146	0.199576	0.150039	0.00401596	0.211137	8.53313e-06
X8019_73	Stathmin-3	STMN3	STMN3	0	-0.0643914	0.52276	0.596231	0.563424	0.0386531	0.259737	0.90778	-0.259275	1.84e-14	0.0931339	0.0751528	0.218557	3.99528e-06
X21655_18	LisH domain-containing protein FOPNL	FOPNL	CEP20	0	0	0.623473	0.601141	0.563179	-0.225926	2.53494e-11	1.31747e-59	0.00760185	0.82526	0.125444	0.016343	0.130956	0.00611513
X25233_2	Mannose-6-phosphate isomerase	MPI	MPI	0	0	0.534043	0.587635	0.563145	0.0594781	0.0827238	0.144511	-0.233984	5.52e-12	0.0511803	0.328853	0.068553	0.152531
X18233_10	Aspartate aminotransferase, mitochondrial	GOT2	GOT2	0	-0.0388657	0.517176	0.58007	0.563123	0.0259272	0.449765	0.963671	-0.170177	6.4e-07	-0.0205319	0.695431	0.0138113	0.773419
X19613_16	Retinol dehydrogenase 10	RDH10	RDH10	0	0	0.578911	0.593145	0.56303	-0.133595	9.17933e-05	4.655e-10	0.0635333	0.0647373	0.10134	0.0527326	0.0838477	0.0799697
X18280_29	Putative D-tyrosyl-tRNA(Tyr) deacylase 2	DTD2	DTD2	0	0	0.536626	0.570636	0.562769	0.0568709	0.0971336	0.203782	-0.288585	1.09e-17	0.0856915	0.101676	0.175587	0.000225362
X19273_3	Glutathione reductase, mitochondrial	Glutathione reductase	GSR	0	-0.0643914	0.530594	0.59125	0.562754	0.0464911	0.175172	0.367565	-0.288468	1.12e-17	0.104133	0.0465057	0.255245	6.28913e-08
X5487_7	SLAM family member 7	SLAF7	SLAMF7	0	0	0.546089	0.579556	0.562709	-0.0851702	0.012886	0.0472567	0.105255	0.00217337	0.103112	0.0487052	0.210375	9.21078e-06
X25285_14	Kelch repeat and BTB domain-containing protein 11	KBTBB	KBTBD11	-0.00782794	0	0.547848	0.600799	0.562568	0.0755148	0.0275162	0.192326	-0.369714	8.52e-29	0.160044	0.00213226	0.359325	9.16246e-15
X10990_21	Leucine-rich repeat serine/threonine-protein kinase 2	LRRK2	LRRK2	0	0	0.575599	0.591458	0.562501	-0.12949	0.000150587	0.0134989	0.0182555	0.595946	0.240669	3.21e-06	0.155973	0.00107075
X18833_76	Astrocytic phosphoprotein PEA-15	PEA15	PEA15	0	0	0.598127	0.622649	0.56227	0.17242	4.11966e-07	0.000149625	-0.418883	2.85e-37	0.118253	0.0236651	0.268018	1.26151e-08
X25085_37	Tether containing UBX domain for GLUT4	ASPC1	ASPSCR1	0	0	0.580734	0.586789	0.562266	0.138533	4.96481e-05	0.000104855	-0.119388	0.00050169	-0.0696274	0.183813	-0.147677	0.00196632
X12704_26	SH2 domain-containing protein 3C	SH2D3	SH2D3C	0	0	0.586708	0.570077	0.562207	-0.13856	4.94784e-05	0.00240286	0.0923712	0.00717752	-0.0298398	0.569328	0.0664501	0.165544
X25879_6	Histone acetyltransferase KAT5	KAT5	KAT5	0	0	0.538784	0.599492	0.56217	0.0757892	0.0269564	0.0552739	0.0353039	0.305055	-0.0649174	0.215345	-0.110833	0.0204807
X8405_108	Disintegrin and metalloproteinase domain-containing protein 10:Extracellular domain	ADAM 10:ECD	ADAM10	0	0	0.551366	0.583871	0.56214	-0.088666	0.00961501	0.0161013	0.0989249	0.00397486	0.0395754	0.450352	-0.0751841	0.116553
X25297_11	SH3 and PX domain-containing protein 2B	SPD2B	SH3PXD2B	0	0	0.555761	0.58262	0.562099	0.099737	0.00356575	0.0653721	-0.256031	3.96e-14	0.187357	0.000313292	0.249232	1.30114e-07
X20956_13	Prefoldin subunit 4	PFD4	PFDN4	0	0	0.55715	0.610523	0.561808	0.0976675	0.00432461	0.00529186	-0.310801	2.11e-20	0.143031	0.00612367	0.193112	4.83075e-05
X25114_256	TBC1 domain family member 24	TBC24	TBC1D24	0	0	0.621295	0.58132	0.561756	-0.207611	9.48416e-10	1.75862e-06	-0.0413971	0.229048	0.181206	0.000494551	0.303101	9.74319e-11
X7721_81	Fragile X mental retardation protein 1	FMR1	FMR1	0	0	0.620661	0.579928	0.561741	-0.207747	9.24382e-10	1.03262e-09	0.0183955	0.593129	0.129303	0.0132994	0.0973237	0.0420011
X12522_6	UV excision repair protein RAD23 homolog B	RD23B	RAD23B	0	-0.0643914	0.518802	0.576875	0.561615	0.0329201	0.337179	0.817297	-0.297935	8.38e-19	0.130702	0.0123259	0.288776	7.70084e-10
X19238_12	Glutamine synthetase	GLNA	GLUL	0	-0.0388657	0.52613	0.606532	0.561566	0.0438078	0.201445	0.608019	-0.321833	7.71e-22	0.0932399	0.07482	0.291254	5.4299e-10
X5002_76	Matrix metalloproteinase-14	MMP-14	MMP14	0	0	0.607839	0.606886	0.561563	-0.207893	8.99209e-10	6.30525e-12	-0.0551305	0.109072	0.215878	3.11e-05	0.310305	3.29777e-11
X4696_2	Fatty acid-binding protein, heart	FABP	FABP3	0	0	0.516132	0.584347	0.561555	0.02336	0.495905	0.371136	-0.289294	8.99e-18	0.182771	0.000440909	0.335905	5.49508e-13
X25118_45	Protein bicaudal D homolog 1	BICD1	BICD1	0	0	0.574621	0.586365	0.561429	-0.133387	9.41501e-05	0.00384936	-0.0562461	0.102079	0.165307	0.00150586	0.267375	1.37061e-08
X14631_22	Dual specificity protein phosphatase 16	DUS16	DUSP16	0	0	0.558825	0.5645	0.561421	-0.103065	0.00259548	0.00645604	0.0163253	0.63538	0.114974	0.0278526	0.161419	0.00070671
X15305_7	Secretagogin	Secretagogin	SCGN	0	0	0.519329	0.588766	0.561365	0.0275362	0.422132	0.179759	-0.166571	1.11e-06	0.283802	3.3e-08	0.286349	1.08089e-09
X9577_26	Synaptotagmin-2	SYT2	SYT2	0	0	0.555868	0.568603	0.561172	-0.0958442	0.0051112	0.109242	0.00280997	0.934957	0.100019	0.0559105	0.122548	0.0103433
X19356_20	TOM1-like protein 2	TM1L2	TOM1L2	0	0	0.57029	0.569951	0.560893	0.127659	0.000186911	0.000492968	-0.0570504	0.097263	-0.103752	0.0473166	-0.0389952	0.416131
X8038_41	Sterol-4-alpha-carboxylate 3-dehydrogenase, decarboxylating	NSDHL	NSDHL	0	0	0.610995	0.591346	0.560524	-0.197536	6.07057e-09	6.19289e-07	0.109245	0.00146097	0.0101917	0.845928	-0.00662819	0.890111
X11607_15	Bromodomain-containing protein 1	BRD1	BRD1	0	0	0.561466	0.577646	0.560509	-0.101325	0.00306779	0.0810754	0.0957756	0.00530296	-0.0312756	0.550884	-0.109458	0.0221088
X19802_22	Receptor-binding cancer antigen expressed on SiSo cells	RCAS1	EBAG9	0	0.0127848	0.554314	0.564385	0.560461	-0.0868615	0.0111974	0.0545831	-0.135453	7.74e-05	0.155909	0.00278234	0.212214	7.65583e-06
X23593_14	Protein MB21D2	M21D2	MB21D2	0	0	0.58205	0.571656	0.560074	-0.141383	3.44893e-05	7.26453e-06	0.189532	2.78e-08	-0.0622759	0.234642	-0.0547334	0.253556
X3216_2	Polymeric immunoglobulin receptor	PIGR	PIGR	0	0	0.518712	0.575989	0.56004	0.0273831	0.424717	0.920989	-0.201027	3.66e-09	0.0408872	0.435469	0.0412744	0.389394
X8889_5	Cell cycle progression protein 1	CCPG1	CCPG1	0	0	0.542589	0.57272	0.560018	0.0765796	0.0253986	0.421042	-0.219387	1.12e-10	0.0395223	0.450961	0.179353	0.0001638
X11402_17	Histone-lysine N-methyltransferase 2C	KMT2C	KMT2C	0	0	0.584145	0.583789	0.559679	-0.143329	2.67884e-05	2.27575e-28	0.0348328	0.311558	0.064315	0.219642	0.2084	1.12131e-05
X17467_1	Dehydrogenase/reductase SDR family member 9	DHRS9	DHRS9	0	0	0.652563	0.597378	0.559336	-0.277525	1.56511e-16	2.45498e-85	-0.0399651	0.245571	0.276196	7.84e-08	0.376561	3.60145e-16
X22479_64	Inositol hexakisphosphate kinase 2	IP6K2	IP6K2	0	0	0.590521	0.593111	0.559295	-0.153033	7.2306e-06	3.4643e-05	0.00305013	0.929411	0.0712912	0.17353	0.115949	0.0153039
X13062_4	Glia maturation factor gamma	GMFG	GMFG	0	0	0.515981	0.581127	0.559147	0.0288795	0.399842	0.401251	-0.234619	4.82e-12	-0.0232006	0.658203	0.12676	0.00797848
X18235_16	Glycerol-3-phosphate phosphatase	PGP	PGP	0	0	0.531653	0.591734	0.558919	0.0511254	0.135939	0.632633	-0.24343	7.06e-13	0.0559942	0.285337	0.182195	0.000128201
X25463_3	cAMP-dependent protein kinase type II-beta regulatory subunit	KAP3	PRKAR2B	0	0	0.513056	0.565866	0.558893	0.0183656	0.592421	0.957367	-0.26052	1.36e-14	0.226474	1.22e-05	0.345182	1.13096e-13
X9266_1	Triggering receptor expressed on myeloid cells 1	sTREM-1	TREM1	0	0	0.571647	0.572966	0.558677	0.113506	0.000903372	0.1239	-0.268895	1.77e-15	0.355624	2.37e-12	0.431172	3.27245e-21
X9107_59	Armadillo repeat-containing protein 10	ARM10	ARMC10	0	0	0.542424	0.567814	0.558618	-0.0717349	0.036305	0.326795	-0.0592849	0.0848284	0.117232	0.024907	0.116119	0.0151541
X16754_40	Peripheral plasma membrane protein CASK	CSKP	CASK	0	0	0.555177	0.563622	0.558357	0.0958822	0.00509357	0.0214393	-0.158031	3.86e-06	0.10095	0.0536554	0.179448	0.000162465
X7249_307	Bcl-2-like protein 10	B2L10	BCL2L10	0	0	0.529064	0.577627	0.558331	0.0501275	0.143757	0.00231262	-0.0361328	0.293834	0.003407	0.948208	-0.0501808	0.295256
X15635_4	SPARC-related modular calcium-binding protein 2	SMOC2	SMOC2	0	0	0.536846	0.5852	0.558275	0.0685341	0.0455155	0.529152	-0.317745	2.67e-21	0.220551	2.07e-05	0.427351	7.91644e-21
X3859_50	Proteasome subunit alpha type-1	PSA1	PSMA1	0	0	0.559603	0.583774	0.558134	0.108033	0.00158851	0.0147081	-0.0887111	0.00983622	0.0214919	0.681948	-0.160265	0.000772619
X2948_58	Growth hormone receptor	Growth hormone receptor	GHR	0	0	0.528271	0.586957	0.558115	-0.0594238	0.0830055	0.23358	0.169265	7.35e-07	-0.0409689	0.434551	-0.0416839	0.384702
X13723_6	Interleukin-10	IL-10	IL10	0	0	0.660313	0.597083	0.557899	-0.264915	3.77594e-15	3.03931e-13	0.10293	0.00272312	0.0293094	0.576214	0.116852	0.0145206
X18220_141	Steroid receptor RNA activator 1	SRA1	SRA1	0	0	0.508332	0.587575	0.55784	0.0250187	0.46581	0.0436762	-0.089001	0.00959746	-0.123092	0.0184825	-0.0157719	0.742322
X6558_5	Collectin-10	COL10	COLEC10	0	0	0.626117	0.590743	0.557713	-0.200058	3.84879e-09	2.08671e-13	0.077341	0.024475	0.0557443	0.287496	0.0542189	0.258052
X18342_2	Phosphoserine aminotransferase	SERC	PSAT1	0	-0.0643914	0.533273	0.582676	0.557713	0.049155	0.151701	0.153479	-0.253031	7.98e-14	0.0999014	0.0562017	0.172848	0.000283076
X25499_37	Phospholipase DDHD2	DDHD2	DDHD2	0	0	0.617846	0.600643	0.55759	0.201729	2.83631e-09	2.42755e-06	-0.230285	1.21e-11	-0.0330364	0.528673	0.0316672	0.509089
X7100_31	T-cell surface antigen CD2	CD2	CD2	0	0	0.541594	0.553045	0.557494	0.0735774	0.0317605	0.18197	-0.0295567	0.390559	-0.0266681	0.611077	-0.104844	0.028417
X16606_85	Aldose reductase	Aldose reductase	AKR1B1	0	0	0.514555	0.582046	0.55717	0.0171737	0.616664	0.527139	-0.241943	9.82e-13	0.238812	3.83e-06	0.335951	5.45271e-13
X20966_7	Sentrin-specific protease 8	SENP8	SENP8	0	0	0.542438	0.595267	0.557121	0.0742349	0.0302611	0.0808281	-0.117805	0.000596104	-0.0501881	0.338328	0.00696331	0.884593
X19277_4	Thiosulfate sulfurtransferase/rhodanese-like domain-containing protein 1	KAT	TSTD1	-0.00645929	0	0.547519	0.588733	0.556976	0.0874072	0.0106961	0.194472	-0.264174	5.65e-15	0.0965956	0.0648951	0.0773574	0.10633
X9808_41	Trinucleotide repeat-containing gene 6B protein	TNR6B	TNRC6B	0	0	0.530366	0.590784	0.556768	0.0475311	0.165706	0.274498	-0.19823	6.06e-09	0.12952	0.0131442	0.169448	0.000373896
X12655_30	Beta-soluble NSF attachment protein	SNAB	NAPB	0	0	0.566471	0.59689	0.556675	0.123536	0.000300979	0.000112471	-0.166659	1.09e-06	-0.113598	0.0297901	-0.0811717	0.0901142
X21154_8	Calcium-binding protein 39-like	CB39L	CAB39L	0	0	0.540352	0.570848	0.556634	0.0668465	0.0511161	0.450363	-0.31147	1.73e-20	0.129486	0.0131684	0.311352	2.81009e-11
X5476_66	Protein kinase C gamma type	PKC-G	PRKCG	0	-0.0643914	0.537231	0.598703	0.556593	0.0659727	0.0542358	0.524212	-0.307876	4.95e-20	-0.0162414	0.756809	0.126655	0.0080309
X15487_164	Liver carboxylesterase 1	carboxylesterase, liver	CES1	0	0	0.616672	0.592415	0.556507	-0.198702	4.92031e-09	1.78466e-10	0.0556488	0.105778	0.0904433	0.084005	0.100939	0.0349068
X6919_3	Hemoglobin subunit zeta	HBAZ	HBZ	0	0	0.606824	0.583346	0.556425	-0.184111	6.21673e-08	4.09077e-07	0.038243	0.266525	0.128395	0.0139663	0.244948	2.15944e-07
X24013_6	Metabotropic glutamate receptor 4	GRM4	GRM4	0	0	0.586048	0.586655	0.556406	0.141197	3.53273e-05	0.000714199	-0.101229	0.00320265	-0.0750848	0.151696	-0.106408	0.0261237
X24318_13	FYVE, RhoGEF and PH domain-containing protein 2	FGD2	FGD2	0	0	0.619501	0.57979	0.556392	-0.205038	1.53756e-09	3.40981e-26	0.162383	2.06e-06	0.0716762	0.171213	0.0456468	0.341102
X12417_46	EKC/KEOPS complex subunit TPRKB	TPRKB	TPRKB	0	0	0.519618	0.572121	0.556183	0.0245397	0.474396	0.764742	-0.0391011	0.255935	0.000547188	0.991676	0.088275	0.0652322
X24938_7	AP-2 complex subunit beta-1	AP2B1	AP2B1	0	-0.0643914	0.500237	0.563104	0.556157	0.00043276	0.989936	0.953197	-0.213087	3.83e-10	0.0181836	0.728809	0.123429	0.00980261
X8262_20	Apolipoprotein D	Apo D	APOD	0	0	0.634143	0.623032	0.556146	-0.237799	2.03537e-12	3.0033e-11	-0.0539962	0.116564	0.188309	0.000291543	0.240881	3.46313e-07
X17495_141	NAD-dependent protein deacetylase sirtuin-3, mitochondrial	SIR3	SIRT3	0	0	0.512732	0.555193	0.555982	-0.0232564	0.497819	0.88539	-0.008974	0.794372	0.17396	0.000831222	0.125582	0.00858589
X25481_66	Ataxin-10	ATX10	ATXN10	0	0	0.616935	0.591842	0.555975	-0.19158	1.73933e-08	2.2536e-07	0.0550025	0.109898	-0.01731	0.741361	0.0421803	0.379062
X11319_106	Double-strand break repair protein MRE11	MRE11	MRE11	0	0	0.506087	0.551276	0.555975	-0.00559118	0.870548	0.7854	0.0521806	0.129388	-0.0628823	0.230107	-0.073373	0.125645
X20390_4	High mobility group nucleosome-binding domain-containing protein 3	HMGN3	HMGN3	0	0	0.548083	0.548975	0.555949	-0.0898152	0.00871406	0.0100379	0.0109035	0.751487	0.139898	0.00735258	0.140952	0.00314852
X23903_3	Aspartate aminotransferase, mitochondrial	GOT2	GOT2	0	-0.0388657	0.517058	0.579321	0.555882	0.0266085	0.437942	0.895358	-0.179755	1.41e-07	-0.0271548	0.604584	0.0186509	0.69742
X15318_75	Protein S100-A10	Calpactin I light chain	S100A10	0	0	0.505037	0.570237	0.555796	-0.016	0.640951	0.36086	0.163113	1.85e-06	-0.120481	0.0211412	-0.201943	2.1061e-05
X21357_12	Filamin-binding LIM protein 1	FBLI1	FBLIM1	0	0	0.639828	0.576287	0.555628	-0.240912	1.02652e-12	2.59397e-12	-0.00535281	0.876456	0.133428	0.0106087	0.225144	1.99205e-06
X11348_132	Prolyl 4-hydroxylase subunit alpha-2	P4HA2	P4HA2	0	0	0.532674	0.56252	0.555621	0.0482196	0.159654	0.417538	-0.160659	2.65e-06	0.183858	0.000406917	0.211871	7.92503e-06
X8474_6	Inactive tyrosine-protein kinase transmembrane receptor ROR1	ROR1	ROR1	0	-0.0388657	0.531595	0.54526	0.555587	-0.0569192	0.0968495	0.415968	-0.0688227	0.0453712	0.0167252	0.749802	0.152416	0.00139471
X9851_9	Fatty acid-binding protein, adipocyte	FABPA	FABP4	0	0	0.527452	0.566931	0.555546	-0.0473881	0.166984	0.288194	-0.0086856	0.800839	0.262486	3.5e-07	0.184404	0.000105691
X9094_5	C-type lectin domain family 4 member C	CLC4C	CLEC4C	0	0	0.516592	0.582314	0.555442	-0.0212718	0.535218	0.131364	-0.0162095	0.63778	-0.007594	0.884879	0.00894681	0.852055
X17686_27	Tubulin-folding cofactor B	TBCB	TBCB	0	-0.0388657	0.517931	0.57753	0.555438	0.0249524	0.466993	0.691931	-0.287973	1.28e-17	0.194299	0.000183909	0.305711	6.6023e-11
X19112_2	Transcription elongation factor A protein-like 3	TCAL3	TCEAL3	0	0	0.576227	0.637768	0.555331	0.134524	8.19022e-05	0.00209378	-0.32861	9.44e-23	0.180892	0.00050599	0.235218	6.59332e-07
X9951_36	F-box/LRR-repeat protein 4:Leucine-rich repeats 2 and 3	FBXL4:LRR2 and LRR3	FBXL4	0	0	0.559293	0.578551	0.555286	-0.115782	0.000709225	1.47887e-38	0.0337027	0.327527	0.119258	0.0224962	0.0907875	0.0579134
X9826_135	Bis(5'-adenosyl)-triphosphatase	Fragile histidine triad protein	FHIT	0	-0.0388657	0.520075	0.590818	0.555129	0.0267624	0.435296	0.452231	-0.258052	2.46e-14	0.133776	0.0104055	0.180884	0.000143605
X18284_77	Protein KIBRA	WWC1	WWC1	0	-0.0643914	0.539563	0.610028	0.554884	0.0648694	0.0583993	0.554285	-0.277109	2.22e-16	0.0524832	0.316673	0.0892442	0.0623235
X14125_5	Apolipoprotein M	ApoM	APOM	0	0	0.547576	0.57679	0.554791	-0.088796	0.00950903	0.00341794	0.0179864	0.601376	0.15394	0.00315123	0.204822	1.59399e-05
X10479_18	Stromelysin-2	MMP-10	MMP10	0	0	0.58562	0.601521	0.554757	0.14574	1.94964e-05	7.26047e-05	-0.227637	2.09e-11	0.0697069	0.183311	0.23328	8.18768e-07
X8300_82	Peroxisomal membrane protein PEX14:N-term	PEX14:N-term	PEX14	0	-0.0643914	0.551372	0.611975	0.554694	0.0943929	0.00582719	0.0387227	-0.314111	7.92e-21	-0.0271014	0.605295	0.0798787	0.095373
X25049_8	Nonspecific lipid-transfer protein:isoform SCPx	NLTP:isoform SCPx	SCP2	0	0	0.585855	0.565822	0.554441	-0.147302	1.58268e-05	0.000659753	-0.0938251	0.00631431	0.225192	1.36e-05	0.258681	4.11652e-08
X22966_20	Gamma-aminobutyric acid receptor-associated protein	GBRAP	GABARAP	0	-0.0643914	0.524886	0.580766	0.554415	0.0343357	0.316803	0.648598	-0.267839	2.3e-15	0.192704	0.000208192	0.313068	2.15932e-11
X18319_7	Pyruvate dehydrogenase protein X component, mitochondrial	ODPX	PDHX	0	0	0.502586	0.561343	0.554333	0.00704669	0.83727	0.534286	-0.138172	5.52e-05	-0.0133138	0.799613	-0.0273277	0.568852
X4468_21	Sphingosine kinase 2	SPHK2	SPHK2	0	0	0.517656	0.54252	0.554314	-0.0240862	0.482602	0.794211	0.0128115	0.709818	0.0854181	0.102777	-0.0112849	0.814024
X15534_26	Malate dehydrogenase, mitochondrial	Malate dehydrogenase 2	MDH2	0	-0.0388657	0.507392	0.584451	0.554281	0.0106002	0.75735	0.842743	-0.19249	1.67e-08	-0.0292295	0.577254	0.0617684	0.197477
X5496_49	Spondin-1	Spondin-1	SPON1	0	-0.0388657	0.507386	0.602121	0.554221	0.0182772	0.594204	0.828536	-0.234701	4.74e-12	-0.0162531	0.75664	0.16498	0.000534772
X19357_11	Vesicle-associated membrane protein 7	VAMP7	VAMP7	0	0	0.534292	0.571648	0.554214	0.0609041	0.075606	0.3501	-0.0321124	0.35088	-0.127906	0.0143381	0.0650015	0.174981
X17836_17	Protein S100-A16	S100A16	S100A16	0	0	0.502395	0.565509	0.554158	-0.00483474	0.887937	0.290377	-0.186332	4.77e-08	0.14494	0.0054683	0.217755	4.34262e-06
X20912_10	Pseudouridine-5'-phosphatase	HDHD1	PUDP	0	0	0.540627	0.579898	0.554087	0.0689834	0.0441146	0.105139	-0.187657	3.82e-08	0.0832164	0.111985	0.0995496	0.0375027
X11279_42	Gamma-aminobutyric acid type B receptor subunit 1	GABR1	GABBR1	0	-0.0643914	0.503639	0.56902	0.554024	0.00348827	0.919018	0.968192	-0.24708	3.12e-13	0.0715682	0.171861	0.199088	2.76554e-05
X14619_8	Zinc finger protein 526	ZN526	ZNF526	0	0	0.524258	0.568823	0.554013	-0.0374725	0.274585	0.901532	-0.000863718	0.979987	0.0620154	0.236608	0.154029	0.00123797
X8887_21	Nuclear migration protein nudC:CS domain	NUDC:CS	NUDC	0	-0.0214538	0.530016	0.595646	0.553923	0.0471059	0.169529	0.396906	-0.270342	1.23e-15	0.218847	2.4e-05	0.319955	7.37204e-12
X21747_114	UBE2N (Ubc13)/Uev1a Complex	UBE2N/UB2V1 Complex	UBE2N|UBE2V1	0	-0.0643914	0.513635	0.574452	0.55383	0.0203656	0.552752	0.892332	-0.268419	1.99e-15	0.130092	0.0127425	0.236384	5.78214e-07
X11546_7	Cytoglobin	CYGB	CYGB	0	0	0.515301	0.547866	0.553812	0.0215883	0.52916	0.535193	-0.151471	9.66e-06	0.0996674	0.0567837	0.120515	0.0116928
X4435_66	Ectonucleotide pyrophosphatase/phosphodiesterase family member 7	ENPP7	ENPP7	0	0	0.51982	0.560405	0.553745	-0.0467955	0.17236	0.261275	0.0698667	0.0421914	0.0806557	0.123495	0.0545729	0.254952
X7761_125	Choline/ethanolamine kinase	CHKB	CHKB	0	0	0.526706	0.587757	0.553689	0.0454229	0.185308	0.586889	-0.28398	3.71e-17	0.266623	2.25e-07	0.337137	4.46816e-13
X16015_19	Alanine aminotransferase 1	ALT	GPT	0	0	0.589054	0.583361	0.553611	0.161351	2.20325e-06	1.68837e-05	-0.0781066	0.0230909	-0.108191	0.0385639	-0.0840627	0.0791966
X18323_39	Dihydropyrimidinase-related protein 1	DRP-1	CRMP1	0	0	0.559907	0.599369	0.553517	0.10691	0.00177811	0.000226018	-0.124015	0.000299502	0.0404449	0.440455	0.087723	0.0669379
X12387_7	PDZ and LIM domain protein 4	PDLI4	PDLIM4	-0.0214538	0	0.516676	0.570088	0.553369	0.0254747	0.457717	0.456567	-0.373658	2.01e-29	0.348494	6.86e-12	0.457211	5.8478e-24
X14066_49	Membrane-associated guanylate kinase, WW and PDZ domain-containing protein 2	MAGI2	MAGI2	0	-0.0643914	0.520003	0.591328	0.553235	0.0331927	0.333191	0.889652	-0.271745	8.68e-16	0.0768783	0.142128	0.170931	0.000331378
X8039_41	Protein FAM177A1	F177A	FAM177A1	0	0.0158498	0.593617	0.572858	0.553141	-0.178159	1.65351e-07	2.09757e-08	-0.05766	0.0937345	0.182954	0.000434996	0.188311	7.47069e-05
X16536_3	High mobility group protein HMG-I/HMG-Y	HMGA1	HMGA1	0	0	0.504363	0.565881	0.5531	-0.0101742	0.766813	0.00651027	-0.0332465	0.334121	0.140247	0.00720548	0.197096	3.33693e-05
X20442_12	Calcipressin-3	RCAN3	RCAN3	0	0	0.522462	0.56791	0.553052	-0.0466998	0.173241	0.436385	-0.00269665	0.937574	0.315932	6.31e-10	0.246332	1.83526e-07
X9518_95	Phospholipase A1 member A	PLA1A	PLA1A	0	0	0.550325	0.538693	0.553007	0.083192	0.015143	0.320055	-0.00913284	0.790816	-0.111159	0.0335105	-0.140872	0.00316584
X24428_76	Lysophospholipase D GDPD1	GDPD1	GDPD1	0	0	0.591508	0.601257	0.552974	-0.161114	2.2813e-06	0.000153749	-0.0574241	0.0950875	0.226027	1.27e-05	0.225167	1.98724e-06
X2967_8	Vascular cell adhesion protein 1	VCAM-1	VCAM1	0	0	0.510175	0.557278	0.552966	-0.0199466	0.560954	0.860606	-0.0675082	0.0496596	0.15515	0.00291962	0.188879	7.09924e-05
X21111_49	Hsp70-binding protein 1	HPBP1	HSPBP1	0	0	0.518218	0.562948	0.552959	0.0303805	0.37579	0.974475	-0.168434	8.35e-07	0.116586	0.0257202	0.142008	0.00292789
X9064_12	RING finger protein 215:Cytoplasmic domain	RN215:CD	RNF215	0	0	0.546367	0.585047	0.552873	0.0781508	0.0225314	3.4394e-06	0.0277475	0.420227	-0.0486173	0.353682	0.0131141	0.784569
X12644_63	Adenylosuccinate synthetase isozyme 2	PURA2	ADSS2	0	0	0.554942	0.533	0.552858	0.0991755	0.00375868	0.0338245	-0.012749	0.711171	-0.109254	0.0366843	-0.140137	0.00332902
X12677_164	Protein flightless-1 homolog	FLII	FLII	0	0	0.525199	0.585654	0.552791	0.0457177	0.182469	0.761556	-0.192154	1.77e-08	0.13437	0.0100662	0.136084	0.00437342
X2575_5	Leptin	Leptin	LEP	0	0	0.50495	0.568923	0.552616	-0.00108977	0.974661	0.26437	0.0840842	0.0144292	-0.131994	0.0114836	-0.117522	0.0139622
X12703_6	Serine/threonine-protein kinase Nek7	NEK7	NEK7	0	0	0.505911	0.572698	0.552509	-0.00925932	0.787253	0.121803	0.100794	0.00333708	-0.00834964	0.873516	-0.105652	0.0272115
X22381_1	Endoribonuclease LACTB2	LACB2	LACTB2	0	-0.0214538	0.512003	0.56112	0.552509	0.0103457	0.762998	0.730432	-0.275772	3.13e-16	0.309809	1.39e-09	0.42358	1.87241e-20
X9333_59	Endoplasmic reticulum resident protein 27	ERP27	ERP27	0	0	0.540069	0.540413	0.552382	-0.0669021	0.0509229	0.533937	0.0203355	0.554744	-0.0125932	0.810247	0.0642849	0.179796
X11563_51	Synaptotagmin-like protein 4:Ca2+-dependent membrane-targeting module 2	SYTL4:C2 2	SYTL4	0	0	0.58153	0.551541	0.552129	-0.140021	4.1084e-05	0.00310167	-0.000103468	0.997602	0.0962515	0.0658602	0.099085	0.0384064
X20434_23	Purkinje cell protein 4-like protein 1	PC4L1	PCP4L1	0	0	0.512469	0.563938	0.552106	0.0285121	0.405867	0.351935	-0.18292	8.42e-08	0.00641459	0.902662	0.0808842	0.0912631
X21756_5	UBE2N/UBE2V2 Complex	UBE2N/UBE2V2 Complex	UBE2N|UBE2V2	0	-0.0643914	0.505879	0.580691	0.552062	0.00897166	0.793711	0.940085	-0.332776	2.53e-23	0.173006	0.000888702	0.353065	2.83049e-14
X6496_60	Protein delta homolog 1:Extracellular domain	DLK1:ECD	DLK1	0	0	0.521226	0.544493	0.552054	-0.0421864	0.218652	0.378362	-0.0757698	0.0275415	0.157563	0.00250326	0.225714	1.87385e-06
X22955_28	Retinol-binding protein 1	CRBP	RBP1	0	0	0.506428	0.57428	0.551946	0.00597907	0.861654	0.965857	-0.211534	5.16e-10	0.0779451	0.136661	0.23686	5.47964e-07
X14070_56	Intersectin-1	ITSN1	ITSN1	0	-0.0388657	0.533545	0.581935	0.55192	0.0609421	0.0754232	0.443546	-0.301171	3.38e-19	0.0677855	0.195712	0.161587	0.000697578
X9719_145	Matrix metalloproteinase-16	MMP-16	MMP16	0	-0.0388657	0.526284	0.598022	0.551887	0.0461616	0.178253	0.902971	-0.212634	4.18e-10	-0.0930746	0.0753393	-0.0162569	0.734692
X15614_168	Leukocyte immunoglobulin-like receptor subfamily A member 2	LIRA2	LILRA2	0	0	0.51141	0.558011	0.55176	0.0057834	0.866138	0.169517	-0.166044	1.2e-06	0.122858	0.0187084	0.253319	7.9543e-08
X19219_71	Nuclear transport factor 2	NTF-2	NUTF2	0	0	0.523882	0.581011	0.551712	0.0440961	0.198492	0.606294	-0.123689	0.00031077	-0.252018	1.04e-06	-0.187172	8.27184e-05
X12460_18	Proteasome subunit alpha type-7	PSA7	PSMA7	0	0	0.504415	0.580617	0.551697	0.0118573	0.729639	0.867111	-0.267009	2.82e-15	0.126932	0.0151036	0.30596	6.3612e-11
X21863_11	Cytosolic Fe-S cluster assembly factor NUBP2	NUBP2	NUBP2	0	0	0.505153	0.55641	0.551693	-0.00207058	0.951877	0.236911	-0.0770776	0.0249674	0.216565	2.93e-05	0.200974	2.31105e-05
X3905_62	Ubiquitin-conjugating enzyme E2 N	UBE2N	UBE2N	0	-0.0643914	0.514173	0.589176	0.551593	0.0229272	0.503924	0.892077	-0.345864	3.52e-25	0.163857	0.00165902	0.336398	5.05958e-13
X12560_9	5'(3')-deoxyribonucleotidase, cytosolic type	NT5C	NT5C	0	0	0.508974	0.555483	0.551537	0.0153298	0.654996	0.937481	-0.177032	2.19e-07	0.128408	0.0139567	0.168401	0.000406924
X9284_25	Secreted frizzled-related protein 4	SFRP4	SFRP4	0	0	0.511161	0.558867	0.551503	-0.0198983	0.561902	0.456655	0.0650962	0.0584111	0.00217961	0.966853	-0.00538422	0.910639
X16859_100	Endophilin-B1	SHLB1	SH3GLB1	0	0	0.58499	0.581272	0.551459	-0.139215	4.55322e-05	9.3895e-05	-0.0736083	0.0322969	0.0706449	0.177472	0.267621	1.32773e-08
X21328_2	Synaptotagmin-1	SYT1	SYT1	0	-0.0643914	0.514833	0.576682	0.551008	0.0229112	0.504221	0.940277	-0.256254	3.76e-14	0.0513008	0.327713	0.129228	0.00682926
X19243_2	Prefoldin subunit 2	PFD2	PFDN2	0	0	0.542563	0.620132	0.550986	0.0712032	0.037715	0.0788691	-0.254663	5.46e-14	0.145027	0.00543995	0.192302	5.20337e-05
X18289_16	C-C motif chemokine 15	MIP-5	CCL15	0	0	0.504091	0.566242	0.550833	-0.00737665	0.829764	0.852399	-0.109883	0.00136928	0.445966	2.75e-19	0.519307	1.50852e-31
X13615_60	Cytoplasmic protein NCK2	NCK2	NCK2	0	0	0.52195	0.580252	0.550826	0.0422299	0.218177	0.634939	-0.29072	6.11e-18	0.2315	7.65e-06	0.312055	2.52316e-11
X12683_156	Dihydropyrimidinase-related protein 5	DPYL5	DPYSL5	0	0	0.522207	0.576492	0.550792	0.0295168	0.389518	0.893453	-0.0614368	0.0740992	-0.0208157	0.691435	0.0643728	0.1792
X7898_29	Nuclear protein MDM1	MDM1	MDM1	0	0	0.525413	0.572888	0.550707	0.0458085	0.1816	0.947876	-0.206018	1.46e-09	-0.031432	0.548892	0.146494	0.00213915
X21895_36	Interferon lambda-4	IFNL4	None	0	0	0.544993	0.564612	0.550692	-0.0688237	0.0446081	0.206216	0.178332	1.78e-07	-0.188751	0.000281935	-0.277859	3.44985e-09
X8980_19	Cell surface glycoprotein CD200 receptor 2	MO2R2	CD200R1L	0	0	0.531558	0.552147	0.550658	-0.06166	0.0720401	7.02283e-13	0.0305216	0.375268	0.0797242	0.127904	0.144241	0.00250718
X25291_27	Pleckstrin homology domain-containing family M member 2	PKHM2	PLEKHM2	0	0	0.619446	0.574053	0.550424	-0.186784	3.96393e-08	1.9341e-11	0.0230512	0.503134	0.0530853	0.311146	0.151884	0.00145027
X17784_23	Glia maturation factor beta	GMFB	GMFB	0	0	0.527536	0.564783	0.550383	0.0488204	0.154511	0.532344	-0.266131	3.5e-15	0.00744461	0.887129	0.138775	0.00365148
X23258_56	Cytochrome c oxidase assembly factor 7	COA7	COA7	0	0	0.601853	0.60122	0.550379	-0.181144	1.01649e-07	3.16e-06	-0.0252675	0.462971	0.207938	6.11e-05	0.345005	1.16616e-13
X13946_8	Probable ATP-dependent RNA helicase DDX23	DDX23	DDX23	0	0	0.561252	0.564444	0.550331	0.109965	0.00130529	0.0358877	0.0220239	0.522356	-0.216521	2.94e-05	-0.248546	1.41201e-07
X11616_9	Heat shock factor protein 1	HSF1	HSF1	0	0	0.501232	0.530711	0.55023	0.00299041	0.930545	0.179387	0.0891812	0.00945171	-0.0724326	0.166728	-0.247098	1.67664e-07
X24226_30	Fascin	Fascin	FSCN1	0	0	0.518779	0.587169	0.550163	0.0348672	0.309365	0.649623	-0.160392	2.75e-06	-0.200253	0.000114744	-0.0852239	0.0751246
X23226_42	ATP synthase B chain, mitochondrial	AT5F1	ATP5PB	0	0	0.517303	0.551295	0.549996	-0.0305476	0.373168	0.854355	-0.0790471	0.0214839	0.174772	0.000784987	0.195619	3.83072e-05
X6433_57	Pseudokinase FAM20A	FA20A	FAM20A	0	0	0.558723	0.562501	0.549713	-0.105892	0.00196781	6.15209e-31	0.0132651	0.700033	0.158243	0.00239617	0.160689	0.000747759
X11593_21	C-X-C motif chemokine 9	MIG	CXCL9	0	0	0.514309	0.55141	0.549687	0.0204594	0.550924	0.256314	0.0425481	0.216351	-0.0471381	0.368535	-0.15654	0.00102606
X21933_7	Ubiquitin-like modifier-activating enzyme 7	UBA7	UBA7	0	0	0.520839	0.541749	0.549519	-0.0377977	0.270439	0.386285	0.145157	2.25e-05	-0.0726858	0.165246	-0.135724	0.00447927
X18218_48	CB1 cannabinoid receptor-interacting protein 1	CB032	CNRIP1	0	-0.0158848	0.554624	0.59836	0.549508	0.0903829	0.0082974	0.151423	-0.370516	6.36e-29	0.126076	0.0158064	0.23337	8.10605e-07
X10748_216	Protocadherin beta-2	PCDB2	PCDHB2	0	0	0.575087	0.56778	0.549485	-0.126218	0.000221141	0.00492085	-0.0254416	0.459894	0.0803506	0.124926	0.119792	0.0122084
X19264_6	Replication protein A 32 kDa subunit	RFA2	RPA2	0	0	0.510077	0.578688	0.549333	-0.00972793	0.776764	0.020148	0.107911	0.00167076	-0.140916	0.00693102	-0.220253	3.34682e-06
X23403_64	Cdc42 effector protein 4	BORG4	CDC42EP4	0	0	0.522248	0.554928	0.549203	0.0363361	0.289414	0.849198	-0.159028	3.35e-06	-0.0226856	0.665326	0.0426448	0.37383
X3481_87	Xaa-Pro aminopeptidase 1	XPNPEP1	XPNPEP1	0	-0.0388657	0.51862	0.56931	0.549124	0.0302908	0.377201	0.865677	-0.205339	1.66e-09	-0.0264791	0.613607	0.0758363	0.113407
X15583_18	Fc receptor-like B	FCRLB	FCRLB	0	0	0.525005	0.530059	0.549083	-0.0336515	0.326547	0.716561	-0.023363	0.497375	0.00690728	0.895227	0.148362	0.00187231
X13963_7	Toll-interacting protein	tollip	TOLLIP	0	-0.0388657	0.519658	0.587259	0.549031	0.0279906	0.414512	0.420984	-0.214716	2.79e-10	0.0185933	0.722946	0.140861	0.0031682
X18901_26	Heat shock 70 kDa protein 1B	HS71B	HSPA1B	0	-0.0214538	0.513441	0.565866	0.548983	0.0194475	0.5708	0.762806	-0.262591	8.29e-15	0.264227	2.91e-07	0.355478	1.83796e-14
X9444_70	Protein DGCR6	DGCR6	DGCR6	0	0	0.576001	0.594023	0.548975	-0.130393	0.000135214	1.15754e-10	0.000281915	0.993467	0.0931311	0.0751614	0.158014	0.000917724
X19587_12	Importin subunit alpha-5	IMA5	KPNA1	0	0	0.709996	0.656833	0.548812	-0.362313	7.95426e-28	3.78702e-21	0.159797	3e-06	0.197658	0.000141172	0.136756	0.00418194
X8268_98	Heparan sulfate glucosamine 3-O-sulfotransferase 3A1	HS3SA	HS3ST3A1	0	0	0.555697	0.604656	0.548748	0.100632	0.00327685	0.0814757	-0.0494661	0.150568	-0.172062	0.00094924	-0.127378	0.00767574
X12513_8	Glycolipid transfer protein	GLTP	GLTP	0	0	0.585603	0.58415	0.548655	0.14313	2.74921e-05	0.00222805	-0.164183	1.58e-06	0.0115556	0.825619	0.0538345	0.261447
X17712_7	Isopentenyl-diphosphate Delta-isomerase 1	IDI1	IDI1	0	-0.0388657	0.53789	0.600151	0.548592	0.0603843	0.0781404	0.589354	-0.276637	2.51e-16	0.169812	0.00110901	0.300087	1.51977e-10
X24447_26	Protein FAM221A	F221A	FAM221A	0	0	0.546356	0.579976	0.548406	0.08333	0.0149749	0.0828201	-0.242641	8.42e-13	0.0315043	0.547973	0.0281725	0.556961
X12399_194	Coiled-coil domain-containing protein 50	CCD50	CCDC50	0	-0.0214538	0.534864	0.56036	0.548398	0.0503192	0.142228	0.499638	-0.299452	5.48e-19	0.237385	4.4e-06	0.314685	1.68196e-11
X22491_10	LIM domain-binding protein 2	LDB2	LDB2	0	0	0.527799	0.559735	0.548246	-0.0446875	0.192533	0.756777	0.0954745	0.00544888	-0.0112716	0.82984	-0.00162413	0.972993
X12456_5	6-phosphofructo-2-kinase/fructose-2,6-bisphosphatase 3	F263	PFKFB3	0	0	0.574187	0.581786	0.548194	-0.117462	0.00059156	0.00391167	0.171217	5.45e-07	-0.0552698	0.291626	0.00333565	0.944567
X22992_6	Microtubule-associated protein RP/EB family member 3	MARE3	MAPRE3	0	0	0.503368	0.579425	0.548127	-0.0025322	0.941166	0.673844	-0.140056	4.35e-05	0.0479334	0.360502	0.204128	1.70536e-05
X21857_26	Guanine nucleotide-binding protein subunit beta-2-like 1	RACK1	RACK1	0	0	0.517205	0.541783	0.548093	-0.035946	0.294625	0.443011	0.121454	0.000399335	-0.0573348	0.273943	-0.118966	0.0128227
X4829_43	14-3-3 protein sigma	STRATIFIN	SFN	0	0	0.513893	0.539709	0.548037	0.0232021	0.498822	0.42904	-0.27731	2.11e-16	0.374528	1.24e-13	0.399635	3.46132e-18
X4194_26	Acidic leucine-rich nuclear phosphoprotein 32 family member B	AN32B	ANP32B	0	0.00294911	0.501912	0.561913	0.548022	-0.00494534	0.885391	0.780134	-0.201353	3.45e-09	0.0653007	0.212642	0.213089	7.00698e-06
X17505_125	N-acetylated-alpha-linked acidic dipeptidase-like protein	NALDL	NAALADL1	0	0	0.705084	0.70324	0.547866	-0.350602	4.787e-26	3.29885e-29	0.0213871	0.534455	0.281689	4.21e-08	0.293454	3.97023e-10
X13125_45	Vitronectin	Vitronectin	VTN	0	0	0.513641	0.536805	0.547829	-0.0289538	0.398631	0.635163	0.118998	0.000523581	0.0684567	0.191312	-0.0472946	0.32394
X18942_11	Proteasome subunit beta type-9	PSB9	PSMB9	0	0	0.516343	0.571164	0.547803	-0.0270313	0.430695	0.845355	0.0502023	0.14458	0.190811	0.000240904	0.108733	0.0230109
X3397_7	Tyrosine-protein phosphatase non-receptor type 11	SHP-2	PTPN11	0	-0.0214538	0.520153	0.571775	0.547784	0.0334282	0.32977	0.719094	-0.347536	2.01e-25	0.216323	2.99e-05	0.37259	7.72382e-16
X24450_96	UPF0692 protein C19orf54	CS054	C19orf54	0	0	0.52063	0.549534	0.547784	0.0308852	0.367907	0.215229	0.0296418	0.389195	0.0638576	0.222946	-0.0638674	0.182645
X15386_7	Fatty acid-binding protein, adipocyte	FABPA	FABP4	0	0	0.502019	0.586492	0.547736	-0.00812987	0.812689	0.889994	-0.0365475	0.288324	0.348054	7.32e-12	0.353779	2.49203e-14
X3450_4	Kallikrein-6	Kallikrein 6	KLK6	0	0	0.592827	0.557177	0.547676	-0.163467	1.61264e-06	1.26508e-20	-0.0323045	0.348005	0.133633	0.0104883	0.316139	1.34168e-11
X4149_8	Platelet-derived growth factor subunit B	PDGF-BB	PDGFB	0	0	0.535252	0.529281	0.547568	-0.0593361	0.0834615	0.201425	0.0375138	0.275758	-0.0129969	0.804285	-0.0644919	0.178395
X16593_3	FAS-associated death domain protein	FADD	FADD	0	0	0.5713	0.593118	0.547527	0.121218	0.000390956	0.0188466	-0.203921	2.16e-09	0.108637	0.0377664	0.258822	4.04541e-08
X6464_40	Transmembrane protein PVRIG	PVRIG	PVRIG	0	0	0.535339	0.540751	0.547494	0.0554989	0.105484	0.439699	-0.0182067	0.596928	-0.0620035	0.236699	0.0559257	0.243345
X15494_11	Fibroblast growth factor-binding protein 1	FGFP1	FGFBP1	0	0	0.513424	0.540264	0.54746	-0.0225893	0.510233	0.946166	0.0548539	0.110863	0.0335908	0.521775	-0.0439342	0.359543
X18928_10	Protein S100-Z	S100Z	S100Z	0	0	0.519065	0.561161	0.547427	-0.0346818	0.311946	0.356509	0.0845809	0.0138589	-0.0341665	0.514661	-0.0492787	0.304033
X25464_1	Cytochrome P450 2C19	CP2CJ	CYP2C19	0	0	0.517512	0.546865	0.547334	0.0261282	0.446258	0.911594	0.0105617	0.759032	-0.0694529	0.184916	-0.061389	0.20025
X19601_15	Ankyrin repeat and SOCS box protein 9	ASB9	ASB9	0	0	0.519439	0.584872	0.547147	0.0315677	0.357412	0.631259	-0.308206	4.49e-20	0.259102	5.01e-07	0.385124	6.70484e-17
X21239_31	Cytohesin-1	CYH1	CYTH1	0	0	0.549321	0.546548	0.546965	0.0906223	0.00812716	0.0728968	0.0431348	0.210078	-0.12379	0.0178234	-0.147311	0.00201834
X10064_12	Putative hydrolase RBBP9	RBBP9	RBBP9	0	0	0.601972	0.607541	0.546943	0.166314	1.05306e-06	1.45786e-05	-0.109352	0.00144523	-0.00065348	0.990059	-0.0122417	0.798581
X10054_3	Gigaxonin	GAN	GAN	0	0	0.552052	0.559772	0.546682	-0.0976976	0.00431259	0.0859218	-0.0539952	0.116571	0.126711	0.0152827	0.100142	0.0363759
X4913_78	C-C motif chemokine 16	HCC-4	CCL16	0	0	0.530733	0.545334	0.546649	-0.064993	0.0579198	0.0297435	0.00259164	0.94	0.316764	5.66e-10	0.263859	2.14854e-08
X12578_13	ADP-ribosylation factor 3	ARF3	ARF3	0	0	0.566697	0.575438	0.546604	0.117306	0.00060164	0.0186392	-0.173474	3.84e-07	-0.0231312	0.659161	0.00147275	0.97551
X18308_30	Syntaxin-binding protein 6	STXB6	STXBP6	0	0	0.605085	0.554511	0.546596	-0.174907	2.78381e-07	6.68329e-06	-0.0938221	0.00631603	0.0455248	0.385169	0.160431	0.00076281
X10582_36	Protein O-mannose kinase	SG196	POMK	0	0	0.51032	0.570163	0.546511	0.0163696	0.633261	0.757865	-0.136441	6.85e-05	-0.00796958	0.879228	0.04964	0.300497
X16621_77	NAD(P)H-hydrate epimerase	AIBP	NAXE	0	-0.0643914	0.503596	0.567542	0.546507	0.00410551	0.904752	0.733933	-0.196518	8.23e-09	-0.00151292	0.976988	0.0914611	0.0560712
X21823_5	Protein phosphatase 1G	PPM1G	PPM1G	0	0	0.536389	0.593923	0.546503	0.0618994	0.0709398	1.09588e-15	-0.208573	9.06e-10	0.119775	0.0219144	0.25443	6.94782e-08
X13482_14	CCR4-NOT transcription complex subunit 1	CNOT1	CNOT1	0	0	0.539843	0.596666	0.546429	0.0742853	0.0301488	0.128984	-0.263872	6.08e-15	0.022954	0.66161	0.0425028	0.375425
X21935_16	Ubiquitin-conjugating enzyme E2 H	UBE2H	UBE2H	0	0	0.538035	0.581693	0.546403	0.0731521	0.0327637	0.217832	-0.310382	2.38e-20	0.121485	0.0200819	0.247606	1.57867e-07
X3292_75	CD48 antigen	CD48	CD48	0	0	0.527554	0.546176	0.546388	-0.0528114	0.123481	0.294765	-0.0701821	0.0412686	0.162918	0.00176566	0.270467	9.18071e-09
X11105_171	Alpha-enolase	Alpha enolase	ENO1	0	0	0.536722	0.592292	0.546269	0.0591144	0.0846233	0.650558	-0.217622	1.58e-10	0.0594816	0.256349	0.118298	0.0133394
X19383_131	Cyclin-dependent kinase 2-interacting protein	CINP	CINP	0	0	0.536745	0.559243	0.54618	0.069722	0.0418906	0.491766	-0.138518	5.29e-05	-0.0699588	0.18173	0.0484169	0.312578
X14038_130	Cystatin-F	CYTF	CST7	0	0	0.524261	0.532624	0.546161	-0.0487444	0.155154	0.473139	-0.016544	0.630857	0.0924641	0.0772822	0.157669	0.000942127
X18310_26	Selenoprotein W	SELW	SELENOW	0	-0.0643914	0.50193	0.557319	0.54612	-0.00524197	0.878568	0.676954	-0.194458	1.18e-08	0.105011	0.0446795	0.178089	0.000182441
X23320_11	Multivesicular body subunit 12B	MB12B	MVB12B	0	-0.0643914	0.506382	0.575077	0.545993	0.00768061	0.822863	0.821313	-0.244203	5.95e-13	0.100661	0.0543469	0.200461	2.42725e-05
X25286_33	Rab GTPase-activating protein 1-like	RBG1L	RABGAP1L	0	0	0.535431	0.561146	0.545919	0.0560916	0.10181	0.258408	-0.117291	0.000630157	0.0209438	0.689634	-0.00444481	0.926181
X23023_21	Protein S100-A14	S100A14	S100A14	0	0	0.534754	0.544914	0.545844	-0.0626118	0.0677466	0.561695	-0.0297503	0.38746	0.164268	0.00161423	0.153491	0.00128836
X12649_80	Malate dehydrogenase, mitochondrial	Malate dehydrogenase 2	MDH2	0	-0.0388657	0.507207	0.584131	0.545751	0.011216	0.743733	0.861395	-0.195132	1.05e-08	-0.0443428	0.397641	0.0563563	0.23973
X12494_99	Gamma-aminobutyric acid receptor-associated protein-like 2	GBRL2	GABARAPL2	0	-0.0643914	0.507322	0.563886	0.545736	0.00632727	0.853686	0.668159	-0.228643	1.7e-11	0.121293	0.0202805	0.226701	1.68458e-06
X3847_56	Persulfide dioxygenase ETHE1, mitochondrial	ETHE1	ETHE1	0	0	0.52795	0.570945	0.545725	-0.0496895	0.147294	0.581815	0.0114832	0.738743	0.0950368	0.069362	0.0308089	0.520644
X8261_51	Erythrocyte band 7 integral membrane protein	STOM	STOM	0	0	0.543899	0.573301	0.545684	0.0836366	0.0146074	0.000252871	-0.135655	7.55e-05	-0.0771738	0.140597	-0.0311604	0.515895
X19280_29	Ubiquitin-conjugating enzyme E2 D3	UB2D3	UBE2D3	0	0	0.541044	0.576421	0.545669	0.0704451	0.0398057	0.116696	-0.269912	1.37e-15	0.0293817	0.575272	0.182254	0.000127545
X15368_3	BMP-binding endothelial regulator protein	BMPER	BMPER	0	-0.0388657	0.510782	0.575412	0.545625	0.01924	0.574917	0.842411	-0.227055	2.36e-11	0.000919663	0.986011	-0.0129803	0.786713
X20950_159	Phosphoribosyltransferase domain-containing protein 1	PRDC1	PRTFDC1	0	0	0.52022	0.562274	0.545584	0.0337651	0.324916	0.553319	-0.170577	6.02e-07	-0.00305255	0.95359	0.111243	0.0200155
X9842_2	Catenin beta-1	b-Catenin	CTNNB1	0	0	0.535278	0.52032	0.545569	-0.0603956	0.0780843	0.627642	-0.155442	5.57e-06	0.217265	2.76e-05	0.267214	1.39932e-08
X4771_10	Acid sphingomyelinase-like phosphodiesterase 3a	ASM3A	SMPDL3A	0	0	0.507444	0.524303	0.545502	0.00911686	0.790449	0.842321	0.0262637	0.445517	-0.0575165	0.272423	-0.11648	0.0148391
X5467_15	Heat shock protein HSP 90-beta	HSP 90b	HSP90AB1	0	-0.0388657	0.505074	0.578666	0.545498	0.00726166	0.832378	0.895685	-0.298693	6.78e-19	0.144937	0.00546926	0.336692	4.81526e-13
X3835_11	Toll-like receptor 2	TLR2	TLR2	0	0	0.614059	0.580885	0.545491	0.197484	6.12747e-09	1.11372e-05	0.107713	0.0017042	-0.228562	1e-05	-0.207203	1.26219e-05
X4983_6	Endoplasmic reticulum resident protein 29	ERP29	ERP29	0	0	0.51562	0.537635	0.545401	-0.0315585	0.357553	0.248344	-0.0898954	0.00889309	0.387635	1.43e-14	0.397439	5.47208e-18
X16803_4	Calretinin	CALB2	CALB2	0	0	0.54076	0.586015	0.545394	0.0648473	0.0584853	0.304207	-0.303703	1.64e-19	0.176034	0.00071788	0.278304	3.24945e-09
X4920_10	Lysozyme C	Lysozyme	LYZ	0	0	0.511951	0.566272	0.545327	-0.0319505	0.351609	0.220905	-0.0774414	0.0242895	0.362772	7.95e-13	0.411703	2.62762e-19
X22037_47	EF-hand domain-containing protein D2	EFHD2	EFHD2	0	-0.0643914	0.520014	0.600375	0.545293	0.0347689	0.310732	0.550643	-0.352013	4.4e-26	0.160026	0.00213472	0.279633	2.71556e-09
X7769_29	SH3 domain-binding protein 2	3BP2	SH3BP2	0	0	0.574954	0.558045	0.545223	0.120614	0.000418177	0.00215228	-0.0146115	0.671284	-0.0801294	0.125972	-0.227394	1.56301e-06
X25105_87	Eukaryotic translation initiation factor 2A	EIF2A	EIF2A	0	0	0.523639	0.562743	0.545215	-0.0413587	0.227831	0.511199	0.0532458	0.121738	0.106273	0.0421616	-0.00817666	0.864662
X19823_75	NAD-dependent protein deacetylase sirtuin-1	SIR1	SIRT1	0	0	0.617991	0.570301	0.5452	-0.193825	1.17427e-08	6.61727e-06	0.0149044	0.665093	0.110659	0.0343193	0.226959	1.63825e-06
X12018_84	Thiamin pyrophosphokinase 1	TPK1	TPK1	0	0	0.527108	0.535428	0.545156	-0.0425444	0.214765	0.527996	-0.119786	0.000480242	0.0304417	0.56156	0.173941	0.000258556
X18332_17	Complexin-1	CPLX1	CPLX1	0	-0.0643914	0.502045	0.56061	0.545133	0.0043505	0.899098	0.558032	-0.225286	3.39e-11	0.0888683	0.0895654	0.174982	0.000237074
X22530_111	Phytanoyl-CoA dioxygenase domain-containing protein 1	PHYD1	PHYHD1	0	0	0.513514	0.541783	0.545081	-0.0246476	0.472454	0.456199	0.0223877	0.515506	0.0659351	0.208223	0.0194743	0.684762
X14011_17	Protein S100-A11	S100A11	S100A11	0	0	0.523092	0.557326	0.544958	0.0406364	0.236063	0.0848691	0.0261541	0.447419	0.00488301	0.925825	-0.0333587	0.486714
X3392_68	Protein kinase B gamma	PKB gamma	AKT3	0	-0.0158848	0.514448	0.559053	0.54494	0.0248755	0.468367	0.884522	-0.295965	1.45e-18	0.201058	0.000107532	0.361254	6.43969e-15
X12479_50	cAMP-dependent protein kinase type I-beta regulatory subunit	KAP1	PRKAR1B	0	-0.0388657	0.507149	0.549065	0.54494	0.0151392	0.659014	0.930311	-0.221562	7.22e-11	0.0116763	0.823828	0.109866	0.0216139
X3897_61	Pyridoxal phosphate phosphatase	PLPP	PDXP	0	0	0.53623	0.605118	0.544929	0.0624697	0.0683742	0.24288	-0.236229	3.41e-12	-0.0188403	0.71942	0.077002	0.107952
X23345_2	N-terminal EF-hand calcium-binding protein 1	NECA1	NECAB1	0	0	0.52994	0.563272	0.544914	0.0561622	0.101378	0.395526	-0.221772	6.92e-11	0.00663523	0.899331	0.212574	7.38188e-06
X21858_25	E3 ubiquitin-protein ligase SIAH1	SIAH1	SIAH1	0	0	0.522803	0.534247	0.544847	-0.0318574	0.353015	0.333584	-0.00159332	0.963091	-0.00821184	0.875586	0.047634	0.320477
X9876_20	Fructose-bisphosphate aldolase C	aldolase C	ALDOC	0	0	0.514193	0.549337	0.544772	0.0150488	0.660922	0.623475	-0.157091	4.41e-06	0.0237529	0.650599	0.0449248	0.348802
X12381_26	Carbonyl reductase [NADPH] 1	CBR1	CBR1	0	0	0.527863	0.554042	0.544698	0.0457551	0.182111	0.227712	-0.328822	8.83e-23	0.140366	0.00715584	0.273948	5.81107e-09
X13054_87	Profilin-2	Profilin II	PFN2	0	0	0.574227	0.553886	0.544664	-0.120293	0.000433377	1.87822e-05	-0.113549	0.000937955	0.119992	0.0216744	0.262211	2.64647e-08
X9543_131	Conserved oligomeric Golgi complex subunit 8	COG8	COG8	0	0	0.608805	0.607176	0.544489	0.190281	2.1786e-08	5.91984e-07	-0.147433	1.67e-05	-0.0601167	0.251297	0.128262	0.00726011
X18397_5	Aldo-keto reductase family 1 member C4	AK1C4	AKR1C4	0	0	0.613183	0.574195	0.54446	-0.189348	2.5587e-08	3.48638e-18	0.134382	8.83e-05	-0.00781113	0.881611	0.0297029	0.53573
X11313_100	Pterin-4-alpha-carbinolamine dehydratase	PHS	PCBD1	0	0	0.524244	0.561786	0.544445	0.0327722	0.339355	0.141323	-0.232248	7.98e-12	0.266076	2.39e-07	0.371292	9.88811e-16
X21747_8	UBE2N (Ubc13)/Uev1a Complex	UBE2N/UB2V1 Complex	UBE2N|UBE2V1	0	-0.0643914	0.507137	0.590356	0.544352	0.012152	0.723192	0.957221	-0.337171	6.15e-24	0.174146	0.00082041	0.351561	3.69767e-14
X14687_6	Perilipin-3	M6PBP	PLIN3	0	0	0.509744	0.550468	0.544325	0.0113493	0.740796	0.856782	-0.0497706	0.148069	0.0104354	0.842291	0.0545729	0.254953
X9503_1	Neuromedin-S	NMS	NMS	0	0	0.501776	0.563324	0.544296	0.000227913	0.9947	0.710107	-0.0774489	0.0242756	-0.0396778	0.449181	0.0448309	0.349812
X23385_18	Cytosolic arginine sensor for mTORC1 subunit 1	CAST1	CASTOR1	0	0	0.598304	0.552572	0.544102	0.179348	1.36347e-07	1.65734e-06	-0.091743	0.00758214	-0.00906159	0.862833	0.099295	0.0379956
X15666_21	Bone morphogenetic protein 2	BMP-2	BMP2	0	0	0.501389	0.544057	0.544102	0.0105165	0.759206	0.607469	-0.01685	0.624552	-0.0845489	0.106338	-0.079431	0.09725
X6267_51	Stathmin-4	STMN4	STMN4	0	0	0.511786	0.560059	0.54405	-0.0293777	0.391759	0.389212	-0.0092414	0.788388	0.0397235	0.448657	0.124077	0.00942109
X22953_85	CCAAT/enhancer-binding protein beta	CEBPB	CEBPB	0	0	0.520578	0.543425	0.544043	0.0361136	0.29238	0.625897	-0.01482	0.666875	0.00752351	0.88594	-0.0756501	0.114298
X20451_126	Intraflagellar transport protein 22 homolog	IFT22	IFT22	0	0	0.562305	0.573309	0.543976	-0.107507	0.0016749	0.0121231	-0.0409175	0.234492	0.137086	0.0086381	0.170659	0.000338819
X17332_3	Poly(ADP-ribose) glycohydrolase ARH3	ARHL2	ADPRS	0	-0.0158848	0.50725	0.559913	0.543942	0.00815163	0.812197	0.793685	-0.244963	5.02e-13	0.263288	3.22e-07	0.346898	8.39373e-14
X12963_1	Protein GPR107	GP107	GPR107	0	0	0.514558	0.556559	0.543942	0.018189	0.595984	0.601379	0.0331153	0.336033	-0.158964	0.00228703	-0.147565	0.00198215
X7784_1	Kininogen-1	Kininogen, HMW	KNG1	0	0	0.516652	0.555591	0.543935	-0.0307977	0.369267	0.581553	0.0579521	0.0920804	0.154118	0.00311612	0.10923	0.0223889
X21235_11	Importin subunit alpha-6	IMA6	KPNA5	0	0	0.523807	0.529225	0.543845	0.0374879	0.274388	0.575454	-0.119651	0.00048745	0.0617707	0.238467	0.126488	0.00811491
X14106_46	Rap1 GTPase-GDP dissociation stimulator 1	GDP/GTP exchange protein	RAP1GDS1	0	0	0.59918	0.564173	0.543819	0.173813	3.30995e-07	3.10031e-06	-0.0873519	0.0110275	-0.0631642	0.228021	-0.0513652	0.28399
X18165_181	Ubiquitin-conjugating enzyme E2 variant 2	UB2V2	UBE2V2	0	-0.0643914	0.503509	0.578819	0.543767	0.00423041	0.901869	0.929005	-0.266903	2.9e-15	0.118669	0.023175	0.203955	1.73421e-05
X18824_7	Eukaryotic initiation factor 4A-II	IF4A2	EIF4A2	0	0	0.500457	0.554646	0.54376	-0.000150896	0.996491	0.954229	-0.206447	1.35e-09	0.040345	0.441585	0.18615	9.05935e-05
X10531_18	GTPase NRas	RASN	NRAS	0	0	0.515168	0.548067	0.543678	0.0300538	0.380947	0.34269	0.0422825	0.219236	-0.0480076	0.359758	-0.0964667	0.0438503
X7073_69	Uncharacterized protein C22orf15	CV015	C22orf15	-0.00286453	0	0.52885	0.535681	0.543566	0.0470687	0.169866	0.0609478	-0.018931	0.582414	-0.0496857	0.343192	-0.0504996	0.292195
X24669_12	DnaJ homolog subfamily C member 5B	DNJ5B	DNAJC5B	0	-0.0643914	0.516245	0.577951	0.54335	0.0249508	0.467022	0.815679	-0.238129	2.26e-12	0.0660532	0.207407	0.165703	0.000504998
X11626_7	Ubiquitin-conjugating enzyme E2 variant 1	UB2V1	UBE2V1	0	-0.0643914	0.507045	0.571246	0.543324	0.00950788	0.781684	0.893306	-0.265818	3.78e-15	0.135971	0.00920137	0.22829	1.41802e-06
X18313_4	Isoaspartyl peptidase/L-asparaginase	Asparaginase-like protein 1	ASRGL1	0	0	0.555475	0.56338	0.543257	0.098911	0.00385281	0.016325	-0.177523	2.02e-07	-0.00725849	0.889932	-0.0883924	0.064874
X16882_27	14 kDa phosphohistidine phosphatase	PHP14	PHPT1	0	0	0.531751	0.561879	0.54325	0.0524127	0.126343	0.699857	-0.300535	4.04e-19	0.267207	2.11e-07	0.423217	2.03306e-20
X12476_50	Fructose-2,6-bisphosphatase TIGAR	TIGAR	TIGAR	0	0	0.513126	0.549404	0.543216	0.0226197	0.509662	0.323486	-0.131525	0.000124765	0.100001	0.0559545	0.156942	0.000995428
X23287_109	NADH dehydrogenase	NDUB6	NDUFB6	0	0	0.582319	0.548495	0.54303	-0.137391	5.73373e-05	0.00648514	0.0563771	0.101282	-0.0500183	0.339967	0.070767	0.139684
X8587_21	Serine protease inhibitor Kazal-type 14	ISK52	SPINK14	0	0	0.5559	0.577724	0.543022	0.0960792	0.00500306	0.0533452	-0.179034	1.59e-07	0.0874786	0.0947129	0.204286	1.67933e-05
X21662_121	Dual specificity tyrosine-phosphorylation-regulated kinase 3	DYRK3	DYRK3	0	0	0.533233	0.52328	0.542955	0.060738	0.0764081	0.228632	0.0583972	0.0896055	-0.03682	0.482532	-0.126709	0.00800373
X22981_3	Hippocalcin-like protein 1	HPCL1	HPCAL1	0	0	0.509122	0.569928	0.542929	0.0320315	0.350388	0.0198009	-0.318535	2.1e-21	0.0637386	0.223811	0.183965	0.00010984
X20449_72	Josephin-1	JOS1	JOSD1	0	0	0.539742	0.540811	0.542929	0.0761361	0.0262628	0.116507	0.00183018	0.957609	-0.0560958	0.284463	-0.101602	0.0337232
X25232_4	EH domain-containing protein 3	EHD3	EHD3	0	-0.0643914	0.508014	0.571782	0.542907	0.00749564	0.827061	0.889831	-0.237427	2.64e-12	0.184973	0.000374561	0.281908	1.99323e-09
X12720_71	Ubiquilin-4	UBQL4	UBQLN4	0	-0.0643914	0.508552	0.572501	0.542888	0.0107109	0.754895	0.900301	-0.255393	4.6e-14	0.123226	0.0183544	0.248692	1.3876e-07
X6252_62	Secretoglobin family 3A member 1	Secretoglobin family 3A member 1	SCGB3A1	0	0	0.531129	0.53679	0.54278	-0.0570093	0.0963211	0.284517	0.0226306	0.510959	0.2532	9.22e-07	0.189211	6.8903e-05
X19488_1	Programmed cell death protein 6	PDCD6	PDCD6	0	0	0.503926	0.547304	0.542754	0.0057789	0.866242	0.254179	-0.0103786	0.763084	0.0241272	0.645466	3.92567e-05	0.999347
X9343_16	Interleukin-2 receptor subunit beta	IL-2 sRb	IL2RB	0	0	0.523694	0.551838	0.542695	-0.0457984	0.181697	0.739587	-0.0508256	0.139652	0.249428	1.35e-06	0.275903	4.48214e-09
X8892_14	Platelet endothelial aggregation receptor 1:Cytoplasmic domain	PEAR1:CD	PEAR1	0	0	0.52022	0.583796	0.542672	0.0494446	0.149302	0.138652	-0.182039	9.74e-08	-0.126529	0.0154311	-0.11205	0.0191281
X19370_30	Heparan sulfate glucosamine 3-O-sulfotransferase 4	HS3S4	HS3ST4	0	0	0.6178	0.568137	0.542646	-0.191566	1.74357e-08	1.35951e-07	-0.0189508	0.582017	0.103835	0.0471378	0.125624	0.00856311
X13013_41	E3 ubiquitin-protein ligase parkin	PRKN2	PRKN	0	0	0.53463	0.537911	0.542635	0.0621199	0.0699384	0.225075	-0.167229	1e-06	0.00985756	0.850919	0.0906889	0.0581871
X6557_50	Leucine-rich repeat-containing protein 15	LRC15	LRRC15	0	0	0.510134	0.548074	0.542565	-0.028328	0.408906	0.0670366	-0.0858315	0.01251	0.287666	2.1e-08	0.33508	6.30888e-13
X19491_11	Estradiol 17-beta-dehydrogenase 8	DHB8	HSD17B8	0	0	0.619108	0.612575	0.542531	-0.206833	1.09845e-09	1.77705e-07	-0.088051	0.0103997	0.27405	9.97e-08	0.323693	4.06661e-12
X7893_19	Oxidized low-density lipoprotein receptor 1	OLR1	OLR1	0	-0.0388657	0.511922	0.582419	0.542512	0.0180698	0.598396	0.853236	-0.266152	3.48e-15	0.0523113	0.318263	0.21548	5.49069e-06
X6502_50	Cysteine-rich motor neuron 1 protein:Extracellular domain	CRIM1:ECD	CRIM1	0	-0.0388657	0.507013	0.569187	0.542438	0.0136737	0.69022	0.922252	-0.24668	3.41e-13	0.049329	0.346672	0.166921	0.000458281
X22074_35	Ataxin-2-binding protein 1	Ataxin-2-binding protein 1	RBFOX1	0	0	0.525954	0.562866	0.54233	0.04126	0.228944	0.145779	-0.120037	0.000467198	0.0179698	0.731874	0.0227596	0.635159
X12658_72	Pantothenate kinase 3	PANK3	PANK3	0	0	0.538313	0.564221	0.542196	0.0642274	0.0609417	0.810528	-0.093015	0.00678302	0.0389015	0.458109	0.212957	7.10104e-06
X21529_6	Ubiquitin-associated and SH3 domain-containing protein A	UBS3A	UBASH3A	0	0	0.581498	0.552937	0.542144	-0.131538	0.000117841	2.38975e-05	-0.0487323	0.156724	0.196936	0.000149485	0.172944	0.000280842
X17673_34	Carbonic anhydrase 5B, mitochondrial	Carbonic Anhydrase VB	CA5B	0	0	0.515776	0.558562	0.54211	-0.0287632	0.401743	0.563323	-0.0482211	0.161123	0.132277	0.0113058	0.20354	1.80541e-05
X5248_68	Peptidyl-prolyl cis-trans isomerase F, mitochondrial	Cyclophilin F	PPIF	0	0	0.522737	0.529248	0.542095	0.0298228	0.384621	0.271476	-0.143592	2.76e-05	-0.0315721	0.547112	0.0152158	0.751102
X22398_5	Acidic leucine-rich nuclear phosphoprotein 32 family member C	AN32C	ANP32C	0	0	0.544336	0.552687	0.541984	-0.080018	0.019493	0.106297	-0.00538252	0.875776	0.227053	1.15e-05	0.1264	0.00815995
X12580_7	Proteasome subunit beta type-5	PSB5	PSMB5	0	0	0.513901	0.569612	0.541868	0.026701	0.43635	0.962357	-0.155362	5.63e-06	-0.0475578	0.364282	0.00182149	0.969713
X12812_25	Acylphosphatase-2	ACYP2	ACYP2	0	-0.0643914	0.510299	0.541042	0.541827	0.0149887	0.662193	0.944107	-0.193904	1.3e-08	0.0391888	0.454792	0.10674	0.0256594
X24423_9	Protein phosphatase 1 regulatory subunit 3G	PP13G	None	0	0	0.585325	0.577043	0.541794	-0.132847	0.000100565	9.04434e-05	0.0014299	0.966874	0.0873118	0.0953464	0.154378	0.00120629
X13102_1	Protein FAM3D	FAM3D	FAM3D	0	0	0.537879	0.564385	0.541675	-0.0672085	0.0498687	0.204837	-0.0208167	0.545414	0.221901	1.83e-05	0.237328	5.19639e-07
X5242_37	Dual specificity mitogen-activated protein kinase kinase 4	MP2K4	MAP2K4	0	0	0.530123	0.560639	0.541615	-0.0567185	0.0980338	0.481623	-0.0220433	0.521988	0.182308	0.000456193	0.177851	0.000186175
X17835_28	Annexin A13	ANX13	ANXA13	0	0	0.555116	0.563033	0.541608	-0.0980895	0.00415892	0.0532267	0.0393924	0.252408	0.0848778	0.104979	0.113373	0.0177461
X22812_4	Trafficking protein particle complex subunit 6B	TPC6B	TRAPPC6B	0	0	0.511963	0.533127	0.541608	-0.0212742	0.53517	0.000321819	0.00795665	0.817246	0.0876901	0.0939146	0.00254709	0.957657
X24431_32	Cap-specific mRNA (nucleoside-2'-O-)-methyltransferase 1	CMTR1	CMTR1	-0.00963674	0	0.51159	0.526392	0.541608	-0.0152698	0.65626	0.0504035	-0.0622284	0.0704419	0.0843748	0.107063	0.0791208	0.0985678
X12425_104	ADP-ribosylation factor 6	ARF6	ARF6	0	0	0.589179	0.569768	0.541541	0.161584	2.1295e-06	5.11734e-05	-0.0171496	0.618405	-0.225852	1.29e-05	-0.253287	7.98567e-08
X20373_141	Glucose-induced degradation protein 8 homolog	GID8	GID8	0	0	0.535912	0.538153	0.541433	0.0670675	0.0503515	0.545543	0.10013	0.00355202	-0.16877	0.00119112	-0.241422	3.25381e-07
X8046_9	Galectin-1	Galectin-1	LGALS1	0	0	0.50758	0.556395	0.541366	0.0143691	0.675344	0.671056	-0.101321	0.00317496	0.036782	0.482984	0.114087	0.017037
X11196_31	Collagen alpha-3(VI) chain:Bovine pancreatic trypsin inhibitor/Kunitz inhibitor domain, isoform 1	Collagen alpha-3(VI):BPTI/Kunitz inhibitor	COL6A3	0	0	0.52096	0.534259	0.541232	-0.0461068	0.17877	0.171746	-0.121845	0.000382327	0.348819	6.54e-12	0.443625	1.69938e-22
X13468_5	Neuralized-like protein 4	NEUL4	NEURL4	0	0	0.522453	0.537714	0.541187	-0.0363647	0.289035	0.0206108	0.15871	3.5e-06	-0.15689	0.00261354	-0.221929	2.80519e-06
X9789_52	Nesprin-2	Nesprin-2	SYNE2	0	-0.0388657	0.530941	0.612753	0.541127	0.0533725	0.119538	0.138243	-0.325089	2.83e-22	0.113478	0.0299645	0.277676	3.53555e-09
X20183_48	Homeobox protein MOX-1	MEOX1	MEOX1	0	0	0.671813	0.596041	0.541083	0.296364	9.81859e-19	1.42243e-17	-0.185013	5.95e-08	-0.15051	0.0039013	-0.0642145	0.180274
X19111_10	NEDD8-conjugating enzyme Ubc12	UBC12	UBE2M	0	0	0.589566	0.570621	0.541057	0.156132	4.67762e-06	3.45317e-05	-0.113456	0.000947126	-0.0415184	0.428408	-0.121492	0.011026
X4280_47	Proteasome subunit alpha type-2	PSA2	PSMA2	0	0	0.522939	0.580122	0.540949	0.0436478	0.203098	0.615637	-0.217681	1.56e-10	0.0737595	0.159074	0.150273	0.00163108
X3412_7	Apoptosis regulator Bcl-2	Bcl-2	BCL2	0	0	0.572315	0.550118	0.540912	0.128717	0.000165027	0.00437292	0.0936097	0.00643601	-0.227593	1.1e-05	-0.34732	7.79702e-14
X5803_24	Complement C3d fragment	C3d	C3	0	0	0.533181	0.555576	0.540845	-0.0601124	0.0794935	0.450707	-0.0534967	0.119988	0.248969	1.41e-06	0.297759	2.13487e-10
X7745_3	CDGSH iron-sulfur domain-containing protein 1	ZCD1	CISD1	0	-0.0643914	0.515093	0.563186	0.540681	0.0244939	0.47522	0.882175	-0.230418	1.17e-11	0.127827	0.0143989	0.199519	2.65477e-05
X16765_52	Platelet basic protein	PBP	PPBP	0	0	0.527354	0.532725	0.540662	-0.0517601	0.13114	0.620638	-0.0937704	0.00634505	0.378102	6.96e-14	0.439774	4.29694e-22
X13636_20	Nucleosome assembly protein 1-like 1	NP1L1	NAP1L1	0	0	0.515142	0.529981	0.540621	-0.034777	0.310619	0.472485	0.0838317	0.014727	0.0260014	0.620022	-0.0468081	0.328948
X19152_4	Protein phosphatase inhibitor 2	IPP2	PPP1R2	0	-0.0388657	0.584073	0.544113	0.54058	-0.143621	2.57836e-05	6.31553e-05	-0.0412545	0.230657	0.0807781	0.122925	0.14475	0.00241926
X12538_19	Regulator of G-protein signaling 7	RGS7	RGS7	0	0	0.542462	0.547486	0.540543	0.0760711	0.0263917	0.231927	-0.122023	0.000374809	0.00491237	0.925381	0.136037	0.00438716
X21480_2	CD82 antigen	CD82 antigen	CD82	0	0	0.528705	0.553812	0.540528	0.0500464	0.144406	0.917758	-0.0118718	0.73024	-0.0551266	0.292879	-0.00397655	0.933939
X3504_58	Hepcidin	LEAP-1	HAMP	0	0	0.508867	0.558726	0.540513	-0.0111746	0.744645	0.239464	-0.00928299	0.787458	0.208107	6.03e-05	0.250128	1.169e-07
X11833_83	Frataxin, mitochondrial	FRDA	FXN	0	0	0.538403	0.571592	0.540509	0.0578476	0.0915169	0.0050962	-0.0883329	0.0101556	0.0915651	0.080217	0.0731209	0.126954
X22049_24	14-3-3 protein eta	14-3-3 eta	YWHAH	0	-0.0214538	0.539155	0.626811	0.540506	0.0664164	0.0526322	0.263069	-0.316264	4.17e-21	0.232592	6.91e-06	0.359594	8.72476e-15
X3808_76	Fibroblast growth factor receptor 2	FGFR-2	FGFR2	0	0	0.52677	0.547743	0.540446	0.0450718	0.188732	0.32842	0.0447377	0.193611	-0.167618	0.00128841	-0.0891997	0.0624549
X11683_19	ADP-ribosylation factor-binding protein GGA3	GGA3	GGA3	0	0	0.567909	0.581719	0.540383	0.120201	0.000437861	0.0542427	-0.262217	9.07e-15	0.0841852	0.107856	0.0969056	0.0428949
X22978_13	High mobility group protein B2	HMG-2	HMGB2	0	0	0.533392	0.526556	0.540346	0.0634226	0.0642573	0.216534	0.130939	0.000133822	-0.129334	0.0132769	-0.289591	6.8673e-10
X4763_31	Afamin	Afamin	AFM	0	0	0.515053	0.567966	0.540334	-0.0325381	0.342818	0.690404	0.0962585	0.00507628	0.125831	0.0160127	0.141074	0.00312222
X13535_2	Collagen type IV alpha-3-binding protein:PH domain	C43BP:PH domain	CERT1	0	0	0.532831	0.534906	0.540294	0.0595104	0.0825568	0.398924	0.189064	3.01e-08	-0.246094	1.88e-06	-0.318327	9.52792e-12
X11429_80	Heterogeneous nuclear ribonucleoproteins C1/C2	hnRNP C1/C2	HNRNPC	0	0	0.515194	0.564794	0.540238	-0.0119267	0.728118	0.260036	-0.0202401	0.556604	-0.0204218	0.696983	-0.0463801	0.333394
X14662_6	Myeloid zinc finger 1	MZF1	MZF1	0	0	0.513843	0.553968	0.540227	-0.018596	0.587784	0.171845	0.071098	0.038685	-0.0279886	0.59353	-0.0212496	0.657772
X15567_2	T-cell surface glycoprotein CD3 zeta chain	CD3-zeta	CD247	0	0	0.516872	0.555461	0.540133	-0.0257073	0.45362	0.68436	0.00139675	0.967642	0.0176769	0.73608	0.0786364	0.100654
X23291_18	PTB-containing, cubilin and LRP1-interacting protein	PCLI1	PID1	0	0	0.564735	0.580271	0.540044	-0.121625	0.000373507	4.3457e-05	0.0919054	0.00747562	0.0252916	0.629607	-0.014602	0.760831
X8458_111	Alpha-synuclein	a-Synuclein	SNCA	0	0	0.503848	0.559537	0.540044	0.0157067	0.647082	0.294253	-0.0271297	0.430652	0.0112818	0.829688	-0.0300687	0.530716
X16599_38	GPN-loop GTPase 1	GPN1	GPN1	0	0	0.529214	0.559604	0.539951	-0.0559405	0.102736	0.0962716	0.0207152	0.547375	0.0740439	0.157468	0.17299	0.000279769
X9126_171	5'-nucleotidase domain-containing protein 3	NT5D3	NT5DC3	0	-0.0388657	0.543173	0.579775	0.539932	0.0755314	0.027482	0.183667	-0.268802	1.81e-15	0.000118103	0.998203	0.154011	0.00123968
X10626_116	Alpha-N-acetylgalactosaminide alpha-2,6-sialyltransferase 3	SIA7C	ST6GALNAC3	0	0	0.573365	0.567285	0.539906	-0.120955	0.000402603	0.000205435	-0.0447578	0.193411	0.15859	0.00234308	0.149052	0.00178167
X24487_95	Biogenesis of lysosome-related organelles complex 1 subunit 3	BL1S3	BLOC1S3	0	0	0.514966	0.536247	0.539858	-0.022517	0.511587	0.875533	0.0534744	0.120143	0.0878338	0.0933754	0.00854684	0.858598
X18387_7	Hsc70-interacting protein	suppression of tumorigenicity 13	ST13	0	-0.0643914	0.536933	0.593212	0.539836	0.0596738	0.0817161	0.418185	-0.325485	2.5e-22	0.241465	2.97e-06	0.415145	1.2354e-19
X13427_66	Mannosyl-oligosaccharide 1,2-alpha-mannosidase IC	MA1C1	MAN1C1	0	0.00453564	0.535446	0.518525	0.539776	-0.0653618	0.0565093	0.492146	-0.0966685	0.00489072	0.201431	0.00010434	0.281052	2.23984e-09
X11666_72	Regulator of G-protein signaling 8	RGS8	RGS8	0	0	0.523712	0.540696	0.539709	-0.0358639	0.295731	4.35479e-05	-0.112707	0.00102403	0.177883	0.000629058	0.202015	2.09157e-05
X24322_1	General transcription factor IIE subunit 1	T2EA	GTF2E1	0	0	0.505798	0.561961	0.539683	0.00556605	0.871125	0.317043	0.110341	0.00130691	-0.0492329	0.347613	-0.0937699	0.0501222
X20953_34	Methylmalonic aciduria and homocystinuria type C protein	MMAC	MMACHC	0	0	0.54276	0.543685	0.539657	-0.0738231	0.0311929	5.0624e-08	0.0755972	0.0278978	0.0114053	0.827852	-0.017286	0.718587
X18227_3	Cyclin-dependent kinase 2-associated protein 2	CDKA2	CDK2AP2	0	0	0.522841	0.547207	0.539635	-0.0436219	0.203367	0.593406	0.0313306	0.362738	-0.00327994	0.950137	-0.103787	0.0300618
X19293_6	Vacuolar protein sorting-associated protein 26A	VP26A	VPS26A	0	-0.0643914	0.504076	0.560062	0.539556	0.00200556	0.953387	0.920855	-0.267383	2.57e-15	0.237926	4.17e-06	0.356109	1.64072e-14
X5649_83	Pregnancy-specific beta-1-glycoprotein 4	PSG4	PSG4	0	0	0.510516	0.525305	0.539549	0.0199467	0.560952	0.829844	0.036595	0.287696	-0.0761326	0.146049	-0.0422743	0.378
X16315_105	Vascular endothelial growth factor receptor 1	VEGF sR1	FLT1	0	0	0.502459	0.539311	0.539534	0.00282939	0.934276	0.985426	-0.196608	8.1e-09	-0.0109522	0.834591	0.10155	0.0338151
X11243_90	Adhesion G-protein coupled receptor F1	GPR110	ADGRF1	0	0.00294911	0.596194	0.549608	0.539527	0.16171	2.09038e-06	0.000714193	-0.255496	4.49e-14	0.0597931	0.253863	0.227308	1.57761e-06
X4721_54	Trefoil factor 3	TFF3	TFF3	0	0	0.515851	0.54915	0.539467	-0.041439	0.226929	0.0977064	-0.137115	6.3e-05	0.426184	1.39e-17	0.401944	2.13063e-18
X13583_19	Apoptotic protease-activating factor 1	Apaf-1	APAF1	0	0	0.606569	0.553815	0.539456	-0.188985	2.7233e-08	3.71862e-10	-0.0669784	0.0514813	0.17665	0.000687057	0.253935	7.38027e-08
X14019_73	Envoplakin	EVPL	EVPL	0	0	0.507331	0.535282	0.539396	0.0100164	0.770326	0.548701	0.0751356	0.0288699	0.00319497	0.951427	-0.180517	0.000148216
X5034_79	Trypsin-2	Trypsin 2	PRSS2	0	0	0.501655	0.527892	0.539389	-0.00785605	0.818887	0.788709	-0.0544124	0.11377	0.257643	5.83e-07	0.298234	1.99213e-10
X16322_10	Marginal zone B- and B1-cell-specific protein	PACAP	MZB1	0	0	0.506452	0.569835	0.539381	-0.012221	0.721684	0.66264	0.0374233	0.276918	0.188669	0.000283687	0.247758	1.5506e-07
X9524_46	Putative spermatogenesis-associated protein 31D4	S31D4	SPATA31D4	0	0	0.518941	0.536362	0.539333	-0.0334251	0.329816	0.657291	0.0700394	0.0416841	-0.00504974	0.9233	0.105821	0.0269657
X3342_76	Abelson tyrosine-protein kinase 2	ABL2	ABL2	0	0	0.507652	0.562996	0.539307	0.00524458	0.878508	0.619105	-0.0503162	0.143669	-0.0847001	0.105711	0.0230935	0.630204
X25424_234	Synaptotagmin-12	SYT12	SYT12	0	0	0.549636	0.560431	0.539303	0.0823849	0.0161593	0.15722	-0.241876	9.97e-13	0.116462	0.02588	0.243671	2.50695e-07
X12488_9	Malignant T-cell-amplified sequence 1	MCTS1	MCTS1	0	0	0.504505	0.533198	0.539229	-0.0143519	0.675709	0.297058	-0.0188517	0.583994	0.204274	8.28e-05	0.0671071	0.161392
X22547_17	RNA-binding motif, single-stranded-interacting protein 1	RBMS1	RBMS1	0	0	0.530901	0.532781	0.539206	0.0513177	0.134471	0.638366	0.125318	0.000258148	-0.118909	0.0228964	-0.224421	2.15253e-06
X24675_2	Microtubule-associated serine/threonine-protein kinase 4	MAST4	MAST4	0	0	0.507913	0.55861	0.539128	0.0137617	0.688332	0.946089	-0.144022	2.61e-05	-0.0513632	0.327125	0.00741587	0.87715
X3005_5	Tyrosine-protein phosphatase non-receptor type 1	PTP-1B	PTPN1	0	0	0.567507	0.546273	0.539095	-0.115782	0.00070918	2.85333e-12	-0.0544131	0.113765	0.188415	0.000289203	0.245303	2.07152e-07
X2986_49	Gro-gamma	Gro-g	CXCL3	0	0	0.516372	0.537129	0.539072	0.025843	0.451238	0.621753	0.0740628	0.0312426	-0.056194	0.283619	-0.104752	0.0285568
X10447_18	Polyadenylate-binding protein 3	PABP3	PABPC3	0	0	0.534893	0.545349	0.539005	0.0616343	0.0721587	0.0997023	-0.0295186	0.391169	-0.0919217	0.0790424	-0.0791034	0.098642
X12821_6	NACHT, LRR and PYD domains-containing protein 10	NAL10	NLRP10	0	0	0.546628	0.547911	0.538812	-0.0819224	0.0167684	0.0822869	-0.0772904	0.0245688	0.182349	0.000454803	0.222949	2.51792e-06
X12509_115	COMM domain-containing protein 1	COMD1	COMMD1	0	0	0.542083	0.554593	0.538797	-0.0689749	0.0441405	0.411465	-0.0309302	0.368907	0.190908	0.000239124	0.188693	7.21889e-05
X16583_8	Bis(5'-nucleosyl)-tetraphosphatase [asymmetrical]	AP4A	NUDT2	0	0	0.525022	0.54421	0.538689	0.0388568	0.257233	0.786672	-0.256396	3.63e-14	0.100721	0.0542028	0.20813	1.15172e-05
X9490_3	Uncharacterized protein C4orf32	CD032	FAM241A	0	0	0.544819	0.564705	0.538685	-0.0747093	0.0292174	0.0015853	-0.0706767	0.039856	0.0963506	0.0655811	0.106079	0.0265927
X20942_4	DnaJ homolog subfamily B member 8	DNJB8	DNAJB8	0	-0.0643914	0.504609	0.56842	0.538644	0.00396836	0.90792	0.865798	-0.215735	2.29e-10	0.121262	0.0203135	0.218116	4.183e-06
X4981_6	Desmocollin-3	DSC3	DSC3	0	0	0.502537	0.564396	0.538622	0.00408869	0.90514	0.891329	0.0564	0.101144	-0.0665715	0.203857	-0.059586	0.21381
X10848_137	Butyrophilin-like protein 3	BTNL3	BTNL3	0	0	0.522149	0.522408	0.53857	0.0400063	0.243413	0.459647	0.00169629	0.960708	0.00967182	0.853696	-0.0598529	0.211763
X20399_7	Oxidoreductase-like domain-containing protein 1	OXLD1	OXLD1	0	0	0.539204	0.53306	0.538525	0.062616	0.0677282	0.52973	-0.122291	0.000363735	0.0627799	0.230869	0.147506	0.00199051
X11152_46	Kallikrein-13	kallikrein 13	KLK13	0	0	0.543162	0.558815	0.538495	-0.073331	0.0323384	0.175865	0.109962	0.00135837	0.0414441	0.429236	0.0449818	0.34819
X9392_43	Alpha-1,3-mannosyl-glycoprotein 4-beta-N-acetylglucosaminyltransferase A	MGT4A	MGAT4A	0	0	0.534847	0.540461	0.538242	-0.0503469	0.142009	0.0505485	-0.0814926	0.0177525	0.136802	0.00877861	0.223858	2.28591e-06
X19215_7	Protein NDRG1	NDRG1	NDRG1	0	0	0.517205	0.562404	0.538142	0.0298594	0.384037	0.876859	-0.201735	3.22e-09	0.130495	0.0124663	0.240915	3.44966e-07
X18837_9	Small glutamine-rich tetratricopeptide repeat-containing protein beta	SGTB	SGTB	0	0	0.517269	0.546206	0.53809	0.0372898	0.276933	0.0370939	-0.23496	4.48e-12	-0.0745292	0.154757	0.0828029	0.0838146
X21549_144	Beta-tectorin	TECTB	TECTB	0	0	0.526038	0.53383	0.538034	-0.0458416	0.181284	0.118005	-0.0526803	0.125754	0.0404015	0.440946	0.155004	0.00115129
X13539_131	Small conductance calcium-activated potassium channel protein 1	KCNN1	KCNN1	0	0	0.507227	0.544072	0.537993	0.00994065	0.772016	0.624613	0.0453148	0.18792	-0.148246	0.00448129	-0.144311	0.00249496
X10078_5	BAG family molecular chaperone regulator 3	BAG3	BAG3	0	0	0.514512	0.557728	0.537866	0.0332125	0.332902	0.399979	0.0467277	0.174509	-0.241121	3.07e-06	-0.093275	0.0513509
X10003_15	Zinc finger protein 41	ZNF41	ZNF41	0	0	0.585212	0.569321	0.537821	0.143871	2.4951e-05	0.000593967	-0.0845363	0.0139092	-0.0745542	0.154618	-0.0393877	0.411451
X20215_45	Integrin alpha-V: beta-1 complex	Integrin aVb1	ITGAV|ITGB1	0	0	0.559108	0.578026	0.537721	-0.110045	0.00129463	0.00843724	-0.0155128	0.652303	0.0951332	0.0690788	0.0859061	0.072813
X14273_19	Prolyl endopeptidase	PPCE	PREP	0	0	0.509333	0.55803	0.537714	0.0162331	0.636096	0.971811	-0.19586	9.24e-09	-0.0299108	0.568408	0.0741344	0.121758
X14082_56	Talin-2	TLN2	TLN2	0	0	0.525384	0.547244	0.537673	0.0483215	0.158773	0.243532	0.06246	0.0694005	-0.0641096	0.221121	-0.174905	0.000238595
X4971_1	Cathepsin Z	CATZ	CTSZ	0	0	0.536357	0.530331	0.537624	-0.0722932	0.0348728	0.166858	-0.00824693	0.810702	0.0237411	0.650762	0.123556	0.0097267
X6359_50	Protein O-linked-mannose beta-1,4-N-acetylglucosaminyltransferase 2	AGO61	POMGNT2	0	0	0.515808	0.543894	0.537609	0.0226131	0.509786	0.359882	-0.045108	0.189945	-0.00490994	0.925417	0.00449952	0.925275
X7717_95	Cystic fibrosis transmembrane conductance regulator	CFTR	CFTR	0	0	0.523379	0.545908	0.537572	0.035497	0.300702	0.336402	-0.183927	7.13e-08	0.132549	0.0111377	0.255376	6.18895e-08
X6214_84	Interferon alpha-8	IFNA8	IFNA8	0	0	0.525899	0.53539	0.537572	-0.0471866	0.168798	0.509462	0.0800778	0.0198354	-0.0511163	0.329459	-0.0143843	0.76429
X12463_7	Kelch-like protein 13	KLH13	KLHL13	0	0	0.551421	0.562423	0.537524	-0.0851285	0.0129302	0.158779	0.087884	0.0105466	-0.0830984	0.112496	-0.0888802	0.0634032
X8391_12	Beta-defensin 115	DB115	DEFB115	0	0	0.516841	0.532468	0.537464	0.0309705	0.366585	0.185682	0.0249685	0.468283	-0.0892547	0.0881745	-0.12859	0.00711087
X5604_30	Heparanase	HPSE	HPSE	0	0	0.502274	0.537661	0.537431	-6.00805e-06	0.99986	0.40347	0.0803323	0.0194457	-0.108427	0.0381396	-0.141968	0.00293601
X6229_13	Chorionic somatomammotropin hormone	CSH	CSH1|CSH2	0	0	0.534245	0.582519	0.537416	0.0569023	0.0969487	0.262477	-0.0956265	0.00537478	0.0177583	0.734911	0.0638644	0.182666
X17231_1	Plastin-2	L-plastin	LCP1	0	0	0.524284	0.54204	0.537297	-0.0466428	0.173767	0.405481	0.00752481	0.827003	0.261587	3.85e-07	0.253857	7.45121e-08
X6400_33	Tumor protein p53-inducible protein 13	P5I13	TP53I13	0	-0.0388657	0.519158	0.578141	0.537278	0.0325604	0.342487	0.739163	-0.2818	6.59e-17	0.143557	0.00593642	0.262408	2.58183e-08
X4138_25	Interleukin-20	IL-20	IL20	0	0	0.527973	0.528808	0.53723	-0.0524755	0.12589	0.371726	0.0911329	0.00799455	0.0536906	0.305652	0.0508083	0.28925
X17789_1	Nicotinate-nucleotide pyrophosphorylase [carboxylating]	NADC	QPRT	0	0	0.517179	0.566715	0.53717	0.0281686	0.411549	0.641506	0.0734992	0.0325544	-0.173198	0.000876863	-0.124565	0.00914237
X13431_74	Membrane protein FAM159A	F159A	SHISAL2A	0	0	0.537514	0.523793	0.537122	-0.0727542	0.0337269	0.0674846	-0.0146102	0.671311	0.13625	0.00905725	0.229971	1.18014e-06
X21183_1	Dual specificity protein phosphatase 10	DUS10	DUSP10	0	0	0.526338	0.533704	0.537096	-0.0411167	0.230566	0.569537	-0.0611341	0.0755379	0.124646	0.0170435	0.192079	5.3106e-05
X21361_8	Protein TXNRD3NB	TR3N	TXNRD3NB	0	0	0.533432	0.534195	0.537088	0.0644479	0.0600582	0.245684	0.110009	0.00135194	-0.0232894	0.656979	-0.137042	0.00410267
X2381_52	Complement C5	C5	C5	0	0	0.503431	0.534765	0.537069	-0.0117914	0.731083	0.536959	0.0366944	0.286388	0.174283	0.000812549	0.12734	0.00769364
X12878_60	Oxysterol-binding protein-related protein 11	OSB11	OSBPL11	0	0	0.546526	0.530592	0.537055	0.082307	0.0162606	0.322423	0.087189	0.0111785	-0.153767	0.0031856	-0.255093	6.40734e-08
X13939_14	UTP--glucose-1-phosphate uridylyltransferase	UGPA1	UGP2	0	0	0.515877	0.569798	0.537032	0.0231352	0.500062	0.785278	-0.223947	4.46e-11	0.245987	1.9e-06	0.306013	6.31021e-11
X25292_6	Carboxylesterase 3	EST3	CES3	0	0	0.546194	0.556857	0.536954	-0.0784192	0.0220709	0.123971	0.00560218	0.87075	0.0527189	0.314502	0.020751	0.665309
X19335_2	Hematological and neurological expressed 1 protein	HN1	JPT1	0	0	0.505349	0.531667	0.536954	-0.0162745	0.635236	0.860556	-0.098346	0.00419366	0.221184	1.95e-05	0.235161	6.6351e-07
X21521_17	Tryptophan 5-hydroxylase 1	TPH1	TPH1	0	0	0.542806	0.532163	0.536913	0.075843	0.0268478	0.496596	-0.0129425	0.706987	-0.0205813	0.694734	-0.0332725	0.487842
X21289_36	Sperm-associated antigen 7	Sperm-associated antigen 7	SPAG7	0	0	0.528676	0.536377	0.536906	0.0604501	0.077816	0.0208753	0.0188369	0.584289	-0.201051	0.000107598	-0.160069	0.000784314
X23545_6	Nuclear distribution protein nudE-like 1	NDEL1	NDEL1	0	0	0.521261	0.54988	0.536894	-0.0278281	0.417228	0.453917	0.177726	1.96e-07	-0.0958398	0.0670306	-0.244424	2.29595e-07
X4474_19	Ubiquitin	Ubiquitin	RPS27A	0	0	0.535232	0.54099	0.536854	0.055454	0.105767	0.471419	-0.205872	1.5e-09	0.0658534	0.208788	0.178131	0.000181789
X9015_1	Proteoglycan 3	PRG3	PRG3	0	0	0.547018	0.579701	0.536842	0.0899662	0.00860143	0.00671112	0.0991684	0.00388596	-0.1274	0.0147316	-0.170652	0.000339023
X20994_37	Pleckstrin homology domain-containing family F member 2	PKHF2	PLEKHF2	0	0	0.511248	0.546474	0.536768	-0.023625	0.491028	0.547393	-0.049473	0.150511	0.109667	0.0359756	0.0870711	0.0689993
X3283_21	Transforming growth factor-beta-induced protein ig-h3	BGH3	TGFBI	0	0	0.519977	0.534579	0.536738	-0.0443134	0.196287	0.327201	-0.085467	0.0128907	0.266308	2.33e-07	0.346963	8.29805e-14
X2761_49	Fibroblast growth factor 18	FGF-18	FGF18	0	0	0.515918	0.532166	0.536734	-0.0306448	0.371649	0.757025	0.0145555	0.672471	0.0525367	0.316179	0.0395994	0.40894
X2753_2	Complement C1q subcomponent	C1q	C1QA|C1QB|C1QC	0	0	0.500058	0.540416	0.536719	-9.31914e-05	0.997833	0.516626	-0.13503	8.16e-05	0.179081	0.000577075	0.287794	8.83739e-10
X23187_9	Deubiquitinating protein VCIP135	VCIP1	VCPIP1	0	0	0.573773	0.580241	0.53666	0.130507	0.000133378	0.00294045	-0.120743	0.000432151	-0.0323621	0.537124	-0.116544	0.0147839
X23267_5	BTB/POZ domain-containing protein KCTD6	KCTD6	KCTD6	0	0	0.524417	0.524642	0.536626	-0.0445254	0.194154	0.156208	-0.0544204	0.113716	0.0845133	0.106486	0.149157	0.00176819
X18918_86	cAMP-specific 3',5'-cyclic phosphodiesterase 4A	PDE4A	PDE4A	0	0	0.519248	0.516199	0.536567	-0.0364192	0.288311	0.836445	0.0424895	0.216985	-0.0927944	0.0762261	-0.0307342	0.521655
X21190_4	Ubiquitin-conjugating enzyme E2 W	UBE2W	UBE2W	0	0	0.512079	0.503526	0.536567	-0.0125331	0.714883	0.0273607	0.131178	0.000130056	-0.0635363	0.225287	-0.122422	0.0104222
X7144_234	Kazal-type serine protease inhibitor domain-containing protein 1	KAZD1	KAZALD1	0	0	0.503356	0.540536	0.536559	0.00615488	0.857629	0.941838	-0.219802	1.03e-10	0.0905769	0.0835465	0.128125	0.00732299
X15623_1	Programmed cell death protein 1	PD-1	PDCD1	0	0	0.515139	0.553774	0.536526	-0.0281494	0.411869	0.57684	0.0461651	0.179761	0.169624	0.00112344	0.123694	0.00964475
X8409_3	R-spondin-2	RSPO2	RSPO2	0	0	0.509796	0.558342	0.536507	0.0204562	0.550986	0.639451	-0.206368	1.37e-09	0.0357083	0.495858	0.116484	0.0148356
X24922_19	NHL repeat-containing protein 2	NHLC2	NHLRC2	0	0	0.533794	0.540398	0.536444	0.0603124	0.0784961	0.281522	0.126182	0.000233756	-0.138156	0.00812726	-0.193946	4.47358e-05
X20585_9	CMRF35-like molecule 9	CLM9	CD300LG	0	0	0.514656	0.544735	0.536425	0.025536	0.456636	0.706499	-0.00699087	0.839105	-0.027243	0.60341	0.0877952	0.0667127
X13700_10	Annexin A2	annexin II	ANXA2	0	0	0.530065	0.529281	0.536366	-0.0649877	0.0579403	0.224427	0.0138488	0.687515	0.204241	8.3e-05	0.230365	1.13018e-06
X6035_2	Beta-galactoside alpha-2,6-sialyltransferase 1	SIAT1	ST6GAL1	0	0	0.581515	0.553383	0.536343	0.138077	5.2594e-05	0.00689505	0.115114	0.000795329	-0.202037	9.93e-05	-0.307129	5.33588e-11
X5364_7	Protein SET	SET	SET	0	0	0.500741	0.527591	0.536284	-0.00915063	0.789691	0.563915	-0.0901609	0.00869304	0.212983	3.99e-05	0.256507	5.38666e-08
X23675_16	Centrosomal protein of 76 kDa	CEP76	CEP76	0	0	0.543393	0.525428	0.536243	-0.0674652	0.0489994	0.0614859	0.122519	0.000354539	-0.108899	0.0373023	-0.217433	4.4899e-06
X25917_12	Beta-hexosaminidase alpha chain	Hexosaminidase A	HEXA	0	0	0.598191	0.541865	0.536176	-0.166579	1.01169e-06	6.66194e-06	-0.028317	0.410748	0.100139	0.0556152	0.257493	4.76953e-08
X8068_43	Uncharacterized family 31 glucosidase KIAA1161:Extracellular domain	K1161:ECD	MYORG	0	0	0.528427	0.564444	0.536142	-0.0460731	0.179088	0.143827	0.00335387	0.922403	0.0851234	0.103973	0.0803794	0.0933082
X13937_75	Cullin-associated NEDD8-dissociated protein 1	CAND1	CAND1	0	-0.0158848	0.536597	0.56233	0.536064	0.0639537	0.0620531	0.466311	-0.365194	4.36e-28	0.130799	0.0122612	0.297925	2.08402e-10
X14634_13	Lutropin-choriogonadotropic hormone receptor	LSHR	LHCGR	0	0	0.526911	0.541757	0.536049	0.0489024	0.153819	0.262683	-0.0134268	0.696556	-0.0890477	0.0889174	0.0775809	0.10532
X15388_24	Low affinity immunoglobulin gamma Fc region receptor III-A	FcRIIIa	FCGR3A	0.00202337	0	0.514136	0.512751	0.536031	-0.0199706	0.560483	0.138436	-0.0159222	0.643752	0.0133071	0.799712	0.169606	0.000369138
X22958_6	Destrin	DEST	DSTN	0	0	0.510143	0.533961	0.535982	0.0106711	0.755776	0.388434	-0.0893666	0.00930375	0.149888	0.00405344	0.216775	4.80566e-06
X4831_4	L-Selectin	sL-Selectin	SELL	0	0	0.520677	0.531638	0.535967	-0.0393334	0.251439	0.398334	0.0182875	0.5953	0.158826	0.00230762	0.12876	0.00703473
X18381_16	Aldehyde dehydrogenase, mitochondrial	ALDH-E2	ALDH2	0	0	0.517538	0.535238	0.535848	-0.0312868	0.361709	0.465103	0.00579963	0.866237	0.0619881	0.236816	-0.0138413	0.772941
X6651_74	PolyUbiquitin K48-linked	PolyUbiquitin K48	UBB	0	0	0.504675	0.552952	0.535822	0.00860592	0.801942	0.942484	-0.0950118	0.0056802	-0.106886	0.0409824	0.000946111	0.984266
X11383_41	Keratin, type II cytoskeletal 7	Keratin 7	KRT7	0	0	0.530591	0.553123	0.535815	-0.0483584	0.158455	0.650075	0.0757366	0.0276098	-0.0463358	0.376751	-0.0445956	0.352348
X23411_108	Paraneoplastic antigen Ma2	PNMA2	PNMA2	0	0	0.549029	0.535655	0.53574	0.0879153	0.0102474	0.244754	0.00940572	0.784717	-0.0151361	0.77289	0.0377008	0.431786
X23387_18	TIP41-like protein	TIPRL	TIPRL	0	-0.0643914	0.52326	0.558543	0.535696	0.0372275	0.277738	0.797626	-0.328262	1.05e-22	0.220394	2.1e-05	0.340966	2.33516e-13
X23649_6	Kelch-like protein 2	KLHL2	KLHL2	0	0	0.503964	0.554363	0.535625	0.0033685	0.92179	0.965455	-0.162025	2.17e-06	0.0603058	0.249807	0.104347	0.02918
X24444_10	Tetratricopeptide repeat protein 27	TTC27	TTC27	0	0	0.509258	0.558707	0.535614	-0.0170569	0.619063	0.98217	-0.0411923	0.231361	0.111329	0.033239	0.0572318	0.232495
X9942_2	NTF2-related export protein 1	NXT1	NXT1	0	0	0.515802	0.555007	0.535614	0.0240925	0.482489	0.430295	-0.0549612	0.110166	0.00602573	0.908536	-0.00134388	0.977652
X13745_10	Polycystin-2:Cytoplasmic domain 4	PKD2:CD 4	PKD2	0	0	0.506509	0.528079	0.535614	-0.00577364	0.866362	0.65315	0.0385073	0.263231	-0.0860209	0.100363	0.0256715	0.59251
X3069_52	Immunoglobulin M	IgM	IGHM	0	0	0.51034	0.540413	0.535599	-0.0137226	0.689171	0.674281	0.093107	0.0067283	0.0646219	0.217445	0.201544	2.1883e-05
X25941_4	2'-5'-oligoadenylate synthetase like protein	OA synthetase	OASL	0	0	0.604674	0.537352	0.535599	-0.185543	4.88902e-08	7.92674e-10	0.0221553	0.519876	0.0550141	0.293867	0.203669	1.78293e-05
X13089_6	Hypoxia-inducible factor 1-alpha	HIF-1a	HIF1A	0	0	0.526069	0.543093	0.535491	-0.0417002	0.224011	0.234921	0.0622116	0.070518	0.0616921	0.239067	0.040148	0.402475
X12507_16	Inositol-trisphosphate 3-kinase C	IP3KC	ITPKC	0	0	0.52926	0.533469	0.535446	-0.0510866	0.136236	0.47549	-0.0469018	0.172907	0.0314176	0.549075	0.137543	0.00396731
X14628_72	F-box only protein 3	FBX3	FBXO3	0	0	0.517523	0.538715	0.535439	-0.0399272	0.244347	0.466769	-0.0306157	0.373798	0.174583	0.000795533	0.152869	0.00134895
X10716_35	26S proteasome non-ATPase regulatory subunit 5	PSMD5	PSMD5	0	0	0.515976	0.522829	0.535439	-0.0263335	0.442693	0.622745	-0.107448	0.00175002	0.0177562	0.73494	0.149939	0.00167098
X13073_14	Acidic leucine-rich nuclear phosphoprotein 32 family member A	AN32A	ANP32A	0	0	0.580025	0.553134	0.535413	-0.130461	0.000134117	5.50305e-14	0.101621	0.00308595	-0.0141554	0.78724	0.0203051	0.672079
X17819_30	Acylpyruvase FAHD1, mitochondrial	FAHD1	FAHD1	0	0	0.500136	0.555863	0.535398	0.000504687	0.988264	0.954881	-0.0622876	0.0701746	-0.0322276	0.538818	-0.0720325	0.132724
X18267_74	Caspase recruitment domain-containing protein 17	CAR17	CARD17	0.00439618	0	0.523552	0.532494	0.53539	-0.0463934	0.176082	0.783836	0.0945928	0.00589722	-0.0146974	0.779301	0.0263978	0.582079
X10396_6	Induced myeloid leukemia cell differentiation protein Mcl-1	Mcl-1	MCL1	0	0	0.518944	0.555264	0.535379	0.0263809	0.441872	0.83475	-0.171454	5.26e-07	0.0978257	0.0615394	0.172975	0.000280114
X22076_34	Protein atonal homolog 1	ATOH1	ATOH1	0	0	0.509217	0.562966	0.535316	-0.0217668	0.525758	0.699845	0.0513646	0.135497	0.0352894	0.500931	0.0105729	0.825564
X17474_106	YEATS domain-containing protein 4	YETS4	YEATS4	0	0	0.529015	0.527345	0.535305	-0.0588481	0.0860366	0.194445	-0.0447718	0.193271	-0.0061996	0.905909	0.0580871	0.225577
X2949_6	Group 10 secretory phospholipase A2	GX	PLA2G10	0	0	0.540367	0.525301	0.535271	0.0737118	0.0314489	0.241817	0.126534	0.000224447	-0.250065	1.27e-06	-0.320298	6.98253e-12
X17837_5	Chloride intracellular channel protein 2	CLIC2	CLIC2	0	0	0.526584	0.539772	0.53523	-0.0531319	0.121216	0.113828	0.0417609	0.224979	0.0588281	0.26162	0.0944132	0.0485618
X24892_8	Testicular spindle-associated protein SHCBP1L	SHP1L	SHCBP1L	0	0	0.507178	0.551857	0.535212	-0.0216677	0.527645	0.481099	-0.0535383	0.1197	0.260001	4.56e-07	0.133478	0.00519284
X5097_14	Killer cell immunoglobulin-like receptor 3DS1	KI3S1	KIR3DS1	0	0	0.514292	0.522851	0.535156	0.0240941	0.48246	0.496035	0.00515439	0.881001	-0.0271972	0.604019	-0.0868163	0.0698192
X20955_20	tRNA-specific adenosine deaminase 2	ADAT2	ADAT2	0	0	0.531575	0.540632	0.53513	-0.0584914	0.0879591	2.02332e-14	0.0282287	0.412209	0.147042	0.00482055	0.0589614	0.218659
X11542_11	Transmembrane protein 230	TM230	TMEM230	0	0	0.525824	0.556697	0.535111	0.0524721	0.125914	0.404805	-0.0113442	0.741793	-0.170834	0.00103361	-0.170631	0.000339592
X17814_8	3'(2'),5'-bisphosphate nucleotidase 1	BPNT1	BPNT1	0	0	0.519453	0.542047	0.535104	0.0263892	0.441728	0.371073	-0.175507	2.79e-07	0.136274	0.00904528	0.162806	0.000634392
X2797_56	Apolipoprotein B	Apo B	APOB	0	0	0.522427	0.545792	0.53507	0.0390402	0.254992	0.0972111	-0.0152374	0.658079	0.0932132	0.0749037	0.0248913	0.603809
X5253_1	Calcium/calmodulin-dependent 3',5'-cyclic nucleotide phosphodiesterase 1A	PDE1A	PDE1A	0	0	0.506764	0.541705	0.535052	-0.00478876	0.888996	0.873567	0.0566726	0.0995025	-0.0890143	0.0890379	-0.156904	0.000998221
X17170_15	Calcitonin gene-related peptide 2	CALCB	CALCB	0	0	0.512787	0.532527	0.535044	-0.0223379	0.514953	0.887142	-0.0346292	0.314396	0.0555703	0.289006	0.113492	0.0176266
X13719_19	Serine/threonine-protein kinase PAK 4	PAK4	PAK4	0	0	0.507429	0.547926	0.535022	0.00938808	0.784367	0.0502983	0.112432	0.00105382	-0.1215	0.020067	-0.146971	0.00206786
X16594_44	Fas apoptotic inhibitory molecule 1	FAIM1	FAIM	0	0	0.558723	0.557129	0.535011	0.0932874	0.00643179	0.0461676	-0.118946	0.00052658	0.0469481	0.37047	0.0141996	0.76723
X21676_17	PAI-2	PAI-2	SERPINB2	0	0	0.531017	0.540171	0.534977	-0.0492695	0.150749	0.192963	0.0667397	0.0523203	-0.0984087	0.0599996	-0.0957668	0.0454109
X5356_2	Macrophage migration inhibitory factor	MIF	MIF	0	0	0.527866	0.579258	0.534959	0.0408352	0.233776	0.264168	-0.172698	4.33e-07	-0.0414391	0.429292	0.0762678	0.111363
X10722_13	Tyrosine-protein kinase SYK:Protein kinase domain	KSYK:Protein Kinase	SYK	0	0	0.568531	0.554437	0.534951	-0.114966	0.000773837	0.00323763	-0.0114893	0.73861	0.0333628	0.524606	0.0947015	0.0478757
X5252_33	Dual 3',5'-cyclic-AMP and -GMP phosphodiesterase 11A	PDE11	PDE11A	0	0	0.523671	0.576935	0.534854	-0.0293289	0.392545	0.0256953	0.0548359	0.110981	-0.0250142	0.633371	-0.0281944	0.556653
X9754_33	Ribosyldihydronicotinamide dehydrogenase [quinone]	Quinone reductase 2	NQO2	0	0	0.505908	0.540986	0.534854	0.0109031	0.750643	0.98013	-0.171811	4.97e-07	0.0880006	0.0927524	0.00730874	0.878911
X12517_52	Programmed cell death protein 5	TFAR19	PDCD5	0	-0.0643914	0.524111	0.615408	0.534847	0.041484	0.226424	0.807653	-0.349981	8.79e-26	0.212682	4.1e-05	0.390097	2.4683e-17
X13491_40	Retinal rod rhodopsin-sensitive cGMP 3',5'-cyclic phosphodiesterase subunit delta	PDE6D	PDE6D	0	0	0.516294	0.54462	0.534843	0.0271214	0.429159	0.816829	-0.235811	3.73e-12	0.139794	0.00739669	0.183034	0.000119161
X23558_33	Methyltransferase-like protein 2B	MET2B	METTL2B	0	0	0.513704	0.530532	0.534843	-0.0131138	0.702289	0.365429	0.0662986	0.0539003	0.0247321	0.637208	0.0194588	0.685
X23396_21	Twinfilin-2	TWF2	TWF2	0	-0.0643914	0.505766	0.57514	0.534817	0.00601116	0.860919	0.931768	-0.268144	2.13e-15	0.17605	0.000717072	0.304384	8.05088e-11
X21220_11	GTP-binding protein SAR1b	SAR1B	SAR1B	0	0	0.540882	0.54424	0.534761	-0.0636153	0.0634502	0.12738	0.0444359	0.196637	0.0574521	0.272961	0.0549134	0.251996
X10048_7	Core-binding factor subunit beta	PEBB	CBFB	0	0	0.552402	0.55628	0.534743	0.104694	0.00221456	0.00680018	0.0285454	0.406982	-0.127332	0.0147854	-0.240322	3.6933e-07
X6563_78	Heat shock 70 kDa protein 1A	HSP 70	HSPA1A	0	0	0.501889	0.54214	0.534728	-0.000618856	0.985609	0.861045	-0.137354	6.12e-05	0.275219	8.75e-08	0.268173	1.23647e-08
X11669_39	Solute carrier organic anion transporter family member 5A1	SO5A1	SLCO5A1	0	0	0.508931	0.527475	0.534653	-0.0141713	0.679563	0.211035	-0.0444187	0.19681	0.0350852	0.503413	0.0572013	0.232744
X23336_2	Putative potassium channel regulatory protein	KCNRG	KCNRG	0	0	0.538261	0.547252	0.534579	-0.0628021	0.066914	1.73144e-50	0.093479	0.00651088	-0.0463807	0.376288	0.0438448	0.360522
X20935_4	Phosducin-like protein 3	PDCL3	PDCL3	0	0	0.506582	0.540845	0.534575	0.00841954	0.806145	0.5746	-0.162492	2.03e-06	0.218628	2.45e-05	0.295913	2.78892e-10
X18413_24	ADP-ribosylation factor-like protein 4D	ARL4D	ARL4D	0	0.00453564	0.540202	0.534009	0.534534	-0.0745972	0.0294612	0.155237	-0.0928563	0.00687845	0.152922	0.00335883	0.168939	0.00038963
X20457_13	Cytochrome c oxidase assembly factor 4 homolog, mitochondrial	COA4	COA4	0	0	0.514309	0.539024	0.534501	0.0191518	0.576672	0.6105	-0.156208	5e-06	0.136653	0.00885325	0.171564	0.000314645
X9095_5	Mitochondrial fission regulator 1	MTFR1	MTFR1	0	0	0.53233	0.548536	0.53446	0.049787	0.146501	0.406907	0.0565789	0.100064	-0.088273	0.0917422	-0.0594626	0.214762
X12521_3	Cyclin-dependent kinase 4 inhibitor C	CDN2C	CDKN2C	0	0	0.570666	0.561499	0.534434	-0.113804	0.000875446	1.77932e-11	0.125344	0.000257384	0.0093777	0.858098	-0.0159654	0.739275
X17384_110	ATP-dependent 6-phosphofructokinase, muscle type	K6PF	PFKM	0	0	0.627416	0.547572	0.534367	-0.222475	5.14227e-11	1.46668e-08	-0.0313604	0.362282	0.109233	0.0367209	0.164165	0.000570262
X13665_35	Serine/threonine-protein phosphatase 2A regulatory subunit B'' subunit alpha	PP2A, subunit B	PPP2R3A	0	0	0.582542	0.545822	0.534359	0.145985	1.88725e-05	2.17172e-06	-0.110708	0.00125878	0.0507917	0.332543	0.0861325	0.0720587
X13932_45	Rho guanine nucleotide exchange factor 7	COOL-1	ARHGEF7	0	0	0.515921	0.540327	0.5343	0.033505	0.328659	0.517222	-0.0248892	0.469698	-0.0192767	0.713203	0.0462539	0.334714
X9991_112	EMILIN-3:region 2	EMIL3:region 2	EMILIN3	0	0	0.624871	0.564638	0.534285	-0.215955	1.89552e-10	7.07942e-08	0.046426	0.177311	0.115332	0.0273663	0.125385	0.00869088
X7638_30	Vesicular integral-membrane protein VIP36	Lectin, mannose-binding 2	LMAN2	0	0	0.500735	0.545494	0.534184	-0.00359733	0.916496	0.275567	0.143399	2.83e-05	-0.0195018	0.710004	-0.069969	0.144215
X10398_110	Ankyrin repeat domain-containing protein 1	ANKR1	ANKRD1	0	0	0.531529	0.55622	0.534099	-0.0457687	0.181981	0.218711	0.0339274	0.32431	-0.0100512	0.848026	-0.0560253	0.242506
X6925_26	Sorting nexin-8	SNX8	SNX8	0	0	0.523524	0.516563	0.53405	-0.040865	0.233435	0.796415	0.079197	0.021237	0.0369766	0.480669	-0.0211834	0.658771
X9581_4	Pre-mRNA-processing factor 6:region 2	PRP6:region 2	PRPF6	0	0	0.521779	0.566604	0.53402	0.0392973	0.251874	0.26751	-0.10208	0.00295386	0.0528748	0.31307	0.187849	7.78669e-05
X5691_2	Cysteine-rich secretory protein LCCL domain-containing 2	CRLD2	CRISPLD2	0	0	0.515553	0.55265	0.534002	0.0250618	0.465041	0.941558	0.1542	6.62e-06	-0.139134	0.00768379	-0.209747	9.80748e-06
X13933_276	NGFI-A-binding protein 1	NAB1	NAB1	0	0	0.524973	0.555848	0.533938	-0.0384441	0.262324	0.0159162	0.196565	8.16e-09	-0.150332	0.00394433	-0.283458	1.61186e-09
X18933_4	Protein-glutamine gamma-glutamyltransferase 4	TGM4	TGM4	0	0	0.531103	0.543268	0.533931	-0.0596562	0.0818064	0.405045	0.00337245	0.921975	0.0959102	0.0668291	0.0168655	0.725152
X19175_18	MARCKS-related protein	MARCKSL1	MARCKSL1	0	-0.0643914	0.504215	0.56227	0.53389	0.00220586	0.948737	0.947564	-0.23423	5.24e-12	0.133648	0.0104798	0.264145	2.07187e-08
X2937_10	Apolipoprotein E (isoform E3)	Apo E3	APOE	0	0	0.516143	0.535152	0.533816	0.0312149	0.362813	0.829432	0.0218991	0.524715	-0.0445902	0.395011	-0.208196	1.14428e-05
X19176_27	Protein FAM49B	FA49B	CYRIB	0	-0.0388657	0.50826	0.564742	0.533767	0.0124181	0.717386	0.965784	-0.207055	1.21e-09	0.141618	0.00665304	0.187948	7.71808e-05
X13236_25	Protein Wnt-3a	WNT3A	WNT3A	0	0	0.560618	0.549515	0.533756	-0.102479	0.00274674	0.0540721	-0.00209212	0.951549	0.133474	0.0105817	0.109163	0.0224724
X9025_5	Alpha-hemoglobin-stabilizing protein	AHSP	AHSP	0	0	0.530192	0.54892	0.53373	0.0448638	0.190782	0.502992	-0.158541	3.59e-06	0.14544	0.00530753	0.250275	1.14851e-07
X13994_1	rRNA 2'-O-methyltransferase fibrillarin	FBRL	FBL	0	0	0.517058	0.513436	0.533674	0.0222305	0.516975	0.233043	0.0126362	0.713614	0.0546153	0.297386	-0.0648893	0.175729
X14271_23	Ras-related protein Rab-6B	RAB6B	RAB6B	0	0	0.502453	0.53908	0.533562	0.00494147	0.88548	0.827345	-0.0927403	0.0069489	-0.11334	0.0301661	-0.0696041	0.146325
X8776_10	Erlin-1	ERLN1	ERLIN1	0	0	0.54705	0.540249	0.533514	0.077691	0.0233399	0.111774	-0.0458816	0.182452	-0.0780446	0.136159	0.114619	0.0165257
X18401_18	Alpha-ketoglutarate-dependent dioxygenase alkB homolog 3	ALKB3	ALKBH3	0	0	0.52	0.551373	0.533462	-0.0331329	0.334063	0.708752	0.00861332	0.802462	0.0487374	0.352493	0.158766	0.000866686
X21931_16	UB2L3/PolyUbiquitin K48	UB2L3/ PolyUbiquitin K48	UBE2L3|UBB	0	0	0.50462	0.501359	0.533462	-0.00498527	0.884472	0.875084	-0.0323876	0.346766	-0.0140302	0.789077	-0.0876938	0.0670294
X17796_15	Inositol monophosphatase 1	IMPA1	IMPA1	0	0	0.513893	0.577173	0.533432	0.0230139	0.502312	0.755073	-0.117057	0.000646214	0.0675271	0.197425	0.115906	0.0153423
X17683_2	COMM domain-containing protein 9	COMD9	COMMD9	0	0	0.542493	0.533101	0.533421	0.0784654	0.0219924	0.162283	0.159852	2.97e-06	-0.276873	7.27e-08	-0.329707	1.53468e-12
X23245_5	Speriolin-like protein	SPC1L	SPATC1L	0	0	0.576912	0.542888	0.533406	-0.131227	0.00012234	1.92987e-63	0.02553	0.458335	-0.000557035	0.991526	0.126738	0.00798954
X18909_11	Exosome complex component RRP43	EXOS8	EXOSC8	0	0	0.526775	0.530379	0.533395	-0.0517455	0.131249	0.190666	0.103212	0.00265025	-0.0261067	0.618606	-0.0336824	0.482493
X4569_52	VPS10 domain-containing receptor SorCS2	SORC2	SORCS2	0	0	0.502083	0.526571	0.53338	4.92362e-05	0.998855	0.991884	-0.0686416	0.0459429	0.00237161	0.963935	0.112172	0.0189964
X13066_42	Enhancer of mRNA-decapping protein 4	EDC4	EDC4	0	0	0.578822	0.566857	0.533361	-0.133277	9.5421e-05	0.000198819	-0.0541347	0.115628	0.0777695	0.13755	0.161391	0.000708231
X7799_3	Killer cell immunoglobulin-like receptor 2DL5A	KI2LA	KIR2DL5A	0	0	0.529211	0.558093	0.533328	0.0465093	0.175003	0.116902	-0.118546	0.000550016	-0.0490746	0.349167	0.0148752	0.756496
X3040_59	C-C motif chemokine 3	MIP-1a	CCL3	0.00583972	0	0.503498	0.533897	0.53332	0.0136337	0.691081	0.826581	0.0399453	0.245806	-0.0681467	0.193335	-0.0353569	0.46098
X19121_3	Ubiquilin-2	UBQL2	UBQLN2	0	-0.0643914	0.504638	0.56768	0.533287	0.00323975	0.92477	0.865595	-0.238924	1.9e-12	0.135761	0.00931063	0.242361	2.91912e-07
X17319_1	Selenoprotein H	SELH	SELENOH	0	0	0.543781	0.536976	0.533279	0.0796419	0.0200746	0.124012	0.029873	0.385505	0.0766896	0.143113	-0.0282145	0.556372
X18196_8	Afamin	Afamin	AFM	0	0	0.514028	0.565948	0.533212	-0.0258393	0.451304	0.759514	0.0937078	0.00638035	0.0884457	0.0911065	0.0931872	0.0515715
X11633_89	Activator of 90 kDa heat shock protein ATPase homolog 1	AHSA1	AHSA1	0	0	0.569763	0.563067	0.533194	0.120095	0.000443012	0.0284326	-0.358776	4.24e-27	0.146027	0.00512419	0.0830953	0.0827239
X11372_2	Zinc finger protein 18	ZNF18	ZNF18	0	0	0.504473	0.553127	0.533164	0.0216109	0.528728	0.161151	-0.0700819	0.04156	-0.209256	5.47e-05	-0.0776706	0.104917
X12859_33	Enoyl-CoA delta isomerase 2, mitochondrial	PECI	ECI2	0	0	0.503845	0.533004	0.533153	-0.00407996	0.905342	0.082636	-0.0014864	0.965566	-0.00825827	0.874888	-0.0682041	0.154635
X6931_10	Cancer/testis antigen 1	CTAG1A	CTAG1A	0	0	0.551685	0.53045	0.533138	-0.0904919	0.00821951	0.190126	-0.0288317	0.402292	0.150666	0.00386398	0.168893	0.000391085
X9749_190	Plastin-2	L-plastin	LCP1	0	0	0.515799	0.537818	0.533112	-0.0304475	0.374738	0.778089	-0.0106344	0.757425	0.266582	2.26e-07	0.262891	2.42897e-08
X7765_15	Integral membrane protein 2A	ITM2A	ITM2A	0	0	0.51174	0.543916	0.533097	-0.0161415	0.638001	0.810354	0.0135939	0.692971	0.0143989	0.783671	-0.0340251	0.478046
X8296_117	KDEL motif-containing protein 2	KDEL2	POGLUT3	0	0	0.549492	0.523481	0.533078	-0.0984194	0.00403347	0.00627918	0.0325213	0.344777	0.0103372	0.843756	0.0793099	0.0977627
X7181_17	Vesicle-associated membrane protein-associated protein B/C	VAPB	VAPB	0	0	0.503434	0.533324	0.533052	0.00104481	0.975706	0.51771	0.0647626	0.0597165	-0.0389911	0.457073	-0.144046	0.00254149
X11949_25	Epidermal growth factor:Cytoplasmic domain	EGF:CD	EGF	0	0	0.501779	0.514237	0.533034	-0.00601603	0.860808	0.975785	-0.0230801	0.502599	0.0751426	0.15138	0.148374	0.00187057
X10521_10	Matrix-remodeling-associated protein 8:Extracellular domain	MXRA8:ECD	MXRA8	0	0	0.535715	0.541347	0.533011	-0.0739717	0.0308539	0.0146805	-0.125224	0.000260933	0.304591	2.69e-09	0.424909	1.38411e-20
X12432_23	Calcyclin-binding protein	CYBP	CACYBP	0	-0.0643914	0.501852	0.56396	0.532993	-0.00422362	0.902026	0.710909	-0.22914	1.53e-11	0.127347	0.0147729	0.205521	1.4888e-05
X5134_52	Hepatitis A virus cellular receptor 2	TIMD3	HAVCR2	0	0	0.501157	0.538652	0.532985	-0.00786251	0.81874	0.430914	-0.191546	1.96e-08	0.204693	8e-05	0.2167	4.84301e-06
X3486_58	Fibroblast growth factor 1	b-ECGF	FGF1	0	0	0.524915	0.521098	0.532967	-0.0477704	0.163583	0.217646	0.0897941	0.00897049	0.00554543	0.915798	-0.00315574	0.947553
X8287_17	CMRF35-like molecule 2	CLM2	CD300E	0	0	0.510725	0.539683	0.532944	-0.0199578	0.560735	0.0154711	0.192521	1.66e-08	-0.00884168	0.86613	-0.129649	0.00664872
X10580_14	Surfactant-associated protein 2	SFTA2	SFTA2	0	0	0.521597	0.526474	0.532859	-0.0288877	0.399708	0.356326	-0.062999	0.0670254	-0.0143537	0.784333	0.199845	2.57379e-05
X20957_57	Diphosphoinositol polyphosphate phosphohydrolase 3-alpha	NUD10	NUDT10	0	0	0.53023	0.520208	0.532859	-0.0423213	0.217182	0.193702	0.0145347	0.672911	-0.081348	0.120296	0.059066	0.217841
X23002_27	Neurexophilin-1	NXPH1	NXPH1	0	0	0.505025	0.54109	0.532795	0.0124023	0.71773	0.914953	-0.0931529	0.00670108	-0.170076	0.00108905	-0.116073	0.0151941
X25898_4	Chitinase domain-containing protein 1	CHID1	CHID1	0	0	0.55618	0.556433	0.532777	0.0958338	0.00511602	0.0993094	-0.0487869	0.156259	-0.129524	0.0131411	-0.0456725	0.340831
X21184_1	Biogenesis of lysosome-related organelles complex 1 subunit 2	BL1S2	BLOC1S2	0	0	0.554653	0.550535	0.532777	0.0943021	0.00587483	0.0235116	0.0258623	0.452505	-0.0564678	0.281276	-0.191032	5.84306e-05
X18863_176	Carbohydrate sulfotransferase 2	CHST2	CHST2	0	0	0.517769	0.508712	0.532769	0.0270566	0.430263	0.686952	-0.0513707	0.135451	0.100464	0.0548228	0.0839832	0.0794816
X23274_27	EF-hand calcium-binding domain-containing protein 1	EFCB1	EFCAB1	0	0	0.591924	0.546157	0.532751	-0.16391	1.50982e-06	6.97445e-05	-0.0629839	0.0670911	0.169513	0.00113204	0.334817	6.59162e-13
X10882_12	Desmocollin-1	Desmocollin-1	DSC1	0	0	0.538243	0.529125	0.532743	-0.0541055	0.114537	0.0414275	-0.0624238	0.0695623	0.0629572	0.229552	0.15133	0.00151023
X18405_117	AP-1 complex subunit sigma-2	AP1S2	AP1S2	0	0	0.527959	0.528272	0.532743	0.0462131	0.177769	0.561609	0.069591	0.0430124	-0.108454	0.0380918	-0.182011	0.000130263
X7827_20	Disintegrin and metalloproteinase domain-containing protein 32	ADA32	ADAM32	0	0	0.505714	0.523805	0.532728	-0.0207078	0.546098	0.0930552	0.045241	0.188641	-0.0375164	0.474283	0.0133489	0.780808
X8867_18	Glycodelin	Glycodelin	PAEP	0	0	0.519948	0.561552	0.532717	0.0332457	0.332419	0.243205	-0.0077876	0.821062	-0.0613475	0.241705	-0.127671	0.00753564
X13453_2	39S ribosomal protein L33, mitochondrial	RM33	MRPL33	0	0	0.535197	0.559251	0.532717	0.0596203	0.0819903	0.241719	-0.0546668	0.112087	0.0549061	0.294817	0.162712	0.000639069
X7976_19	DOMON domain-containing protein FRRS1L	FRS1L	FRRS1L	0.00807438	0	0.517031	0.538641	0.532676	-0.0279918	0.414492	0.274601	0.0487208	0.156822	0.0282998	0.58943	0.159122	0.00084339
X19159_9	DNA polymerase delta subunit 4	DNA polymerase subunit delta 4	POLD4	0	0	0.510406	0.54243	0.532594	-0.0199829	0.560241	0.104582	-0.00549311	0.873245	-0.00924282	0.860118	0.0771941	0.107073
X5412_53	CD27 antigen	CD27	CD27	0	0	0.531925	0.531169	0.532576	-0.0625392	0.0680666	0.167714	0.018988	0.581277	0.225436	1.34e-05	0.241011	3.41179e-07
X11096_57	HemK methyltransferase family member 2	HEMK2	N6AMT1	0	0	0.519314	0.532714	0.532568	0.037543	0.273682	0.777378	-0.0178543	0.60405	-0.0887185	0.0901093	-0.0999674	0.0367057
X6390_18	Neuropeptide S	NPS	NPS	0	0	0.517274	0.517729	0.532561	-0.0351287	0.305748	0.135085	-0.0846773	0.0137506	0.256462	6.59e-07	0.303931	8.61313e-11
X13475_10	Ubiquitin-conjugating enzyme E2 D4	UB2D4	UBE2D4	0	-0.0643914	0.505997	0.541146	0.532557	0.00706211	0.836919	0.939366	-0.252697	8.62e-14	0.155008	0.00294587	0.278496	3.16651e-09
X21306_7	HAUS augmin-like complex subunit 1	HAUS1	HAUS1	0	0	0.574468	0.570766	0.532524	-0.129489	0.000150599	9.6206e-06	0.0333279	0.332938	0.121541	0.0200239	0.01107	0.817504
X2644_11	Protein kinase C alpha type	PKC-A	PRKCA	0	0	0.505902	0.556667	0.532516	0.00994077	0.772013	0.904143	0.0623457	0.0699129	-0.153469	0.00324586	-0.139384	0.00350401
X7960_53	POTE ankyrin domain family member G	POTEG	POTEG	0	0	0.517457	0.519646	0.532494	-0.0354596	0.301213	0.424151	0.0401734	0.243118	-0.0174004	0.740059	-0.0146748	0.759675
X17778_19	Ras-related protein Rab-32	RAB32	RAB32	0	0	0.518944	0.50866	0.532494	0.0299058	0.383298	0.931404	0.151283	9.91e-06	-0.142278	0.0064006	-0.261742	2.80778e-08
X2590_69	Inactive tyrosine-protein kinase transmembrane receptor ROR1	ROR1	ROR1	0	-0.0388657	0.535052	0.539277	0.532468	-0.0644376	0.0600992	0.378614	-0.0562994	0.101755	0.0260815	0.618945	0.153135	0.00132266
X21217_20	Prohibitin-2	PHB2	PHB2	0	0	0.568875	0.571481	0.532408	-0.117143	0.00061236	0.0272347	-0.00758162	0.825718	0.23973	3.51e-06	0.135216	0.00463231
X3350_53	Calcium/calmodulin-dependent protein kinase type II subunit alpha	CAMK2A	CAMK2A	0	0	0.533771	0.539512	0.53236	0.0607937	0.0761382	0.131922	-0.138194	5.51e-05	0.00678207	0.897115	0.0537128	0.262529
X13496_19	Hydroxymethylglutaryl-CoA synthase, cytoplasmic	HMCS1	HMGCS1	0	0	0.500521	0.535282	0.532326	-0.00827161	0.809485	0.562884	-0.121668	0.000389929	0.185603	0.000357381	0.211933	7.87572e-06
X11144_10	Beta-defensin 116	DB116	DEFB116	0	0	0.521116	0.523064	0.5323	0.0385477	0.26104	0.609394	0.0173132	0.615058	-0.117267	0.0248638	-0.128597	0.00710801
X24937_7	Rho GTPase-activating protein 26	RHG26	ARHGAP26	0	0	0.575651	0.573413	0.532282	-0.127759	0.000184729	1.12991e-05	0.0868294	0.0115184	-0.0532046	0.310058	-0.0363909	0.447967
X4807_13	Collagen alpha-1(VIII) chain	CO8A1	COL8A1	0	0	0.507195	0.503161	0.532263	-0.0225502	0.510964	0.41519	0.0926043	0.00703236	-0.0135433	0.796234	-0.0383287	0.42415
X6324_11	Deoxyribonuclease-1-like 2	DNSL2	DNASE1L2	0	0	0.504392	0.537527	0.532259	0.000949005	0.977933	0.591556	-0.161038	2.5e-06	0.307797	1.8e-09	0.304445	7.97846e-11
X13986_6	LanC-like protein 1	LANC1	LANCL1	0	0	0.512472	0.561164	0.532256	0.0241781	0.480932	0.986091	-0.129553	0.000157734	-0.123529	0.0180678	0.000324479	0.994603
X5265_12	GRB2-related adapter protein 2	GRB2-related adapter protein 2	GRAP2	0	0	0.512657	0.540253	0.532233	-0.00914743	0.789763	0.348059	0.0199249	0.562767	0.0565743	0.280368	0.0780393	0.103273
X6917_49	Leucine-rich repeat-containing protein 3	LRRC3	LRRC3	0	0	0.513375	0.531362	0.532222	-0.0205961	0.548265	0.342394	0.049686	0.14876	-0.0278958	0.594757	-0.064127	0.180869
X15686_49	Inhibin beta C chain	INHBC	INHBC	0	0	0.550791	0.550591	0.532215	-0.0853896	0.0126549	0.0755296	0.0110513	0.74823	0.175978	0.000720745	0.198375	2.9585e-05
X9183_7	Interferon alpha/beta receptor 1	IFN-a/b R1	IFNAR1	0	0	0.508948	0.556935	0.5322	0.00573191	0.867319	0.539811	-0.105153	0.00219518	0.038519	0.462544	0.0750935	0.116995
X21146_187	Tubby-related protein 1	TULP1	TULP1	0	0	0.547921	0.532561	0.532189	-0.0906737	0.00809096	0.0184427	0.0214131	0.53396	0.0834252	0.111085	0.127542	0.00759708
X9232_1	Roundabout homolog 4	ROBO4	ROBO4	0	0.0158498	0.527762	0.527509	0.532181	-0.052801	0.123555	0.484359	-0.123267	0.000325947	0.229413	9.29e-06	0.285811	1.16477e-09
X3636_37	Oxidized low-density lipoprotein receptor 1	OLR1	OLR1	0	-0.0388657	0.514428	0.580416	0.532166	0.0230633	0.501395	0.824201	-0.267153	2.72e-15	0.0517489	0.323501	0.212127	7.72277e-06
X9255_5	Interleukin-17C	IL-17C	IL17C	0	0	0.534344	0.531202	0.532133	-0.0592562	0.0838789	0.146046	-0.0622612	0.070294	0.0861724	0.0997641	0.103099	0.0311772
X12659_13	Obg-like ATPase 1	GTPB9	OLA1	0	0	0.509996	0.518287	0.532133	0.00737139	0.829884	0.6752	-0.209614	7.44e-10	0.246927	1.73e-06	0.328527	1.86129e-12
X22073_47	ATP synthase B chain, mitochondrial	AT5F1	ATP5PB	0	0	0.609777	0.562635	0.532107	-0.189932	2.31412e-08	6.3264e-09	0.102298	0.0028933	-0.0434599	0.407113	-0.0282334	0.556108
X2946_52	Complement factor D	Factor D	CFD	0	0	0.522586	0.542509	0.531999	-0.0472898	0.167868	0.0844185	-0.101194	0.0032135	0.480476	1.54e-22	0.505008	1.16425e-29
X12695_62	Kelch-like protein 12	KLH12	KLHL12	0	0	0.506825	0.512122	0.531988	0.012285	0.720288	0.721863	-0.0386356	0.261644	-0.0366871	0.484114	-0.0325332	0.497567
X13621_31	AP-2 complex subunit alpha-2	AP2A2	AP2A2	0	-0.0643914	0.512122	0.569359	0.531932	0.0158755	0.643551	0.775257	-0.245317	4.64e-13	0.0706853	0.177224	0.157538	0.000951506
X5012_67	Adenylate kinase isoenzyme 1	Myokinase, human	AK1	0	0	0.506078	0.532218	0.531924	0.00334123	0.922421	0.794358	-0.245892	4.07e-13	0.245502	2e-06	0.32295	4.57977e-12
X13423_94	Redox-regulatory protein FAM213A	CJ058	PRXL2A	0	0	0.538822	0.57724	0.531921	0.0632374	0.0650409	0.00969238	-0.18583	5.19e-08	0.0414043	0.429679	0.139669	0.00343675
X8876_51	Neurexin-2-beta	NRX2B	NRXN2	0	0	0.534329	0.540048	0.531921	0.0511749	0.13556	0.0517874	-0.042378	0.218195	-0.0219164	0.676019	0.0129391	0.787373
X3360_50	Serine/threonine-protein kinase Chk2	Chk2	CHEK2	0	0	0.539268	0.562799	0.531913	-0.0679582	0.0473656	0.178875	0.0484655	0.159009	0.0640161	0.221797	0.1049	0.0283321
X25967_34	Metalloproteinase inhibitor 1	TIMP-1	TIMP1	0	0	0.516106	0.528365	0.531865	-0.0316341	0.356402	0.679521	-0.0753415	0.0284326	0.209289	5.46e-05	0.350211	4.69474e-14
X19251_56	Serglycin	Platelet proteoglycan	SRGN	0	0	0.529984	0.523432	0.531839	0.0624925	0.0682731	0.0985175	0.118489	0.000553449	-0.215962	3.09e-05	-0.303481	9.20835e-11
X21491_7	Vascular adhesion protein-1	VAP-1	AOC3	0	0	0.50874	0.54243	0.531824	-0.024773	0.470203	0.183979	-0.0658434	0.0555727	0.377477	7.71e-14	0.372612	7.69154e-16
X8488_33	Integrin alpha-IIb: beta-3 complex	gpIIbIIIa	ITGA2B|ITGB3	0	0	0.508072	0.523112	0.531816	-0.00774712	0.821355	0.416373	-0.0265579	0.440435	-0.0276269	0.598314	-0.0385562	0.421402
X9070_1	Uncharacterized protein C17orf67	CQ067	C17orf67	0	0	0.528589	0.539147	0.531805	0.0457273	0.182376	0.783745	-0.112141	0.00108608	-0.0618278	0.238033	0.070632	0.140443
X2622_18	Heme oxygenase 2	HO-2	HMOX2	0	0	0.55296	0.517833	0.531805	0.0912455	0.00769836	0.180111	0.131773	0.000121105	-0.209771	5.24e-05	-0.339084	3.21623e-13
X19270_26	Tyrosine--tRNA ligase, cytoplasmic	SYYC	YARS1	0	0	0.529208	0.538879	0.531746	-0.0475579	0.165468	0.156894	0.0834861	0.0151432	-0.101933	0.051354	-0.112065	0.0191118
X15604_18	Mitogen-activated protein kinase 9	JNK2	MAPK9	0	0	0.565869	0.543376	0.531738	0.106718	0.0018126	0.0234346	-0.133872	9.4e-05	0.107705	0.0394505	0.0418405	0.382917
X15402_2	DNA-binding protein inhibitor ID-1	ID-1	ID1	0	0	0.607428	0.555978	0.531723	0.187468	3.52947e-08	1.94298e-07	-0.063405	0.0652806	-0.0785689	0.133539	-0.187206	8.24692e-05
X21384_2	Alpha-L-fucoside fucohydrolase	Alpha-L-fucosidase I	FUCA1	0	0	0.535825	0.528257	0.53169	-0.0668585	0.0510746	0.220994	-0.0304817	0.375894	0.0746862	0.153887	0.0221758	0.643864
X8545_14	Uncharacterized protein C17orf78:C-term	CQ078:C-term	C17orf78	0	0	0.524559	0.523473	0.531682	0.0505326	0.140542	0.479968	0.00276342	0.936032	-0.0957917	0.0671685	-0.0899315	0.0603263
X17447_52	Secreted frizzled-related protein 4	SFRP4	SFRP4	0	0	0.51301	0.562747	0.531645	-0.0228721	0.504949	0.238965	0.0422601	0.21948	0.00680313	0.896798	-0.00748067	0.876085
X5534_49	Tumor necrosis factor receptor superfamily member 10B:Extracellular domain, TNFR-Cys domains 1-3	TRAIL R2:ECD	TNFRSF10B	0	0	0.5032	0.528198	0.531623	-0.00728369	0.831877	0.759552	0.0220744	0.521401	-0.07993	0.126919	-0.0760082	0.112589
X11989_35	ER membrane protein complex subunit 1	EMC1	EMC1	0	0	0.508448	0.523715	0.531589	-0.00328251	0.92378	0.101021	-0.0804937	0.0192021	0.135768	0.00930691	0.156998	0.000991159
X25088_42	Phosphorylase b kinase regulatory subunit alpha, skeletal muscle isoform	PHKA1	PHKA1	0	0	0.500075	0.532606	0.531582	0.0105535	0.758385	0.507293	0.104104	0.00243143	-0.183928	0.000404795	-0.222847	2.54531e-06
X12759_47	Interleukin enhancer-binding factor 3	DRBP76	ILF3	0	0	0.520497	0.522673	0.531578	0.0294131	0.391189	0.440262	0.0900228	0.0087966	-0.007152	0.891537	-0.107279	0.0249178
X13545_97	Probable RNA-binding protein EIF1AD	EIF1A	EIF1AD	0	0	0.536395	0.530026	0.531548	0.0525314	0.125486	0.0946921	-0.0884851	0.010026	0.155675	0.00282392	0.0899636	0.0602343
X8356_88	Oxytocin-neurophysin 1	NEU1	OXT	0	0	0.526671	0.519862	0.531545	0.0446521	0.192886	0.25993	-0.0706351	0.0399731	0.0714221	0.17274	0.124561	0.00914469
X17808_37	Omega-amidase NIT2	NIT2	NIT2	0	0	0.521944	0.542505	0.531515	0.0455096	0.184469	0.453026	-0.1121	0.00109071	-0.116984	0.0252167	-0.0022825	0.962053
X12656_1	Kinesin light chain 1	KLC1	KLC1	0	0	0.556617	0.530595	0.531485	-0.0927	0.00677543	0.0232293	0.0283544	0.410131	0.011681	0.823759	0.0505038	0.292154
X4973_18	Baculoviral IAP repeat-containing protein 3	cIAP-2	BIRC3	0	0	0.517173	0.520644	0.531478	0.0307472	0.370052	0.612743	-0.0163554	0.634756	0.0030802	0.95317	-0.0589899	0.218436
X19768_13	Cystatin B	Cystatin B	CSTB	0	0	0.506868	0.551172	0.531429	0.0110492	0.747413	0.97091	-0.259544	1.72e-14	0.354776	2.69e-12	0.470802	1.72239e-25
X21691_27	Leucine-rich repeat and fibronectin type-III domain-containing protein 3	LRFN3	LRFN3	0	0	0.510519	0.546373	0.531418	0.0299153	0.383147	0.425394	0.0969405	0.00477105	-0.265199	2.62e-07	-0.244487	2.27913e-07
X21720_13	Alpha-(1,3)-fucosyltransferase 11	FUT11	FUT11	0	0	0.514523	0.54201	0.531411	0.0230181	0.502235	0.934139	-0.0554258	0.107185	-0.145902	0.00516258	-0.119192	0.0126525
X9053_16	Cysteine-rich protein 2	CRIP2	CRIP2	0	0	0.523107	0.533324	0.531388	0.0355067	0.30057	0.884113	-0.266584	3.13e-15	0.35623	2.16e-12	0.475814	4.50929e-26
X22806_1	THAP domain-containing protein 2	THAP2	THAP2	0	0	0.530658	0.566849	0.53134	0.0465957	0.174202	0.470434	-0.000483984	0.988785	0.0586069	0.263421	-0.0764051	0.110719
X22784_4	Spermatogenesis-associated protein 22	SPT22	SPATA22	0	0	0.513314	0.536712	0.531321	0.0216263	0.528433	0.684503	-0.0415402	0.227441	-0.0139679	0.789992	0.0196428	0.682183
X6409_57	Adhesion G protein-coupled receptor F5	GP116	ADGRF5	0	0	0.527247	0.528216	0.531295	0.043436	0.205301	0.601803	-0.102169	0.00292911	0.0642606	0.220033	0.0534985	0.26444
X6462_12	Metalloproteinase inhibitor 4	TIMP-4	TIMP4	0	0	0.524409	0.539136	0.53128	0.033799	0.32443	0.37493	-0.0776807	0.0238523	-0.0620874	0.236064	-0.0108308	0.82138
X3741_4	Interleukin-5	IL-5	IL5	0	0	0.505497	0.514762	0.53128	-0.00249707	0.941981	0.312557	0.0856708	0.0126766	-0.103747	0.0473277	-0.0442638	0.355947
X20986_58	Egl nine homolog 3	EGLN3	EGLN3	0	0	0.512949	0.520353	0.531277	-0.0276919	0.419511	0.71562	0.0118993	0.729639	0.0164474	0.753823	0.112121	0.019052
X22395_7	Tristetraproline	Tristetraproline	ZFP36	0	0	0.504805	0.528737	0.531254	0.00734857	0.830402	0.378189	0.0700179	0.0417468	-0.0267434	0.610071	-0.103697	0.0302069
X24688_9	Doublesex- and mab-3-related transcription factor B1	DMRTB	DMRTB1	0	0	0.504895	0.51319	0.531213	-0.00764782	0.823607	0.97378	0.036907	0.283604	-0.0573051	0.274192	0.0123415	0.796975
X24443_8	Mortality factor 4-like protein 2	MO4L2	MORF4L2	0	0	0.562872	0.566834	0.53121	-0.106439	0.00186363	0.0661455	-0.129184	0.000164768	0.325896	1.67e-10	0.371692	9.16459e-16
X21438_45	Tripartite motif-containing protein 5	TRIM5	TRIM5	0	0	0.53121	0.547438	0.53121	-0.0542291	0.11371	0.280972	0.155342	5.65e-06	0.0847016	0.105705	-0.013208	0.783063
X19555_1	Small ubiquitin-related modifier 2	SUMO2	SUMO2	0	0	0.555188	0.573108	0.531206	0.0967616	0.00470058	0.106459	-0.216523	1.96e-10	0.112418	0.0315438	0.134578	0.00483146
X2781_63	C-C motif chemokine 4-like	LAG-1	CCL4L1	0	0	0.507091	0.523883	0.531206	-0.0161708	0.637392	0.640335	-0.00438128	0.898745	0.0173301	0.741072	-0.00490865	0.918503
X7059_14	Leukocyte immunoglobulin-like receptor subfamily A member 6	LIRA6	LILRA6	0	0	0.536158	0.505912	0.531135	0.0595111	0.0825533	0.0661845	-0.00316077	0.926858	0.0245499	0.639691	0.00255881	0.957463
X3616_3	N-acetylglucosamine-6-sulfatase	GNS	GNS	0	0	0.506032	0.534877	0.531128	-0.0125707	0.714066	0.76072	0.0836936	0.0148921	-0.170707	0.00104274	-0.222099	2.75539e-06
X12537_88	Transcriptional activator protein Pur-alpha	PURA	PURA	0	0	0.506524	0.521731	0.531128	0.00872572	0.799244	0.214935	-0.0146811	0.669811	-0.0632711	0.227233	-0.07201	0.132845
X13722_105	Complement component C9	C9	C9	0	0	0.50705	0.555934	0.531113	-0.0166361	0.627739	0.813932	-0.0575928	0.0941185	0.285592	2.68e-08	0.291676	5.11474e-10
X21163_21	TBC1 domain family member 13	TBC13	TBC1D13	0	0	0.539299	0.532606	0.531113	-0.0739223	0.0309662	0.0124986	0.0800274	0.0199133	-0.0447066	0.393776	0.0258465	0.58999
X25058_23	Membrane-associated phosphatidylinositol transfer protein 3	PITM3	PITPNM3	0	0	0.514581	0.514918	0.531079	-0.0264714	0.440306	0.491585	-0.0136327	0.69214	0.00970067	0.853265	0.00964587	0.840644
X6520_87	Matrix Gla protein	MGP	MGP	0	0	0.518351	0.536299	0.531061	-0.0252828	0.461113	0.776063	-0.0473733	0.168624	0.264359	2.87e-07	0.433563	1.87199e-21
X7887_57	Cytochrome c oxidase subunit 5B, mitochondrial	COX5B	COX5B	0	0	0.504261	0.525566	0.531053	-0.0091328	0.790092	0.446208	-0.00759628	0.825386	0.0368719	0.481914	0.051342	0.284208
X14283_12	Ras-related protein Rab-14	RAB14	RAB14	0	0	0.555741	0.533723	0.53102	-0.105063	0.0021357	0.0150213	0.00106689	0.975281	-0.0182409	0.727988	-0.0438031	0.36098
X4128_27	C-C motif chemokine 24	Eotaxin-2	CCL24	0	0	0.543708	0.541965	0.531008	0.0707253	0.0390218	0.205508	0.00660513	0.847871	-0.0601	0.251429	-0.17948	0.000162032
X7092_7	Protein disulfide-isomerase-like protein of the testis	PDILT	PDILT	0	0	0.508153	0.534396	0.530982	-0.0121948	0.722257	0.631729	-0.0937514	0.00635572	-0.018935	0.718069	0.0218548	0.64867
X23395_5	KH domain-containing, RNA-binding, signal transduction-associated protein 2	KHDR2	KHDRBS2	0	0	0.505407	0.539739	0.530919	0.0166712	0.627013	0.302818	0.00596101	0.862551	-0.118437	0.0234473	-0.167491	0.000437819
X22529_31	PHD finger protein 6	PHF6	PHF6	0	0	0.510473	0.526921	0.530919	0.0119322	0.727998	0.0799881	0.0228922	0.506084	-0.00313615	0.952321	-0.143231	0.00269014
X21124_17	Yae1 domain-containing protein 1	YAED1	YAE1	0	0	0.526333	0.54144	0.530886	-0.0549807	0.108783	0.234152	-0.142598	3.14e-05	0.272432	1.19e-07	0.384752	7.22011e-17
X21909_2	Integrin a5b1	Integrin a5b1	ITGA5|ITGB1	0	0	0.514491	0.522967	0.530886	0.0235708	0.492022	0.934044	-0.000796703	0.98154	-0.0842948	0.107397	-0.15228	0.0014087
X24954_83	AP-1 complex subunit beta-1	AP1B1	AP1B1	0	0	0.50802	0.564169	0.530848	0.0127797	0.709524	0.785201	-0.143732	2.71e-05	0.083691	0.109947	0.075084	0.117041
X12632_14	Arylamine N-acetyltransferase 1	ARY1	NAT1	0	0	0.533215	0.55708	0.530826	0.0566125	0.0986644	0.608521	-0.15607	5.1e-06	0.0304642	0.56127	0.163534	0.000599272
X9997_12	UBX domain-containing protein 4:Cytoplasmic domain 1	UBXN4:CD 1	UBXN4	0	-0.0214538	0.523364	0.567274	0.530804	0.0361335	0.292114	0.953707	-0.268686	1.86e-15	0.211833	4.4e-05	0.343106	1.6185e-13
X3796_79	Angiopoietin-related protein 4	ANGL4	ANGPTL4	0	0	0.519138	0.53618	0.530785	0.0360419	0.293339	0.710552	0.0291575	0.396994	-0.201382	0.000104759	-0.25507	6.4256e-08
X9297_12	UDP-GlcNAc:betaGal beta-1,3-N-acetylglucosaminyltransferase 8	B3GN8	B3GNT8	0	0	0.524961	0.525424	0.530785	-0.053389	0.119424	0.0817161	-0.0358008	0.298294	0.258381	5.4e-07	0.197839	3.1119e-05
X12514_16	tRNA (guanine-N(7)-)-methyltransferase	METTL1	METTL1	0	0	0.550817	0.533641	0.530759	-0.0810263	0.0180059	0.0788206	-0.0773227	0.0245088	-0.0171113	0.744226	0.0504666	0.29251
X18259_15	Homeobox protein MOX-2	MEOX2	MEOX2	0	0	0.50988	0.549966	0.530733	-0.0160885	0.639106	0.189788	0.0415015	0.227875	0.016582	0.751875	0.0121256	0.800452
X10702_1	Collagen alpha-1(XXVIII) chain	COSA1	COL28A1	0	0	0.521912	0.537032	0.530733	-0.0467196	0.173058	0.174659	-0.117662	0.000605379	0.35894	1.43e-12	0.438844	5.36648e-22
X10584_7	NADH dehydrogenase [ubiquinone] iron-sulfur protein 4, mitochondrial	NDUS4	NDUFS4	0	0	0.555087	0.544675	0.530718	-0.109687	0.00134297	0.00156241	0.0268895	0.434747	0.0143467	0.784435	0.112143	0.0190273
X4428_1	Carbohydrate sulfotransferase 2	CHST2	CHST2	0	0	0.531448	0.524516	0.530651	0.058043	0.0904252	0.51486	0.149908	1.19e-05	-0.191971	0.000220347	-0.257413	4.81693e-08
X17510_7	Signal recognition particle 14 kDa protein	SRP14	SRP14	0	0	0.525523	0.541671	0.530644	-0.0452328	0.187156	0.54647	-0.018877	0.583489	0.0593019	0.257791	-0.00468838	0.922148
X18226_148	Cytochrome c oxidase subunit 5A, mitochondrial	COX5A	COX5A	0	-0.0214538	0.51739	0.541954	0.530592	0.0277345	0.418796	0.606794	-0.339855	2.57e-24	0.192005	0.00021977	0.383029	1.01627e-16
X21128_2	CDK2	CDK2	CDK2	0	0	0.510325	0.537457	0.530592	-0.0259738	0.448952	0.463467	0.0496658	0.148925	0.0675415	0.197329	-0.0631292	0.187764
X20079_6	Phosphoenolpyruvate carboxykinase [GTP], mitochondrial	PCKGM	PCK2	0	0	0.528691	0.554806	0.530573	-0.054088	0.114655	0.316432	-0.011866	0.730367	0.122385	0.019172	0.158699	0.000871141
X9758_17	40S ribosomal protein S4, X isoform	RS4X	RPS4X	0	0	0.505494	0.52128	0.530539	-0.00767694	0.822946	0.5587	0.155612	5.44e-06	-0.0935745	0.0737781	-0.248726	1.38205e-07
X24698_12	Pre-mRNA-splicing factor 18	PRP18	PRPF18	0	0	0.514659	0.530867	0.530517	-0.0318621	0.352943	0.00582582	0.0816341	0.0175551	0.109744	0.0358446	-0.0826307	0.0844624
X22526_81	Pyruvate dehydrogenase E1 component beta subunit	PDHB	PDHB	0	0	0.552593	0.544813	0.530506	-0.0873028	0.0107905	0.089574	0.0623546	0.0698731	-0.0156134	0.765934	0.0355702	0.458279
X8280_238	Vitronectin	Vitronectin	VTN	0	0	0.517448	0.551198	0.530484	-0.037294	0.276879	0.30827	0.102437	0.00285509	0.148123	0.00451495	0.0684565	0.153111
X22954_10	Chloride intracellular channel protein 2	CLIC2	CLIC2	0	0	0.509799	0.539091	0.530435	-0.0255246	0.456836	0.281552	0.0788095	0.0218805	0.0144096	0.783513	0.0300488	0.530988
X20542_47	Calcitonin receptor	CALCR	CALCR	0	0	0.561301	0.587646	0.530312	-0.0999547	0.00349341	0.0696439	0.131101	0.000131253	0.0495634	0.344383	-0.0420966	0.380009
X8759_29	Lactosylceramide 4-alpha-galactosyltransferase	a1,4-Galactosyltransferase	A4GALT	0	0	0.520865	0.536221	0.530301	0.0254805	0.457615	0.362414	-0.0748802	0.0294203	0.172093	0.000947148	0.283459	1.6115e-09
X10445_20	Apolipoprotein M	ApoM	APOM	0	0	0.523564	0.543354	0.530275	-0.0446734	0.192674	0.515295	0.0605791	0.0782349	0.0551924	0.292303	0.0585063	0.222241
X20093_9	Vascular cell adhesion protein 1	VCAM-1	VCAM1	0	0	0.506287	0.562132	0.530268	-0.0153046	0.655527	0.674828	-0.0567763	0.0988837	0.114162	0.0289832	0.170051	0.000356039
X2625_53	Hsp90alpha	HSP 90a	HSP90AA1	0	-0.0214538	0.50153	0.56036	0.53026	-0.00171809	0.960062	0.867281	-0.278521	1.55e-16	0.200848	0.000109376	0.362481	5.13976e-15
X4961_17	Annexin A2	annexin II	ANXA2	0	0	0.540946	0.536898	0.530238	-0.0845713	0.0135356	0.138338	0.0158995	0.644225	0.213368	3.86e-05	0.23644	5.74582e-07
X9057_19	Proteasomal ubiquitin receptor ADRM1	ADRM1	ADRM1	0	0	0.555958	0.540554	0.530223	-0.0887635	0.00953544	0.0451237	0.00675278	0.844513	0.0185141	0.724078	-0.0108965	0.820315
X22469_103	Homeobox protein HMX2	HMX2	HMX2	0	0	0.574097	0.535625	0.530175	-0.129626	0.000148166	0.00143223	0.000438471	0.98984	0.090491	0.0838412	0.234469	7.1704e-07
X23967_8	PAXIP1-associated protein 1	PA1	PAGR1	0	0	0.502806	0.545033	0.53016	0.00335655	0.922067	0.828502	0.0731507	0.0333892	0.0833331	0.111481	0.0321067	0.503223
X25111_24	E3 ubiquitin-protein ligase RAD18	RAD18	RAD18	0	0	0.509394	0.522971	0.530141	-0.00629754	0.854366	0.238252	-0.00123945	0.971284	-0.00894394	0.864597	-0.109198	0.0224287
X3192_3	Cytosolic non-specific dipeptidase	Glutamate carboxypeptidase	CNDP2	0	0	0.520113	0.509158	0.530137	0.0390442	0.254943	0.717722	0.15516	5.79e-06	-0.173134	0.00088078	-0.313069	2.1588e-11
X12892_10	Synaptotagmin-like protein 1	SYTL1	SYTL1	0	0	0.535857	0.517453	0.530122	-0.0651108	0.0574661	0.456122	0.0432138	0.209243	0.0651494	0.213706	0.00297239	0.950596
X21583_14	60S ribosomal protein L26-like 1	RL26L	RPL26L1	0	0	0.542994	0.537397	0.530104	-0.074134	0.0304873	0.311845	0.110193	0.0013268	-0.0114656	0.826957	-0.0704076	0.141711
X17843_30	Phosphopantothenate--cysteine ligase	PPCS	PPCS	0	0	0.508286	0.530744	0.530081	-0.0249587	0.46688	0.497099	0.05562	0.105959	0.112106	0.032021	0.117679	0.0138339
X21742_43	OTU domain-containing protein 7B	OTU7B	OTUD7B	0	0	0.526651	0.551853	0.530067	-0.0478204	0.163143	0.390508	-0.054719	0.111745	0.147791	0.0046068	0.194772	4.14435e-05
X15481_45	Antibacterial protein LL-37	LL-37	CAMP	0	0	0.542618	0.55106	0.530041	-0.0687241	0.0449186	0.215279	-0.0270769	0.43155	0.11201	0.0321692	0.21462	5.99596e-06
X25902_27	Glutamate dehydrogenase 1, mitochondrial	DHE3	GLUD1	0	0	0.51533	0.532561	0.530007	-0.0317862	0.354093	0.0170274	-0.0890399	0.00956583	0.174276	0.000812958	0.217254	4.57354e-06
X19230_12	Glutathione S-transferase theta-1	GSTT1	GSTT1	0	0	0.524282	0.524013	0.530007	0.0386678	0.259556	0.72108	-0.0316688	0.357577	-0.0169492	0.746565	0.0414157	0.387771
X20128_1	cAMP response element-binding protein	CREB1	CREB1	0	0	0.522375	0.537077	0.529992	0.0326888	0.340585	0.693143	0.0414008	0.229007	0.0124115	0.812935	-0.0594532	0.214835
X4900_8	C3a anaphylatoxin	C3a	C3	0	0	0.519427	0.533857	0.529981	-0.0351043	0.306085	0.788853	-0.10657	0.00190953	0.275416	8.56e-08	0.322462	4.95101e-12
X21430_4	Cytosolic phospholipase A2 alpha	cPLA2-alpha	PLA2G4A	0	0	0.511355	0.546768	0.529973	-0.0296367	0.387595	0.504622	-0.0477131	0.165586	0.247785	1.59e-06	0.298624	1.8822e-10
X5581_28	Fibrinogen-like protein 1	FGL1	FGL1	0	0	0.507886	0.540684	0.52994	0.00637544	0.852585	0.297725	-0.0653654	0.0573748	0.0268242	0.608991	-0.0390037	0.41603
X12993_21	Nuclear protein localization protein 4 homolog	NPL4	NPLOC4	0	0	0.504915	0.534478	0.529921	0.00795643	0.816613	0.999768	-0.244786	5.22e-13	0.147152	0.00478862	0.241744	3.13513e-07
X8062_15	Protein eva-1 homolog B	F176B	EVA1B	0	0	0.519844	0.553179	0.529854	-0.0266543	0.437154	0.527117	-0.0294576	0.39215	0.0460098	0.380121	0.132627	0.00548909
X15669_7	Serine/threonine-protein kinase B-raf	BRAF1	BRAF	0	0	0.521255	0.545256	0.529795	-0.0250198	0.46579	0.0174908	0.0817024	0.0174605	-0.0997732	0.0565198	-0.0914837	0.0560101
X3175_51	A disintegrin and metalloproteinase with thrombospondin motifs 13	ATS13	ADAMTS13	0	0	0.512021	0.525692	0.529746	-0.0242383	0.479841	0.67899	0.0606993	0.0776442	0.114451	0.028576	0.114376	0.0167575
X2835_1	X-ray repair cross-complementing protein 6	Ku70	XRCC6	0	0	0.506044	0.528421	0.52972	-0.00152509	0.964545	0.0130854	0.127498	0.000200707	-0.154368	0.00306736	-0.112718	0.0184195
X3405_6	Ubiquitin-fold modifier-conjugating enzyme 1	UFC1	UFC1	0	-0.0643914	0.506648	0.576574	0.529691	0.0086526	0.80089	0.959895	-0.283217	4.54e-17	0.234667	5.69e-06	0.382733	1.07756e-16
X19233_75	Copper transport protein ATOX1	ATOX1	ATOX1	0	-0.0388657	0.502326	0.547661	0.52959	0.00287935	0.933118	0.969972	-0.286613	1.85e-17	0.27948	5.41e-08	0.417187	7.86186e-20
X13969_24	Importin subunit alpha-7	IMA7	KPNA6	0	0	0.555556	0.528265	0.529579	-0.087882	0.0102763	0.0156233	-0.0940678	0.00617969	0.158079	0.00242154	0.178424	0.000177313
X12395_86	Aspartate--tRNA ligase, mitochondrial	SYDM	DARS2	0	0	0.509981	0.556358	0.529568	-0.0237763	0.488256	0.904899	0.123782	0.000307489	-0.0324956	0.535446	-0.0911013	0.0570491
X9037_1	Syntaxin-18	STX18	STX18	0	0	0.506093	0.520796	0.529568	-0.00572845	0.867399	0.74339	-0.0404074	0.240382	0.0298454	0.569254	0.112369	0.0187869
X12581_39	Inositol monophosphatase 2	IMPA2	IMPA2	0	0	0.507704	0.539594	0.529545	-0.00536278	0.875792	0.642959	-0.0295723	0.390308	-0.0414001	0.429726	0.152078	0.00142969
X22365_52	Cyclic AMP-dependent transcription factor ATF-5	ATF5	ATF5	0	0	0.524389	0.510599	0.529538	-0.048894	0.153889	0.150535	-0.0589259	0.0867351	0.151654	0.00363478	0.116955	0.0144334
X6408_2	Inhibin beta C chain	INHBC	INHBC	0	0	0.515923	0.533425	0.52953	-0.0366796	0.284875	0.374715	0.0720534	0.0361376	0.16141	0.00195015	0.146003	0.00221484
X15526_33	Glutathione synthetase	GSHB	GSS	0	-0.0643914	0.524742	0.593022	0.52949	0.0402714	0.240301	0.714972	-0.25986	1.6e-14	0.103314	0.0482626	0.165051	0.000531769
X16060_99	Nidogen-2	NID2	NID2	0	0	0.511054	0.539028	0.52946	-0.0256711	0.454256	0.389636	0.0493865	0.151227	0.0335729	0.521997	0.0327969	0.494085
X6625_31	ATPase family AAA domain-containing protein 1	ATAD1	ATAD1	0	0	0.546547	0.537096	0.52946	0.0923861	0.00696578	0.0322156	0.120144	0.000461684	-0.22552	1.33e-05	-0.355785	1.73941e-14
X12667_2	Guanine deaminase	GUAD	GDA	0	0	0.522826	0.58138	0.52943	0.0408887	0.233164	0.787944	-0.241546	1.07e-12	0.0181479	0.72932	0.0261549	0.585558
X24955_116	Zinc fingers and homeoboxes protein 2	ZHX2	ZHX2	0	0	0.520928	0.533633	0.529404	0.0442403	0.197028	0.340586	0.156533	4.78e-06	-0.214812	3.41e-05	-0.219336	3.68365e-06
X16785_45	Defensin-5	HD-5	DEFA5	0	0	0.509264	0.543223	0.529396	-0.00890649	0.795176	0.574327	-0.0801916	0.0196602	0.295958	7.81e-09	0.292805	4.35578e-10
X7148_42	Protein FAM173A	F173A	ANTKMT	0	0	0.538967	0.54125	0.529393	-0.0686336	0.0452019	0.36138	-0.0639014	0.0631987	0.0385127	0.462618	0.189414	6.76483e-05
X21658_15	Prohibitin-2	PHB2	PHB2	0	0	0.515854	0.519441	0.529378	-0.0195138	0.569488	0.502966	0.0281864	0.41291	-0.133828	0.0103751	-0.154482	0.00119697
X9828_86	L-lactate dehydrogenase C chain	LDHC	LDHC	0	0	0.527105	0.534512	0.529344	0.0385805	0.260634	0.555565	0.0148379	0.666495	0.0284469	0.587495	-0.0893973	0.0618741
X5634_39	GDP-fucose protein O-fucosyltransferase 1	OFUT1	POFUT1	0	0	0.53211	0.508339	0.529344	-0.0660924	0.0537993	0.0448715	-0.0294115	0.392892	0.0245693	0.639426	0.0403047	0.40064
X4963_19	cAMP-regulated phosphoprotein 19	ARP19	ARPP19	0	0	0.532744	0.525852	0.529337	0.0466753	0.173466	0.217165	0.0441066	0.199978	-0.0716287	0.171498	-0.185899	9.26313e-05
X12376_85	Cyclin-dependent kinase 4 inhibitor D	p19-INK4d	CDKN2D	0	0	0.508239	0.552207	0.529326	0.0196562	0.566673	0.162612	0.0435681	0.20553	-0.150215	0.00397282	-0.202089	2.07675e-05
X23624_34	Gamma-secretase subunit PEN-2	PEN2	PSENEN	0	0	0.542887	0.527837	0.529326	-0.0808898	0.0182012	0.0215463	0.0414664	0.228269	0.0524693	0.316802	0.0175856	0.713922
X22465_43	Transcription factor HES-1	HES1	HES1	0	0	0.551453	0.549835	0.529322	-0.0879082	0.0102535	7.9479e-47	0.0421054	0.221174	0.00387501	0.941106	0.124756	0.00903553
X11566_48	Keratin, type II cytoskeletal 72	Keratin 72	KRT72	0	0	0.538099	0.533894	0.529203	0.0732857	0.0324458	0.135646	0.0107522	0.754823	-0.0219997	0.674857	-0.169167	0.00038252
X23334_21	Late cornified envelope protein 3C	LCE3C	LCE3C	0	0	0.513765	0.541794	0.529184	0.020492	0.55029	0.300367	-0.101306	0.0031796	-0.0655413	0.210958	0.0694281	0.14735
X19136_22	Methylmalonate-semialdehyde dehydrogenase [acylating], mitochondrial	MMSA	ALDH6A1	0	0	0.530091	0.514143	0.529177	-0.0460776	0.179045	0.492356	-0.0809719	0.0184957	0.0579969	0.268432	0.158525	0.000882729
X21476_43	Endonuclease 8-like 2	NEIL2	NEIL2	0	0	0.500107	0.54048	0.529151	0.000818252	0.980973	0.993945	0.0384235	0.264273	0.0621824	0.235347	-0.077714	0.104722
X20380_50	Protein LSM12 homolog	LSM12	LSM12	0	0	0.517813	0.53539	0.529125	0.0371672	0.278517	0.245587	0.00591391	0.863627	-0.0472313	0.367589	-0.0418481	0.382831
X21234_7	Ankyrin repeat and SOCS box protein 13	ASB-13	ASB13	0	0	0.562464	0.549243	0.52911	-0.110523	0.00123257	0.0120242	-0.0860045	0.0123329	0.146057	0.00511486	0.277244	3.74681e-09
X9854_36	Aldose reductase	Aldose reductase	AKR1B1	0	0	0.513849	0.571801	0.529058	0.0155417	0.650543	0.612722	-0.221748	6.96e-11	0.235547	5.24e-06	0.349925	4.93725e-14
X9713_67	Platelet-derived growth factor receptor-like protein	PGFRL	PDGFRL	0	0	0.531867	0.521526	0.529035	-0.0573709	0.0942246	0.0946398	0.0646391	0.0602058	-0.0126407	0.809545	0.0375141	0.434071
X4909_68	Galectin-8	Galectin-8	LGALS8	0	0	0.521475	0.543652	0.529009	0.0214941	0.530959	0.069041	-0.0617125	0.0728081	-0.0265844	0.612197	0.0180058	0.707396
X14099_20	Proteasome subunit alpha type-4	PSA4	PSMA4	0	0	0.522575	0.545472	0.529002	0.0311592	0.363671	0.407869	-0.206331	1.38e-09	0.154231	0.00309399	0.195913	3.72734e-05
X7924_7	T-cell surface glycoprotein CD3 gamma chain	CD3G	CD3G	0	0	0.57373	0.552237	0.528991	-0.123281	0.000309814	0.00401849	0.0108841	0.751914	0.139492	0.00752682	0.112591	0.0185516
X7219_152	Heat shock 70 kDa protein 1A	HSP 70	HSPA1A	0	0	0.528245	0.539504	0.528976	0.052767	0.123797	0.258192	0.0520919	0.130042	-0.0421276	0.421658	-0.192774	4.983e-05
X17794_6	Phosphomannomutase 2	Phosphomannomutase 2	PMM2	0	0	0.537853	0.525748	0.528968	-0.0734443	0.0320717	0.130722	-0.00215083	0.950191	0.142206	0.0064279	0.151283	0.0015154
X13472_35	Haloacid dehalogenase-like hydrolase domain-containing protein 2	HDHD2	HDHD2	0	0	0.52245	0.561246	0.528961	0.0345419	0.313903	0.705986	-0.149483	1.27e-05	-0.00443449	0.932622	0.0752195	0.11638
X10752_8	Chromodomain Y-like protein 2	CDYL2	CDYL2	0	0	0.520694	0.541671	0.528961	-0.0329913	0.336134	0.449488	0.123291	0.000325056	-0.110435	0.0346874	-0.0565871	0.237807
X19809_47	DNA-directed RNA polymerase II subunit RPB9	RPB9	POLR2I	0	0	0.517972	0.522483	0.528953	-0.0224525	0.512798	0.495257	-0.00710875	0.83643	-0.107423	0.0399722	0.03522	0.462719
X2974_61	Contactin-1	contactin-1	CNTN1	0	0	0.507441	0.532758	0.528942	0.0193586	0.572563	0.477571	0.00199865	0.953711	-0.0351131	0.503074	-0.0474429	0.322424
X12764_3	Engulfment and cell motility protein 1	ELMO1	ELMO1	0	0	0.525181	0.562601	0.528901	-0.0509636	0.137184	0.0072981	0.0271138	0.430923	0.211103	4.69e-05	0.255918	5.79123e-08
X4500_50	Stem cell growth factor-alpha	SCGF-alpha	CLEC11A	0	0	0.52819	0.52013	0.528901	-0.0530132	0.122051	0.234164	-0.0635216	0.0647864	0.10931	0.0365874	0.188708	7.20887e-05
X12406_119	GTP-binding protein Di-Ras3	ARHI	DIRAS3	0	0	0.516496	0.515592	0.52889	-0.0360619	0.29307	0.84768	-0.0442541	0.198476	-0.102972	0.0490149	0.0128396	0.788971
X12437_18	Serine/threonine-protein kinase ULK3	ULK3	ULK3	0	0	0.52677	0.527833	0.528868	0.0579241	0.0910879	0.249736	0.0571432	0.0967193	-0.0547747	0.295976	-0.181345	0.000138002
X12784_10	Amyloid beta A4 precursor protein-binding family B member 3:Phosphotyrosine Interaction Domain 1,Isoform II	APBB3:PID 1	APBB3	0	0	0.540853	0.522639	0.528849	0.071288	0.0374869	0.342931	0.167946	8.99e-07	-0.216888	2.85e-05	-0.319884	7.45579e-12
X13518_5	Arf-GAP with SH3 domain, ANK repeat and PH domain-containing protein 2	ASAP2	ASAP2	0	0	0.571062	0.540442	0.528827	-0.123695	0.000295577	0.00316327	-0.052183	0.129371	0.207456	6.36e-05	0.259681	3.635e-08
X13692_154	WNT1-inducible-signaling pathway protein 1	WISP-1	CCN4	0	0	0.518571	0.525781	0.528819	-0.031807	0.353778	0.539563	-0.0155479	0.651567	0.063856	0.222957	0.0966393	0.0434725
X14332_3	Ras-related protein Ral-A	RALA	RALA	0	0	0.502511	0.556831	0.528801	0.00901902	0.792647	0.0205743	-0.140585	4.07e-05	0.170739	0.00104039	0.251339	1.01074e-07
X8297_8	DnaJ homolog subfamily C member 10	DJC10	DNAJC10	0	0	0.512379	0.519501	0.528801	-0.0234612	0.494039	0.752954	-0.120992	0.000420373	0.125772	0.016062	0.215491	5.48432e-06
X16749_79	Growth/differentiation factor 10	BMP-3b	GDF10	0	0	0.522815	0.535941	0.528786	0.0438794	0.200709	0.405348	-0.0535394	0.119692	-0.0242427	0.643886	0.0236062	0.622626
X12818_159	Urea transporter 2	UT2	SLC14A2	0	0	0.539369	0.541314	0.528782	0.0689916	0.0440894	0.265308	0.0498647	0.147302	-0.0508709	0.331789	-0.154831	0.00116624
X24945_16	Sorting nexin-27	SNX27	SNX27	0	0	0.525766	0.52312	0.528782	-0.0529123	0.122765	0.34325	0.000485054	0.98876	0.0568557	0.277979	0.0323598	0.499863
X10073_22	Tyrosyl-DNA phosphodiesterase 1	TYDP1	TDP1	0	0	0.546662	0.544132	0.528767	0.0792906	0.0206314	0.345519	0.136654	6.68e-05	-0.182492	0.000450057	-0.295921	2.78595e-10
X2516_57	C-C motif chemokine 21	6Ckine	CCL21	0	0	0.531951	0.541202	0.528767	-0.0518028	0.130822	0.337276	0.0280509	0.415161	0.056977	0.276953	0.111897	0.0192938
X12563_2	Tumor necrosis factor alpha-induced protein 8	TFIP8	TNFAIP8	0	0	0.510097	0.500577	0.528734	-0.0242222	0.480134	0.563661	-0.0414708	0.228219	0.234978	5.53e-06	0.199314	2.70686e-05
X11308_8	Cyclic AMP-responsive element-binding protein 3-like protein 4	CR3L4	CREB3L4	0	0	0.540737	0.513283	0.528715	-0.0790715	0.0209853	0.125339	-0.070354	0.0407728	0.132681	0.0110567	0.104627	0.028748
X9017_58	Lactase-phlorizin hydrolase	LPH	LCT	0	0	0.512758	0.522576	0.528693	0.0190012	0.579673	0.852526	-0.113003	0.000992971	0.230959	8.05e-06	0.143141	0.00270694
X23657_102	Heterogeneous nuclear ribonucleoprotein L-like	HNRLL	HNRNPLL	0	0	0.533869	0.539162	0.528682	0.0607268	0.0764626	0.461407	0.0498693	0.147265	-0.155315	0.00288913	-0.153982	0.00124228
X18842_24	Ubiquitin-conjugating enzyme E2 D2	UB2D2	UBE2D2	0	0	0.563922	0.606685	0.528678	0.109135	0.00142077	0.00782717	-0.302092	2.6e-19	0.0134968	0.796918	0.176978	0.00020046
X2693_20	Oncostatin-M	OSM	OSM	0	0	0.527232	0.541742	0.528667	-0.0375075	0.274137	0.479459	0.0644374	0.0610122	0.0419797	0.42329	0.0209525	0.662259
X21767_129	Polypeptide N-acetylgalactosaminyltransferase 14	GLT14	GALNT14	0	0	0.518516	0.539735	0.528652	0.0256448	0.45472	0.395509	-0.106085	0.00200318	0.00628257	0.904655	0.0424773	0.375712
X2826_53	Ectodysplasin-A, secreted form	EDA	EDA	0	0	0.536502	0.533153	0.528641	0.0680945	0.0469222	0.0948726	-0.116076	0.000717943	-0.0670807	0.200411	-0.0486972	0.309782
X3077_66	Coagulation factor Xa	Coagulation Factor Xa	F10	0	0	0.503674	0.530588	0.528618	-0.0129209	0.706463	0.809461	0.0039909	0.907725	0.155306	0.00289087	0.180614	0.000146988
X11381_56	Ribose-phosphate pyrophosphokinase 1	PRPS1	PRPS1	0	0	0.50344	0.529981	0.528615	-0.0068999	0.840614	0.133946	0.0483091	0.160359	0.0407093	0.43747	-0.0563822	0.239513
X7993_23	Astacin-like metalloendopeptidase	ASTL	ASTL	0	0	0.506596	0.519114	0.528615	0.0185743	0.588221	0.692896	-0.0257831	0.453891	-0.0214286	0.682834	-0.0907377	0.0580516
X12549_33	Hematopoietic prostaglandin D synthase	PTGD2	HPGDS	0	0	0.500396	0.520986	0.528592	-0.00215894	0.949826	0.946487	0.101481	0.00312732	0.0913899	0.0807994	-0.0252775	0.598203
X2877_3	SUMO-conjugating enzyme UBC9	UBC9	UBE2I	0	-0.00527846	0.507076	0.524478	0.528518	0.00504815	0.883025	0.71366	-0.248293	2.37e-13	0.200114	0.000116031	0.335086	6.30237e-13
X4212_5	Epidermal growth factor receptor substrate 15-like 1	EP15R	EPS15L1	0	0	0.51406	0.54045	0.528507	0.0168115	0.624116	0.391842	-0.122144	0.000369759	0.0891893	0.0884088	0.0600418	0.210322
X21679_16	Cadherin-20	CAD20	CDH20	0	0	0.535784	0.546373	0.528488	-0.0656442	0.0554486	0.389076	0.0298752	0.38547	0.0493899	0.346076	0.0804749	0.0929187
X4976_57	Adapter molecule crk	CRK	CRK	0	-0.0643914	0.518414	0.591406	0.528477	0.0289739	0.398304	0.723007	-0.294506	2.17e-18	0.243309	2.48e-06	0.373371	6.65284e-16
X12482_5	Nucleosome-remodeling factor subunit BPTF	BPTF	BPTF	0	0	0.603219	0.584831	0.528455	-0.170298	5.73028e-07	5.0452e-06	-0.0549458	0.110266	0.121275	0.0202997	0.147918	0.00193272
X9986_14	Neuropeptide W	Neuropeptide W	NPW	0	0	0.534833	0.530681	0.528447	-0.0615588	0.0725092	0.396642	0.024967	0.46831	0.0786288	0.133242	0.217347	4.52975e-06
X2869_68	Protein kinase C delta type	PKC-D	PRKCD	0	0	0.522036	0.52924	0.528447	0.0388124	0.257777	0.778985	0.024997	0.467776	-0.0496469	0.343569	-0.233093	8.35986e-07
X25296_3	Angiomotin	AMOT	AMOT	0	0	0.538041	0.546105	0.528432	0.069099	0.0437601	0.179087	0.0167736	0.626123	-0.113352	0.0301493	-0.137212	0.00405629
X8059_1	Thrombopoietin	Tpo	THPO	0	0	0.53351	0.532568	0.528388	0.0732109	0.0326235	0.0280526	0.0458181	0.183058	-0.19461	0.00017949	-0.276452	4.16542e-09
X14756_29	Intercellular adhesion molecule 2	sICAM-2	ICAM2	0	0	0.504878	0.549106	0.528365	-0.00999751	0.770748	0.690001	0.0745418	0.0301633	0.185878	0.000350089	0.143021	0.00272972
X21721_6	Carbohydrate sulfotransferase 10	CHSTA	CHST10	0	0	0.552058	0.525063	0.528365	-0.0875751	0.010546	0.0533727	-0.136572	6.74e-05	0.0358568	0.494067	0.106928	0.0253978
X3067_67	Growth/differentiation factor 9	GDF-9	GDF9	0	0	0.535171	0.505625	0.528358	0.0681656	0.0466924	0.37427	0.105903	0.00203939	-0.16817	0.00124088	-0.269354	1.06112e-08
X19189_2	Ubiquitin carboxyl-terminal hydrolase 14	UBP14	USP14	0	0	0.517202	0.524698	0.528332	0.0232727	0.497518	0.626752	-0.106667	0.00189114	0.109252	0.0366876	0.106396	0.0261411
X3479_71	Trypsin-3	TRY3	PRSS3	0	0	0.542762	0.538108	0.528317	-0.0761475	0.0262402	0.231428	0.00946014	0.783502	-0.0182514	0.727837	0.0802656	0.0937746
X15589_1	Vitamin D-binding protein	Gc-Globulin, Mixed Type	GC	0	0	0.511616	0.545852	0.52828	-0.0262516	0.444113	0.362934	0.0635392	0.0647122	0.149919	0.00404575	0.107812	0.0242032
X16802_31	OCIA domain-containing protein 1	OCAD1	OCIAD1	0	0	0.547559	0.546887	0.528253	0.0868823	0.0111779	0.0298413	-0.0920751	0.0073658	0.0887898	0.08985	0.15625	0.00104865
X5094_62	Junctional adhesion molecule-like	JAML1	JAML	0	0	0.50175	0.51392	0.528239	0.011138	0.745453	0.219024	0.0201794	0.557786	-0.078541	0.133678	-0.024692	0.60671
X23312_16	Rab-like protein 3	RABL3	RABL3	0	0	0.539421	0.538443	0.528172	-0.0699345	0.0412683	0.401383	0.0849438	0.0134549	-0.0337202	0.520171	0.00782292	0.870464
X17854_33	N-alpha-acetyltransferase 10	NAA10	NAA10	0	0	0.515229	0.529813	0.528138	0.0277718	0.418172	0.790687	0.127401	0.000202991	-0.126818	0.015196	-0.214512	6.06237e-06
X12370_30	Apolipoprotein F	Apo F	APOF	0	0	0.500333	0.53252	0.528131	0.00730508	0.831391	0.688176	-0.0150696	0.66161	0.129476	0.0131755	-0.0190554	0.69119
X21757_49	Ubiquitin carboxyl-terminal hydrolase 22	UBP22	USP22	0	0	0.5046	0.51628	0.528112	-0.0229954	0.502655	0.231384	0.033735	0.327063	0.0166077	0.751503	-0.0621394	0.194794
X19567_1	Epidermal growth factor receptor variant III	EGFRvIII	EGFR	0	0	0.526602	0.519866	0.52809	-0.0471527	0.169105	0.281325	-0.0566492	0.0996428	0.123184	0.018395	0.125484	0.00863803
X9899_28	Kinesin-like protein KIF1C	KIF1C	KIF1C	0	0	0.560578	0.540562	0.528064	-0.100473	0.00332653	0.00281733	0.106391	0.00194358	0.0176265	0.736804	-0.0701101	0.143406
X11122_97	Maspardin	SPG21	SPG21	0	0	0.536322	0.534832	0.52803	-0.0701359	0.0406861	0.276727	-0.0895464	0.00916227	0.110669	0.0343035	0.263536	2.23855e-08
X23024_25	GTP-binding protein SAR1a	SAR1A	SAR1A	0	0	0.555339	0.544095	0.528004	-0.104045	0.00235967	3.16319e-05	-0.0151632	0.65964	0.00594041	0.909825	0.120959	0.0113852
X18236_3	Galectin-related protein	LEGL	LGALSL	0	0	0.516071	0.547635	0.527978	0.0254645	0.457898	0.586972	-0.229041	1.56e-11	0.0931388	0.0751372	0.23841	4.59587e-07
X18877_15	Calponin-2	CNN2	CNN2	0	0	0.54913	0.540729	0.527915	0.0756831	0.0271718	0.278353	-0.16894	7.73e-07	0.116032	0.0264366	0.260123	3.43952e-08
X4271_75	Prefoldin subunit 5	PFD5	PFDN5	0	0	0.50096	0.504981	0.527889	9.12233e-05	0.997879	0.218113	-0.075151	0.0288369	0.0300795	0.566228	0.139378	0.00350539
X19612_3	CD81 antigen	CD81	CD81	0	0	0.520819	0.533845	0.52784	-0.0313739	0.360373	0.522396	-0.00256418	0.940635	-0.0363196	0.488506	0.0120316	0.801965
X11545_9	Tumor necrosis factor receptor superfamily member 14	HVEM	TNFRSF14	0	0	0.547594	0.52134	0.527829	-0.0752311	0.0281053	0.0198156	-0.0531943	0.122099	0.0907385	0.0829944	0.230931	1.06195e-06
X12499_108	Endophilin-A1	SH3G2	SH3GL2	0	0	0.531251	0.570699	0.527818	0.05242	0.126291	0.304156	-0.334712	1.36e-23	0.16953	0.00113072	0.206211	1.39152e-05
X21219_7	RPA-interacting protein	RPAIN	RPAIN	0	0	0.561116	0.550662	0.527803	0.121603	0.000374424	0.000159169	-0.0336927	0.32767	-0.0684784	0.191171	-0.14969	0.00170137
X11185_145	GTP cyclohydrolase 1	GCH1	GCH1	0	0	0.525728	0.521753	0.52777	-0.0370422	0.280137	0.655022	0.0761143	0.0268422	-0.0499097	0.341018	0.0139076	0.771882
X3143_3	T-cell surface glycoprotein CD4	sCD4	CD4	0	0	0.550117	0.531999	0.527762	0.0943272	0.00586162	0.0660382	0.0256887	0.455546	-0.218941	2.38e-05	-0.276646	4.0589e-09
X8654_13	Disintegrin and metalloproteinase domain-containing protein 10:Cytoplasmic domain	ADAM 10:CD	ADAM10	0	0	0.518235	0.517412	0.527762	0.040667	0.235709	0.0784656	0.0321304	0.350611	-0.0579438	0.268871	-0.130341	0.00636101
X8907_11	UDP-glucuronosyltransferase 2A1	UD2A1	UGT2A1	0	0	0.554795	0.558033	0.527743	-0.0843499	0.0137831	0.0617645	0.0783877	0.0226	0.0148543	0.777005	0.0455237	0.342408
X6352_8	Insulin receptor-related protein	INSRR	INSRR	0	0	0.512894	0.519423	0.527688	-0.0285486	0.405266	0.77411	-0.0759674	0.0271385	0.091816	0.0793891	0.159388	0.0008264
X6493_9	Carboxypeptidase Z	CBPZ	CPZ	0	0	0.527823	0.510856	0.52768	0.0487356	0.155229	0.314334	0.0439122	0.201969	-0.061332	0.241824	-0.0840012	0.0794171
X4878_3	Coagulation Factor X	Coagulation Factor X	F10	0	0	0.508856	0.531541	0.527673	-0.0222127	0.517311	0.525949	0.00506727	0.882998	0.164876	0.00155	0.20178	2.13925e-05
X20120_101	Amphoterin-induced protein 1:Extracellular domain	AMGO1:ECD	AMIGO1	0	0	0.503608	0.533164	0.527654	0.0074733	0.827568	0.929367	0.00448882	0.896274	-0.201507	0.000103707	-0.234012	7.54616e-07
X2969_11	Serine/threonine-protein kinase receptor R3	ALK-1	ACVRL1	0	0	0.517847	0.516902	0.527639	0.0319317	0.351893	0.972187	0.120099	0.000464015	-0.176296	0.00070461	-0.201957	2.10323e-05
X18386_36	Glutaredoxin-1	GLRX1	GLRX	0	0	0.503799	0.560766	0.527635	0.0033871	0.92136	0.980743	-0.130544	0.000140256	0.0583188	0.265779	0.0424664	0.375834
X5065_8	CD83 antigen	CD83	CD83	0	0.00294911	0.510059	0.531533	0.527595	0.0148152	0.665866	0.58924	-0.198271	6.02e-09	0.125776	0.0160589	0.201783	2.13864e-05
X10058_1	UV excision repair protein RAD23 homolog A	RD23A	RAD23A	0	-0.0643914	0.503055	0.569258	0.527565	0.0040204	0.906718	0.768891	-0.284163	3.54e-17	0.172288	0.000934379	0.339541	2.97608e-13
X6039_24	Corticotropin-releasing factor-binding protein	CRHBP	CRHBP	0	0	0.518067	0.543093	0.527565	-0.0320581	0.349988	0.452649	0.115265	0.000782651	-0.00288731	0.9561	-0.118235	0.0133888
X15607_56	Pyruvate kinase PKLR	KPYR	PKLR	0	0	0.501577	0.538332	0.527554	0.00722887	0.833124	0.244979	0.0726436	0.0346363	-0.079038	0.131228	-0.146225	0.00218034
X2871_73	DNA repair protein RAD51 homolog 1	RAD51	RAD51	0	0	0.521163	0.527777	0.527535	-0.0269306	0.432414	0.134783	0.000143661	0.996671	0.113381	0.0301062	-0.00596373	0.901067
X12691_44	Serine hydroxymethyltransferase, mitochondrial	GLYM	SHMT2	0	0	0.508196	0.566421	0.527516	-0.0111629	0.744903	0.571439	0.0695378	0.0431722	-0.124452	0.0172179	-0.13717	0.00406778
X11602_12	Copine-1:Von Willebrand factor type A domain	CPNE1:VWFA	CPNE1	0	0	0.530175	0.551768	0.527509	-0.0522734	0.127356	0.0192197	0.0373295	0.278125	0.0762048	0.145665	0.0478027	0.318764
X10025_1	Dihydrolipoyl dehydrogenase, mitochondrial	DLDH	DLD	0	0	0.511066	0.57702	0.527382	0.0138738	0.685927	0.529767	-0.108395	0.00159162	-0.0406588	0.438039	-0.021461	0.654588
X13628_58	Growth factor receptor-bound protein 14	GRB14	GRB14	0	0	0.512371	0.549683	0.527371	-0.0226544	0.509014	0.968503	-0.0602323	0.0799596	0.262847	3.37e-07	0.309896	3.50981e-11
X10010_10	Beclin-1	BECN1	BECN1	0	0	0.512996	0.538488	0.527367	0.0169892	0.620454	0.89657	-0.0060224	0.86115	-0.0140728	0.788453	-0.0733121	0.125961
X17849_6	Developmentally-regulated GTP-binding protein 1	DRG1	DRG1	0	0	0.504782	0.519683	0.527345	0.00813856	0.812492	0.96911	-0.00224892	0.947923	-0.0929914	0.0756018	-0.00659765	0.890614
X13486_9	Polycystin-2:Cytoplasmic domain 1	PKD2:CD 1	PKD2	0	0	0.53989	0.530245	0.527338	-0.0765309	0.0254922	0.0129202	-0.129551	0.000157774	0.152695	0.00340688	0.259087	3.91412e-08
X22772_125	Sorting and assembly machinery component 50 homolog	SAM50	SAMM50	0	0	0.54464	0.528596	0.527312	-0.0690955	0.0437706	0.127737	-0.120271	0.000455273	0.190773	0.000241622	0.264439	1.99597e-08
X13730_18	Dipeptidyl peptidase 1	CATC	CTSC	0	0	0.524617	0.532371	0.527286	-0.0457718	0.18195	0.424856	-0.0394423	0.251807	0.116547	0.0257704	0.175849	0.000220459
X7812_11	Protein S100-A9	calgranulin B	S100A9	0	0	0.520295	0.528816	0.527267	0.0421295	0.219275	0.268437	0.137385	6.09e-05	-0.183946	0.000404272	-0.208285	1.13415e-05
X10367_62	Interleukin-12	IL-12	IL12A|IL12B	0	0	0.503619	0.5244	0.527267	-0.00165167	0.961605	0.918839	0.0319428	0.353431	0.0157548	0.763876	-0.0383715	0.423631
X8385_248	Hepatocyte growth factor activator	HGFA	HGFAC	0	0	0.517098	0.505473	0.527263	0.0249695	0.466688	0.625469	0.0555496	0.106402	0.0915229	0.0803569	0.0571111	0.233483
X8407_84	Neurogenic locus notch homolog protein 2	NOTC2	NOTCH2	0.00962253	0	0.515597	0.511377	0.527219	-0.0386561	0.259701	0.442526	-0.0722342	0.035672	0.153153	0.00331062	0.172481	0.000291783
X17832_12	Isopentenyl-diphosphate delta-isomerase 2	IDI2	IDI2	0	0	0.504933	0.526128	0.527151	0.011709	0.73289	0.517146	0.156725	4.65e-06	-0.025815	0.622533	-0.0923976	0.053591
X6456_17	Pregnancy-specific beta-1-glycoprotein 6	PSG6	PSG6	0	0	0.531511	0.521347	0.527151	0.0520099	0.129288	0.422209	0.0106808	0.7564	-0.141114	0.00685156	-0.0801858	0.0941025
X13541_1	Myc target protein 1	MYCT1	MYCT1	0	0	0.501947	0.530294	0.527144	-0.000124269	0.99711	0.292293	0.0299214	0.384736	0.0150509	0.774134	-0.0691304	0.149097
X3815_14	Interleukin-12 receptor subunit beta-2	IL-12 RB2	IL12RB2	0	0	0.532955	0.522475	0.527133	-0.0535268	0.118472	0.499779	-0.0576545	0.093766	0.10032	0.0551744	0.205581	1.48017e-05
X17694_32	Proteasome activator complex subunit 2	PSME2	PSME2	0	0	0.553675	0.529121	0.527125	-0.099697	0.0035792	0.146872	-0.0375661	0.275088	0.233129	6.57e-06	0.229987	1.17808e-06
X5268_49	Matrix metalloproteinase-16	MMP-16	MMP16	0	0	0.538249	0.512561	0.527125	-0.0571701	0.0953842	0.0109395	0.0279899	0.416176	0.0540105	0.302776	0.0270426	0.572893
X3534_14	CD40 ligand	CD40 ligand, soluble	CD40LG	0	0	0.503692	0.532699	0.527111	0.00343492	0.920253	0.73157	0.064757	0.0597385	-0.0515223	0.325627	-0.155304	0.00112579
X23148_100	Endothelial cell-derived lipase	Endothelial lipase	LIPG	0	0	0.504614	0.504114	0.52707	-0.0150339	0.661238	0.712713	-0.0885563	0.00996584	0.140233	0.00721126	0.20916	1.03977e-05
X7916_10	Protein S100-A7	S100A7	S100A7	0	0	0.539519	0.517621	0.527058	0.0663384	0.0529115	0.502415	0.121453	0.000399393	-0.13814	0.00813455	-0.291357	5.3512e-10
X21832_31	Squamous cell carcinoma antigen 1	SCCA1	SERPINB3	0	0	0.514905	0.53402	0.52704	-0.0200452	0.559019	0.400931	0.0839793	0.0145522	-0.026667	0.611093	-0.0276542	0.564242
X21752_10	Mitochondrial Rho GTPase 1	MIRO1	RHOT1	0	0	0.536889	0.554444	0.527032	0.0691865	0.0434932	0.459727	-0.0691871	0.0442391	-0.113517	0.0299083	-0.171679	0.000311669
X9226_6	Transmembrane and ubiquitin-like domain-containing protein 2	TMUB2	TMUB2	0	0	0.528427	0.536641	0.527017	0.0498725	0.145808	0.267946	-0.00265394	0.938561	0.010436	0.842282	0.0970953	0.0424873
X13098_93	Vascular endothelial growth factor D	VEGF-D	VEGFD	0	0.00623434	0.526411	0.535919	0.52701	0.0488868	0.15395	0.523455	-0.0743367	0.0306215	0.00959381	0.854863	0.177102	0.000198373
X20922_4	Profilin-4	PROF4	PFN4	0	0	0.521739	0.560703	0.526977	-0.0361272	0.292198	0.782053	0.083214	0.0154783	-0.0268296	0.608919	-0.0123065	0.797538
X20067_26	Factor seven-activating protease	FSAP	HABP2	0	0	0.519748	0.551191	0.526943	-0.0364117	0.288411	0.65246	0.0305502	0.374821	0.22031	2.11e-05	0.190782	5.97694e-05
X9945_8	Armadillo repeat-containing protein 5:Armadillo Repeat Domain 2	ARMC5:ARM 2	ARMC5	0	0	0.504765	0.519881	0.526943	-0.0028793	0.93312	0.703494	-0.0220624	0.521628	-0.0470116	0.369824	-0.0385303	0.421714
X8458_16	Alpha-synuclein	a-Synuclein	SNCA	0	0	0.529961	0.554091	0.526932	0.0459279	0.180463	0.607369	-0.117435	0.00062043	0.0666959	0.203011	0.000534338	0.991113
X3646_7	Tyrosine-protein kinase Tec	TEC	TEC	0	0	0.538061	0.53717	0.526917	0.0759451	0.0266427	0.000538126	0.0410453	0.233033	-0.148861	0.00431661	-0.177488	0.000191991
X20445_29	AP-1 complex-associated regulatory protein	AP1AR	AP1AR	0	-0.0388657	0.501143	0.571853	0.526913	-0.0002124	0.995061	0.513829	-0.209939	7e-10	0.0807135	0.123226	0.228117	1.44491e-06
X2878_66	Tyrosine-protein kinase Yes	YES	YES1	0	0	0.539401	0.531291	0.526902	-0.0713064	0.0374377	0.175903	0.0583754	0.0897255	0.0868265	0.0972084	0.0992353	0.038112
X19227_18	Basic leucine zipper transcriptional factor ATF-like	BATF	BATF	0	0	0.524099	0.519951	0.526898	-0.049317	0.150355	0.208859	-0.0311759	0.365113	0.0275386	0.599485	0.129288	0.00680298
X23037_37	Ubiquitin-conjugating enzyme E2 D3	UB2D3	UBE2D3	0	0	0.555611	0.559608	0.526895	0.0989064	0.00385445	0.0101875	-0.230728	1.1e-11	-0.014166	0.787084	0.0770339	0.107805
X9930_48	Gamma-aminobutyric acid type B receptor subunit 2:Cytoplasmic domain	GABR2:CD	GABBR2	0	0	0.537364	0.517237	0.526883	-0.0674729	0.0489736	0.0786212	0.0551204	0.109137	-0.0223193	0.67041	0.0884505	0.0646974
X2501_51	Cadherin-1	Cadherin E	CDH1	0	0	0.501935	0.540707	0.526876	0.00110155	0.974388	0.633623	0.0874097	0.0109743	0.0431723	0.410228	0.0106303	0.824632
X4479_14	Plasma protease C1 inhibitor	C1-Esterase Inhibitor	SERPING1	0	0	0.516352	0.529631	0.526876	-0.0320899	0.34951	0.553227	-0.0905995	0.00837139	0.35638	2.12e-12	0.414087	1.5593e-19
X6225_3	Prostasin	Prostasin	PRSS8	0	0	0.513389	0.512249	0.526869	-0.031096	0.364645	0.083563	-0.10002	0.00358895	0.313031	9.2e-10	0.303935	8.6072e-11
X12682_5	Kynurenine--oxoglutarate transaminase 3	KAT3	KYAT3	0	0	0.510742	0.537222	0.526865	0.0151277	0.659256	0.326559	-0.120833	0.000427879	-0.0430944	0.411073	0.0918115	0.0551322
X12556_7	Ubiquitin-conjugating enzyme E2 C	UBE2C	UBE2C	0	0	0.524108	0.503704	0.526865	0.0485154	0.157106	0.272356	0.0747122	0.0297872	-0.0977338	0.061785	-0.0630531	0.188298
X8106_15	Translocon-associated protein subunit alpha	SSRA	SSR1	0	0	0.536357	0.530763	0.52685	-0.0667455	0.051469	0.173662	0.0323551	0.34725	0.0460042	0.380179	0.0731385	0.126862
X6913_189	High mobility group protein B2	HMG-2	HMGB2	0	0	0.535617	0.52532	0.52685	0.0615364	0.0726135	0.308591	0.13877	5.12e-05	-0.130654	0.0123585	-0.297282	2.28782e-10
X22385_2	PWWP domain-containing protein MUM1	MUM1	PWWP3A	0	0	0.612757	0.552777	0.526798	-0.195636	8.52381e-09	1.14649e-07	-0.0441948	0.199079	0.188189	0.000294194	0.26648	1.53778e-08
X23246_67	Biogenesis of lysosome-related organelles complex 1 subunit 1	BL1S1	BLOC1S1	0	0	0.505352	0.536839	0.526798	0.00585009	0.86461	0.946017	-0.0437351	0.203796	0.0823659	0.115711	0.0559028	0.243538
X6936_7	Protein TMEPAI	PMEPA	PMEPA1	0	0	0.512513	0.535148	0.526798	0.0310526	0.365315	0.343309	0.0312775	0.363552	-0.126178	0.0157213	-0.0667475	0.163655
X6357_83	Chymotrypsin-like elastase family member 3B	ELA3B	CELA3B	0	0	0.508193	0.503507	0.526798	-0.0127731	0.709668	0.900424	-0.0653965	0.0572561	0.0443297	0.39778	0.212164	7.69442e-06
X15426_5	Sialidase-1	NEUR1	NEU1	0	0	0.512327	0.512137	0.526775	-0.0232716	0.497536	0.476245	0.198466	5.81e-09	-0.347648	7.77e-12	-0.427958	6.88493e-21
X15587_20	Folate receptor beta	FOLR2	FOLR2	0	0.00294911	0.508543	0.524266	0.526727	-0.0209021	0.542338	0.32442	-0.203822	2.2e-09	0.27137	1.34e-07	0.342506	1.79409e-13
X23007_8	Junction plakoglobin	PLAK	JUP	0	0	0.567591	0.562386	0.526705	-0.102969	0.0026198	0.0130382	0.0626663	0.0684836	-0.0265584	0.612546	-0.0164421	0.731784
X23392_41	Pleckstrin homology domain-containing family A member 3	PKHA3	PLEKHA3	0	0	0.547901	0.537445	0.526682	-0.0936503	0.00622735	0.00191491	0.0730764	0.0335694	0.124777	0.0169265	0.190256	6.26953e-05
X19115_13	Carboxymethylenebutenolidase homolog	CMBL	CMBL	0	0	0.525332	0.52994	0.526682	0.0280406	0.413678	0.0244516	-0.0436143	0.205049	0.0984112	0.0599929	-0.0214265	0.655106
X17757_86	Calcium-binding protein 39	CAB39	CAB39	0	-0.0388657	0.514144	0.589224	0.52666	0.019711	0.565592	0.863561	-0.322287	6.71e-22	0.238277	4.04e-06	0.403641	1.4882e-18
X12634_79	Breast cancer anti-estrogen resistance protein 3:Guanine Nucleotide Exchange Factor Domain	BCAR3:Ras-GEF	BCAR3	0	0	0.525607	0.534571	0.526634	-0.0512007	0.135362	0.0767438	-0.0548954	0.110593	0.11232	0.0316927	0.182568	0.0001241
X8954_30	Mitogen-activated protein kinase kinase kinase kinase 1	M4K1	MAP4K1	0	0	0.510039	0.532155	0.526634	0.0129559	0.705704	0.720037	-0.147904	1.56e-05	0.144463	0.00562575	0.310686	3.11132e-11
X25093_96	Vang-like protein 1	VANG1	VANGL1	0	0	0.505054	0.536291	0.526623	0.0129379	0.706094	0.868914	0.0673533	0.0501866	-0.0684503	0.191354	-0.149395	0.0017381
X9823_2	Dihydrofolate reductase	DYR	DHFR	0	0	0.532527	0.527639	0.526623	-0.0547273	0.110424	0.419236	-0.0781424	0.0230279	0.0871794	0.0958516	0.167531	0.000436427
X3805_16	Endothelial cell-specific molecule 1	Endocan	ESM1	0	0	0.531176	0.526623	0.526615	-0.0555263	0.105312	0.457947	-0.0399716	0.245494	0.128494	0.0138923	0.344376	1.30017e-13
X15364_101	Apolipoprotein C-I	Apo C-I	APOC1	0	0	0.540708	0.560312	0.5266	-0.0762716	0.0259961	0.117186	0.00679692	0.84351	0.059928	0.252791	-0.0535427	0.264045
X22063_20	Calpain small subunit 2	CPNS2	CAPNS2	0	0	0.544154	0.551905	0.526571	-0.0681666	0.0466889	0.155429	-0.0559188	0.104093	0.0841939	0.10782	0.179954	0.000155574
X9994_217	Potassium-transporting ATPase subunit beta	ATP4B	ATP4B	0	0	0.516953	0.531541	0.526548	-0.03414	0.31957	0.0666328	0.0279612	0.416655	-0.000741053	0.988727	-0.0733912	0.125552
X14291_53	Arf-GAP with GTPase, ANK repeat and PH domain-containing protein 2	AGAP2	AGAP2	0	0	0.518724	0.560096	0.52653	0.0253768	0.459449	0.685153	-0.190299	2.43e-08	-0.0106558	0.839005	0.161402	0.000707615
X24412_1	Synaptonemal complex central element protein 1-like	SYC1L	SYCE1L	0	0	0.562056	0.555204	0.526526	-0.108289	0.00154799	2.95765e-18	-0.0141822	0.680401	0.181198	0.000494831	0.246826	1.73147e-07
X24646_47	Serine--pyruvate aminotransferase	SPYA	AGXT	0	0	0.525144	0.539065	0.526493	0.0380962	0.26667	0.663375	0.0478911	0.164012	-0.0472403	0.367497	-0.154377	0.0012064
X21524_14	Ubiquitin carboxyl-terminal hydrolase 5	UBP5	USP5	0	0	0.531641	0.52972	0.526474	-0.0523006	0.127157	0.23225	-0.0505027	0.142189	0.0993646	0.057544	0.288059	8.51555e-10
X5698_60	Tenascin-X	Tenascin-X	TNXB	0	0	0.518495	0.529486	0.526459	-0.0418328	0.222541	0.0905168	0.00459535	0.893827	0.0521376	0.319874	0.094209	0.0490524
X23589_21	Protein phosphatase 1 regulatory subunit 27	PPR27	PPP1R27	0	0	0.507418	0.520733	0.52644	0.0169827	0.620589	0.50827	0.0374712	0.276303	0.0440543	0.400721	0.023162	0.629189
X3498_53	Interleukin-17A	IL-17	IL17A	0	0	0.516158	0.555204	0.526422	0.0269228	0.432547	0.849639	-0.000568295	0.986831	-0.0851228	0.103976	-0.0909809	0.0573793
X19110_6	Protein MEMO1	MEMO1	MEMO1	0	0	0.526145	0.564478	0.526399	0.0438688	0.200819	0.256079	-0.200961	3.71e-09	-0.00431345	0.934457	0.161966	0.000677354
X6545_58	Major prion protein	PRIO	PRNP	0	0	0.513016	0.547989	0.526366	0.0277364	0.418764	0.642035	-0.00875114	0.799368	-0.0632813	0.227158	-0.119448	0.0124616
X21614_2	Gem-associated protein 6	GEMI6	GEMIN6	0	0	0.512333	0.532881	0.526288	0.0196056	0.567671	0.527205	0.0365884	0.287783	-0.0589976	0.260246	-0.122266	0.0105217
X5255_22	cAMP-specific 3',5'-cyclic phosphodiesterase 4D	PDE4D	PDE4D	0	0	0.544565	0.538402	0.526265	-0.0725416	0.0342514	0.0144429	0.0433772	0.207525	0.0178624	0.733415	0.01201	0.802314
X16926_44	Alkaline phosphatase, tissue-nonspecific isozyme	Alkaline phosphatase, liver	ALPL	0	0	0.506321	0.523313	0.526265	0.00678788	0.843168	0.958319	-0.15147	9.66e-06	0.23029	8.56e-06	0.316199	1.32919e-11
X22371_46	Protein FAM110A	F110A	FAM110A	0	0	0.512258	0.545513	0.526262	-0.0197976	0.563886	0.701684	-0.0722287	0.0356859	0.196877	0.00015019	0.158123	0.000910189
X21112_6	Myosin regulatory light chain 2, skeletal muscle isoform	MLRS	MYLPF	0	0	0.525337	0.532777	0.526247	-0.0372145	0.277906	0.408646	0.0673911	0.0500574	0.138602	0.00792206	0.201502	2.19713e-05
X22484_17	Casein kinase I isoform alpha-like	KC1AL	CSNK1A1L	0	0	0.602721	0.526321	0.526232	-0.169554	6.42667e-07	1.44646e-06	-0.0708355	0.039411	0.0849898	0.10452	0.230735	1.08507e-06
X13231_90	Ig gamma-4, Kappa	IgG4, Kappa	IGHG4	0	0	0.500237	0.55029	0.526221	0.00198613	0.953838	0.493754	-0.0964738	0.00497809	0.228793	9.83e-06	0.232402	9.02691e-07
X25086_83	GRAM domain-containing protein 2B	GRM2B	GRAMD2B	0	0	0.507253	0.517282	0.526221	-0.0197576	0.564673	0.446372	0.0567128	0.0992623	0.00415674	0.936833	0.0653005	0.173002
X25104_10	Transcription factor CP2-like protein 1	TF2L1	TFCP2L1	0.00860347	0	0.508537	0.528071	0.526213	0.0139398	0.684514	0.868096	0.132449	0.000111661	-0.158705	0.00232576	-0.265985	1.63846e-08
X12652_37	Adenosylhomocysteinase 2	SAHH2	AHCYL1	0	0	0.51829	0.528931	0.526195	-0.0281451	0.41194	0.256376	0.182768	8.64e-08	-0.125957	0.0159057	-0.131645	0.00584945
X9954_2	Nuclear pore complex-interacting protein family member B3	NPPL3	NPIPB3	0	0	0.541608	0.543056	0.526187	-0.0586894	0.0868878	0.0659597	-0.0408791	0.234932	0.0460162	0.380055	0.037235	0.437501
X9300_13	Nectin-1, isoform gamma:Extracellular domain	nectin-1 gamma:ECD	NECTIN1	0	0	0.515108	0.521519	0.526172	-0.0266729	0.436833	0.399134	0.0406502	0.237565	0.00412348	0.937337	0.0886634	0.0640535
X11360_39	Ribonucleoside-diphosphate reductase large subunit	RRM1	RRM1	0	0	0.527669	0.53819	0.526131	-0.0540795	0.114711	0.558305	0.0473802	0.168562	0.12119	0.0203885	0.0117501	0.806507
X7123_25	39S ribosomal protein L52, mitochondrial	RM52	MRPL52	0	0	0.501342	0.526109	0.526113	0.00791311	0.817594	0.220416	-0.00785411	0.81956	0.00741786	0.887531	0.0170027	0.723009
X18407_36	ADP-ribosylation factor-like protein 2-binding protein	AR2BP	ARL2BP	0	0	0.52326	0.530256	0.526098	-0.0384832	0.26184	0.649113	-0.0494533	0.150674	0.108788	0.0374985	0.192095	5.30303e-05
X21746_13	Ubiquitin carboxyl-terminal hydrolase 10	UBP10	USP10	0	0	0.530429	0.510964	0.526098	0.0590057	0.0851979	0.0543844	-0.030312	0.378558	0.0834995	0.110766	-0.0576041	0.229465
X9219_70	Neudesin	NENF	NENF	0	0	0.532125	0.533212	0.526087	-0.0545838	0.111363	0.365412	-0.0937178	0.00637468	0.104829	0.0450527	0.179939	0.00015578
X12554_10	DNA repair protein RAD51 homolog 4	RA51D	RAD51D	0	0	0.511428	0.517055	0.526072	0.0219449	0.522376	0.78576	-0.00335087	0.922472	-0.0937678	0.0731816	-0.0579666	0.226543
X7953_20	Signaling lymphocytic activation molecule	SLAF1	SLAMF1	0	0	0.507921	0.528596	0.52602	-0.00829924	0.808861	0.691516	-0.0469257	0.172688	0.153501	0.00323928	0.119424	0.0124788
X24215_8	Paired mesoderm homeobox protein 1	PRRX1	PRRX1	0	0	0.531404	0.514281	0.52602	-0.0497758	0.146592	0.610588	-0.0715407	0.0374863	0.0680842	0.193745	0.0434684	0.364664
X22973_8	Gro-gamma	Gro-g	CXCL3	0	0	0.512556	0.50564	0.526016	-0.0157541	0.64609	0.216564	-0.0139282	0.685818	-0.0464568	0.375505	0.0549464	0.25171
X13230_174	Ig gamma-2, Kappa	IgG2, Kappa	IGHG2	0	0	0.51281	0.550554	0.525979	-0.025402	0.459002	0.834388	0.0129065	0.707764	0.188696	0.000283117	0.194643	4.19429e-05
X25043_74	Succinyl-CoA:3-ketoacid-coenzyme A transferase 1, mitochondrial	SCOT	OXCT1	0	0	0.513461	0.540212	0.525971	0.0200955	0.558033	0.788406	-0.163533	1.74e-06	0.0100121	0.848609	0.115688	0.015537
X21645_6	Smad nuclear-interacting protein 1	SNIP1	SNIP1	0	0	0.505795	0.525435	0.525949	-0.00281099	0.934703	0.801279	0.105886	0.00204285	-0.0757992	0.147828	-0.0642265	0.180192
X11567_23	Zinc finger protein 10	ZNF10	ZNF10	0	0	0.521114	0.526571	0.525912	-0.0350608	0.306684	0.233491	0.0721565	0.0358714	0.0242246	0.644134	-0.13129	0.00598493
X3381_24	Tyrosine-protein kinase Lyn, isoform B	LYNB	LYN	0	0	0.555136	0.530766	0.525871	-0.100443	0.00333605	0.112886	0.209751	7.25e-10	-0.0827835	0.113869	-0.163699	0.000591545
X12936_38	Retinaldehyde-binding protein 1	RLBP1	RLBP1	0	0	0.580112	0.573197	0.525852	0.139669	4.29724e-05	0.000331634	-0.0997487	0.00368129	-0.0659651	0.208016	-0.153459	0.00129139
X6933_20	39S ribosomal protein L34, mitochondrial	RM34	MRPL34	0	0	0.512044	0.529002	0.525845	-0.0185726	0.588255	0.121153	0.0539521	0.116863	-0.0188814	0.718833	-0.130036	0.00648648
X25904_17	Dedicator of cytokinesis protein 2	DOCK2	DOCK2	0	0	0.529935	0.52325	0.525819	-0.0564125	0.0998628	0.169702	-0.101888	0.00300867	0.166069	0.00143066	0.266554	1.52317e-08
X3890_8	L-lactate dehydrogenase B chain	LDH-H 1	LDHB	0	0	0.502045	0.557966	0.525722	-0.0063837	0.852396	0.165851	-0.0895422	0.00916558	0.0842061	0.107768	0.132484	0.00554014
X9748_31	Glutathione S-transferase Mu 3	GSTM3-3	GSTM3	0	0	0.533065	0.559217	0.525718	0.0552053	0.107343	0.488817	-0.0698399	0.0422707	-0.0157678	0.763687	0.0362009	0.450343
X19371_18	Microtubule-associated protein RP/EB family member 1	MARE1	MAPRE1	0	0	0.527909	0.54099	0.525692	0.047317	0.167622	0.147027	0.0575851	0.0941628	-0.145288	0.005356	-0.148024	0.00191812
X18875_125	Chondrocalcin	Chondrocalcin	COL2A1	0	0	0.542213	0.532352	0.52567	0.0747114	0.029213	0.311921	0.124796	0.000274014	-0.20353	8.8e-05	-0.171074	0.000327516
X8275_31	Platelet endothelial aggregation receptor 1:Extracellular domain	PEAR1:ECD	PEAR1	0	0	0.51671	0.53771	0.525662	-0.0399899	0.243607	0.316522	-0.075804	0.0274713	0.230891	8.1e-06	0.319215	8.28567e-12
X9957_9	E3 ubiquitin-protein ligase RNF114	RN114	RNF114	0	0	0.528711	0.524959	0.525629	-0.0541979	0.113918	0.400275	-0.0356624	0.300167	0.149297	0.00420293	0.13674	0.00418631
X23326_10	Glutathione S-transferase A2	GSTA2	GSTA2	0	0	0.516936	0.523909	0.525621	-0.0273626	0.425064	0.34935	0.132265	0.000114157	-0.0526424	0.315205	-0.215033	5.74765e-06
X9254_18	High affinity immunoglobulin epsilon receptor subunit alpha	FCERA	FCER1A	0	0	0.501238	0.532077	0.525595	0.0111201	0.745849	0.0927141	0.0867553	0.0115896	-0.139991	0.00731302	-0.159031	0.000849295
X10847_1	Sialic acid-binding Ig-like lectin 15	SIG15	SIGLEC15	0	0	0.527452	0.510227	0.525569	0.0540273	0.115062	0.258053	0.105566	0.00210813	-0.189374	0.000268892	-0.224815	2.06364e-06
X11226_16	Ubiquitin-protein ligase E3A	UBE3A	UBE3A	0	0	0.534445	0.545342	0.525562	-0.0627033	0.0673453	0.091464	-0.009263	0.787905	0.141105	0.00685505	-0.0151162	0.752677
X21995_20	NOS	NOS	NOS3	0	0	0.548731	0.520469	0.525554	0.0854906	0.0125497	0.215588	-0.0114204	0.740119	-0.0851677	0.103793	-0.155877	0.00107852
X5909_51	Nucleoside diphosphate kinase A	Nucleoside diphosphate kinase A	NME1	0	0	0.541145	0.557091	0.525536	0.0709271	0.0384652	0.118466	-0.20887	8.57e-10	-0.0279824	0.593613	0.0769818	0.108044
X9906_21	Testican-3	TICN3	SPOCK3	0	0	0.508309	0.533358	0.525536	0.0139953	0.683326	0.82297	0.0286745	0.404863	-0.0916892	0.0798068	-0.0820244	0.0867755
X3196_6	Hyaluronan and proteoglycan link protein 1	HPLN1	HAPLN1	0.004694	0	0.522372	0.526012	0.525502	0.0358297	0.296192	0.199502	0.0434401	0.206866	-0.0860336	0.100313	-0.0447694	0.350473
X18897_31	Histone deacetylase 2	HDAC2	HDAC2	0	0	0.515498	0.545104	0.525491	-0.0388615	0.257175	0.315562	0.141155	3.79e-05	-0.0168227	0.748394	-0.116045	0.0152192
X24111_10	Elongation factor 1-gamma	EF1G	EEF1G	0	0	0.536175	0.529687	0.525487	0.0609125	0.0755653	0.391168	0.116394	0.00069394	-0.109621	0.036053	-0.276235	4.28804e-09
X21951_32	Aryl hydrocarbon receptor nuclear translocator	ARNT	ARNT	0	0	0.552662	0.534947	0.525484	-0.0879376	0.010228	0.149895	-0.0330583	0.336866	0.10961	0.036073	0.159571	0.000814923
X9327_3	Ly6/PLAUR domain-containing protein 1	LYPD1	LYPD1	0	0	0.529145	0.559362	0.52548	-0.0452323	0.187161	0.176171	0.026553	0.44052	-0.0474498	0.365374	0.136548	0.00424044
X19572_10	CCAAT/enhancer-binding protein gamma	CEBPG	CEBPG	0	0	0.531222	0.539873	0.525469	-0.0527263	0.124088	0.28989	0.0303941	0.377267	0.0120736	0.817937	0.0469307	0.327681
X4436_1	Ectonucleoside triphosphate diphosphohydrolase 3	ENTP3	ENTPD3	0	0	0.504875	0.526359	0.525413	0.0127621	0.709906	0.374414	0.144552	2.44e-05	-0.291184	1.39e-08	-0.345072	1.1527e-13
X11083_23	Gamma-enolase	NSE	ENO2	0	0	0.525343	0.547825	0.525379	0.0418182	0.222703	0.783664	-0.241622	1.05e-12	0.0189564	0.717763	0.157902	0.000925631
X10040_63	Tumor protein 63	P73L	TP63	0	0	0.5069	0.527781	0.525379	0.00861851	0.801659	0.865555	0.0414978	0.227917	-0.0815256	0.119486	-0.154383	0.00120585
X9962_1	Cadherin-related family member 5	MUCDL	CDHR5	0	0	0.514222	0.536165	0.525368	-0.0192941	0.573843	0.689977	0.0363417	0.291049	0.074302	0.156022	0.0252717	0.598288
X25244_9	Probable E3 ubiquitin-protein ligase HECTD3	HECD3	HECTD3	0	0	0.555457	0.536079	0.525361	-0.100917	0.00318934	0.0669258	-0.0189833	0.581371	0.0808951	0.122382	0.140292	0.00329395
X22845_3	28S ribosomal protein S14, mitochondrial	RT14	MRPS14	0	0	0.52585	0.54536	0.52535	0.0594759	0.082735	0.0333635	-0.00116339	0.973046	-0.143389	0.00599553	-0.168606	0.000400273
X2900_53	C-C motif chemokine 14	HCC-1	CCL14	0	0	0.508222	0.539106	0.525342	-0.0241008	0.482336	0.32808	-0.0738907	0.0316382	0.412399	1.84e-16	0.374398	5.4641e-16
X2607_54	Cytokine receptor-like factor 1:Cardiotrophin-like cytokine factor 1 Complex	CLF-1/CLC Complex	CRLF1|CLCF1	0	0	0.512596	0.508384	0.525342	-0.0218942	0.523337	0.929428	-0.0225963	0.5116	0.0590328	0.259961	0.143315	0.00267452
X4336_2	Serum amyloid A-1 protein	SAA	SAA1	-0.00617304	0	0.501603	0.535063	0.525327	-0.000402349	0.990643	0.24854	0.0186893	0.587239	0.034922	0.505402	-0.0549811	0.251411
X21595_8	Coiled-coil domain-containing protein 43	CCD43	CCDC43	0	0	0.506712	0.520491	0.525279	0.0236676	0.490247	0.535232	-0.1063	0.0019611	0.0748021	0.153247	0.119866	0.0121547
X2831_29	Kallikrein-11	Kallikrein 11	KLK11	0	0	0.507881	0.507193	0.525279	-0.0174848	0.610293	0.533507	0.116539	0.00068321	-0.0870241	0.0964468	-0.19339	4.70882e-05
X3666_17	Complement factor H-related protein 5	complement factor H-related 5	CFHR5	0	0	0.521796	0.535859	0.525227	-0.0299761	0.382181	0.233809	0.058335	0.0899478	0.0741188	0.157047	0.107533	0.0245754
X22432_83	Serine/threonine-protein kinase SRPK1	SRPK1	SRPK1	0	0	0.54624	0.537114	0.525201	0.0889591	0.00937762	0.100458	0.0619256	0.071823	-0.214773	3.42e-05	-0.218195	4.14872e-06
X19213_1	Serine protease inhibitor Kazal-type 4	ISK4	SPINK4	0	0	0.532405	0.523637	0.525201	-0.0607525	0.076338	0.0787109	-0.083669	0.0149217	0.247447	1.65e-06	0.227677	1.51575e-06
X10030_8	Adenine DNA glycosylase	MutY homolog	MUTYH	0	0	0.508532	0.517732	0.525186	0.0113728	0.740279	0.969169	-0.0352427	0.305895	-0.00821013	0.875612	-0.00753149	0.87525
X2906_55	Interleukin-4	IL-4	IL4	0	0	0.517408	0.51997	0.525167	0.0198179	0.563484	0.357344	0.022371	0.515819	-0.057409	0.273322	-0.224482	2.13855e-06
X8069_85	T-cell surface glycoprotein CD3 epsilon chain	CD3E	CD3E	0	0	0.527412	0.52959	0.52516	-0.0494504	0.149254	0.379756	0.0300892	0.382074	0.0344567	0.511094	0.104266	0.0293064
X22149_2	FUN14 domain-containing protein 1	FUND1	FUNDC1	0	0	0.531083	0.514493	0.52516	-0.0577033	0.09233	0.147367	-0.0103528	0.763654	0.101091	0.0533186	0.0807718	0.0917153
X16865_62	TATA-binding protein-associated factor 2N	RBP56	TAF15	0	0	0.526735	0.52481	0.525152	0.0452199	0.187282	0.812991	0.0473928	0.168449	-0.0652812	0.212779	-0.167045	0.000453741
X16756_30	Growth/differentiation factor 7	GDF7	GDF7	0	0	0.537185	0.536418	0.525126	0.0766465	0.0252704	0.0692035	-0.0765371	0.0260049	-0.0634163	0.226166	-0.0176915	0.712275
X13133_73	Latent-transforming growth factor beta-binding protein 4	LTBP4	LTBP4	0	0	0.526668	0.515372	0.525126	-0.0508379	0.138157	0.383962	-0.0779975	0.0232839	0.128634	0.013788	0.294973	3.19341e-10
X19794_10	Uridine diphosphate glucose pyrophosphatase	NUD14	NUDT14	0	0	0.508063	0.543707	0.525122	0.016765	0.625075	0.685359	-0.00560443	0.870699	-0.0591475	0.259035	-0.0326075	0.496585
X24702_31	Coiled-coil domain-containing protein 149	CC149	CCDC149	0	0	0.524935	0.511359	0.525122	0.0439314	0.200176	0.199986	-0.00228038	0.947195	-0.0195182	0.709771	-0.0809717	0.0909124
X17161_1	Dolichyl-diphosphooligosaccharide--protein glycosyltransferase 48 kDa subunit	OST48	DDOST	0	-0.0388657	0.53288	0.502293	0.525085	-0.0650763	0.0575989	0.309004	-0.11528	0.000781424	0.177912	0.000627771	0.215061	5.73155e-06
X24977_18	Villin-like protein	VILL	VILL	0	0	0.511286	0.523801	0.525067	0.0245522	0.474169	0.176173	0.0886327	0.00990167	-0.0983778	0.0600804	-0.0924167	0.0535413
X3042_7	Myoglobin	Myoglobin	MB	0	0	0.520969	0.53908	0.525015	-0.041684	0.224192	0.0870143	-0.0236733	0.491678	0.294597	9.21e-09	0.21415	6.29026e-06
X23588_9	Hydroxysteroid dehydrogenase-like protein 2	HSDL2	HSDL2	0	0.0158498	0.540167	0.503563	0.524959	-0.0701393	0.0406762	0.504226	-0.14497	2.31e-05	0.126791	0.0152174	0.295395	3.00536e-10
X6260_14	Tenascin	Tenascin	TNC	0	0	0.511318	0.515521	0.524925	0.0090923	0.791001	0.634138	-0.242855	8.03e-13	0.301153	4.13e-09	0.401891	2.15471e-18
X7943_16	CUB and zona pellucida-like domain-containing protein 1	CUZD1	CUZD1	0	0	0.547984	0.544445	0.524914	0.0791107	0.0209216	0.0384332	-0.127334	0.000204571	0.0346226	0.50906	0.191224	5.74172e-05
X5813_58	Erythropoietin	Epo	EPO	0	0	0.532159	0.519922	0.524899	0.0510673	0.136385	0.264804	0.0689404	0.0450029	-0.0334272	0.523806	-0.105227	0.0278408
X10830_5	EF-hand calcium-binding domain-containing protein 14:N-term	K0494:N-term	EFCAB14	0	0	0.510565	0.527602	0.524884	0.0351636	0.305268	0.0381761	0.0208213	0.545325	-0.0691791	0.186658	-0.150419	0.00161382
X5751_14	LETM1 domain-containing protein 1	HCCR-1	LETMD1	0	0	0.523532	0.531828	0.52488	0.0401628	0.241573	0.902006	0.0612633	0.0749209	-0.0920137	0.0787416	-0.142142	0.00290108
X4437_56	Ectonucleoside triphosphate diphosphohydrolase 5	ENTP5	ENTPD5	0	0	0.50999	0.534352	0.524877	-0.0204533	0.551044	0.911461	0.196544	8.19e-09	-0.26742	2.06e-07	-0.353953	2.41589e-14
X5475_10	Protein kinase C beta type (splice variant beta-II)	PKC-B-II	PRKCB	0	-0.0388657	0.508254	0.54752	0.52484	0.00990728	0.77276	0.166948	-0.206933	1.23e-09	0.00353817	0.946217	0.0624546	0.192535
X21002_1	NudC domain-containing protein 2	NUDC2	NUDCD2	0	0	0.511497	0.5244	0.524836	0.0201869	0.556242	0.976654	-0.245381	4.57e-13	0.209449	5.39e-05	0.336787	4.73897e-13
X9110_2	Synaptotagmin-17	SYT17	SYT17	0	0	0.535521	0.520059	0.524817	0.0682766	0.0463352	0.162062	0.134092	9.15e-05	-0.223514	1.59e-05	-0.341887	1.99487e-13
X11926_23	Alpha- and gamma-adaptin-binding protein p34	P34	AAGAB	0	-0.0388657	0.506261	0.609075	0.524787	0.00585181	0.86457	0.85889	-0.23671	3.08e-12	0.0643765	0.219201	0.204659	1.61945e-05
X11336_9	Fanconi anemia group F protein	FANCF	FANCF	0	0	0.510927	0.533964	0.524784	0.00996623	0.771445	0.47163	0.105085	0.00220987	0.0269701	0.607044	-0.201518	2.19378e-05
X13594_158	ADP-ribosylation factor-binding protein GGA1	GGA1	GGA1	0	-0.0643914	0.505277	0.556131	0.52478	0.00415263	0.903664	0.886029	-0.26393	5.99e-15	0.197965	0.000137776	0.306345	6.00334e-11
X5005_4	Mitogen-activated protein kinase 12	MK12	MAPK12	0	0	0.53739	0.530837	0.524773	0.055264	0.106969	0.365032	-0.0677925	0.0487044	0.0466517	0.373503	-0.0942722	0.0489002
X12461_8	NAD-dependent protein deacylase sirtuin-5, mitochondrial	SIRT5	SIRT5	0	0	0.541215	0.549489	0.524743	0.0721482	0.03524	0.330478	-0.0390405	0.256674	0.0374764	0.474754	0.144209	0.00251271
X21853_3	CLEC-1	CLC1A	CLEC1A	0	0	0.541084	0.538216	0.524743	-0.070238	0.0403934	0.0577213	0.0201914	0.557553	0.149638	0.00411616	0.181295	0.000138593
X24648_8	Histone RNA hairpin-binding protein	SLBP	SLBP	0	0	0.538984	0.510179	0.524724	0.0643112	0.0606048	0.360931	0.102668	0.00279263	-0.141442	0.00672153	-0.287286	9.48631e-10
X13095_51	Lithostathine-1-alpha	PSP	REG1A	0	0	0.50265	0.543909	0.524706	-0.00275769	0.935938	0.477646	-0.119696	0.000485054	0.389715	1.01e-14	0.414858	1.31594e-19
X4712_28	Apolipoprotein D	Apo D	APOD	0	0	0.529602	0.543086	0.524706	-0.0459275	0.180467	0.0950541	0.0452026	0.189017	0.0076809	0.883571	-0.0392549	0.413031
X12875_28	Ubiquitin domain-containing protein 2	UBTD2	UBTD2	0	0	0.521519	0.536459	0.524706	0.0361239	0.292241	0.840057	0.115295	0.000780144	-0.097718	0.0618272	-0.217154	4.6211e-06
X19289_29	Uroporphyrinogen decarboxylase	DCUP	UROD	0	0	0.516771	0.559366	0.524702	0.0245007	0.475098	0.826653	-0.20931	7.89e-10	0.0494362	0.345624	0.198586	2.90004e-05
X2993_1	Interleukin-18 receptor accessory protein	IL-18 Rb	IL18RAP	0	0	0.530979	0.511861	0.524683	-0.059888	0.0806244	0.163213	0.0759932	0.0270862	-0.0131904	0.801431	0.0730576	0.127284
X17320_19	L-aminoadipate-semialdehyde dehydrogenase-phosphopantetheinyl transferase	ADPPT	AASDHPPT	0	-0.0158848	0.509703	0.549206	0.524665	0.0177236	0.605424	0.943017	-0.263943	5.97e-15	0.105383	0.0439233	0.211336	8.36381e-06
X15562_24	Beta-glucuronidase	BGLR	GUSB	0	0	0.502546	0.523872	0.524657	0.00316038	0.926608	0.691853	-0.0366028	0.287595	-0.0766008	0.143578	-0.0649303	0.175456
X9750_7	Protein S100-A4	S100A4	S100A4	0	0	0.527507	0.532844	0.524616	0.0527856	0.123664	0.319142	0.1143	0.000866767	-0.161637	0.00192131	-0.311396	2.79139e-11
X12760_34	Zinc finger protein 774	ZN774	ZNF774	0	0	0.530574	0.516143	0.52459	0.06379	0.0627258	0.0256948	0.00471163	0.891156	-0.188563	0.000285987	-0.135554	0.00452978
X3363_31	Tyrosine-protein kinase CSK	CSK	CSK	0	0	0.550417	0.5437	0.524579	-0.0964516	0.00483589	0.151353	0.121779	0.000385128	-0.00703929	0.893236	-0.0438671	0.360278
X25048_30	Protein kinase C and casein kinase substrate in neurons protein 2	PACN2	PACSIN2	0	0	0.522291	0.533425	0.524571	-0.0436876	0.202686	0.42455	0.128068	0.000187796	-0.100942	0.0536734	-0.0944512	0.0484708
X3044_3	C-C motif chemokine 18	PARC	CCL18	0	0	0.537063	0.536046	0.524557	-0.0684752	0.0457017	0.143868	-0.0196855	0.567468	0.23675	4.67e-06	0.332023	1.04833e-12
X13924_13	Myocardial zonula adherens protein	MYZAP	MYZAP	0	0	0.519815	0.517509	0.524549	-0.0362174	0.290993	0.139588	-0.0287197	0.404122	0.174949	0.000775225	0.188245	7.5153e-05
X11158_40	Bicaudal D-related protein 1	BICR1	BICDL1	0	0	0.569555	0.53217	0.524531	-0.125258	0.000247102	0.00274009	-0.00858962	0.802994	0.13663	0.00886482	0.0796176	0.096464
X23337_54	BTB/POZ domain-containing adapter for CUL3-mediated RhoA degradation protein 3	BACD3	KCTD10	0	0	0.522734	0.521884	0.524523	-0.034563	0.313608	0.756786	0.114002	0.00089437	-0.0602151	0.250521	0.00475676	0.921016
X4330_4	Prostate-specific antigen	PSA	KLK3	0	0	0.512235	0.512111	0.524523	-0.0263365	0.442641	0.794936	0.0468278	0.173587	0.0137108	0.79377	-0.0339034	0.479623
X13503_19	PRA1 family protein 3	PRAF3	ARL6IP5	0	0	0.521825	0.519739	0.524516	0.0445244	0.194164	0.481246	0.127719	0.000195617	-0.203633	8.72e-05	-0.311999	2.54477e-11
X10088_37	Adenine phosphoribosyltransferase	APT	APRT	0	0	0.536525	0.531973	0.524449	-0.0583163	0.0889155	0.495303	0.0901255	0.00871951	-0.0185722	0.723247	-0.0139704	0.770882
X7788_1	ATP synthase-coupling factor 6, mitochondrial	CF6	ATP5PF	0	0	0.5481	0.554307	0.524434	0.0845586	0.0135497	0.273802	-0.230776	1.09e-11	0.113019	0.0306404	0.202979	1.90613e-05
X24489_34	Transcription factor HES-3	HES3	HES3	0	0	0.509975	0.525744	0.52443	0.0174033	0.611959	0.610398	0.067021	0.0513326	-0.0746278	0.15421	-0.138726	0.00366366
X7083_74	Matrilin-4	MATN4	MATN4	0	0	0.540772	0.538756	0.524423	0.0612654	0.0738837	0.2294	-0.03546	0.30292	-0.146192	0.00507372	-0.00989276	0.836622
X8956_96	Scavenger receptor class F member 2:Extracellular domain	SREC-II:ECD	SCARF2	0	0	0.531772	0.530774	0.524423	-0.0622408	0.0693947	0.108349	-0.13991	4.44e-05	0.36033	1.16e-12	0.4578	5.03611e-24
X8832_55	Bone marrow stromal antigen 2	BST-2	BST2	0	0	0.533774	0.522595	0.524423	0.0535277	0.118465	0.320948	0.0512437	0.136421	0.0190197	0.716861	-0.0129933	0.786504
X21350_29	Protein lin-28 homolog B	LN28B	LIN28B	0	0	0.535495	0.508202	0.524423	0.0703028	0.0402088	0.240943	0.07485	0.0294859	-0.133283	0.0106942	-0.168899	0.000390898
X14708_59	Complement component C8 gamma chain	CO8G	C8G	0	0	0.521258	0.537512	0.524389	-0.0442429	0.197001	0.347616	0.0401252	0.243684	0.178801	0.000588866	0.172574	0.000289557
X14031_18	Fibroblast growth factor 7	FGF7	FGF7	0	0	0.504056	0.524501	0.524363	0.00389515	0.909611	0.881707	0.0177489	0.606187	-0.0388795	0.458363	-0.125093	0.0088494
X9190_7	CD63 antigen	CD63	CD63	0	0	0.531893	0.52446	0.524356	-0.063019	0.0659752	0.190372	-0.131313	0.000127976	0.0969351	0.0639542	0.227912	1.47743e-06
X9606_4	Nuclear pore membrane glycoprotein 210-like	P210L	NUP210L	0	0	0.534445	0.515934	0.524348	0.0644129	0.0601977	0.379516	0.00184023	0.957377	-0.0280348	0.592921	-0.0952123	0.0466801
X11568_2	Peptidyl-prolyl cis-trans isomerase FKBP1B	FKB1B	FKBP1B	0	0	0.559719	0.547296	0.524337	0.112927	0.000960143	0.00495826	-0.0711308	0.038595	-0.0814416	0.119869	-0.149321	0.00174737
X6923_1	Procollagen-lysine,2-oxoglutarate 5-dioxygenase 2	PLOD2	PLOD2	0	0	0.505494	0.517059	0.524333	-0.0110753	0.746836	0.554281	0.171505	5.21e-07	-0.324377	2.05e-10	-0.379338	2.09908e-16
X21837_3	Translocon-associated protein subunit beta	SSRB	SSR2	0	0	0.509232	0.532468	0.524329	-0.0106047	0.757249	0.429589	0.00717633	0.834897	0.0543088	0.300109	0.00917661	0.8483
X11468_15	Probable RNA-binding protein 19	RBM19	RBM19	0	0	0.533759	0.513864	0.524322	0.0529693	0.122361	0.161527	0.173566	3.78e-07	-0.163507	0.00169798	-0.296101	2.71424e-10
X25099_4	Calcium-dependent secretion activator 2	CAPS2	CADPS2	0	0	0.550603	0.53981	0.524303	0.0842549	0.0138904	0.308913	0.0175223	0.610793	-0.0592927	0.257865	-0.10878	0.0229518
X15688_30	Protein ERGIC-53	Mannose-binding lectin	LMAN1	0	0	0.526628	0.543961	0.524274	-0.0445669	0.193738	0.622996	-0.0717413	0.0369536	0.120911	0.020682	0.172995	0.000279656
X3059_50	Tumor necrosis factor ligand superfamily member 13B	BAFF	TNFSF13B	0	0	0.515597	0.531236	0.524255	-0.0319158	0.352133	0.300375	-0.0391178	0.255732	0.00688633	0.895543	0.0964049	0.0439862
X10574_10	Beta-2-microglobulin	b2-Microglobulin	B2M	0	0	0.517627	0.507811	0.524229	-0.0344989	0.314506	0.919341	-0.055415	0.107254	0.0315806	0.547004	0.0848182	0.0765274
X3642_4	SLAM family member 5	SLAF5	CD84	0	0	0.501904	0.524065	0.524214	0.00817144	0.811749	0.891194	-0.244986	4.99e-13	0.210092	5.1e-05	0.278644	3.10394e-09
X10571_14	Alpha-1,3-mannosyl-glycoprotein 2-beta-N-acetylglucosaminyltransferase	MGAT1	MGAT1	0	0	0.528393	0.525573	0.524203	-0.04974	0.146883	0.485955	-0.0937752	0.00634235	0.126448	0.0154978	0.219774	3.51901e-06
X9739_4	DNA mismatch repair protein Msh2	MSH2	MSH2	0	0	0.520628	0.545375	0.524181	-0.0314917	0.358571	0.90574	0.00438801	0.898591	0.0746863	0.153886	0.08698	0.0692915
X18411_83	ADP-ribosylation factor-like protein 15	ARL15	ARL15	0	0	0.505297	0.526913	0.524173	0.00634349	0.853315	0.185863	-0.0885026	0.0100112	0.047191	0.367998	0.0233857	0.62588
X23292_1	Centrosomal protein of 112 kDa	CE112	CEP112	0	0	0.50219	0.501102	0.524173	0.00233146	0.945823	0.0737661	0.018969	0.581657	-0.0467078	0.372928	0.0865289	0.0707533
X19166_15	40S ribosomal protein S19	RS19	RPS19	0	0	0.550504	0.551109	0.524169	-0.0833323	0.0149722	0.0804141	0.0157606	0.64712	0.104873	0.0449622	-0.0704417	0.141518
X2751_16	Azurocidin	Azurocidin	AZU1	0	0	0.54681	0.527081	0.524147	0.0724026	0.0345979	0.258114	0.165389	1.32e-06	-0.164092	0.00163326	-0.333901	7.6793e-13
X12411_60	Protein max	MAX	MAX	0	0	0.532712	0.506485	0.524147	0.0686364	0.0451931	0.00414958	0.0844925	0.013959	-0.175111	0.000766449	-0.20971	9.84357e-06
X3624_3	Serine protease 27	Marapsin	PRSS27	0	0	0.540543	0.515305	0.52414	-0.0670066	0.0505613	0.177054	-0.0916676	0.00763208	0.105578	0.0435323	0.197657	3.16567e-05
X4996_66	Histidine-rich glycoprotein	HRG	HRG	0	0	0.536782	0.544728	0.524136	-0.0666026	0.0519716	0.414977	0.0194242	0.572625	0.155649	0.00282855	0.185669	9.4534e-05
X8874_53	Ceroid-lipofuscinosis neuronal protein 5:Lumenal domain	CLN5:LD	CLN5	0	0	0.505277	0.538715	0.524132	0.0115298	0.736825	0.672371	-0.0376283	0.274293	-0.00133779	0.979651	0.0436027	0.363184
X5061_27	ICOS ligand	B7-H2	ICOSLG	0	0	0.519106	0.512792	0.524128	-0.0378792	0.269406	0.419208	-0.0463559	0.177967	0.0439506	0.401832	0.15533	0.00112361
X22401_26	Guanylyl cyclase-activating protein 2	GUC1B	GUCA1B	0	0	0.50149	0.524501	0.524106	-0.00773402	0.821652	0.0653849	0.0438841	0.202258	0.0264343	0.614208	0.055107	0.250325
X20993_13	BEN domain-containing protein 6	BEND6	BEND6	0	0	0.522537	0.505763	0.524106	-0.0342157	0.318498	0.605486	-0.0418526	0.223962	0.0700162	0.18137	0.086681	0.0702577
X11549_6	Insulin gene enhancer protein ISL-1	ISL1	ISL1	0	0	0.509949	0.528317	0.524102	-0.00523373	0.878758	0.288945	-0.034019	0.323005	-0.00087868	0.986634	-0.0207385	0.665499
X9028_5	Poly(A) RNA polymerase, mitochondrial	PAPD1	MTPAP	0.0109605	0	0.505801	0.507602	0.524076	-0.00443836	0.897071	0.708778	-0.014094	0.68228	-0.0273761	0.601641	-0.0300125	0.531484
X24276_171	Tetratricopeptide repeat protein 25	TTC25	TTC25	0	0	0.518715	0.515424	0.524054	0.0262147	0.444755	0.390864	0.0536297	0.119069	-0.054344	0.299795	-0.0231331	0.629617
X3186_2	Complement C2	C2	C2	0	0	0.505977	0.541727	0.524006	-0.0147238	0.667802	0.606801	-0.00998762	0.771756	0.224246	1.49e-05	0.136726	0.00419031
X2247_20	Prokineticin-1	EG-VEGF	PROK1	0	0	0.514925	0.520677	0.523998	-0.031225	0.362659	0.0294721	0.0717806	0.0368499	0.0557561	0.287394	-0.0950796	0.0469884
X17797_1	Cullin-1	CUL1	CUL1	0	0	0.504476	0.54179	0.523994	0.00972271	0.776881	0.498394	-0.106515	0.00191993	0.0602713	0.250078	0.0491242	0.305554
X12702_13	E3 ubiquitin-protein ligase pellino homolog 2	PELI2	PELI2	0	0	0.549804	0.52669	0.523987	0.0909543	0.00789614	0.0274807	0.0339944	0.323355	-0.136822	0.00876865	-0.201727	2.15028e-05
X25050_82	Tripeptidyl-peptidase 2	TPP2	TPP2	0	0	0.534613	0.524397	0.523987	-0.0622869	0.0691881	0.217007	0.0857259	0.0126193	0.035984	0.492536	-0.0852954	0.0748796
X12856_14	Transmembrane protein 237	TM237	TMEM237	0	0	0.528523	0.527587	0.523976	-0.0510341	0.136641	0.531599	-0.0260232	0.449696	0.103492	0.0478759	0.192293	5.20776e-05
X21144_160	Serine/threonine-protein kinase Sgk1	SGK1	SGK1	0	0	0.528789	0.50471	0.523946	0.0428256	0.211747	0.712806	-0.0720115	0.0362463	-0.0290041	0.580195	0.0126508	0.792002
X15418_25	Mitogen-activated protein kinase 10	MK10	MAPK10	0	0	0.501817	0.534069	0.52392	3.56236e-05	0.999172	0.932426	-0.211249	5.45e-10	0.19023	0.000251881	0.283425	1.61919e-09
X19765_17	C-type lectin domain family 4 member G	CLC4G	CLEC4G	0	0	0.53989	0.537911	0.523879	-0.0664998	0.0523354	0.243836	0.003797	0.91219	0.0397987	0.447799	0.129868	0.00655633
X11462_8	RNA binding protein fox-1 homolog 2	RBM9	RBFOX2	0	0	0.508187	0.553629	0.523872	0.00392467	0.908929	0.14346	-0.213554	3.5e-10	0.174133	0.000821193	0.26359	2.22321e-08
X23703_8	PDZ and LIM domain protein 5	PDLI5	PDLIM5	0	-0.0214538	0.523752	0.567378	0.523864	0.0386686	0.259547	0.92222	-0.306221	7.98e-20	0.341388	1.93e-11	0.446227	9.01762e-23
X10053_5	Integrin-linked protein kinase	ILK1	ILK	0	0	0.51027	0.502718	0.523846	0.0159555	0.64188	0.776528	0.140046	4.36e-05	-0.128675	0.0137578	-0.155862	0.00107967
X18895_54	Glutathione S-transferase Mu 4	GSTM4	GSTM4	0	0	0.555671	0.536116	0.523801	-0.100702	0.00325497	0.0589106	-0.0163252	0.635381	0.10816	0.03862	0.10398	0.0297563
X14064_21	Peptidoglycan recognition protein 1	PGRP-S	PGLYRP1	0	0	0.57213	0.55284	0.523771	0.111179	0.00115194	0.000814539	-0.0609785	0.0762863	-0.0227082	0.665013	-0.00211616	0.964816
X15559_5	Anthrax toxin receptor 2	ANTR2	ANTXR2	0	0	0.520691	0.524962	0.523771	-0.0376985	0.271699	0.350023	0.011397	0.740633	0.138646	0.00790218	0.217771	4.33521e-06
X8253_2	Protein O-linked-mannose beta-1,2-N-acetylglucosaminyltransferase 1	PMGT1	POMGNT1	0	0	0.521712	0.526716	0.523752	0.0311512	0.363795	0.757055	-0.00607442	0.859963	0.0123497	0.813848	-0.0387866	0.418631
X12454_105	N-terminal Xaa-Pro-Lys N-methyltransferase 1	NTM1A	NTMT1	0	0	0.537465	0.531031	0.523738	0.0580545	0.090361	0.0125219	0.0569494	0.0978578	-0.103627	0.047585	-0.0323526	0.499959
X13421_17	Protein kish-B	KISHB	TMEM167B	0.00666896	0	0.512093	0.544921	0.523726	-0.0266215	0.437717	0.689462	0.121033	0.000418493	-0.0217093	0.67891	-0.0612329	0.201398
X10955_4	C-type lectin domain family 10 member A	CLC10	CLEC10A	0	0	0.50703	0.544191	0.523719	0.0092479	0.787509	0.613199	-0.000605759	0.985963	0.0066109	0.899698	-0.0440394	0.358393
X5930_54	Troponin I, cardiac muscle	Troponin I	TNNI3	0	0	0.548256	0.530744	0.523719	-0.0683628	0.0460593	0.0093512	-0.0363678	0.290702	0.109206	0.0367678	-0.0175777	0.714044
X6213_10	Choriogonadotropin subunit beta variant 2	CGB2	CGB2	0	0	0.511176	0.52988	0.523685	0.0190642	0.578417	0.987698	0.0393603	0.252795	-0.0104547	0.842003	-0.234765	6.93675e-07
X5099_14	Lymphocyte activation gene 3 protein	LAG-3	LAG3	0	0	0.515834	0.532345	0.523678	-0.0179937	0.599938	0.244095	0.0521231	0.129812	0.0376619	0.472569	0.0365862	0.445533
X17511_10	Ribonuclease P protein subunit p30	RPP30	RPP30	0	0	0.51152	0.526448	0.523678	-0.0149583	0.662835	0.538361	0.00256756	0.940557	0.031523	0.547735	0.0945096	0.0483314
X24643_21	Lambda-crystallin homolog	CRYL1	CRYL1	0	0	0.516609	0.547423	0.523671	0.0145507	0.671479	0.00510456	-0.0719796	0.0363292	-0.0465431	0.374617	0.0297567	0.534991
X15591_28	Glutathione peroxidase 1	Glutathione peroxidase	GPX1	0	0	0.544032	0.533023	0.523652	0.0652792	0.0568229	0.219387	0.0564822	0.100647	-0.235878	5.07e-06	-0.291093	5.55557e-10
X12543_76	Zinc finger protein 560	ZN560	ZNF560	0	0	0.501935	0.541734	0.52363	-0.00779429	0.820286	0.392959	-0.0274588	0.42508	0.120285	0.0213531	0.0466111	0.33099
X12664_19	Tyrosine-protein phosphatase non-receptor type 13	PTN13	PTPN13	0	0	0.50762	0.530398	0.523585	-0.011314	0.741574	0.943747	-0.0254825	0.459172	0.0110101	0.833729	0.0567655	0.236329
X11565_58	Zinc finger protein 23	ZNF23	ZNF23	0	0	0.556768	0.511422	0.523544	0.0946091	0.00571506	0.0489938	-0.0518444	0.131878	-0.0953439	0.0684626	-0.00527135	0.912504
X13743_56	Cullin-4B	CUL4B	CUL4B	0	0	0.53351	0.529445	0.523518	0.0501743	0.143382	0.349909	-0.240878	1.24e-12	0.0860483	0.100255	0.205046	1.55949e-05
X22810_41	TIMELESS-interacting protein	TIPIN	TIPIN	0	0	0.500078	0.524683	0.523518	-0.00214848	0.950069	0.997209	-0.021503	0.532243	-0.0428667	0.413552	0.0112842	0.814036
X10539_30	CD99 antigen-like protein 2	C99L2	CD99L2	0	0	0.548551	0.511329	0.523484	0.0862913	0.0117434	0.171278	0.124515	0.000282946	-0.245424	2.01e-06	-0.260444	3.30421e-08
X4163_5	Histone H2A.z	Histone H2A.z	H2AZ1	0	0	0.519858	0.527956	0.523469	0.0337882	0.324586	0.917713	0.0884511	0.0100548	-0.121653	0.0199099	-0.203979	1.73015e-05
X22505_24	NAD kinase 2, mitochondrial	NAKD2	NADK2	0	0	0.522083	0.503261	0.523469	-0.0392266	0.252729	0.764484	0.0366109	0.287487	0.01378	0.792753	0.0838085	0.0801115
X3236_12	Glycogen synthase kinase-3 beta	GSK-3 beta	GSK3B	0	0	0.506674	0.527412	0.523458	-0.0130361	0.703968	0.984147	0.0970809	0.00471031	0.0508115	0.332354	0.0236384	0.622151
X5743_82	Cocaine- and amphetamine-regulated transcript protein	CART	CARTPT	0	0	0.544464	0.51338	0.523436	0.0789563	0.0211737	0.31047	0.146044	2e-05	-0.20794	6.11e-05	-0.279732	2.67966e-09
X21138_2	Nucleoplasmin-2	NPM2	NPM2	0	0	0.502124	0.51621	0.523384	-0.0139421	0.684463	0.442903	-0.100171	0.00353869	0.159852	0.00215905	0.23202	9.41632e-07
X13699_6	Prostate-specific antigen	PSA	KLK3	0	0	0.532738	0.543547	0.523376	-0.0547581	0.110224	0.79097	0.0394185	0.252093	0.0490434	0.349474	0.0970122	0.0426654
X23413_38	Ankyrin repeat domain-containing protein 45	ANR45	ANKRD45	0	0	0.507059	0.513049	0.523373	-0.0225711	0.510573	0.233353	0.0322695	0.348527	0.0408678	0.435686	-0.0177723	0.711019
X21981_2	Integrin alpha-M	Integrin alpha-M	ITGAM	0	0	0.533317	0.551034	0.523328	0.0549828	0.108768	0.341086	-0.0621881	0.0706244	-0.114844	0.0280316	-0.0624924	0.192265
X9864_38	Tetratricopeptide repeat protein 1	TTC1	TTC1	0	0	0.50872	0.556291	0.523306	0.0157211	0.64678	0.509896	-0.198682	5.59e-09	0.0398285	0.447459	0.151643	0.00147604
X2989_17	Interferon gamma	IFN-g	IFNG	0	0	0.553461	0.544244	0.523295	0.0762203	0.0260969	0.00614078	0.0319758	0.352934	0.0228015	0.66372	-0.0739701	0.122589
X19145_4	Melanoregulin	MREG	MREG	0	0	0.544015	0.530811	0.523257	0.080489	0.0187855	0.259508	0.0354676	0.302817	-0.0869948	0.0965594	-0.240867	3.4687e-07
X20970_14	Dysbindin domain-containing protein 1	DBND1	DBNDD1	0	0	0.503281	0.530547	0.523224	0.00975496	0.77616	0.232258	-0.0546917	0.111924	0.0432585	0.409292	0.0616476	0.198357
X3581_53	Alpha-2-HS-glycoprotein	a2-HS-Glycoprotein	AHSG	0	0	0.515816	0.551377	0.523175	-0.0326507	0.341149	0.422023	0.0907155	0.00828813	0.124069	0.0175663	0.0886819	0.0639978
X12449_16	Peptidyl-prolyl cis-trans isomerase H	PPIH	PPIH	0	0	0.518452	0.531519	0.523149	0.0266919	0.436507	0.757419	-0.0938049	0.00632566	0.0156961	0.76473	0.0634692	0.185393
X24251_44	Ribonuclease P protein subunit p25-like protein	RP25L	RPP25L	0	0	0.519057	0.52701	0.523134	0.0328228	0.338609	0.210964	-0.011264	0.743553	-0.0832196	0.111971	-0.0985487	0.0394722
X9884_8	Peptidyl-prolyl cis-trans isomerase-like 1	PPIL1	PPIL1	0	0	0.576814	0.580003	0.523127	0.124534	0.00026855	0.00216125	-0.148414	1.46e-05	-0.0869393	0.0967733	0.0100493	0.834073
X19287_59	Density-regulated protein	DENR	DENR	0	0	0.538212	0.526295	0.523108	0.0792319	0.0207257	0.0156753	-0.0912425	0.00791898	-0.114808	0.0280802	-0.100535	0.0356463
X11514_196	CD59 glycoprotein	CD59	CD59	0	0	0.520769	0.514914	0.523093	-0.0483261	0.158734	0.114992	-0.0915914	0.00768281	0.194462	0.000181579	0.189498	6.71388e-05
X8390_25	Cytochrome c oxidase subunit 7A1, mitochondrial	CX7A1	COX7A1	-0.00615023	0	0.508465	0.530632	0.523075	0.0167137	0.626134	0.608398	-0.00698212	0.839303	-0.00195398	0.970282	-0.147115	0.00204678
X18255_6	NADH-cytochrome b5 reductase 1	NB5R1	CYB5R1	0	0	0.51645	0.504099	0.523064	0.0362167	0.291002	0.296129	-0.00895193	0.794866	-0.0820404	0.117162	-0.109327	0.02227
X2743_5	Sonic hedgehog protein	Sonic Hedgehog	SHH	0	0	0.524869	0.529084	0.523049	-0.0424258	0.216047	0.936194	-0.00278657	0.935497	0.175346	0.000753802	0.187025	8.38078e-05
X6473_55	BPI fold-containing family A member 1	PLUNC	BPIFA1	0	0	0.529217	0.50436	0.523041	0.0531653	0.120983	0.261228	0.14885	1.38e-05	-0.142795	0.00620911	-0.290678	5.89127e-10
X17773_26	Gamma-soluble NSF attachment protein	SNAG	NAPG	0	0	0.503651	0.553506	0.523026	-0.0022331	0.948105	0.861629	0.0246516	0.473949	0.048543	0.354419	-0.0446644	0.351606
X10449_31	Protein shisa-2 homolog	TMM46	SHISA2	0	0	0.500634	0.553309	0.523023	-0.00253055	0.941205	0.278039	-0.0261763	0.447033	0.021171	0.686444	0.0327094	0.495239
X9565_6	PRKC apoptosis WT1 regulator protein	PAWR	PAWR	0	0	0.550267	0.547523	0.523	-0.0858105	0.0122219	0.127457	0.0613949	0.074297	0.0537286	0.305309	0.110764	0.0205599
X2692_74	Phospholipase A2, membrane associated	NPS-PLA2	PLA2G2A	0	0	0.517515	0.516195	0.522982	-0.0239578	0.484941	0.30129	0.0344415	0.317028	0.174047	0.000826129	0.0932639	0.0513788
X25278_41	Rho GTPase-activating protein 6	RHG06	ARHGAP6	0	0	0.508876	0.532773	0.522915	0.0212168	0.536273	0.254279	0.0833981	0.015251	-0.0466554	0.373465	-0.0293276	0.540898
X17752_24	Arginase-2, mitochondrial	Arginase	ARG2	0	0	0.502161	0.520558	0.522915	0.00723103	0.833075	0.567531	0.0504941	0.142256	-0.0888634	0.0895831	0.00568982	0.90559
X5594_87	LDLR chaperone MESD	MESD2	MESD	0	0	0.528552	0.512621	0.522915	0.0471667	0.168978	0.331971	-0.0752869	0.0285482	0.0554157	0.290351	0.0909861	0.0573651
X7919_278	Protein FAM3D	FAM3D	FAM3D	0	0	0.518102	0.522226	0.522907	-0.0339685	0.322009	0.5645	0.0534978	0.119981	0.0128122	0.807011	0.153531	0.00128458
X6485_59	Immunoglobulin lambda-like polypeptide 1	IGLL1	IGLL1	0	0	0.5078	0.536883	0.522896	-0.0193715	0.572307	0.898477	0.0487168	0.156856	-0.110767	0.0341439	-0.0702649	0.142522
X12478_15	60S ribosomal protein L30	RL30	RPL30	0	0	0.548916	0.539847	0.522889	-0.0847966	0.013288	0.256282	0.0364453	0.289675	0.067218	0.199489	0.0538457	0.261348
X8255_34	Protein MRVI1	MRVI1	IRAG1	0	0	0.554233	0.519922	0.522889	-0.0939154	0.00608172	0.0134497	0.00167001	0.961316	0.106587	0.0415534	0.123171	0.00995822
X8975_26	Cell differentiation protein RCD1 homolog	RCD1	CNOT9	0	-0.0388657	0.521001	0.564601	0.522863	0.0352352	0.304284	0.782727	-0.246304	3.71e-13	0.0240888	0.645993	0.105605	0.0272802
X12855_16	Cas scaffolding protein family member 4	CT032	CASS4	0	0	0.553756	0.525942	0.52284	0.0853678	0.0126777	0.152889	0.0144572	0.674556	-0.0782043	0.135357	-0.0748189	0.118343
X7894_155	Fibroblast growth factor 3	FGF-3	FGF3	0	0	0.515096	0.520499	0.522829	0.0248342	0.469106	0.887952	-0.000453061	0.989502	-0.0700693	0.181039	-0.0565807	0.23786
X21883_17	Bone morphogenetic protein 5	BMP-5	BMP5	0	0.00453564	0.513282	0.522174	0.522814	-0.0291751	0.395033	0.924349	-0.0121861	0.723387	0.012679	0.808979	0.0565769	0.237892
X4908_6	Endoglin	Endoglin	ENG	0	0	0.531283	0.525629	0.522807	-0.0626302	0.067666	0.558665	-0.0506519	0.141012	0.204642	8.03e-05	0.204942	1.57545e-05
X14309_8	Heterogeneous nuclear ribonucleoprotein H	HNRH1	HNRNPH1	0	0	0.50898	0.517427	0.522773	-0.00847049	0.804996	0.536599	0.15009	1.17e-05	-0.0633307	0.226795	-0.105397	0.0275879
X17400_71	Acyl-coenzyme A thioesterase 8	ACOT8	ACOT8	0	0	0.545731	0.547907	0.522766	-0.0775964	0.0235094	7.53605e-05	-0.0869417	0.0114113	0.170105	0.00108692	0.203755	1.76827e-05
X3860_7	Proteasome subunit alpha type-6	PSA6	PSMA6	0	0	0.50142	0.509788	0.522758	-0.00632055	0.853839	0.209311	0.0296765	0.38864	0.0156541	0.765341	0.00631143	0.895332
X10506_53	Membrane-associated progesterone receptor component 2	PGRC2	PGRMC2	0	0	0.540616	0.534951	0.522755	0.0754858	0.0275759	0.0460668	0.0623329	0.0699705	-0.168215	0.00123709	-0.198076	3.04306e-05
X15433_4	Proto-oncogene tyrosine-protein kinase Src	p60-Src	SRC	0	0	0.514373	0.532639	0.522751	-0.0263306	0.442743	0.169321	0.110761	0.00125196	-0.0419977	0.423092	-0.00464358	0.92289
X9065_28	Alpha-taxilin	TXLNA	TXLNA	0	0	0.521585	0.533994	0.522714	0.0364118	0.28841	0.858021	0.0301343	0.381361	-0.108636	0.0377678	-0.257104	5.00436e-08
X18434_141	TATA box-binding protein-like protein 1	TBPL1	TBPL1	0	0	0.543862	0.552851	0.522703	-0.0794863	0.0203195	0.0715559	0.000803993	0.981371	0.0156167	0.765885	0.196318	3.58877e-05
X20589_5	Cadherin-4	CADH4	CDH4	0	0	0.519369	0.520149	0.522695	-0.0267834	0.434935	0.382022	-0.0289261	0.400753	0.0585986	0.263489	0.0408239	0.394594
X14041_13	Granzyme B	Granzyme B	GZMB	0	0	0.516004	0.518831	0.522684	0.0247925	0.469853	0.190262	0.0664352	0.0534069	-0.094645	0.0705236	-0.13738	0.0040111
X22521_13	Homeobox protein OTX2	OTX2	OTX2	0	0	0.514873	0.532103	0.522662	0.0205514	0.549133	0.861588	0.0739075	0.0315994	-0.0972688	0.0630405	-0.137994	0.00384905
X24891_54	Epidermal growth factor receptor kinase substrate 8-like protein 2	ES8L2	EPS8L2	0	0	0.511578	0.535625	0.522658	0.00984617	0.774124	0.503907	-0.207296	1.15e-09	0.270286	1.51e-07	0.348693	6.13182e-14
X8003_57	Leucine-rich repeat LGI family member 3	LGI3	LGI3	0	0	0.505048	0.537888	0.522639	-0.00707587	0.836606	0.965556	-0.0592681	0.0849171	0.0535317	0.307088	0.0185991	0.698219
X23376_56	Actin-related protein 2/3 complex subunit 2	ARPC2	ARPC2	0	0	0.511711	0.540547	0.522624	-0.0183851	0.592027	0.83202	-0.0126773	0.712721	0.0560282	0.285044	0.0794998	0.0969596
X24430_11	Zinc finger protein 580	ZN580	ZNF580	0	0	0.534176	0.50838	0.522587	0.0755683	0.0274063	0.00921482	0.0602724	0.0797584	-0.109911	0.0355625	-0.110918	0.0203832
X6583_67	Protein Z-dependent protease inhibitor	protein Z inhibitor	SERPINA10	0	0	0.518281	0.548473	0.522583	-0.0331363	0.334013	0.443433	0.0816429	0.0175429	0.117894	0.0240952	0.0829642	0.0832113
X2891_1	B-cell receptor CD22	CD22	CD22	0	0	0.531372	0.521902	0.522572	0.0629053	0.0664662	0.0622352	0.11881	0.000534451	-0.178741	0.000591405	-0.336483	4.98788e-13
X23426_1	Variable charge X-linked protein 1	VCX1	VCX	0	0	0.520069	0.517394	0.522572	-0.0365756	0.286244	0.695163	-0.0307509	0.37169	0.102366	0.0503695	0.0918514	0.055026
X2474_54	Serum amyloid P-component	SAP	APCS	0	0	0.523356	0.535629	0.522565	-0.0455616	0.183968	0.270817	0.102386	0.00286896	0.171999	0.0009534	0.0606022	0.206089
X17403_14	Short/branched chain specific acyl-CoA dehydrogenase, mitochondrial	acyl-Coenzyme A dehydrogenase	ACADSB	0	0	0.512602	0.54507	0.522516	-0.0206882	0.546478	0.640749	-0.137599	5.93e-05	0.166004	0.001437	0.210932	8.70987e-06
X16825_20	Ataxin-3	ATX3	ATXN3	0	0	0.544339	0.543465	0.522516	0.0690199	0.0440023	0.16528	-0.269588	1.49e-15	0.178179	0.000615819	0.323814	3.98833e-12
X3029_52	CD209 antigen	DC-SIGN	CD209	0	0	0.506926	0.515398	0.522516	-0.0168241	0.623856	0.727927	-0.153209	7.6e-06	0.245478	2e-06	0.319196	8.31028e-12
X8263_64	TYMS opposite strand protein	CR056	TYMSOS	0	0	0.54946	0.550967	0.522461	-0.0772757	0.0240915	0.305694	0.0957123	0.00533337	0.0347855	0.507068	-0.0240044	0.616769
X16770_3	Lithostathine-1-beta	REG1B	REG1B	0	0	0.512946	0.542583	0.522446	-0.0209406	0.541593	0.336445	-0.105267	0.00217087	0.38551	2.05e-14	0.42016	4.04939e-20
X17468_1	Suppressor of fused homolog	SUFU	SUFU	0	0	0.536189	0.534571	0.522446	0.0619957	0.0705011	0.171437	0.000593355	0.986251	0.0615379	0.240245	-0.0947016	0.0478754
X7696_3	Next to BRCA1 gene 1 protein	NBR1	NBR1	0	0	0.528144	0.525722	0.522446	0.0461509	0.178355	0.241191	-0.0899584	0.00884526	-0.076033	0.146579	-0.0412445	0.389737
X12604_16	Polycomb protein SCMH1	SCMH1	SCMH1	0	0	0.541501	0.541682	0.522431	-0.073215	0.0326139	0.206909	-0.0739093	0.0315953	0.115378	0.0273042	0.22078	3.16657e-06
X4245_80	E3 ubiquitin-protein ligase Mdm2	MDM2	MDM2	0	0	0.512003	0.527881	0.52242	0.0152515	0.656645	0.0434035	0.0805156	0.0191692	-0.0162995	0.755967	-0.130782	0.00618359
X25103_45	Vacuolar protein sorting-associated protein 53 homolog	VPS53	VPS53	0	0	0.514367	0.508377	0.522397	0.0238906	0.486166	0.94542	-0.0517852	0.132321	-0.105789	0.0431125	-0.0583616	0.223389
X14025_18	Tumor necrosis factor receptor superfamily member 9	4-1BB	TNFRSF9	0	0	0.552978	0.538868	0.522394	0.0795182	0.0202691	0.0621362	0.0085598	0.803664	0.0697855	0.182816	-0.0252706	0.598304
X5228_25	Kinesin-like protein KIF23	KIF23	KIF23	0	0	0.547177	0.511009	0.522386	-0.0788883	0.0212854	0.245632	-0.00248142	0.942548	0.00183677	0.972064	-0.0598047	0.212131
X3874_8	Ubiquitin-conjugating enzyme E2 L3	UB2L3	UBE2L3	0	0	0.54453	0.522103	0.522356	0.0723785	0.0346582	0.621989	0.107209	0.00179212	-0.142442	0.00633943	-0.274365	5.49872e-09
X6461_54	Apolipoprotein C-III	Apo C-III	APOC3	0	0	0.517914	0.528428	0.522349	0.0331823	0.333343	0.745987	-0.00290583	0.932743	-0.0610655	0.24388	0.023811	0.619611
X22564_5	Low-density lipoprotein receptor class A domain-containing protein 3	LRAD3	LDLRAD3	0	0	0.528769	0.543186	0.522345	0.0480189	0.161401	0.645794	-0.0131443	0.702635	0.00438494	0.933373	0.0451037	0.346884
X24959_20	Cytochrome b5 reductase 4	NB5R4	CYB5R4	0	0	0.521044	0.523726	0.522345	0.0434666	0.204982	0.441032	0.0992178	0.00386813	-0.210264	5.03e-05	-0.258609	4.15366e-08
X4159_130	Complement factor H	Factor H	CFH	0	0	0.513606	0.519464	0.522345	-0.0281831	0.411308	0.51061	-0.00800187	0.816225	0.268758	1.79e-07	0.199653	2.62127e-05
X17852_5	Protein phosphatase methylesterase 1	PPME1	PPME1	0	0	0.539531	0.55246	0.522327	0.0655653	0.0557434	0.263629	-0.315395	5.4e-21	0.242533	2.67e-06	0.340036	2.73593e-13
X9934_29	Phosphatidylinositol transfer protein alpha isoform	PIPNA	PITPNA	0	-0.0388657	0.516589	0.537609	0.522319	0.026858	0.433658	0.902304	-0.294206	2.36e-18	0.193517	0.000195469	0.36394	3.92602e-15
X22033_7	Wiskott-Aldrich syndrome protein	WASP	WAS	0	0	0.524235	0.544091	0.522315	0.0464642	0.175422	0.479801	0.0326307	0.343155	-0.0759463	0.147041	-0.165053	0.000531667
X2747_3	NKG2D ligand 3	ULBP-3	ULBP3	0	0	0.561275	0.514497	0.522304	-0.116936	0.000626276	0.000317991	-0.0298105	0.386501	0.188112	0.000295928	0.150101	0.00165153
X13465_5	Calcipressin-1	CCP1	RCAN1	0	0	0.501883	0.528715	0.522286	0.00150027	0.965122	0.381614	-0.0137226	0.690214	0.0131121	0.802586	0.0391239	0.414594
X2642_4	Platelet-activating factor acetylhydrolase IB subunit beta	PAFAH beta subunit	PAFAH1B2	0	0	0.523529	0.516277	0.522256	0.0410392	0.231446	0.838316	-0.24473	5.29e-13	0.305166	2.51e-09	0.371763	9.04176e-16
X25112_6	Ribosomal protein S6 kinase beta-2	KS6B2	RPS6KB2	0	0	0.507751	0.526314	0.522252	-0.0215921	0.529086	0.426456	-0.0358742	0.297304	-0.0064875	0.901561	-0.0333119	0.487326
X3324_51	T-lymphocyte surface antigen Ly-9	LY9	LY9	0	0	0.50506	0.525956	0.522248	-0.0125119	0.715344	0.482897	0.0714722	0.0376698	0.0944772	0.0710259	0.0112218	0.815045
X5128_53	SLAM family member 6	SLAF6	SLAMF6	0	0	0.504626	0.538905	0.522245	-0.00857571	0.802623	0.154345	0.00799783	0.816317	0.0900904	0.0852262	0.122554	0.0103395
X11544_39	PHD finger protein 3	PHF3	PHF3	0	0	0.529833	0.515573	0.52223	0.0509748	0.137097	0.36638	0.187771	3.75e-08	-0.20807	6.05e-05	-0.299368	1.68836e-10
X19195_85	40S ribosomal protein S5	RS5	RPS5	0	0	0.540419	0.526727	0.522219	-0.0698058	0.0416441	0.0986922	0.086569	0.0117702	-0.0114673	0.826931	-0.000769497	0.987203
X23256_21	TLD domain-containing protein 2	TLDC2	TLDC2	0	0	0.504993	0.516813	0.522204	0.0031778	0.926205	0.985017	0.0553376	0.107746	-0.0797694	0.127687	-0.109262	0.02235
X17702_53	UDP-glucuronosyltransferase 1-1	UGT 1A1	UGT1A1	0	0	0.55787	0.561123	0.522185	-0.0989317	0.00384538	0.00214597	-0.074645	0.0299349	0.161595	0.0019265	0.217389	4.5104e-06
X17341_89	Acetyl-CoA acetyltransferase, cytosolic	THIC	ACAT2	0	0	0.501944	0.53491	0.52217	-0.0101555	0.767229	0.800004	-0.0393075	0.253432	0.0499074	0.34104	0.104081	0.029596
X11486_26	Zinc finger protein 174	ZN174	ZNF174	0	0	0.519522	0.525688	0.522163	-0.0315707	0.357366	0.536456	-0.00550358	0.873005	0.0519165	0.321934	0.118508	0.0131754
X5658_64	Coagulation factor XIII B chain	coagulation factor XIII B	F13B	0	0	0.507944	0.52863	0.522152	-0.0169203	0.621874	0.289994	0.0377816	0.272341	0.188021	0.00029796	0.162339	0.000657932
X2649_77	Intercellular adhesion molecule 3	sICAM-3	ICAM3	0	0	0.543269	0.517986	0.522137	0.0739411	0.0309235	0.0916245	0.134457	8.75e-05	-0.150263	0.00396101	-0.317438	1.09537e-11
X15413_3	Phosphatidylcholine-sterol acyltransferase	LCAT	LCAT	0	0	0.502766	0.526087	0.522129	-0.000490194	0.988601	0.21568	-0.00462955	0.893041	-0.0298328	0.569417	-0.124388	0.00924268
X21829_8	40S ribosomal protein S12	RS12	RPS12	0	0	0.527122	0.50424	0.522129	-0.042793	0.212095	0.540928	0.040244	0.24229	-0.0197835	0.706008	0.0181601	0.705006
X22078_4	Tyrosine aminotransferase	ATTY	TAT	0	0	0.508558	0.532922	0.522126	0.01815	0.596772	0.482537	-0.124483	0.000283989	-0.0280214	0.593098	0.0407985	0.394888
X21544_4	Atlastin-3	ATLA3	ATL3	0	0	0.526312	0.53523	0.522096	-0.0533183	0.119914	0.131186	0.0522784	0.12867	0.101163	0.0531503	0.0286936	0.549685
X2811_27	Angiopoietin-1	Angiopoietin-1	ANGPT1	0	0	0.512567	0.522516	0.522096	0.0199959	0.559986	0.714981	-0.207193	1.17e-09	0.310889	1.21e-09	0.464908	8.09934e-25
X21338_44	Nucleotide exchange factor SIL1	SIL1	SIL1	0	0	0.516936	0.506333	0.522096	0.0308201	0.368917	0.402178	-0.107268	0.00178161	0.0403256	0.441806	-0.0185545	0.698907
X5441_67	Troponin I, cardiac muscle	Troponin I	TNNI3	0	0	0.509972	0.518246	0.522062	0.011783	0.731266	0.347519	0.00961627	0.78002	0.054488	0.298515	0.016412	0.732256
X4129_72	Complement factor B	Factor B	CFB	0	0	0.523931	0.549523	0.522051	-0.0471087	0.169503	0.304917	0.0915175	0.00773229	0.14587	0.00517261	0.126399	0.00816042
X8323_163	Trefoil factor 3	TFF3	TFF3	0	0	0.50988	0.548469	0.522047	-0.0300362	0.381227	0.337787	-0.159021	3.35e-06	0.403625	8.98e-16	0.39931	3.70469e-18
X24422_36	Spermatogenesis-associated protein 24	SPA24	SPATA24	0	0	0.592057	0.568324	0.522018	-0.161814	2.05848e-06	8.51259e-05	0.0922017	0.00728474	-0.0117074	0.823366	0.00306698	0.949026
X12477_42	Translin	TSN	TSN	0	0	0.533319	0.541157	0.521973	0.0580807	0.0902158	0.453237	-0.130485	0.000141244	0.00294896	0.955163	0.0957072	0.0455459
X12635_9	tRNA (cytosine(38)-C(5))-methyltransferase	TRDMT	TRDMT1	0	0	0.504857	0.51532	0.521969	-0.0167777	0.624813	0.530722	-0.0464027	0.177528	0.167517	0.0012973	0.188613	7.27067e-05
X25078_13	Cysteine protease ATG4C	ATG4C	ATG4C	0	0	0.511193	0.515052	0.521969	-0.027411	0.424247	0.200838	0.0877964	0.0106245	-0.0646056	0.217562	-0.056851	0.235622
X17372_5	Eukaryotic translation initiation factor 4E-binding protein 1	4EBP1	EIF4EBP1	0	0	0.507369	0.52535	0.521951	-0.01121	0.743864	0.596277	0.0301827	0.380596	0.0208852	0.690458	-0.0389644	0.4165
X8853_2	C-type lectin domain family 4 member A	CLC4A	CLEC4A	0	0	0.536424	0.52389	0.521921	-0.0641521	0.0612459	0.0173263	0.00374679	0.913346	0.125254	0.0165075	0.126768	0.00797457
X21351_8	Glycyl t-RNA synthetase	Glycyl t-RNA synthetase	GARS1	0	-0.0214538	0.538964	0.607173	0.521839	0.0652674	0.0568676	0.43578	-0.386233	1.74e-31	0.268583	1.82e-07	0.474659	6.15302e-26
X6227_1	Kallikrein-10	kallikrein 10	KLK10	0	0	0.501603	0.507275	0.521839	-0.0142826	0.677187	0.281766	-0.0306459	0.373326	0.117026	0.0251638	0.18096	0.000142666
X20435_41	ER membrane protein complex subunit 2	EMC2	EMC2	0	0	0.522332	0.559657	0.521817	-0.0277713	0.418179	0.0706694	0.0110515	0.748226	0.056654	0.27969	0.146967	0.00206845
X13977_28	BRCA1-associated RING domain protein 1	BARD1	BARD1	0	0	0.504528	0.509981	0.521817	-0.00635389	0.853077	0.92046	-0.0149233	0.664693	-0.00378151	0.942524	0.0605872	0.206201
X23286_2	RING finger protein 141	RN141	RNF141	0	0	0.52385	0.533994	0.521813	-0.0471474	0.169152	0.312513	0.123273	0.000325715	0.0315053	0.54796	-0.030978	0.518357
X7187_3	Protein phosphatase 1L	PPM1L	PPM1L	0	0	0.544151	0.533603	0.521813	0.0707968	0.0388237	0.252824	0.00228946	0.946985	-0.0497727	0.342347	-0.0761537	0.111901
X20127_102	Hephaestin	HEPH	HEPH	0	0	0.52396	0.525242	0.521813	-0.0321028	0.349317	0.240387	0.038408	0.264466	-0.0542334	0.300782	-0.091821	0.0551071
X12954_71	Peroxisome proliferator-activated receptor alpha	PPARa	PPARA	0	0	0.544044	0.521504	0.521802	-0.0829146	0.0154858	0.131375	0.0742724	0.0307662	-0.0656954	0.209885	-0.0965368	0.0436965
X11283_13	DDB1- and CUL4-associated factor 5	DCAF5	DCAF5	0	0	0.525366	0.53373	0.521794	-0.0449266	0.190162	0.282498	-0.0176221	0.608763	0.0520003	0.321152	0.011851	0.804878
X8786_6	Protein FAM171B:Extracellular domain	F171B:ECD	FAM171B	0	-0.0388657	0.537043	0.505514	0.521787	-0.0634172	0.0642803	0.535079	-0.0860961	0.01224	0.00656643	0.900369	0.119137	0.0126938
X2960_66	Properdin	Properdin	CFP	0	0	0.505184	0.539165	0.521761	-0.011201	0.744064	0.830856	0.0143932	0.675915	0.23962	3.55e-06	0.19245	5.13345e-05
X24055_44	Cleavage stimulation factor 50 kDa subunit	CSTF1	CSTF1	0	0	0.500312	0.509024	0.521761	0.00652147	0.849248	0.178898	0.096442	0.00499246	-0.0890604	0.0888718	-0.13286	0.00540644
X8307_47	UPF0696 protein C11orf68	CK068	C11orf68	0	-0.0158848	0.522977	0.541649	0.521749	0.0367744	0.283631	0.836496	-0.273865	5.09e-16	0.221	1.99e-05	0.284572	1.38249e-09
X3403_1	Tryptase beta-2	TPSB2	TPSB2	0	0	0.511659	0.540562	0.521749	-0.029517	0.389516	0.692964	-0.017828	0.604583	0.104911	0.044885	0.0833753	0.08169
X22844_4	Zinc finger SWIM domain-containing protein 7	ZSWM7	ZSWIM7	0	0	0.506865	0.504952	0.521727	0.00251083	0.941662	0.408557	-0.0407857	0.236003	0.120411	0.0212171	0.222455	2.65347e-06
X12715_30	mRNA-decapping enzyme 1B	DCP1B	DCP1B	0	0	0.521776	0.513957	0.521723	0.0352682	0.30383	0.88117	0.0633434	0.0655431	-0.0567139	0.279182	-0.0198451	0.679089
X17365_7	Kynurenine--oxoglutarate transaminase 1	KAT1	KYAT1	0	0	0.500419	0.513931	0.521716	0.00465058	0.892179	0.37604	-0.105281	0.00216798	0.125245	0.016515	0.142293	0.00287087
X17751_68	Beta-crystallin B1	CRBB1	CRYBB1	0	0	0.508075	0.526764	0.521712	0.0158599	0.643878	0.666547	-0.0711443	0.0385581	0.0921425	0.0783219	0.026842	0.575743
X22392_5	SERTA domain-containing protein 3	SRTD3	SERTAD3	0	0	0.519323	0.540826	0.521694	-0.0313041	0.361443	0.846421	0.00662243	0.847478	0.0237035	0.651279	0.134917	0.0047248
X3218_8	Glutamate carboxypeptidase 2	PSMA	FOLH1	0	0	0.520492	0.535312	0.521682	-0.0311216	0.36425	0.0863059	-0.00328787	0.923926	0.0442325	0.398817	-0.0786603	0.10055
X19144_9	Transcription factor 4	ITF2	TCF4	0	0	0.513195	0.524013	0.521679	0.0231912	0.499024	0.151709	0.157272	4.3e-06	-0.108445	0.0381072	-0.293412	3.99416e-10
X19575_4	Erythropoietin receptor	EPO-R	EPOR	0	0	0.526049	0.503135	0.521675	0.0543689	0.112781	0.408487	0.0397696	0.247891	-0.0216786	0.679339	-0.0565652	0.237989
X4984_83	S-formylglutathione hydrolase	Esterase D	ESD	0	0	0.538987	0.55185	0.521638	0.0696236	0.0421812	0.272743	-0.155442	5.57e-06	-0.0861147	0.0999918	0.0346538	0.469948
X20237_38	Ornithine aminotransferase, mitochondrial	OAT	OAT	0	0	0.515976	0.531012	0.521627	0.0323426	0.345727	0.721681	-0.12882	0.000171958	-0.0879094	0.0930926	0.0650932	0.174372
X4284_18	RNA-binding protein 39	RBM39	RBM39	0	0	0.55224	0.518913	0.521627	0.0900489	0.00854036	0.0902863	0.141181	3.77e-05	-0.18563	0.000356658	-0.367866	1.88823e-15
X7875_86	Pleckstrin	PLEK	PLEK	0	0	0.536603	0.513745	0.521601	-0.0729714	0.0331982	0.208661	-0.0100035	0.771403	0.140727	0.00700736	0.151511	0.00149039
X2970_60	Amphiregulin	AREG	AREG	0	0	0.523364	0.531671	0.521586	0.0290578	0.396937	0.367288	0.00368778	0.914706	-0.0484675	0.355169	-0.0210088	0.661408
X6577_64	Laminin subunit alpha-4	LAMA4	LAMA4	0	0	0.520173	0.535189	0.521582	-0.0339709	0.321975	0.872764	0.00660317	0.847916	0.0216065	0.680346	0.0810127	0.0907483
X21957_12	Phosphoinositide 3-kinase adapter protein 1	BCAP	PIK3AP1	0	0	0.533039	0.528525	0.521578	0.0582785	0.0891234	0.613624	0.00934756	0.786016	-0.122549	0.0190104	-0.0547529	0.253386
X19562_8	Ubiquitin carboxyl-terminal hydrolase 28	UBP28	USP28	0	0	0.520937	0.500648	0.521578	0.0354874	0.300833	0.384711	-0.0119501	0.728532	-0.0576518	0.271294	-0.186047	9.14207e-05
X9786_310	Radiation-inducible immediate-early gene IEX-1	IEX1	IER3	0	0	0.52048	0.50672	0.52156	0.0395282	0.249097	0.71721	0.135915	7.31e-05	-0.129156	0.0134057	-0.287324	9.43599e-10
X19295_32	Serine/threonine-protein phosphatase PP1-gamma catalytic subunit	PP1G	PPP1CC	0	0	0.510554	0.521321	0.521552	0.0161138	0.638578	0.256633	-0.0750078	0.0291442	-0.137949	0.0082238	-0.131041	0.00608154
X23181_2	Leukocyte tyrosine kinase receptor	LTK	LTK	0	0	0.560413	0.509706	0.521526	0.115094	0.000763356	0.00116336	0.0744922	0.0302736	-0.190467	0.000247348	-0.216234	5.08112e-06
X23386_38	T-complex protein 10A homolog 2	TCP2L	None	0	0	0.527169	0.53007	0.521519	-0.0489493	0.153424	0.0787685	-0.069072	0.0445943	0.20773	6.22e-05	0.269976	9.78686e-09
X12646_2	Ribulose-phosphate 3-epimerase	RPE	RPE	0	0	0.507155	0.53093	0.5215	0.00804442	0.814622	0.277249	-0.124386	0.000287113	0.16128	0.00196683	0.0772799	0.106682
X24023_35	soluble Endothelial protein C receptor	sEPCR	PROCR	0	0	0.555078	0.529981	0.521485	-0.101981	0.0028813	0.00906879	-0.0548919	0.110616	0.176743	0.000682526	0.108912	0.0227851
X12530_14	Cyclin-dependent kinases regulatory subunit 1	CKS-1	CKS1B	0	0	0.525375	0.511329	0.52147	0.0479571	0.161941	0.391001	0.134953	8.23e-05	-0.123137	0.0184396	-0.211997	7.8248e-06
X19236_24	Activated RNA polymerase II transcriptional coactivator p15	TCP4	SUB1	0	0	0.509709	0.543923	0.52144	-0.0203084	0.553869	0.507885	0.139658	4.58e-05	-0.0817174	0.118616	-0.12668	0.00801858
X2888_49	Complement component C7	C7	C7	0	0	0.510051	0.526012	0.521418	-0.0291658	0.395185	0.58173	-0.127322	0.000204861	0.386904	1.62e-14	0.426403	9.83981e-21
X23520_60	Beta-lactamase-like protein FLJ75971	YE006	MBLAC2	0	0	0.549486	0.521813	0.521418	-0.0809648	0.0180936	0.126383	-0.0804564	0.0192581	0.069627	0.183815	0.229588	1.23068e-06
X5106_52	Neurogenic locus notch homolog protein 2	NOTC2	NOTCH2	0	0	0.523648	0.524575	0.521411	0.0374199	0.27526	0.214758	-0.00876509	0.799055	-0.0159846	0.760536	-0.142659	0.00279902
X25066_32	Glycogenin-2	GLYG2	GYG2	0	0	0.510646	0.544791	0.521392	-0.0221289	0.518894	0.505106	-0.00662383	0.847446	0.0235267	0.65371	0.061688	0.198063
X19317_114	Prostatic acid phosphatase	Prostatic acid phosphatase	ACP3	0	0	0.536366	0.527356	0.521392	0.0590718	0.0848482	0.599256	-0.0900106	0.00880576	0.144991	0.00545162	0.107907	0.0240781
X3184_25	Coagulation factor VII	Coagulation Factor VII	F7	0	0	0.526472	0.536198	0.521385	-0.0535624	0.118227	0.384954	0.0249813	0.468056	0.283841	3.28e-08	0.156886	0.000999635
X8687_26	Transmembrane protein 106B	T106B	TMEM106B	0	0.00453564	0.552712	0.524047	0.521385	-0.0995749	0.00362052	0.0239247	-0.0870534	0.0113056	0.0643124	0.219661	0.127219	0.00775245
X17366_6	DCN1-like protein 1	DCNL1	DCUN1D1	0	0	0.566329	0.517297	0.521359	-0.106989	0.00176411	0.00281347	-0.0234999	0.494858	0.0700611	0.18109	0.154305	0.00121289
X7921_65	Four-jointed box protein 1	FJX1	FJX1	0	0	0.543303	0.515625	0.521344	-0.0757005	0.0271364	0.341098	-0.0252125	0.463945	0.0217392	0.678492	0.146496	0.00213893
X21740_26	Ubiquitin carboxyl-terminal hydrolase 1	UBP1	USP1	0	0	0.529666	0.50478	0.521344	-0.0518301	0.130619	0.0522371	-0.0149017	0.665148	0.0260925	0.618798	0.136045	0.00438482
X24441_7	Nuclear cap-binding protein subunit 1	NCBP1	NCBP1	0	0	0.555937	0.518362	0.52134	-0.0996276	0.00360261	0.00524641	-0.0510452	0.137948	0.095417	0.06825	0.172819	0.000283752
X11149_3	Toll-like receptor 1:Cytoplasmic domain	TLR1:CD	TLR1	0	0	0.509729	0.53121	0.521333	-0.0136207	0.69136	0.993101	0.00425929	0.90155	0.075715	0.14828	0.0897235	0.0609251
X18214_2	Glutamate--cysteine ligase regulatory subunit	GSH0	GCLM	0	0	0.590041	0.541786	0.521325	-0.161686	2.09766e-06	2.15626e-06	-0.0349531	0.309889	0.168303	0.00122969	0.196666	3.47405e-05
X16809_1	Nucleoside diphosphate kinase, mitochondrial	NDKM	NME4	0	0	0.517766	0.52411	0.521292	0.0345449	0.313861	0.447033	0.104454	0.00235012	-0.10826	0.0384393	-0.209296	1.02585e-05
X14107_1	5-formyltetrahydrofolate cyclo-ligase	MTHFS	MTHFS	0	0	0.51511	0.53437	0.521284	-0.0315652	0.357451	0.586891	0.0759969	0.0270787	0.0626812	0.231604	0.00670674	0.888817
X7939_1	Putative uncharacterized protein PQLC2L	CC055	SLC66A1L	0	0	0.529151	0.545692	0.521277	-0.044265	0.196777	0.166005	-0.0201852	0.557674	-0.036428	0.487208	0.1758	0.000221375
X10351_51	Interferon regulatory factor 1	IRF1	IRF1	0.00771988	0	0.564223	0.50338	0.521273	-0.113426	0.000911018	0.0245288	0.0715491	0.0374638	-0.0563741	0.282077	-0.0126927	0.791328
X8000_17	Killer cell immunoglobulin-like receptor 2DL5A	KI2LA	KIR2DL5A	0	0	0.505757	0.538443	0.521232	-0.014543	0.671642	0.71729	0.0264362	0.442532	0.030852	0.556294	0.0309639	0.518546
X13548_53	Phosphatidate phosphatase PPAPDC1A	PPC1A	PLPP4	0	0	0.509877	0.529121	0.521232	0.0243732	0.4774	0.666421	-0.00380639	0.911973	-0.0284443	0.587529	-0.0371931	0.438017
X11657_86	Suppressor of cytokine signaling 7	SOCS7	SOCS7	0	0	0.546023	0.500331	0.521146	0.0751851	0.028202	0.12512	-0.0334315	0.331437	0.0441947	0.399221	0.135617	0.00451106
X20444_12	Tubulin polymerization-promoting protein family member 3	TPPP3	TPPP3	0	0	0.5152	0.535066	0.521135	0.0275074	0.422618	0.750682	-0.290708	6.13e-18	0.225314	1.35e-05	0.385363	6.39347e-17
X9090_9	Synaptotagmin-like protein 4:Ca2+-dependent membrane-targeting module 1	SYTL4:C2 1	SYTL4	0	0	0.51419	0.501493	0.521117	-0.0238026	0.487773	0.93118	0.16308	1.86e-06	-0.0824486	0.115344	-0.0931733	0.0516065
X2991_9	Interleukin-1 receptor type 1	IL-1 sRI	IL1R1	0	0	0.527606	0.526172	0.521109	-0.0569232	0.096826	0.284745	-0.108013	0.00165393	0.276824	7.31e-08	0.41177	2.58969e-19
X23645_49	2-hydroxyacyl-CoA lyase 1	HACL1	HACL1	0	0	0.543248	0.538964	0.521098	-0.0643905	0.0602871	0.0297623	0.0852118	0.0131632	-0.0752291	0.150908	-0.0387763	0.418755
X25889_108	Absent in melanoma 2	AIM2	AIM2	0	0	0.501279	0.526269	0.521072	-0.00108293	0.97482	0.897595	-0.180455	1.26e-07	0.198665	0.000130305	0.255898	5.80555e-08
X9282_12	Cysteine-rich secretory protein 2	CRIS2	CRISP2	0	0	0.517399	0.511325	0.521072	0.0234323	0.494572	0.508552	-0.0159217	0.643763	0.0781808	0.135475	0.0350505	0.464876
X18932_84	Nicotinamide/nicotinic acid mononucleotide adenylyltransferase 1	NMNA1	NMNAT1	0	0	0.547064	0.520003	0.52105	0.0865436	0.0114989	0.0551176	0.163463	1.76e-06	-0.224929	1.4e-05	-0.321738	5.55632e-12
X8459_10	Bone morphogenetic protein 6	BMP-6	BMP6	0	0.00294911	0.508778	0.526969	0.521038	-0.0228656	0.505071	0.850684	-0.0227713	0.508335	0.0101552	0.846472	0.0519826	0.278235
X13604_27	E3 ubiquitin-protein ligase NEURL1	NEUL1	NEURL1	0	0	0.515724	0.542739	0.521035	-0.0328101	0.338797	0.545394	-0.0912633	0.00790475	0.213372	3.86e-05	0.266694	1.49611e-08
X22527_4	PDZ and LIM domain protein 3	PDLI3	PDLIM3	0	0	0.522083	0.527118	0.521035	0.0347703	0.310712	0.885437	-0.293844	2.6e-18	0.363515	7.09e-13	0.511709	1.55796e-30
X8372_29	Cadherin-related family member 1	CDHR1	CDHR1	0	0	0.511862	0.516351	0.521031	0.0150164	0.661606	0.290011	0.0573837	0.095321	-0.0860238	0.100352	-0.124026	0.00945033
X21106_206	Centrin-1	CETN1	CETN1	0	0	0.515761	0.513149	0.521005	0.0383457	0.263549	0.377205	0.0770547	0.0250106	-0.0947268	0.0702799	-0.129042	0.00691039
X25115_21	FH1/FH2 domain-containing protein 1	FHOD1	FHOD1	0	0	0.53461	0.541909	0.520964	-0.0514285	0.133631	0.508846	0.0616783	0.0729672	-0.0430199	0.411883	-0.0434484	0.364886
X16913_8	Ribonuclease T2	RNT2	RNASET2	0	0	0.508008	0.511671	0.520964	0.00327421	0.923973	0.39412	-0.125775	0.000244971	0.15997	0.00214251	0.218896	3.85684e-06
X7856_51	Protein FAM151A	F151A	FAM151A	0	0	0.519823	0.524784	0.520957	0.0382209	0.265107	0.562268	0.0355981	0.30104	-0.0531827	0.310257	-0.0988372	0.0388957
X21117_18	Zinc finger C4H2 domain-containing protein	ZC4H2	ZC4H2	0	0	0.518883	0.525175	0.520938	-0.0369271	0.281637	0.332247	-0.0266773	0.438382	0.00533225	0.919024	0.0862359	0.0717162
X9794_17	AarF domain-containing protein kinase 4	ADCK4	COQ8B	0	0	0.502824	0.534095	0.520916	-0.00353865	0.917853	0.404778	0.0359484	0.296305	-0.0785166	0.133799	0.0734918	0.125033
X24647_3	C->U-editing enzyme APOBEC-2	ABEC2	APOBEC2	0	0	0.526301	0.525245	0.520901	-0.0453489	0.186025	0.164842	0.0294747	0.391875	0.226561	1.21e-05	0.185086	9.95287e-05
X19291_2	Calsequestrin-2	CASQ2	CASQ2	0	0	0.50664	0.521295	0.520878	0.00743517	0.828435	0.361057	-0.0976058	0.00448936	0.00101776	0.984519	0.117604	0.0138955
X15414_316	L-lactate dehydrogenase A chain	LDHA	LDHA	0	0	0.505103	0.562482	0.520875	0.00182342	0.957616	0.832505	-0.0491693	0.153036	0.00482918	0.926641	0.0186256	0.697811
X12524_18	Diamine acetyltransferase 2	SAT2	SAT2	0	0	0.528728	0.517997	0.520875	-0.0482155	0.159689	0.61643	-0.0455609	0.185531	0.113865	0.0294064	0.190241	6.27767e-05
X3420_21	Carbonic anhydrase 13	Carbonic anhydrase XIII	CA13	0	0	0.532984	0.530699	0.520871	0.0484651	0.157537	0.635688	0.120148	0.000461517	-0.0554896	0.289708	-0.265969	1.64177e-08
X5095_21	Killer cell immunoglobulin-like receptor 2DL4	KI2L4	KIR2DL4	0	0	0.521773	0.548931	0.520849	0.0321043	0.349294	0.208679	0.0132277	0.700838	-0.029346	0.575737	-0.0389769	0.416351
X6226_69	Calcium uptake protein 2, mitochondrial	EFHA1	MICU2	0	0	0.589051	0.553149	0.520841	0.162918	1.74942e-06	3.0246e-05	0.00822574	0.811179	-0.0852362	0.103514	-0.260994	3.08448e-08
X14028_22	Phosphatidylinositol 4-phosphate 3-kinase C2 domain-containing subunit alpha	P3C2A	PIK3C2A	0	0	0.537095	0.542535	0.520834	-0.0646866	0.0591139	7.54214e-24	-0.01035	0.763717	0.197459	0.000143417	0.221152	3.04508e-06
X6441_62	A disintegrin and metalloproteinase with thrombospondin motifs 6	ATS6	ADAMTS6	0	0	0.502584	0.50656	0.520834	-0.000947807	0.977961	0.859973	0.0721726	0.0358299	-0.0790922	0.130964	-0.202933	1.91453e-05
X12008_3	T-cell antigen CD7	CD7	CD7	0	0	0.51128	0.541425	0.520822	-0.024362	0.477601	0.410485	-0.0685392	0.0462687	0.0938109	0.0730492	0.242643	2.82514e-07
X5254_69	cGMP-inhibited 3',5'-cyclic phosphodiesterase A	PDE3A	PDE3A	0	0	0.523127	0.51605	0.520815	-0.0421121	0.219466	0.776918	-0.0434016	0.207269	0.108383	0.0382182	0.121193	0.0112264
X21722_21	Polypeptide N-acetylgalactosaminyltransferase 4	GALT4	GALNT4	0	0	0.535536	0.502945	0.520815	-0.0638644	0.0624191	0.370735	-0.129667	0.00015564	0.289713	1.65e-08	0.305478	6.83707e-11
X5879_51	Dynactin subunit 2	Dynactin subunit 2	DCTN2	0	0	0.5044	0.520837	0.5208	0.00453268	0.894897	0.3995	-0.0201997	0.557391	0.145678	0.00523248	0.189636	6.63066e-05
X21769_10	Xylulose kinase	XYLB	XYLB	0	0	0.505303	0.519531	0.520789	0.00656557	0.848241	0.821551	0.0591618	0.0854784	-0.0203708	0.697702	-0.00697082	0.884469
X14076_74	Cystatin-S	Cystatin-S	CST4	0	0	0.513305	0.532222	0.520778	-0.0223055	0.515562	0.832758	-0.0896218	0.00910351	0.0736525	0.159681	0.142877	0.00275702
X20203_45	Complement C1s subcomponent	C1s	C1S	0	0	0.512414	0.513849	0.520774	-0.0263323	0.442713	0.632757	-0.160492	2.71e-06	0.329523	1.02e-10	0.435984	1.05868e-21
X13056_18	Orphan sodium- and chloride-dependent neurotransmitter transporter NTT5	S6A16	SLC6A16	0	0	0.512906	0.519642	0.520767	-0.0212381	0.535864	0.601117	0.00277863	0.935681	-0.0656454	0.210233	0.116654	0.0146893
X3845_51	Dynein light chain roadblock-type 1	DLRB1	DYNLRB1	0	0	0.5414	0.518846	0.520767	-0.0730534	0.0330005	0.300459	0.0991097	0.00390722	-0.0703473	0.17931	-0.127327	0.00770015
X25947_116	Phosphatidylinositol 3-kinase catalytic subunit type 3	PK3C3	PIK3C3	0	0	0.525994	0.508395	0.520763	0.0487504	0.155104	0.461625	0.183473	7.69e-08	-0.195124	0.00017241	-0.270045	9.69966e-09
X2915_6	Proliferating cell nuclear antigen	PCNA	PCNA	0	0	0.514841	0.517431	0.520722	-0.0296324	0.387665	0.468604	0.065409	0.0572085	0.051052	0.330068	-0.0677614	0.157336
X23543_92	Probable tRNA pseudouridine synthase 1	TRUB1	TRUB1	0	0	0.515738	0.537561	0.520692	-0.0302879	0.377248	0.0173183	-0.0783249	0.0227088	0.0597594	0.254131	0.0708055	0.139468
X9952_57	Transcription factor A, mitochondrial	TFAM	TFAM	0	0	0.513707	0.552993	0.520677	-0.0188974	0.581746	0.656418	0.115952	0.000727457	-0.131842	0.01158	-0.21489	5.83288e-06
X11275_94	Low-density lipoprotein receptor-related protein 1B	LRP1B	LRP1B	0	0	0.522413	0.531693	0.520674	0.0420508	0.220137	0.211943	0.0642884	0.0616135	-0.199794	0.000119049	-0.206971	1.29142e-05
X11120_49	N-acetyltransferase 14	NAT14	NAT14	0	0	0.512203	0.511143	0.520674	0.0268359	0.434036	0.154707	0.00284059	0.93425	-0.0369988	0.480407	-0.0595607	0.214006
X21996_28	NEDD8 ultimate buster 1	NUB1	NUB1	0	0	0.5465	0.527408	0.52067	0.0794398	0.0203932	0.105657	-0.0101473	0.768211	0.000739391	0.988753	-0.0459296	0.338117
X5260_80	Non-receptor tyrosine-protein kinase TYK2	TYK2	TYK2	0	0	0.54116	0.555792	0.520629	0.0739906	0.0308111	0.0840868	-0.209078	8.24e-10	0.0491599	0.348329	0.164373	0.000561035
X12475_48	Chloride intracellular channel protein 5	CLIC5	CLIC5	0	0	0.51783	0.520484	0.520614	-0.0288843	0.399763	0.560716	0.0457634	0.183582	0.0363206	0.488495	0.0945958	0.0481261
X5715_4	Protein ABHD14A	ABHEA	ABHD14A	0	0	0.50484	0.526429	0.520588	-0.0194516	0.570719	0.406724	-0.113282	0.000964489	0.277902	6.47e-08	0.223393	2.40185e-06
X25473_62	Protein farnesyltransferase/geranylgeranyltransferase type-1 subunit alpha	FNTA	FNTA	0	0	0.530114	0.537952	0.52058	0.0483974	0.158119	0.206378	-0.0138355	0.687798	0.161135	0.00198561	0.0146816	0.759566
X2966_65	Stem cell growth factor-beta	SCGF-beta	CLEC11A	0	0	0.524342	0.514594	0.52058	-0.0482148	0.159696	0.253106	-0.0740991	0.0311597	0.111463	0.0330261	0.184417	0.00010557
X6372_7	Y-box-binding protein 2	YBOX2	YBX2	0	0	0.508425	0.540461	0.520573	-0.0177855	0.604164	0.65785	0.139708	4.55e-05	-0.0147477	0.778565	-0.170877	0.000332828
X20074_3	Laminin subunit alpha-3	LAMA3	LAMA3	0	0	0.582698	0.527632	0.520573	0.146863	1.67859e-05	0.000226781	-0.177318	2.09e-07	0.0685604	0.190639	0.083398	0.0816068
X23623_48	Diphosphoinositol polyphosphate phosphohydrolase 3-beta	NUD11	NUDT11	0	0	0.527961	0.541422	0.520554	-0.0460827	0.178997	0.747964	0.0440784	0.200266	0.0558322	0.286735	-0.0341359	0.476614
X4929_55	Sex hormone-binding globulin	SHBG	SHBG	0	0	0.510887	0.522003	0.52054	-0.0222979	0.515705	0.601513	-0.107553	0.00173168	0.24573	1.95e-06	0.286845	1.00875e-09
X3472_40	Baculoviral IAP repeat-containing protein 5	Survivin	BIRC5	0	0	0.517014	0.529981	0.520521	-0.0216593	0.527805	0.291609	0.0736208	0.0322676	-0.0669373	0.201377	-0.0564505	0.238944
X18244_1	Annexin A7	ANXA7	ANXA7	0.00862667	0	0.544556	0.527062	0.520495	-0.0913617	0.00762075	0.00150303	-0.0107374	0.75515	0.208954	5.62e-05	0.214102	6.32095e-06
X21389_32	Serine/threonine-protein kinase 3	STK3	STK3	0	0	0.540549	0.512766	0.520495	-0.0723931	0.0346217	0.557907	-0.0883548	0.0101368	0.134498	0.00999459	0.181796	0.000132714
X21156_5	Putative glutathione-specific gamma-glutamylcyclotransferase 2	CHAC2	CHAC2	0	0	0.500318	0.523592	0.520465	-0.00455982	0.894271	0.659066	-0.0497216	0.148468	0.0552981	0.291378	0.214817	5.87642e-06
X2833_20	Kallikrein-4	Kallikrein 4	KLK4	0	0	0.513884	0.515945	0.520439	0.0182906	0.593933	0.762072	0.0384694	0.263702	-0.109423	0.0363932	-0.0815388	0.0886646
X8236_8	UPF0729 protein C18orf32	CR032	C18orf32	0	0	0.519528	0.522256	0.52042	-0.0329443	0.336823	0.914691	0.0165121	0.631514	0.0384524	0.463319	-0.0391747	0.413987
X21985_61	Integrin beta-1-binding protein 2	ITBP2	ITGB1BP2	0	0	0.507441	0.513086	0.520379	0.0107024	0.755084	0.76674	-0.05411	0.115795	0.150832	0.00382456	0.149113	0.00177382
X20543_19	Beta-defensin 127	DB127	DEFB127	0	0	0.505179	0.518362	0.520361	0.000610526	0.985803	0.311651	-0.015979	0.64257	0.0104179	0.842552	0.101102	0.0346134
X18171_25	C-X-C motif chemokine 11	I-TAC	CXCL11	0	0	0.505358	0.503809	0.520309	0.00621367	0.856284	0.658125	-0.0334801	0.330733	0.0541276	0.301727	-0.106446	0.0260712
X10037_98	Sialic acid-binding Ig-like lectin 12:Ig-like V-type 2 domain, Isoform long	SIG12:Ig-like V-type 2	SIGLEC12	0	0	0.520654	0.508756	0.520298	-0.0406901	0.235443	0.488877	0.00682716	0.842823	0.0573158	0.274102	0.116539	0.0147877
X25287_7	Eukaryotic translation initiation factor 4 gamma 1	IF4G1	EIF4G1	0	0	0.594751	0.553045	0.520294	-0.167805	8.39918e-07	5.79063e-05	-0.0144495	0.67472	0.0236413	0.652133	0.0571647	0.233044
X7155_46	C4b-binding protein beta chain	C4b-binding protein beta chain	C4BPB	0	0	0.528968	0.513559	0.520286	0.0523371	0.126892	0.124187	0.0777006	0.0238161	-0.116193	0.0262271	-0.0837815	0.0802091
X24941_14	Clustered mitochondria protein homolog	CLU	CLUH	0	0	0.545982	0.521757	0.520279	-0.0780465	0.0227127	0.118576	0.00423826	0.902034	0.0271941	0.604061	0.0443011	0.355541
X16558_2	Myocilin	MYOC	MYOC	0	0	0.500535	0.528574	0.520271	-0.00562582	0.869753	0.14889	-0.0449887	0.19112	0.188593	0.000285333	0.290427	6.1038e-10
X22586_24	Butyrophilin subfamily 2 member A2	BT2A2	BTN2A2	0	0	0.516123	0.509862	0.520271	-0.0381495	0.266002	0.372822	-0.0535934	0.119319	0.0918227	0.0793671	0.134017	0.00501275
X14114_18	PILR alpha-associated neural protein	PIANP	PIANP	0	-0.0388657	0.531462	0.504051	0.520257	-0.0526721	0.124476	0.218056	-0.115771	0.000741657	0.076641	0.143367	0.179449	0.000162457
X23660_112	Kelch-like protein 41	KLH41	KLHL41	0	0	0.523376	0.523492	0.520231	0.0415624	0.225547	0.914469	0.102893	0.00273282	-0.133604	0.0105053	-0.196135	3.65093e-05
X9989_12	Leucine-rich repeat-containing protein 24	LRC24	LRRC24	0	0	0.519083	0.516735	0.520231	0.023002	0.502534	0.63974	0.0716197	0.0372756	-0.0707574	0.176781	-0.207086	1.27691e-05
X16883_57	Ras-related protein Rab-4A	RAB4A	RAB4A	0	0	0.548251	0.5137	0.520223	-0.0897738	0.00874514	0.08088	0.0489138	0.155183	-0.0675918	0.196995	-0.0980117	0.0405644
X3038_9	C-X-C motif chemokine 11	I-TAC	CXCL11	0	0	0.513875	0.528764	0.520197	-0.0153718	0.654113	0.567038	0.0357825	0.298541	0.0248366	0.635785	-0.0230771	0.630447
X19231_22	Protein tyrosine phosphatase type IVA 3	PRL-3	PTP4A3	0	0	0.538414	0.511307	0.52019	-0.0678182	0.0478248	0.04693	-0.0999902	0.00359903	0.153665	0.00320602	0.121533	0.0109983
X15457_14	Aminopeptidase N	Aminopeptidase N	ANPEP	0	0	0.527892	0.525469	0.520186	0.0504528	0.141171	0.531314	-0.0128543	0.708892	0.0203409	0.698125	0.0331626	0.48928
X12740_55	Protein FEV	FEV	FEV	0	0	0.521629	0.525376	0.520178	0.038924	0.256411	0.538666	0.075648	0.0277924	-0.0701955	0.180252	-0.190745	5.99745e-05
X21360_27	Sperm antigen with calponin homology and coiled-coil domains 1	SPEC1	SPECC1	0	0	0.532515	0.506456	0.520164	-0.0565552	0.0990066	0.38469	-0.0747553	0.0296927	0.173102	0.000882768	0.247458	1.60672e-07
X5755_29	Gastric inhibitory polypeptide	GIP	GIP	0	0	0.504559	0.502249	0.520156	-0.0196197	0.567393	0.480538	-0.0441638	0.199394	0.0437559	0.403923	0.00740183	0.87738
X23393_56	1-acylglycerol-3-phosphate O-acyltransferase ABHD5	ABHD5	ABHD5	0	0	0.510143	0.52134	0.520104	0.0169228	0.621822	0.531262	-0.054416	0.113746	0.0303514	0.562721	0.0258705	0.589644
X4546_27	Adhesion G protein-coupled receptor E2	EMR2	ADGRE2	0	0	0.515857	0.535681	0.520096	-0.0312227	0.362694	0.699906	-0.0959834	0.00520433	0.115646	0.0269464	0.149659	0.00170523
X23691_2	Tubulin--tyrosine ligase-like protein 12	TTL12	TTLL12	0	0	0.501082	0.526589	0.520078	0.00461482	0.893003	0.885347	0.152025	8.95e-06	-0.131608	0.0117301	-0.215441	5.5127e-06
X5699_19	Protein FAM189A2	CI061	FAM189A2	0	0	0.504233	0.536824	0.520063	0.0109254	0.75015	0.586483	-0.131274	0.000128568	-0.0456741	0.38361	0.011671	0.807783
X12665_16	Interleukin enhancer-binding factor 2	ILF2	ILF2	0	0	0.524551	0.531183	0.520026	-0.0446268	0.193139	0.175634	-0.0263413	0.444173	0.184414	0.000390468	0.165396	0.000517442
X4220_39	Tyrosine-protein kinase Fer	FER	FER	0	0	0.523249	0.512256	0.520003	0.0393541	0.251189	0.100109	0.102972	0.00271213	-0.0430836	0.411191	-0.100297	0.0360874
X24975_3	Fc receptor-like A	FCRLA	FCRLA	0	0	0.530614	0.544772	0.519996	-0.0583748	0.088595	0.300149	-0.0552009	0.10862	0.113961	0.0292679	0.119759	0.0122326
X3316_58	Heparin cofactor 2	Heparin cofactor II	SERPIND1	0	0	0.5274	0.525651	0.519996	-0.0486359	0.156077	0.28462	0.019557	0.570002	0.186942	0.000323234	0.110245	0.0211636
X15476_6	Regenerating islet-derived protein 3-gamma	REG3G	REG3G	0	0	0.511951	0.548659	0.519992	-0.0169701	0.620848	0.798964	0.101673	0.00307078	-0.000475345	0.992769	0.0727396	0.128953
X21555_17	Protein FAM3A	FAM3A	FAM3A	0	0	0.554566	0.546637	0.519989	0.0950236	0.00550559	0.0268144	0.0422004	0.220132	-0.0564651	0.281299	-0.105787	0.0270142
X7742_11	RING finger protein 148:region 1	RN148:region 1	RNF148	0	0	0.504423	0.518667	0.519977	0.00432428	0.899703	0.926027	0.0838637	0.0146889	-0.0885068	0.0908822	-0.0659283	0.168899
X21979_8	Integrin alpha-6	Integrin a6	ITGA6	0	0	0.524646	0.530733	0.519966	-0.0409559	0.232396	0.63161	-0.0495886	0.149559	0.047429	0.365585	-0.0145347	0.7619
X25256_153	Elongation factor 1-alpha 1	EF-1-alpha-1	EEF1A1	0	0	0.549061	0.532863	0.519959	-0.0887963	0.0095088	0.250992	-0.0532726	0.12155	0.224312	1.48e-05	0.232492	8.93737e-07
X21692_12	CD8A/CD8B Complex	CD8A/CD8B Complex	CD8A|CD8B	0	0	0.541437	0.520465	0.519936	0.0568211	0.0974269	0.0817881	0.015994	0.642258	-0.0591483	0.259028	-0.112208	0.0189578
X2645_54	Protein kinase C zeta type	PKC-Z	PRKCZ	0	0	0.519198	0.511493	0.519936	0.0371118	0.279235	0.70894	0.139358	4.76e-05	-0.193924	0.000189366	-0.327028	2.37515e-12
X13450_49	Ubiquitin carboxyl-terminal hydrolase 8	UBP8	USP8	0	0	0.523205	0.526265	0.519929	0.0367999	0.283298	0.655234	0.132698	0.000108348	-0.176933	0.000673316	-0.267757	1.30465e-08
X18888_37	Fatty acid-binding protein 12	FBP12	FABP12	0	0	0.528534	0.535197	0.51991	-0.0416287	0.224807	0.51842	-0.0684077	0.0466901	0.127913	0.0143325	0.206804	1.31278e-05
X3723_1	Brain natriuretic peptide 32	BNP-32	NPPB	0	0	0.512432	0.507275	0.51991	0.0330308	0.335555	0.018527	0.0510417	0.137975	-0.0840379	0.108476	-0.129491	0.00671598
X23702_98	SH3KBP1-binding protein 1	SHKB1	SHKBP1	0	0	0.551526	0.527144	0.519903	-0.0873986	0.0107039	0.208216	0.0794901	0.0207614	0.0479774	0.36006	0.00567113	0.905898
X9386_42	Tetratricopeptide repeat protein 9B	TTC9B	TTC9B	0	0	0.513343	0.524691	0.519869	-0.0174275	0.611465	0.488529	-0.0625856	0.0688409	0.0806365	0.123585	0.165692	0.000505438
X11107_25	Teneurin-3	TEN3	TENM3	0	0	0.51093	0.516299	0.519851	0.0159503	0.641989	0.350154	0.0686017	0.0460697	-0.100264	0.0553111	-0.144365	0.00248547
X21385_5	SLIT and NTRK-like protein 2	SLIK2	SLITRK2	0	-0.0388657	0.541194	0.50962	0.519836	-0.0732294	0.0325794	0.434373	-0.0786173	0.0222059	0.00295498	0.955072	0.0767853	0.10895
X15466_30	Collagen alpha-1(IX) chain	CO9A1	COL9A1	0	0	0.513785	0.534959	0.519828	-0.0192153	0.575409	0.388652	0.0498575	0.147361	-0.0413684	0.43008	0.017232	0.71943
X8304_50	Tumor necrosis factor receptor superfamily member 11B	OPG	TNFRSF11B	0	0	0.525384	0.51854	0.519828	0.0450696	0.188754	0.640382	-0.196117	8.83e-09	0.39562	3.66e-15	0.426606	9.39263e-21
X6471_53	Complement factor H-related protein 4	FHR4	CFHR4	0	0	0.553059	0.519266	0.519817	-0.0904935	0.00821836	0.0867074	0.0937501	0.00635646	0.0766069	0.143546	0.0221684	0.643974
X18204_1	Transcription elongation factor A protein 1	TCEA1	TCEA1	0	0	0.517561	0.538931	0.519799	-0.0345768	0.313414	0.243833	0.0556271	0.105914	-0.00370738	0.943649	-0.00225012	0.962591
X25307_8	WD repeat-containing protein 18	WDR18	WDR18	0	0	0.524365	0.520677	0.519795	-0.0433799	0.205888	0.216122	-0.0187795	0.585436	0.154072	0.00312508	0.205013	1.56457e-05
X25064_34	Type I inositol-3,4-bisphosphate 4-phosphatase	INP4A	INPP4A	0	0	0.557624	0.526459	0.519776	0.0937553	0.00616934	0.00665222	-0.145839	2.06e-05	0.0960053	0.066558	0.0967305	0.0432738
X15363_32	Apolipoprotein A-V	Apo A-V	APOA5	0	0	0.506316	0.517572	0.519769	0.00519066	0.879748	0.898196	0.00633787	0.853956	0.101067	0.0533757	0.170548	0.000341909
X14129_1	Interferon alpha-7	IFNA7	IFNA7	0	0	0.530389	0.521779	0.51975	0.0533762	0.119513	0.488863	-0.0205552	0.550475	-0.102997	0.0489601	-0.0772462	0.106835
X19743_12	V-set and transmembrane domain-containing protein 1	VSTM1	VSTM1	0	0	0.53897	0.533261	0.519743	-0.0597423	0.0813658	2.53938e-05	0.110304	0.00131186	-0.0952721	0.0686721	-0.0676378	0.158096
X13476_16	DNA/RNA-binding protein KIN17	KIN17	KIN	0	0	0.532793	0.517725	0.519735	0.0607529	0.0763362	0.123502	0.192211	1.75e-08	-0.235631	5.19e-06	-0.324867	3.36778e-12
X24323_43	BRO1 domain-containing protein BROX	BROX	BROX	0	0	0.513759	0.547643	0.519728	0.0256674	0.454321	0.663243	-0.149205	1.31e-05	-0.00708602	0.892532	0.0778398	0.10416
X14203_3	Annexin A7	ANXA7	ANXA7	0	0.00862667	0.547759	0.52016	0.519724	-0.100164	0.00342499	0.000386802	-0.0277408	0.420339	0.235492	5.26e-06	0.240042	3.81352e-07
X9495_10	C-X-C motif chemokine 17	VCC1	CXCL17	0	0	0.519161	0.536697	0.519694	0.0326508	0.341148	0.179875	-0.0161669	0.638664	-0.0544962	0.298442	-0.0587422	0.220379
X25413_80	G antigen 2	GAGE-2	GAGE2B	0	0	0.518912	0.556552	0.519687	0.0346139	0.312895	0.327949	-0.147214	1.72e-05	0.041348	0.430308	0.108795	0.0229328
X25922_7	Low-density lipoprotein receptor-related protein 5	LRP5	LRP5	0	0	0.504033	0.527576	0.519676	-0.000397972	0.990745	0.139513	0.0222975	0.517199	-0.0231495	0.658909	-0.160174	0.00077801
X4136_40	Interleukin-17D	IL-17D	IL17D	0	0	0.50096	0.502513	0.519594	0.00351608	0.918375	0.968887	-0.0386776	0.261125	0.0936988	0.0733941	0.149686	0.00170185
X5014_49	Cytoplasmic protein NCK1	NCK1	NCK1	0	0	0.531109	0.532557	0.519549	-0.0433134	0.206584	0.11354	0.01149	0.738594	0.0897624	0.0863736	0.108839	0.0228768
X6603_18	Anosmin-1	KALM	ANOS1	0	0	0.523124	0.533931	0.519546	0.0524932	0.125762	0.00672958	-0.168242	8.59e-07	0.0447124	0.393715	-0.00227235	0.962221
X7967_38	Putative POTE ankyrin domain family member M	POTEM	POTEM	0	0	0.501206	0.526842	0.519534	-0.00719866	0.833811	0.0365723	-0.0401765	0.243081	-0.0504529	0.335782	0.0188143	0.694901
X11539_4	ATP synthase subunit f, mitochondrial	ATPK	ATP5MF	0	0	0.526217	0.519024	0.519534	-0.0456449	0.183166	0.2712	6.39e-05	0.998519	0.0814333	0.119907	0.124203	0.00934854
X3474_19	Thrombospondin-1	Thrombospondin-1	THBS1	0	0	0.514075	0.504393	0.519534	-0.0275852	0.421307	0.630041	-0.200675	3.9e-09	0.440955	7.61e-19	0.567698	1.20119e-38
X5275_28	Proto-oncogene vav	VAV	VAV1	0	0	0.503275	0.511798	0.519512	0.00657907	0.847933	0.306002	0.117002	0.000650102	-0.00372662	0.943357	-0.256419	5.44548e-08
X17748_21	Quinone oxidoreductase PIG3	QORX	TP53I3	0	0	0.500911	0.517464	0.519508	-0.0107429	0.754187	0.288144	-0.1613	2.41e-06	0.203572	8.77e-05	0.23827	4.66939e-07
X23668_281	Mitochondrial dynamics protein MID51	MID51	MIEF1	0	0	0.507039	0.511307	0.519508	0.0261936	0.445121	0.0329424	0.0711239	0.0386141	-0.171522	0.000985489	-0.184086	0.000108684
X2567_5	Complement factor I	Factor I	CFI	0	0	0.519005	0.536917	0.519501	-0.0408541	0.233559	0.310517	0.0266045	0.439633	0.221012	1.98e-05	0.222905	2.5298e-06
X3152_57	Tumor necrosis factor receptor superfamily member 1B	TNF sR-II	TNFRSF1B	0	0	0.516968	0.532647	0.519501	0.0237448	0.488832	0.956298	-0.313208	1.04e-20	0.326868	1.47e-10	0.509216	3.30969e-30
X21925_15	Transforming growth factor beta-1	TGF-b1	TGFB1	0	0	0.517989	0.522096	0.519501	0.027165	0.428417	0.63857	-0.0099519	0.77255	0.0112221	0.830576	-0.11502	0.0161484
X22089_13	Protein BTG4	BTG4	BTG4	0	0	0.59016	0.516537	0.519482	-0.15535	5.22483e-06	1.7352e-07	-0.103127	0.00267213	0.246391	1.83e-06	0.332848	9.14684e-13
X12904_180	cubilin	cubilin	CUBN	0	0	0.504802	0.50401	0.519475	0.00751179	0.826694	0.383995	-0.0134188	0.696728	-0.0336713	0.520776	-0.0386666	0.420074
X11300_32	Sortilin	SORT	SORT1	0	0	0.506561	0.537274	0.519456	-0.00524916	0.878403	0.635718	0.0586849	0.0880341	-0.0338129	0.519024	-0.0200735	0.675605
X25960_15	Plastin-3	T-plastin	PLS3	0	0	0.52701	0.539162	0.519423	-0.0397799	0.246093	0.214908	-0.0925715	0.00705267	0.177727	0.000636152	0.236385	5.78119e-07
X16810_3	Rab GDP dissociation inhibitor alpha	RhoGDI	GDI1	0	0	0.529518	0.610512	0.519411	0.0502917	0.142447	0.548501	-0.285159	2.72e-17	0.048691	0.352953	0.184788	0.00010218
X7859_21	Protocadherin gamma-C3	PCDGK	PCDHGC3	0	0	0.511049	0.532081	0.519393	0.02099	0.540639	0.874521	-0.0715716	0.0374039	-0.0303197	0.56313	0.234978	6.77305e-07
X17802_4	Sialic acid synthase	SIAS	NANS	0	0	0.52788	0.51876	0.519374	-0.0606706	0.0767359	0.117112	-0.00835005	0.808381	0.121465	0.0201027	0.0607197	0.205208
X3313_21	Ficolin-2	FCN2	FCN2	0	0	0.508969	0.505339	0.519367	0.00604837	0.860067	0.361788	0.016589	0.629928	0.106039	0.0426186	0.0871897	0.0686206
X21166_1	Carboxy-terminal domain RNA polymerase II polypeptide A small phosphatase 1	CTDS1	CTDSP1	0	0	0.538579	0.528879	0.519359	-0.0761446	0.026246	0.113944	0.0750311	0.0290939	0.160436	0.0020785	0.11923	0.0126238
X19120_33	D-amino-acid oxidase	OXDA	DAO	0	0	0.500182	0.527978	0.519352	0.00191717	0.955439	0.764637	-0.0255206	0.458502	0.0212395	0.685484	0.00263375	0.956218
X14063_17	Oncostatin-M	OSM	OSM	0	0	0.505922	0.528008	0.519341	0.00661209	0.847179	0.903214	0.10349	0.00258038	-0.0567667	0.278734	-0.0428351	0.3717
X15403_53	DNA-binding protein inhibitor ID-2	ID2	ID2	0	0	0.524189	0.507476	0.51933	0.0483914	0.158171	0.299861	0.135621	7.59e-05	-0.24356	2.42e-06	-0.32094	6.30711e-12
X8229_1	Glucoside xylosyltransferase 1	GXLT1	GXYLT1	0	0	0.540873	0.502461	0.519326	-0.072022	0.0355624	0.46105	-0.0407779	0.236093	0.0953116	0.068557	0.163515	0.00060016
X22120_4	DDB1- and CUL4-associated factor 11	DCA11	DCAF11	0	0	0.529127	0.51503	0.519315	-0.0411292	0.230424	0.121704	0.0223678	0.515879	0.0192068	0.714198	-0.0208817	0.663331
X22508_2	NADH dehydrogenase	NDUBA	NDUFB10	0	0	0.513534	0.509255	0.519289	0.028863	0.400112	0.546133	-0.0104576	0.761334	-0.043591	0.405699	-0.057305	0.231897
X8376_25	Lutropin subunit beta	LSHB	LHB	0	0	0.511367	0.511932	0.519266	-0.0216582	0.527825	0.900584	-0.0159176	0.643848	-0.0535743	0.306702	0.00974572	0.839017
X9523_34	Integral membrane protein 2C:C-term	ITM2C:C-term	ITM2C	0	0	0.53277	0.522356	0.519259	0.0600538	0.0797876	0.421197	-0.0198365	0.564501	-0.166921	0.00135076	-0.11164	0.0195743
X5679_16	Beta-defensin 103	HBD-3	DEFB103A	-0.00690318	0	0.510609	0.521999	0.519259	-0.0238365	0.487154	0.00133543	0.020953	0.542786	-0.0297742	0.570176	-0.107163	0.0250758
X22799_17	TBC1 domain family member 28	TBC28	TBC1D28	0	0	0.54567	0.515603	0.519259	0.0741756	0.0303939	0.0855435	0.0377057	0.273307	-0.142849	0.0061895	-0.0972626	0.0421306
X4301_58	Thymidine kinase, cytosolic	Thymidine kinase	TK1	0	0	0.534503	0.528838	0.519255	-0.0584217	0.0883392	0.456548	0.0825149	0.0163691	0.0084663	0.871764	0.0818566	0.0874246
X11699_16	Protein tyrosine phosphatase type IVA 2	TP4A2	PTP4A2	0	0	0.518576	0.525186	0.51924	-0.0317717	0.354313	0.858517	-0.107633	0.00171801	0.212087	4.31e-05	0.215347	5.56588e-06
X3367_8	Fetuin-B	FETUB	FETUB	0	0	0.518443	0.558629	0.519218	-0.0362535	0.290512	0.299137	0.0522521	0.128863	0.151096	0.00376271	0.0654915	0.171746
X11262_39	TraB domain-containing protein	TRABD	TRABD	0	0	0.560914	0.532743	0.519196	-0.106434	0.00186455	0.00064797	-0.0987511	0.00403943	0.114363	0.0286992	0.23788	4.88111e-07
X23173_3	Metalloproteinase inhibitor 1	TIMP-1	TIMP1	0	0	0.501227	0.533574	0.519192	-0.00863471	0.801293	0.772844	-0.153777	7.03e-06	0.377351	7.87e-14	0.45476	1.086e-23
X13682_47	Macrophage colony-stimulating factor 1 receptor	M-CSF R	CSF1R	0	0	0.536056	0.502628	0.519188	-0.0632789	0.0648647	0.360604	-0.0896978	0.00904462	0.132698	0.0110464	0.079048	0.0988788
X7006_4	Collagen alpha-1(XXV) chain	COPA1	COL25A1	0	0	0.507968	0.533484	0.519181	0.0192405	0.574907	0.447894	0.0819035	0.0171847	-0.0858924	0.100874	-0.159739	0.00080446
X23365_7	Fibronectin type III domain-containing protein 8	FNDC8	FNDC8	0	0	0.512351	0.557136	0.519162	-0.0142831	0.677177	0.122969	-0.026446	0.442364	0.0272521	0.603289	0.130715	0.00621029
X19174_141	Golgin subfamily A member 7	GOGA7	GOLGA7	0	0	0.517413	0.521254	0.519151	0.0248249	0.469273	0.77404	0.0414297	0.228681	-0.0903567	0.0843032	-0.124522	0.00916674
X13694_24	Cytokine receptor-like factor 2	TSLP R	CRLF2	0	0	0.515877	0.530536	0.51914	-0.0287217	0.402423	0.712938	0.0656362	0.056348	-0.00271727	0.958683	-0.0622697	0.193857
X22118_7	Chondrosarcoma-associated gene 2/3 protein	CSAG2	CSAG2	0	0	0.505714	0.515942	0.51914	-0.0073215	0.831018	0.937041	0.0386576	0.261371	0.0107193	0.838059	0.0163843	0.73269
X5437_63	Fatty acid-binding protein, heart	FABP	FABP3	0	0	0.507484	0.510335	0.519125	0.0120687	0.725011	0.830176	-0.22442	4.05e-11	0.311136	1.17e-09	0.35214	3.33711e-14
X16074_12	GRB2-related adapter protein 2	GRB2-related adapter protein 2	GRAP2	0	0	0.519577	0.525677	0.519099	-0.0299317	0.382886	0.512414	-0.0251967	0.464226	0.0478715	0.361123	0.0722053	0.131794
X24915_123	Calpain-13	CAN13	CAPN13	0	0	0.512275	0.515402	0.519073	0.0273793	0.424783	0.332853	-0.197185	7.31e-09	0.05653	0.280746	0.174747	0.000241767
X22832_9	Zinc finger CCCH domain-containing protein 8	ZC3H8	ZC3H8	0	0	0.532807	0.522513	0.51905	-0.0568815	0.0970713	0.134003	-0.0793787	0.020941	0.231408	7.72e-06	0.32143	5.83578e-12
X11081_1	Glycerol-3-phosphate dehydrogenase [NAD(+)], cytoplasmic	GPDA	GPD1	0	0	0.502381	0.521295	0.51905	0.000888285	0.979345	0.819355	-0.0232568	0.499333	0.0559416	0.28579	-0.0702986	0.142331
X5657_28	CMP-N-acetylneuraminate-beta-galactosamide-alpha-2,3-sialyltransferase 1	SIA4A	ST3GAL1	0	0	0.546321	0.516418	0.519017	-0.087565	0.0105549	0.118971	-0.100988	0.00327674	0.279301	5.52e-08	0.311128	2.90839e-11
X6168_11	Cellular tumor antigen p53 R175H mutant	p53 R175H	TP53	0	0	0.511431	0.5537	0.519013	0.0255436	0.456501	0.495575	0.0876205	0.0107824	-0.175437	0.000748924	-0.206289	1.38092e-05
X11572_4	Dynamin-2	DYN2	DNM2	0	0.0158498	0.500396	0.542847	0.519013	-0.00605658	0.859879	0.565946	-0.134822	8.37e-05	0.0779793	0.136488	0.138457	0.00373077
X2794_60	Superoxide dismutase [Cu-Zn]	SOD	SOD1	0	0	0.557644	0.546358	0.519006	0.106072	0.00193295	0.0169012	-0.113997	0.000894836	-0.171537	0.000984461	-0.170185	0.000352174
X3394_81	Serine/threonine-protein kinase PLK1	PLK-1	PLK1	0	0	0.526608	0.500655	0.518998	0.0397238	0.24676	0.704739	0.0335501	0.329722	-0.0748901	0.152763	-0.169561	0.000370499
X14050_61	Ephrin-A4	Ephrin-A4	EFNA4	0	0	0.51378	0.515737	0.518991	-0.0291033	0.396199	0.780878	-0.124825	0.000273128	0.141455	0.00671659	0.260349	3.34381e-08
X16858_384	Reticulocalbin-3	RCN3	RCN3	0	0	0.520512	0.523752	0.518972	-0.038241	0.264856	0.745119	-0.0687737	0.0455252	0.0507302	0.33313	0.160932	0.000733848
X7234_12	Procollagen galactosyltransferase 2	GT252	COLGALT2	0	0	0.534893	0.536965	0.518957	0.0513371	0.134324	0.238024	0.0085139	0.804696	-0.0759619	0.146958	-0.126514	0.00810176
X7105_7	CDK5 and ABL1 enzyme substrate 2	CABL2	CABLES2	0	0	0.546445	0.515335	0.518957	-0.0735552	0.0318121	0.253423	-0.0666654	0.0525837	0.0802125	0.125578	0.221444	2.95266e-06
X18832_65	Serum amyloid A-2 protein	SAA2	SAA2	0	0	0.540769	0.516549	0.518946	0.0641533	0.061241	0.123246	-0.0279512	0.416821	-0.0948821	0.0698188	-0.117434	0.0140348
X12799_65	DnaJ homolog subfamily C member 27	DJC27	DNAJC27	0	0	0.530745	0.518265	0.518939	-0.0494373	0.149362	0.418821	-0.057393	0.0952673	-0.0158538	0.762436	0.0431186	0.36854
X23611_16	MARVEL domain-containing protein 2	MALD2	MARVELD2	0	0	0.534549	0.523038	0.518909	-0.0538924	0.115974	0.04372	-0.0112573	0.7437	0.0723444	0.167247	0.0998446	0.0369384
X8870_38	Nucleophosmin	NPM1	NPM1	0	0	0.517937	0.51742	0.51889	0.0359504	0.294567	0.445803	0.0283322	0.410497	-0.025415	0.627938	-0.10989	0.0215855
X7948_129	Glycolipid transfer protein domain-containing protein 2	GLTD2	GLTPD2	0	0	0.52806	0.545208	0.518883	-0.0631299	0.0654996	0.0432878	-0.0269904	0.433024	0.275343	8.63e-08	0.159539	0.00081693
X24923_27	Secernin-3	SCRN3	SCRN3	0	0	0.508222	0.515689	0.518883	0.0212123	0.53636	0.544954	0.0710447	0.0388315	-0.113333	0.0301776	-0.142733	0.00278474
X10342_55	E3 SUMO-protein ligase PIAS4	PIAS4	PIAS4	0	0	0.500512	0.509966	0.518864	-0.00321214	0.92541	0.44456	0.013868	0.687103	0.0314152	0.549106	0.0532172	0.266964
X6544_33	Protein kinase C-binding protein NELL1	NELL1	NELL1	0	0	0.502416	0.535212	0.518849	0.0104301	0.761124	0.502873	-0.127651	0.00019717	-0.0795334	0.128822	-0.00603221	0.899937
X11110_4	Transmembrane protein 119	TM119	TMEM119	0	0	0.519242	0.511791	0.518838	0.044058	0.198881	0.328644	0.00554601	0.872035	-0.113169	0.0304179	-0.0402866	0.400851
X3168_8	A disintegrin and metalloproteinase with thrombospondin motifs 5	ADAMTS-5	ADAMTS5	0	0	0.502772	0.507584	0.518838	-0.0103193	0.763585	0.661027	0.0682338	0.0472524	0.0114825	0.826705	-0.0876815	0.0670677
X5638_23	Procollagen galactosyltransferase 1	GT251	COLGALT1	0	0	0.52247	0.540245	0.518808	-0.0471335	0.169278	0.105185	0.059199	0.0852818	-0.0256091	0.625312	0.0233821	0.625933
X11312_40	Mismatch repair endonuclease PMS2	PMS2	PMS2	0	0	0.510835	0.533771	0.518808	-0.0207604	0.545078	0.43671	-0.0294151	0.392834	0.0399005	0.446637	0.0457871	0.339619
X13490_1	MAGUK p55 subfamily member 6	MPP6	MPP6	0	0	0.546873	0.501054	0.518797	0.0885365	0.00972153	0.00752177	0.0852904	0.0130788	-0.129248	0.0133389	-0.223763	2.30909e-06
X12699_28	T-complex protein 1 subunit theta	TCP-1-theta	CCT8	0	0	0.55224	0.54532	0.51879	-0.0988627	0.00387024	0.127351	0.0661684	0.0543745	0.0392171	0.454467	-0.0178544	0.709745
X21349_2	Serine/threonine/tyrosine-interacting protein	STYX	STYX	0	0	0.580638	0.553957	0.518764	-0.126724	0.000208508	2.27318e-06	4.02e-05	0.999068	0.000586737	0.991075	0.0492484	0.304331
X23615_4	TRM112-like protein	TR112	TRMT112	0	0	0.528705	0.513574	0.518764	-0.05302	0.122004	0.751619	-0.0637259	0.0639281	0.0142846	0.785346	0.121825	0.010806
X16043_30	SHC-transforming protein 1:Phosphotyrosine Interaction Domain	SHC1:PID	SHC1	0	0	0.512021	0.540692	0.518749	-0.0149003	0.664064	0.283704	0.0856635	0.0126842	-0.0483795	0.356045	-0.204965	1.572e-05
X7982_10	39S ribosomal protein L32, mitochondrial	RM32	MRPL32	0	0	0.519887	0.526154	0.518749	0.0293823	0.391685	0.705685	0.0234009	0.496678	-0.0335371	0.522441	-0.103099	0.0311773
X20939_113	H/ACA ribonucleoprotein complex subunit 2	NHP2	NHP2	0	0	0.518585	0.504203	0.518741	0.0365904	0.286049	0.329789	0.129594	0.000156975	-0.167148	0.00133014	-0.284211	1.45317e-09
X12575_30	C-1-tetrahydrofolate synthase, cytoplasmic	C1TC	MTHFD1	0	0	0.556724	0.52688	0.51873	-0.0994763	0.0036542	0.0522248	0.0170413	0.620623	0.0695357	0.184392	0.0687462	0.151375
X19635_69	Fibroleukin	FGL2	FGL2	0	0	0.526159	0.50975	0.51873	-0.0447014	0.192395	0.0996276	-0.0925064	0.00709302	0.146668	0.00493048	0.188923	7.07085e-05
X12872_35	Cyclic nucleotide-gated olfactory channel	CNGA2	CNGA2	0	0	0.545844	0.52742	0.518723	0.0738455	0.0311417	0.372068	0.00879632	0.798355	-0.0385934	0.461679	-0.130286	0.0063835
X12484_67	Phosphatidylinositol transfer protein beta isoform	PIPNB	PITPNB	0	0	0.555622	0.516627	0.518712	0.107267	0.00171576	0.00242549	0.0608141	0.0770837	-0.201782	0.000101423	-0.259004	3.9548e-08
X2828_82	Kunitz-type protease inhibitor 1	HAI-1	SPINT1	0	0	0.511827	0.525193	0.518704	-0.0273141	0.425887	0.125731	0.0371476	0.280475	0.17722	0.00065964	0.0269502	0.574204
X10818_36	Sphingomyelin phosphodiesterase	ASM	SMPD1	0	0	0.520275	0.506716	0.518704	-0.0427717	0.212323	0.486275	-0.00961022	0.780155	-0.0409758	0.434473	0.0112436	0.814692
X12675_14	Aspartate--tRNA ligase, cytoplasmic	SYDC	DARS1	0	0	0.523495	0.518529	0.518689	-0.0514965	0.133117	0.107017	-0.0721033	0.0360086	0.252018	1.04e-06	0.20316	1.87309e-05
X23547_21	Transcription elongation factor A protein 3	TCEA3	TCEA3	0	0	0.520544	0.529035	0.518678	-0.0340354	0.321056	0.520785	0.0777294	0.023764	-0.0460038	0.380184	-0.0509848	0.287576
X4192_10	Alcohol dehydrogenase [NADP(+)]	AK1A1	AKR1A1	0	0	0.544128	0.56842	0.518674	0.0741419	0.0304696	0.314979	-0.262249	9e-15	0.307228	1.93e-09	0.365608	2.88037e-15
X13671_40	Neutrophil elastase	Elastase	ELANE	0	0	0.520165	0.535431	0.518671	-0.038077	0.266913	0.830866	0.0140555	0.683101	0.201682	0.000102244	0.198253	2.99271e-05
X25083_26	Protein diaphanous homolog 1	Diaphanous-related formin-1	DIAPH1	0	0	0.550429	0.522159	0.518663	-0.0814532	0.0174068	0.243316	-0.137357	6.12e-05	0.23113	7.92e-06	0.330419	1.36545e-12
X21178_8	Probable cytosolic iron-sulfur protein assembly protein CIAO1	CIAO1	CIAO1	0	0	0.521866	0.5266	0.518656	-0.0438775	0.200729	0.478091	0.0822765	0.016683	-0.00876214	0.867323	-0.00112687	0.98126
X3836_51	Ubiquitin-fold modifier 1	UFM1	UFM1	0	0	0.530823	0.528272	0.518604	0.043979	0.199688	0.413488	-0.235371	4.1e-12	0.173529	0.000856743	0.188778	7.16397e-05
X16616_137	Beta-enolase	ENOB	ENO3	0	0	0.528207	0.529545	0.518589	-0.0444846	0.194563	0.208043	-0.101611	0.00308891	0.134098	0.0102204	0.110046	0.0213994
X19209_6	NF-kappa-B inhibitor alpha	IKB-alpha	NFKBIA	0	0	0.504123	0.51749	0.518578	-0.00233722	0.945689	0.445189	0.0625848	0.0688447	-0.0329205	0.530121	0.0166941	0.727835
X24946_9	Rho GTPase-activating protein 22	RHG22	ARHGAP22	0	0	0.51814	0.507796	0.518548	-0.0179896	0.600021	0.311434	0.0376521	0.273989	-0.0759969	0.146771	-0.0111639	0.815982
X24414_3	Glycogen phosphorylase, brain form	Glycogen phosphorylase	PYGB	0	0	0.524889	0.51526	0.518533	-0.0538665	0.116149	0.30874	0.00310105	0.928236	0.134505	0.00999064	0.0730947	0.12709
X25227_20	Transcription elongation factor A protein-like 2	TCAL2	TCEAL2	0	0	0.528453	0.517051	0.518522	0.0583295	0.0888433	0.18823	-0.0549954	0.109944	-0.0109134	0.835168	-0.00732713	0.878608
X8894_80	Heterogeneous nuclear ribonucleoprotein A/B	hnRNP A/B	HNRNPAB	0	0	0.536317	0.513544	0.518522	0.0637598	0.0628504	0.233231	0.151686	9.38e-06	-0.177307	0.000655588	-0.300976	1.33369e-10
X5631_83	Promotilin	MOTI	MLN	0	0	0.518319	0.549977	0.518477	-0.0267534	0.435451	0.83906	-0.0474019	0.168367	0.153399	0.00325998	0.257964	4.49962e-08
X6715_63	Alkaline phosphatase, placental-like	PPBN	ALPG	0	0	0.51021	0.539608	0.518473	0.0117163	0.732728	0.0567578	0.0530016	0.12346	-0.120326	0.0213092	-0.157659	0.000942807
X9030_56	Uncharacterized protein C17orf89	CQ089	NDUFAF8	0	0	0.500127	0.519546	0.518458	0.0060032	0.861102	0.602576	-0.138068	5.6e-05	-0.000178134	0.99729	0.0561943	0.241085
X4156_74	Transforming growth factor beta-2	TGF-b2	TGFB2	0	0	0.542054	0.519058	0.518455	0.0757234	0.0270898	0.235107	0.106149	0.00199068	-0.163494	0.00169955	-0.25943	3.75038e-08
X13399_33	RELT-like protein 1	RELL1	RELL1	0	0	0.500113	0.513831	0.518455	-0.00312254	0.927484	0.912633	-0.0343565	0.318225	-0.0120908	0.817681	0.0793625	0.0975396
X3284_75	Biglycan	BGN	BGN	0	0	0.519632	0.51819	0.518432	-0.0473231	0.167568	0.0789329	-0.0748242	0.0295422	0.113758	0.02956	0.185184	9.8675e-05
X6495_14	Endothelin-1	Endothelin 1	EDN1	0	0	0.51463	0.536708	0.518421	0.0289143	0.399275	0.703085	-0.0167749	0.626097	-0.111788	0.0325157	-0.0496696	0.300209
X5108_72	Neurogenic locus notch homolog protein 3	Notch-3	NOTCH3	0	-0.0388657	0.533264	0.517327	0.51838	-0.0657682	0.054988	0.147238	-0.0933209	0.00660251	0.145138	0.0054041	0.187913	7.74223e-05
X7775_15	Kallikrein-11	Kallikrein 11	KLK11	0	0	0.516004	0.516616	0.51838	-0.028089	0.412873	0.544487	0.10846	0.00158122	-0.067269	0.199147	-0.176624	0.000206532
X17699_43	Protein timeless homolog	TIMELESS	TIMELESS	0	0	0.52727	0.505361	0.51838	-0.0520548	0.128957	0.4445	0.000686161	0.984101	0.158969	0.00228631	0.15666	0.00101682
X4907_56	D-dimer	D-dimer	FGA|FGB|FGG	0	0	0.534853	0.502695	0.518376	0.0629226	0.0663913	0.835716	-0.094482	0.00595584	0.158029	0.00242937	0.219694	3.54859e-06
X12351_25	Signal transducer and activator of transcription 1-alpha/beta	STAT1	STAT1	0	0	0.534621	0.524951	0.518362	-0.0639873	0.0619158	0.085884	0.0320981	0.351095	0.0865272	0.0983714	-0.00118474	0.980298
X11342_59	Plexin domain-containing protein 2:Cytoplasmic domain	PXDC2:CD	PLXDC2	0	0	0.55938	0.536128	0.518354	-0.104214	0.00232113	0.0319798	0.0740855	0.0311907	0.101527	0.0522958	0.0579171	0.226941
X3728_52	Secretin	Secretin	SCT	0	0	0.50705	0.513816	0.518347	-0.0181175	0.597431	0.607595	0.0336841	0.327794	-0.141116	0.00685076	-0.128523	0.00714132
X6276_16	Furin	Furin	FURIN	0	0	0.507149	0.541641	0.518317	0.00526781	0.877974	0.423588	-0.102113	0.00294469	0.211127	4.68e-05	0.194659	4.18792e-05
X12527_50	Thyroid hormone receptor alpha	THA	THRA	0	0	0.518435	0.503552	0.518287	-0.0194061	0.57162	0.24108	0.0141484	0.681122	-0.0433516	0.408284	-0.0848836	0.0762998
X17828_3	Protein S100-A14	S100A14	S100A14	0	0	0.505335	0.518347	0.518272	0.00412719	0.904251	0.460368	-0.0033453	0.922601	0.0074637	0.886841	-0.134402	0.00488781
X22150_2	GA-binding protein subunit beta-1	GABP1	GABPB1	0	0	0.512327	0.523525	0.518254	0.0253386	0.460124	0.307868	0.067261	0.0505028	-0.0905193	0.0837439	-0.173856	0.00026039
X22082_25	Protein BEX2	BEX2	BEX2	0	0	0.523298	0.509754	0.518254	0.0467482	0.172795	0.233513	0.0177713	0.605733	-0.0364882	0.486489	-0.0978408	0.0409173
X15585_304	Fibulin-5	fibulin 5	FBLN5	0	0	0.510181	0.509896	0.518246	0.0107927	0.753085	0.81814	-0.193459	1.41e-08	0.19436	0.000183037	0.36224	5.37263e-15
X21429_50	Thimet oligopeptidase	THOP1	THOP1	0	0	0.512602	0.504341	0.518231	0.0193556	0.572621	0.656492	-0.148797	1.39e-05	-0.0493541	0.346426	0.184399	0.000105734
X15675_3	CCAAT/enhancer-binding protein beta	CEBPB	CEBPB	0	0	0.511407	0.506418	0.51822	-0.0201059	0.55783	0.390232	0.0169331	0.622843	0.011619	0.824679	0.0397299	0.407396
X15560_52	Transcobalamin-2	Apo-TC II	TCN2	0.00373919	0	0.520144	0.501497	0.51822	-0.0416036	0.225087	0.146067	0.0390338	0.256755	0.0164834	0.753302	0.0440432	0.358351
X23317_10	Dehydrogenase/reductase SDR family member 11	DHR11	DHRS11	0	0	0.512975	0.501668	0.518213	-0.0287631	0.401746	0.875231	-0.00341457	0.921003	0.00310214	0.952837	0.0238097	0.61963
X20937_43	Ribosomal RNA small subunit methyltransferase NEP1	NEP1	EMG1	0	0	0.534902	0.545383	0.518209	-0.0641968	0.0610651	0.67386	0.135255	7.93e-05	-0.189849	0.000259316	-0.20215	2.0647e-05
X18913_3	Cyclin-H	Cyclin H	CCNH	0	0	0.516864	0.526567	0.518205	0.0330493	0.335284	0.537118	0.05735	0.0955156	-0.0896104	0.0869095	-0.153561	0.00128172
X7693_13	Tumor necrosis factor receptor superfamily member 10B	TRAIL R2	TNFRSF10B	0	0	0.524247	0.514974	0.518187	-0.0448881	0.190542	0.334809	-0.114101	0.000885085	0.112738	0.0310592	0.236237	5.87864e-07
X7115_5	Semenogelin-1	Semenogelin	SEMG1	0	0	0.523058	0.536001	0.518179	-0.0413576	0.227844	0.4994	0.0509362	0.138792	0.161514	0.00193683	0.163309	0.000609916
X21929_53	UB2D3/PolyUbiquitin K48	UB2D3/ PolyUbiquitin K48	UBE2D3|UBB	0	0	0.532723	0.529419	0.518175	-0.0649183	0.0582092	0.280218	-0.0135475	0.693966	0.0812286	0.120843	0.0194759	0.684737
X19808_26	Ras-related protein Rab-3D	RAB3D	RAB3D	0	0	0.5246	0.518749	0.51812	-0.0362085	0.291111	0.252149	0.116662	0.000674244	-0.0940426	0.0723403	-0.12043	0.0117524
X9745_20	Eukaryotic translation initiation factor 4E type 2	IF4E2	EIF4E2	0	0	0.555449	0.519564	0.518112	-0.0914856	0.00753871	0.0331726	-0.0198192	0.56484	0.0417848	0.425449	0.166142	0.000487655
X11571_75	NKG2-E type II integral membrane protein:Isoform E, Extracellular domain	NKG2E:ECD	KLRC3	0	0	0.563465	0.529385	0.518094	-0.111236	0.00114516	0.013538	-0.113848	0.000908953	0.159941	0.00214664	0.247514	1.59602e-07
X3091_70	Aurora kinase A	Aurora kinase A	AURKA	0	0	0.516997	0.541868	0.518075	0.0374393	0.275011	0.0642956	-0.0168442	0.624671	-0.050722	0.333208	-0.0380124	0.427986
X23627_3	UPF0369 protein C6orf57	CF057	SDHAF4	0	0	0.503862	0.530219	0.518075	0.0136984	0.68969	0.307043	0.0143102	0.677678	-0.111498	0.032971	0.0939016	0.0497992
X9941_70	Protocadherin beta-1	PCDB1	PCDHB1	0	0	0.500373	0.522844	0.518075	0.00855402	0.803112	0.0727974	-0.00543417	0.874594	-0.0485746	0.354106	-0.0663766	0.166014
X9075_121	UPF0258 protein KIAA1024	K1024	MINAR1	0	0	0.522757	0.53198	0.518071	0.0482139	0.159704	0.490029	-0.000402579	0.990671	-0.159014	0.00227962	-0.0896718	0.0610748
X3893_64	Mesothelin	Mesothelin	MSLN	0	0	0.533881	0.529493	0.518067	-0.0691653	0.0435577	0.289821	0.0339314	0.324253	0.0902389	0.0847104	0.0593184	0.215878
X18295_102	Glyoxylate reductase/hydroxypyruvate reductase	GRHPR	GRHPR	0	0	0.547559	0.521779	0.518053	-0.0917906	0.00734011	0.0191826	-0.0932915	0.00661969	0.142687	0.00624901	0.175013	0.000236455
X2640_3	Macrophage-stimulating protein receptor	MSP R	MST1R	0	0	0.511257	0.517807	0.518038	-0.00485012	0.887583	0.0768552	0.023028	0.503564	0.0287642	0.583334	-0.186684	8.63964e-05
X9360_33	EGF-like repeat and discoidin I-like domain-containing protein 3	EDIL3	EDIL3	0	0	0.503622	0.526842	0.518034	0.00153181	0.964389	0.736288	0.0515558	0.134046	-0.114839	0.0280373	-0.121629	0.0109347
X20562_78	Killer cell lectin-like receptor subfamily B member 1	KLRB1	KLRB1	0	0	0.531621	0.502357	0.518034	0.0651996	0.0571263	0.137046	0.0626568	0.0685255	-0.222935	1.67e-05	-0.142947	0.00274377
X8863_3	Phosphatidylinositol 3-kinase regulatory subunit alpha	P85A	PIK3R1	0	0	0.557289	0.504185	0.518019	0.0981493	0.00413593	0.0634372	0.150316	1.13e-05	-0.208099	6.03e-05	-0.333834	7.76505e-13
X6605_17	Insulin-like growth factor-binding protein complex acid labile subunit	IGFALS	IGFALS	0	0	0.506981	0.534832	0.517978	-0.0140549	0.68205	0.646656	0.106125	0.00199524	-0.0451225	0.389386	-0.08225	0.0859087
X3881_49	Dynein light chain 1, cytoplasmic	DLC8	DYNLL1	0	0	0.522751	0.52376	0.517978	0.0386774	0.259437	0.710894	0.0582597	0.0903644	-0.0863687	0.0989915	-0.151868	0.00145195
X2708_54	Tumor necrosis factor ligand superfamily member 18	TNFSF18	TNFSF18	0	0	0.5101	0.520986	0.517978	0.00416557	0.903365	0.362708	0.0689821	0.044873	0.0158534	0.762443	-0.145035	0.00237131
X9026_40	Butyrophilin-like protein 8	BTNL8	BTNL8	0	0	0.515683	0.527516	0.517952	0.0189487	0.580721	0.873564	0.050757	0.140188	-0.0972649	0.063051	-0.0804102	0.0931827
X9118_7	PH and SEC7 domain-containing protein 2	PSD2	PSD2	0	0	0.534121	0.51491	0.517952	-0.0667519	0.0514467	0.17053	-0.0240961	0.483973	0.108349	0.0382793	0.19018	6.31244e-05
X2785_15	C-C motif chemokine 8	MCP-2	CCL8	0	0	0.511387	0.53198	0.517941	-0.0277098	0.419212	0.574996	0.0117613	0.732654	0.104345	0.0460579	0.00544896	0.909569
X16781_2	Cytosolic endo-beta-N-acetylglucosaminidase	ENASE	ENGASE	0	0	0.511757	0.529601	0.517926	-0.0209167	0.542055	0.556762	-0.039388	0.252461	0.0989041	0.0587164	0.102719	0.0318067
X21181_10	LRP2-binding protein	LR2BP	LRP2BP	0	0	0.554069	0.539813	0.517915	-0.0978596	0.00424848	0.0199893	-0.0247828	0.471599	0.226671	1.19e-05	0.211564	8.17371e-06
X23324_6	Heat shock protein beta-3	HSPB3	HSPB3	0	0	0.502815	0.529482	0.517907	-0.00497916	0.884613	0.90724	-0.0520522	0.130335	0.0393155	0.453335	0.0912886	0.0565383
X23301_2	MSX-2	MSX-2	MSX2	0	0	0.530114	0.503064	0.517907	0.0443508	0.19591	0.456912	0.0506716	0.140857	0.0032781	0.950165	0.0787144	0.100316
X21815_7	MOB kinase activator 3B	MOB3B	MOB3B	0	0	0.513331	0.527114	0.5179	-0.0231246	0.500257	0.0320259	0.0762467	0.0265775	-0.075373	0.150126	-0.0997117	0.0371919
X9177_6	Protein FAM3B	FAM3B	FAM3B	0	0	0.507212	0.500387	0.517893	0.00802257	0.815116	0.527313	0.0675531	0.0495076	-0.0577612	0.270385	-0.080483	0.0928857
X7797_11	Coiled-coil domain-containing protein 167	CC167	CCDC167	0	0	0.509362	0.513406	0.517852	-0.0121477	0.723284	0.548492	0.0568239	0.0986008	0.0315947	0.546825	0.071077	0.137954
X2851_63	C5a anaphylatoxin	C5a	C5	0	0	0.519274	0.557594	0.517803	-0.0340089	0.321433	0.66877	-0.034058	0.32245	0.229383	9.31e-06	0.242894	2.74406e-07
X12357_41	Synaptosomal-associated protein 29	SNP29	SNAP29	0	0	0.55003	0.521247	0.517799	-0.080762	0.0183857	0.0951452	-0.0039864	0.907829	0.118656	0.0231907	0.0374821	0.434463
X2681_23	Hepatocyte growth factor	HGF	HGF	0	0	0.510511	0.516764	0.517792	0.0157948	0.645238	0.780528	-0.172369	4.56e-07	0.0976807	0.0619273	0.218458	4.03702e-06
X21439_37	Hematopoietic lineage cell-specific protein	HCLS1	HCLS1	0	0	0.555139	0.549627	0.517781	-0.0959486	0.00506291	0.0995474	-0.0298484	0.385896	0.263311	3.21e-07	0.347165	8.01087e-14
X24967_4	Protocadherin-1	PCDH1	PCDH1	0	0.00294911	0.521064	0.509497	0.517777	-0.0382781	0.264392	0.525797	-0.0943517	0.00602544	0.0694451	0.184966	0.141183	0.00309911
X4153_11	Alpha-1-antichymotrypsin complex	alpha-1-antichymotrypsin complex	SERPINA3	0	0	0.52015	0.515852	0.517766	0.0315982	0.356948	0.481236	-0.114702	0.000830794	0.257677	5.81e-07	0.333033	8.86995e-13
X11282_16	Macrophage scavenger receptor types I and II:Extracellular domain	Macrophage scavenger receptor:ECD	MSR1	0	0	0.54554	0.514598	0.517766	-0.0731119	0.0328601	0.0949731	-0.0872166	0.0111528	0.0969176	0.0640026	0.267627	1.32675e-08
X13553_4	DCN1-like protein 3	DCNL3	DCUN1D3	0	0	0.504843	0.524713	0.517762	-0.00460832	0.893153	0.000661149	-0.032202	0.349537	0.100119	0.0556656	0.0247093	0.606459
X22007_1	Resistin-like beta	RELM-beta	RETNLB	0	0	0.529229	0.511109	0.517744	-0.0537863	0.116694	0.135761	0.039038	0.256704	0.0887607	0.0899556	-0.0156106	0.744864
X13515_8	Regulation of nuclear pre-mRNA domain-containing protein 1A	RPR1A	RPRD1A	0	0	0.522042	0.539184	0.517725	0.0436104	0.203486	0.278381	0.0155612	0.651288	-0.0768855	0.142091	-0.138027	0.00384052
X16753_46	Collagen alpha-2(VI) chain	CO6A2	COL6A2	0	0	0.540674	0.516176	0.517718	0.0627569	0.0671111	0.221936	0.0570958	0.0969969	0.106048	0.0426014	-0.0455381	0.342255
X16887_29	Peptidyl-tRNA hydrolase 2, mitochondrial	PTH2	PTRH2	0	0	0.52609	0.520945	0.517691	-0.0528795	0.122997	0.102949	-0.0616022	0.0733226	0.178831	0.000587597	0.129796	0.00658652
X19254_125	GMP reductase 1	GMPR1	GMPR	0	0	0.513855	0.534184	0.51768	-0.0211179	0.538176	0.878285	0.0259198	0.451499	-0.0378886	0.469906	-0.0320233	0.504334
X10647_18	Activating signal cointegrator 1 complex subunit 1	ASCC1	ASCC1	0	0	0.500746	0.518708	0.517669	0.000855731	0.980102	0.878395	-0.135291	7.9e-05	0.135376	0.00951471	0.226165	1.78499e-06
X18950_13	Ras-related C3 botulinum toxin substrate 2	RAC2	RAC2	0	0	0.536594	0.523142	0.517658	-0.0679757	0.0473087	0.326962	0.212884	3.98e-10	-0.0924683	0.0772687	-0.178899	0.000170273
X23178_95	Histamine N-methyltransferase	HNMT	HNMT	0	0	0.51737	0.527353	0.517643	0.0258677	0.450806	0.974326	-0.183988	7.06e-08	0.179687	0.000552336	0.194905	4.09339e-05
X8269_327	Arylsulfatase K	ARSK	ARSK	0	0	0.510386	0.516031	0.517632	-0.0277324	0.418832	0.811746	0.106515	0.00191996	-0.195194	0.000171473	-0.182466	0.000125208
X8033_1	DnaJ homolog subfamily C member 18	DJC18	DNAJC18	0	0	0.508896	0.528771	0.517624	0.0170737	0.618717	0.329515	-0.168135	8.73e-07	0.133435	0.0106045	0.229551	1.23569e-06
X12020_39	Bisphosphoglycerate mutase	PMGE	BPGM	0	0	0.526257	0.514672	0.51761	-0.05625	0.100845	0.236465	-9.79e-05	0.997732	0.117151	0.0250079	0.0907054	0.0581414
X18899_82	Hepatoma-derived growth factor-related protein 3	HDGR3	HDGFL3	0	0	0.55439	0.528257	0.517602	0.0886018	0.00966764	0.0657716	0.0695056	0.0432693	-0.0896162	0.0868894	-0.122509	0.0103675
X18294_26	Transcription factor SOX-2	SOX2	SOX2	0	0	0.53325	0.51739	0.517602	-0.052564	0.125251	0.072157	0.0149823	0.66345	-0.0512244	0.328435	0.000375327	0.993758
X21604_2	Protein CutA	CUTA	CUTA	0	0.0158498	0.549254	0.508533	0.517602	-0.0870017	0.0110667	0.119551	-0.0347922	0.312122	0.017469	0.73907	0.0272526	0.569914
X17450_51	Histidine--tRNA ligase, cytoplasmic	Histidyl-tRNA synthetase	HARS1	0	0	0.503032	0.523648	0.517598	-0.00104036	0.97581	0.848771	-0.200336	4.15e-09	0.303336	3.15e-09	0.401134	2.52744e-18
X9579_59	Transmembrane gamma-carboxyglutamic acid protein 4	TMG4	PRRG4	0	0	0.501047	0.518038	0.517598	-0.0104922	0.759745	0.0799903	-0.0925741	0.00705104	0.133509	0.0105611	0.179475	0.000162097
X3151_6	Interleukin-2 receptor subunit alpha	IL-2 sRa	IL2RA	0	0	0.514691	0.530219	0.517595	-0.0301539	0.379363	0.70387	0.0173007	0.615314	0.0376593	0.4726	0.0188695	0.694051
X23670_11	2-(3-amino-3-carboxypropyl)histidine synthase subunit 2	DPH2	DPH2	0	0	0.507574	0.511176	0.517595	0.0166564	0.627319	0.696307	-0.00423886	0.90202	0.0980497	0.0609439	-0.0408616	0.394157
X21227_18	SULT 1A1*2	SULT 1A1*2	SULT1A1	0	0	0.532891	0.526969	0.517584	0.055476	0.105628	0.497045	0.169085	7.56e-07	-0.160131	0.00212024	-0.28734	9.41571e-10
X16746_12	Activin B	Activin B	INHBB	0	0	0.535862	0.503998	0.517584	0.0652341	0.0569945	0.166874	0.15616	5.03e-06	-0.087804	0.093487	-0.25159	9.80591e-08
X25472_12	Brain-enriched guanylate kinase-associated protein	BEGIN	BEGAIN	0	0	0.52105	0.52172	0.517572	-0.0341606	0.319278	0.909823	-0.0669293	0.0516531	0.0339662	0.51713	0.18255	0.000124304
X14078_69	Lymphotactin	Lymphotactin	XCL1	0	0	0.530204	0.56017	0.517561	-0.050656	0.139574	0.183248	-0.111893	0.0011143	0.164796	0.00155826	0.258411	4.25714e-08
X10976_44	Mucin-1:region 3	MUC1:region 3	MUC1	0	0	0.521151	0.526921	0.517561	-0.0180621	0.598552	0.00482561	-0.0372192	0.279548	0.0447879	0.392916	0.0880087	0.0660504
X19503_2	Sorting nexin-3	SNX3	SNX3	0	0	0.549749	0.514356	0.517561	-0.0810382	0.0179889	0.375963	-0.0861853	0.0121501	0.152756	0.00339395	0.248966	1.34306e-07
X5701_81	Tetranectin	Tetranectin	CLEC3B	0	0	0.514156	0.532114	0.517543	-0.0316164	0.356671	0.688633	-0.120058	0.000466116	0.180142	0.000534366	0.234239	7.35733e-07
X19131_184	Nucleolysin TIAR	TIAR	TIAL1	0	0	0.54974	0.522755	0.517543	0.0896236	0.00885885	0.0680208	0.137557	5.97e-05	-0.195387	0.000168896	-0.303362	9.37244e-11
X2638_12	Macrophage colony-stimulating factor 1 receptor	M-CSF R	CSF1R	0	0	0.523344	0.510826	0.517535	-0.0464061	0.175963	0.242286	-0.0908803	0.00817109	0.0964267	0.0653673	0.0840689	0.0791742
X23531_79	Hematopoietic SH2 domain-containing protein	HSH2D	HSH2D	0	0	0.519392	0.521701	0.517531	0.0293099	0.392853	0.158191	0.0629163	0.0673854	0.0294954	0.573794	-0.13664	0.00421445
X7551_33	Leucine-rich repeat-containing protein 32	LRC32	LRRC32	0	0	0.544539	0.54163	0.517528	-0.0815552	0.0172661	0.0826017	-0.066763	0.0522378	0.124155	0.0174869	0.206553	1.34564e-05
X2938_55	Apolipoprotein E (isoform E4)	Apo E4	APOE	0	0	0.539181	0.52478	0.517516	0.0800213	0.019488	0.00255381	-0.00576374	0.867057	-0.185929	0.000348771	-0.177732	0.000188058
X12533_135	Cytohesin-2	CYH2	CYTH2	0	0	0.509645	0.518458	0.517516	-0.00788545	0.818221	0.102643	-0.0408266	0.235533	0.106469	0.0417803	-0.0153587	0.748843
X3072_4	Interleukin-13	IL-13	IL13	0	0	0.526087	0.515912	0.517483	0.0493292	0.150254	0.352306	0.047704	0.165667	-0.0866509	0.0978895	-0.188936	7.06309e-05
X11696_7	Cellular retinoic acid-binding protein 2	RABP2	CRABP2	0	0	0.537231	0.525621	0.517468	-0.0759307	0.0266716	0.061557	-0.0599647	0.0813113	0.254873	7.77e-07	0.285275	1.25459e-09
X21750_25	Ubiquitin carboxyl-terminal hydrolase BAP1	BAP1	BAP1	0	0	0.530137	0.522617	0.517468	-0.0526098	0.124922	0.114316	0.0714413	0.0377526	-0.0017765	0.972981	-0.196467	3.53923e-05
X22068_5	Serine/threonine-protein phosphatase 2A 56 kDa regulatory subunit delta isoform	2A5D	PPP2R5D	0	0	0.54013	0.534683	0.517449	0.0655538	0.0557864	0.114252	-0.205849	1.51e-09	0.206395	6.95e-05	0.223472	2.38178e-06
X12975_11	Keratin, type I cytoskeletal 20	Keratin 20	KRT20	0	0	0.505315	0.524813	0.517449	-0.00978463	0.775497	0.76796	-0.1158	0.000739337	0.245911	1.92e-06	0.370006	1.26178e-15
X12991_49	Cullin-9	CUL9	CUL9	0	0	0.503046	0.533838	0.517438	-0.00130722	0.969607	0.752782	-0.00353838	0.918149	-0.0411629	0.432377	0.0109383	0.819636
X5900_11	Histidine triad nucleotide-binding protein 1	HINT1	HINT1	0	0	0.525068	0.530621	0.517431	0.0449509	0.189922	0.360462	-0.0122512	0.721971	-0.0325485	0.534782	-0.146144	0.00219291
X10041_3	Hepatocyte nuclear factor 4-alpha	HNF4A	HNF4A	0	0	0.511925	0.517453	0.517394	-0.0230534	0.501579	0.315091	-0.136702	6.64e-05	0.331958	7.29e-11	0.406967	7.31828e-19
X14268_4	Sulfiredoxin-1	SRXN1	SRXN1	0	-0.0388657	0.501779	0.526816	0.517375	0.00792427	0.817341	0.66138	-0.105675	0.00208564	-0.0265355	0.612852	0.0341731	0.476134
X23424_4	Ankyrin repeat domain-containing protein 63	ANR63	None	0	0	0.536496	0.526269	0.517375	-0.0695564	0.0423807	0.27983	-0.00960622	0.780244	0.122884	0.0186836	0.152094	0.00142802
X2632_5	Interleukin-12 receptor subunit beta-1	IL-12 Rb1	IL12RB1	0	0	0.539626	0.514412	0.517375	0.0743781	0.0299428	0.222327	0.146266	1.95e-05	-0.226615	1.2e-05	-0.312176	2.47684e-11
X8700_325	Polypeptide N-acetylgalactosaminyltransferase 11	GLT11	GALNT11	0	0	0.519077	0.50889	0.517375	0.0409554	0.232402	0.0270209	-0.0229119	0.505719	-0.051929	0.321817	-0.000780646	0.987017
X8399_6	Serine/threonine-protein kinase 17B	DRAK2	STK17B	0	0	0.523428	0.522051	0.517356	0.0336409	0.3267	0.49895	0.0596372	0.0829907	-0.103741	0.047339	-0.0957231	0.0455099
X24678_10	Cell death regulator Aven	AVEN	AVEN	0	0	0.512076	0.536288	0.517327	-0.02241	0.513597	0.861304	0.0518366	0.131937	0.0581288	0.267343	-0.0802559	0.0938141
X18172_71	Histone chaperone ASF1A	ASF1A	ASF1A	0	0	0.523544	0.533704	0.517323	-0.0343693	0.31633	0.426597	-0.0263655	0.443755	0.0895094	0.0872673	0.0551967	0.249553
X15432_1	Otoraplin	Otoraplin	OTOR	0	0	0.531378	0.523533	0.517315	-0.0502077	0.143116	0.527296	-0.0319885	0.352742	0.178898	0.000584748	0.153807	0.00125855
X2855_49	Mitogen-activated protein kinase 3	ERK-1	MAPK3	0	0	0.512628	0.521575	0.517315	0.0138336	0.686789	0.607647	-0.17974	1.42e-07	0.218743	2.42e-05	0.164233	0.000567239
X7258_5	Bone marrow proteoglycan	EMBP	PRG2	0	0	0.510762	0.514397	0.517304	-0.0184141	0.591442	0.987007	-0.00184659	0.957229	0.109956	0.0354862	0.0619774	0.195962
X13670_81	Group IIE secretory phospholipase A2	GIIE	PLA2G2E	0	0	0.527519	0.500685	0.517304	-0.0530306	0.121929	0.466175	-0.145923	2.04e-05	0.220103	2.15e-05	0.269149	1.08974e-08
X3302_58	Cystatin-F	CYTF	CST7	0	0	0.528393	0.524084	0.517297	0.0555471	0.105182	0.247263	0.107726	0.00170203	-0.227099	1.15e-05	-0.332972	8.96035e-13
X24271_9	Mannose-1-phosphate guanyltransferase alpha	GMPPA	GMPPA	0	0	0.50773	0.53039	0.517267	-0.000209845	0.99512	0.249694	-0.00339886	0.921366	0.0192006	0.714286	0.00669041	0.889086
X9253_52	Histo-blood group ABO system transferase	BGAT	ABO	0	0	0.528731	0.526448	0.517248	-0.0535582	0.118255	0.435489	0.0436628	0.204546	-0.0140962	0.788109	0.0324384	0.498821
X15516_12	Serum amyloid A-4 protein	SAA-4	SAA4	0	0	0.50841	0.556917	0.517237	-0.0218148	0.524845	0.591335	0.0805065	0.0191828	0.130887	0.0122025	0.0503763	0.293376
X11513_92	ADP-ribosyl cyclase/cyclic ADP-ribose hydrolase 1	CD38	CD38	0	0	0.511945	0.518585	0.517226	-0.0172421	0.615261	0.389484	0.0102639	0.765625	-0.015632	0.765663	0.0331447	0.489516
X10743_13	SLIT and NTRK-like protein 1	SLIK1	SLITRK1	0	-0.0388657	0.544105	0.502919	0.517215	-0.0791371	0.0208788	0.120669	-0.0808446	0.0186816	0.0743967	0.155493	0.119271	0.0125929
X8810_26	Hepatocyte cell adhesion molecule	HEPACAM	HEPACAM	0	0	0.538744	0.507089	0.517189	0.0621491	0.0698068	0.237042	-0.0268396	0.4356	0.027627	0.598313	-0.0459196	0.338222
X21897_4	IL-17/IL-17F	IL-17/ IL-17F	IL17A|IL17F	0	0	0.500295	0.528164	0.51717	-0.00509997	0.881833	0.781225	0.0317297	0.356654	0.0578676	0.269502	-0.0391756	0.413976
X3719_2	Cyclin-dependent kinase inhibitor 1B	p27Kip1	CDKN1B	0	0	0.526431	0.500119	0.517159	0.0432232	0.207532	0.183434	0.0964642	0.00498244	-0.0757656	0.148008	-0.12661	0.00805366
X5009_11	Moesin	Moesin	MSN	0	0	0.525708	0.536857	0.517148	0.0521022	0.128608	5.38055e-06	0.0672876	0.0504116	-0.0886078	0.0905126	-0.119646	0.0123149
X12747_89	RNA-binding protein 3	RBM3	RBM3	0	0	0.534465	0.537203	0.517137	-0.0628271	0.0668054	0.272955	-0.0407885	0.235972	0.319694	3.84e-10	0.351235	3.91758e-14
X6296_36	Oncoprotein-induced transcript 3 protein	OIT3	OIT3	0	0	0.507137	0.500454	0.517133	-0.0137952	0.687614	0.0816405	0.154781	6.11e-06	-0.0247372	0.637138	-0.171242	0.000323049
X25261_42	Ankyrin repeat and SAM domain-containing protein 3	ANKS3	ANKS3	0	0	0.502948	0.527293	0.517129	0.0100044	0.770594	0.252154	0.0295037	0.391409	-0.0138524	0.791689	-0.0684041	0.153426
X19286_30	Myosin light chain 5	MLR5	MYL5	0	0	0.534297	0.514836	0.517122	-0.0545716	0.111443	0.570108	-0.00275322	0.936267	0.149554	0.0041374	0.0408297	0.394527
X23618_23	Zinc finger protein 593	ZN593	ZNF593	0	0	0.505225	0.508235	0.517122	-0.00795891	0.816557	0.839487	0.0250655	0.466556	-0.118544	0.0233214	-0.00674786	0.88814
X8989_40	Signal peptide, CUB and EGF-like domain-containing protein 1	SCUB1	SCUBE1	0	0	0.50602	0.519002	0.517107	0.00747164	0.827606	0.832036	-0.0981113	0.00428544	0.126987	0.0150592	0.187731	7.86885e-05
X9875_107	THO complex subunit 1	THOC1	THOC1	0	0	0.532489	0.511962	0.517107	0.0592045	0.0841498	0.39783	0.163399	1.77e-06	-0.264316	2.88e-07	-0.346233	9.42366e-14
X23006_19	Phosphatidylinositol 5-phosphate 4-kinase type-2 beta	PI42B	PIP4K2B	0	0	0.518869	0.511169	0.517107	0.0361116	0.292406	0.445944	0.155613	5.44e-06	-0.134656	0.00990654	-0.334299	7.18641e-13
X22833_74	Zinc finger CCHC domain-containing protein 18	ZCC18	ZCCHC18	0	0	0.547655	0.515528	0.517103	-0.0854322	0.0126105	0.0290793	-0.15096	1.04e-05	0.184218	0.000396195	0.271528	7.99163e-09
X4240_31	Pyruvate kinase PKM	M2-PK	PKM	0	0	0.531092	0.520428	0.5171	-0.0591748	0.0843058	0.367022	0.028624	0.405692	0.231937	7.35e-06	0.171984	0.000303964
X12701_1	Eukaryotic translation initiation factor 1b	EIF1B	EIF1B	0	0	0.526636	0.520331	0.517092	-0.0532029	0.12072	0.145204	0.069698	0.0426922	0.0475249	0.364614	0.0500384	0.29663
X14324_52	Structural maintenance of chromosomes protein 3	CSPG6	SMC3	0	0	0.540998	0.536343	0.51707	-0.0830109	0.0153661	0.262675	-0.00762841	0.82466	0.17102	0.00102041	0.127783	0.00748245
X3461_58	Brevican core protein	PGCB	BCAN	0	0	0.503304	0.541664	0.517036	0.00910005	0.790827	0.930527	-0.126989	0.000212948	-0.0857752	0.101342	0.0779069	0.103861
X21391_17	Choriogonadotropin subunit beta 3	b-CF	CGB3	0	0	0.506628	0.504352	0.517036	-0.00408808	0.905155	0.091931	-0.0612015	0.0752158	-0.0174256	0.739696	0.0821764	0.0861909
X18194_18	Fatty acid-binding protein 9	FABP9	FABP9	0	0	0.505404	0.521347	0.517033	-0.0123506	0.718857	0.553749	-0.129829	0.000152687	0.157635	0.00249174	0.273896	5.85129e-09
X9332_6	Beta-defensin 136	DB136	DEFB136	0	0	0.532246	0.506418	0.517033	0.0534904	0.118722	0.551522	-0.0877122	0.0106998	0.0375395	0.474011	-0.0106694	0.823997
X12934_1	E3 ISG15--protein ligase HERC5	HERC5	HERC5	0	0	0.507924	0.506255	0.517025	-0.0123275	0.71936	0.878999	-0.090882	0.00816987	0.0795962	0.128519	0.119777	0.0122194
X25252_29	MTSS1-like protein	MTSSL	MTSS2	0	0	0.575226	0.524962	0.51698	-0.130551	0.000132681	0.0223995	0.0315598	0.359235	0.0564686	0.28127	0.0456185	0.341402
X15542_19	Creatine kinase U-type, mitochondrial	KCRU	CKMT1A	0	0	0.52841	0.594608	0.516977	0.0414844	0.22642	0.594245	-0.216167	2.11e-10	0.00938294	0.858019	0.044447	0.353957
X19438_68	Pre-mRNA-splicing factor SYF2	SYF2	SYF2	0	0	0.503182	0.54848	0.516958	0.0163458	0.633753	0.285085	-0.21448	2.93e-10	0.0988179	0.0589379	0.230802	1.07717e-06
X24651_1	Reticulon-1	RTN1	RTN1	0	0	0.52885	0.542323	0.516932	0.0534704	0.11886	0.427012	-0.092749	0.00694361	0.0645029	0.218295	0.092419	0.0535353
X13526_5	Lupus La protein:RNA recognition motif	LA:RRM	SSB	0	0	0.545169	0.521455	0.516932	0.0753207	0.027918	0.345121	0.138251	5.47e-05	-0.142347	0.00637475	-0.302326	1.09286e-10
X5202_4	Peptidyl-prolyl cis-trans isomerase D	PPID	PPID	0	0	0.532885	0.524892	0.516921	-0.0581318	0.0899325	0.0418661	0.0904262	0.00849722	0.0417479	0.425858	-0.100652	0.0354314
X9963_19	Protocadherin beta-10	PCDBA	PCDHB10	0	0	0.55614	0.531604	0.516895	-0.0924617	0.00691949	0.0562342	-0.103087	0.00268233	0.182019	0.000465963	0.341092	2.28553e-13
X8750_46	Vinculin	Vinculin	VCL	0	0	0.528462	0.534095	0.516887	0.0506041	0.139981	0.545371	0.0495507	0.149871	-0.08515	0.103865	-0.27401	5.76353e-09
X6003_28	Sialidase-1	NEUR1	NEU1	0	0	0.514792	0.530636	0.516858	0.0268379	0.434001	0.695654	0.0479996	0.163058	-0.0514171	0.326617	-0.169471	0.000373196
X6525_17	Dual specificity protein phosphatase 13 isoform A	DUSP13	DUSP13	0	0	0.524018	0.514188	0.516831	0.0458014	0.181668	0.386459	0.0664793	0.0532482	0.0398012	0.447771	-0.0593342	0.215756
X20167_6	Ras-related protein Rab-8B	RAB8B	RAB8B	0	0	0.545045	0.500119	0.516824	-0.0804496	0.0188439	0.105743	0.195031	1.07e-08	-0.158791	0.00231277	-0.155892	0.00107726
X3171_57	Amyloid beta A4 protein	amyloid precursor protein	APP	0	0	0.523032	0.53695	0.516813	0.0519075	0.130045	0.1368	0.0344359	0.317107	-0.146031	0.00512303	-0.210535	9.06435e-06
X13378_80	Glutaredoxin-like protein C5orf63	YD286	C5orf63	0	0	0.537726	0.526459	0.516813	-0.0638165	0.0626163	0.439283	0.0290624	0.398536	0.0665584	0.203946	0.0665693	0.164785
X4566_24	R-spondin-2	RSPO2	RSPO2	0	0	0.501675	0.52226	0.516805	-0.000789676	0.981637	0.541663	-0.000390869	0.990943	0.0414084	0.429633	-0.0464763	0.332392
X9877_28	Crk-like protein	CRKL	CRKL	0	-0.0643914	0.519412	0.599626	0.516783	0.0295655	0.388736	0.867168	-0.314674	6.7e-21	0.203083	9.12e-05	0.377392	3.06631e-16
X13712_104	Granzyme A	granzyme A	GZMA	0	0	0.511552	0.57246	0.516768	-0.0189646	0.580404	0.394102	0.0188858	0.583315	-0.00747023	0.886743	-0.0321222	0.503017
X21664_6	Core histone macro-H2A.1	H2AY	MACROH2A1	0	0	0.509657	0.507949	0.516768	0.0128848	0.707245	0.840533	0.0335358	0.329929	0.0529273	0.312589	-0.0494671	0.302186
X15566_10	Calponin-1	Calponin-1	CNN1	0	0	0.509547	0.508254	0.516764	-0.0230345	0.50193	0.76309	-0.221637	7.11e-11	0.371815	1.92e-13	0.536164	6.84122e-34
X25041_11	6-phosphofructo-2-kinase/fructose-2,6-bisphosphatase 4	F264	PFKFB4	0	0	0.528789	0.524545	0.516746	-0.0393611	0.251105	0.11767	0.169945	6.63e-07	-0.068365	0.191909	-0.197849	3.10898e-05
X8635_283	Zona pellucida-binding protein 1	ZPBP1	ZPBP	0	0	0.532425	0.507424	0.516735	-0.058192	0.0895995	0.00726117	-0.0370049	0.282329	0.0585127	0.26419	0.0244016	0.610949
X6392_7	WNT1-inducible-signaling pathway protein 2	WISP-2	CCN5	0	0	0.530461	0.524177	0.516731	-0.0603422	0.0783488	0.116896	-0.131733	0.000121695	0.485993	4.31e-23	0.519743	1.31697e-31
X10708_3	Progonadoliberin-2	GON2	GNRH2	0	0	0.504496	0.516366	0.51672	-0.0093706	0.784758	0.673705	0.0102709	0.765469	0.0421192	0.42175	0.205893	1.43564e-05
X6285_71	Malectin	K0152	MLEC	0	0	0.509585	0.557449	0.516694	0.0114309	0.739	0.659283	-0.298843	6.5e-19	0.2288	9.82e-06	0.345575	1.05643e-13
X12569_25	T-complex protein 1 subunit epsilon	TCP-1-epsilon	CCT5	0	0	0.546199	0.524128	0.516679	-0.0875272	0.0105886	0.237526	0.0164244	0.633328	0.109261	0.0366719	0.0925498	0.0531967
X6290_3	Urotensin-2B	UTS2B	UTS2B	0	0	0.528048	0.517029	0.516671	0.0510568	0.136466	0.398903	0.110375	0.00130241	-0.137917	0.00823872	-0.211665	8.09107e-06
X8978_30	Mitogen-activated protein kinase kinase kinase kinase 3	M4K3	MAP4K3	0	0	0.51058	0.514184	0.516664	0.0182858	0.594029	0.937406	0.0409674	0.233921	-0.0514536	0.326273	-0.134828	0.00475256
X6645_53	Periostin	Periostin	POSTN	0	0	0.523269	0.521589	0.516656	-0.0431828	0.207957	0.596875	-0.187291	4.06e-08	0.42997	6.69e-18	0.519949	1.23482e-31
X12345_4	Anaphase-promoting complex subunit 10	APC10	ANAPC10	0	0	0.505254	0.507036	0.516649	0.0162163	0.636446	0.727014	-0.10438	0.00236727	-0.0255524	0.626079	0.0295505	0.537826
X24494_67	Katanin p60 ATPase-containing subunit A-like 1	KATL1	KATNAL1	0	0	0.533976	0.534717	0.516627	0.0608702	0.0757688	0.500294	0.128125	0.000186556	-0.0804915	0.124264	-0.172182	0.000299052
X14705_1	Vascular endothelial growth factor D	VEGF-D	VEGFD	0.00623434	0	0.549955	0.545025	0.516623	0.087843	0.0103102	0.215778	-0.067055	0.0512145	0.00408682	0.937893	0.123067	0.0100216
X21961_14	CD2-associated protein	CD2AP	CD2AP	0	0	0.52473	0.523905	0.516619	0.0459411	0.180338	0.00495751	0.043411	0.207171	-0.178826	0.000587792	-0.148813	0.00181253
X22421_79	E3 ubiquitin-protein ligase pellino homolog 1	PELI1	PELI1	0	0	0.559571	0.527148	0.516571	0.103089	0.00258945	0.0712144	0.124873	0.000271612	-0.199012	0.000126744	-0.217898	4.2788e-06
X7903_18	Vesicle-associated membrane protein 3	VAMP3	VAMP3	0	0	0.536895	0.520394	0.516571	0.0616903	0.0719001	0.273053	0.0458109	0.183127	-0.0690131	0.18772	-0.129717	0.00662
X3864_5	40S ribosomal protein S7	RS7	RPS7	0	0	0.540303	0.518563	0.516571	0.066775	0.0513657	0.483711	0.139423	4.72e-05	-0.207097	6.56e-05	-0.284892	1.32268e-09
X23264_42	Mediator of RNA polymerase II transcription subunit 10	MED10	MED10	0	0	0.521128	0.519359	0.516563	-0.0393486	0.251255	0.473509	-0.071104	0.0386686	0.189333	0.000269717	0.309009	4.01594e-11
X18343_10	Peroxisomal 2,4-dienoyl-CoA reductase	DECR2	DECR2	0	0	0.50745	0.519326	0.51656	0.0087816	0.797986	0.441378	0.0119976	0.727496	-0.027037	0.606152	0.0913714	0.0563135
X9744_139	DnaJ homolog subfamily A member 4	DNJA4	DNAJA4	0	0	0.532023	0.552739	0.516549	0.0484282	0.157854	0.315105	-0.104137	0.0024236	0.0837563	0.109669	0.0783976	0.101695
X21971_47	Friend leukemia integration 1 transcription factor	FLI1	FLI1	0	0	0.521009	0.50201	0.516549	0.0390666	0.254671	0.279851	0.152163	8.78e-06	-0.163596	0.001688	-0.307713	4.8861e-11
X22506_25	N-acetyltransferase 5	NAT5	NAA20	0	0	0.502598	0.503574	0.516545	-0.0074667	0.827718	0.819691	0.0313766	0.362033	0.0859228	0.100753	-0.0460881	0.336451
X7909_37	Sex hormone-binding globulin	SHBG	SHBG	0	0	0.513652	0.524948	0.51653	-0.0287064	0.402674	0.286612	-0.119985	0.000469853	0.263799	3.05e-07	0.305167	7.16266e-11
X23307_7	Clusterin-associated protein 1	CLUA1	CLUAP1	0	0	0.556201	0.513094	0.516504	-0.120419	0.000427368	8.59966e-10	-0.100838	0.00332339	0.216398	2.98e-05	0.280332	2.47029e-09
X6247_9	Signal-regulatory protein beta-1	SIRB1	SIRPB1	0	0	0.504626	0.54631	0.516493	-0.0128518	0.707961	0.764358	-0.0326543	0.342807	0.100291	0.0552432	0.161166	0.000720705
X21931_27	UB2L3/PolyUbiquitin K48	UB2L3/ PolyUbiquitin K48	UBE2L3|UBB	0	0	0.51717	0.514438	0.516478	0.0245944	0.47341	0.92642	0.0723243	0.0354418	-0.136399	0.00898132	-0.12899	0.00693289
X6920_1	GDNF family receptor alpha-like	GFRAL	GFRAL	0	0	0.500179	0.501452	0.516478	0.0106934	0.755282	0.30802	-0.000699757	0.983786	0.0775695	0.138567	-0.119484	0.0124344
X20964_13	40S ribosomal protein S14	RS14	RPS14	0	0	0.581396	0.532736	0.51647	-0.150737	9.93109e-06	2.38163e-05	0.0390141	0.256995	0.0578109	0.269972	0.131966	0.00572945
X23767_1	UPF0705 protein C11orf49	CK049	C11orf49	0	0	0.512356	0.537851	0.516467	-0.0205122	0.549896	0.206994	0.071121	0.038622	0.0845401	0.106374	0.0151844	0.751599
X9288_7	Peptidyl-prolyl cis-trans isomerase FKBP7	FKBP7	FKBP7	0	0	0.507791	0.511858	0.516463	-0.0174752	0.610491	0.764681	-0.0819722	0.0170912	0.258428	5.37e-07	0.256454	5.42201e-08
X24950_21	Specifically androgen-regulated gene protein	SARG	SARG	0	0	0.516667	0.517636	0.516459	0.0298999	0.383392	0.967808	0.0137052	0.690585	-0.0858274	0.101133	-0.055917	0.243419
X2911_27	Midkine	Midkine	MDK	0	0	0.535897	0.539098	0.516452	-0.0592997	0.0836514	0.258082	-0.0719739	0.036344	0.0682372	0.192743	0.134076	0.00499334
X13993_20	Band 4.1-like protein 1	E41L1	EPB41L1	0	0	0.503318	0.503362	0.516444	-0.0105566	0.758316	0.920671	0.167208	1e-06	-0.0769116	0.141955	-0.0974681	0.0416961
X3453_87	Tyrosine-protein kinase Lyn	LYN	LYN	0	0	0.50346	0.513138	0.516422	-0.001122	0.973912	0.903819	0.205881	1.5e-09	-0.165319	0.00150465	-0.281308	2.1632e-09
X8664_36	Extracellular tyrosine-protein kinase PKDCC	PKDCC	PKDCC	0	0	0.523492	0.524773	0.516414	-0.0360859	0.292749	0.0256487	0.0229978	0.504124	-0.00107945	0.98358	0.0179603	0.708101
X12077_32	Growth/differentiation factor 8	Myostatin	MSTN	0	0	0.511781	0.506988	0.516411	-0.0244754	0.475554	0.510596	0.0331813	0.33507	0.0197268	0.706812	-0.0124664	0.794965
X20437_9	Axonemal dynein light intermediate polypeptide 1	IDLC	DNALI1	0	0	0.515087	0.521035	0.516403	0.027831	0.41718	0.722833	0.0442476	0.198542	-0.0322069	0.539079	-0.0670661	0.161649
X4154_57	P-selectin	P-Selectin	SELP	0	0	0.53121	0.509162	0.516396	-0.0571221	0.0956632	0.00713208	-0.0608809	0.0767589	0.258183	5.51e-07	0.38303	1.01615e-16
X14034_22	Tumor-associated calcium signal transducer 2	GA733-1 protein	TACSTD2	0	0	0.528717	0.500261	0.516392	0.0453734	0.185788	0.643291	0.0685004	0.0463929	-0.146731	0.00491172	-0.184853	0.000101593
X8631_13	Erythroid membrane-associated protein	ERMAP	ERMAP	0	0	0.505966	0.519948	0.516385	-0.0122247	0.721604	0.952464	-0.059254	0.0849914	-0.000694058	0.989442	0.0751448	0.116744
X11682_7	Thioredoxin-interacting protein	TXNIP	TXNIP	0	0	0.514535	0.528123	0.516366	0.0361589	0.291774	0.247354	-0.0818315	0.0172829	0.0414373	0.429312	0.147152	0.00204147
X6584_1	Sarcoplasmic reticulum histidine-rich calcium-binding protein	SRCH	HRC	0	0	0.530941	0.503354	0.516359	-0.0531557	0.12105	0.141891	0.0157536	0.647268	-0.0103629	0.843373	0.0232803	0.627437
X25962_51	Serine/threonine-protein kinase WNK1	WNK1	WNK1	0	0	0.505112	0.514076	0.516355	-0.0147971	0.666247	0.803354	-0.0437495	0.203647	-0.0380244	0.468314	0.0950296	0.0471048
X15467_10	Collagen triple helix repeat-containing protein 1	CTHR1	CTHRC1	0	0	0.514541	0.521459	0.516351	-0.0314663	0.35896	0.498763	-0.122205	0.000367241	0.237405	4.39e-06	0.313294	2.08521e-11
X8854_59	Ribonucleoside-diphosphate reductase subunit M2 B	RIR2B	RRM2B	0	0	0.511708	0.52475	0.516347	-0.0207745	0.544805	0.461428	-0.049674	0.148858	0.0588537	0.261412	0.120093	0.0119912
X13976_9	Rho guanine nucleotide exchange factor 1	ARHG1	ARHGEF1	0	0	0.522925	0.513879	0.516329	0.0426535	0.213591	0.382176	0.166539	1.11e-06	-0.223638	1.57e-05	-0.234598	7.06784e-07
X22492_108	LIM domain only protein 3	LMO3	LMO3	0	0	0.536994	0.544906	0.516318	0.0703957	0.0399453	0.0706899	-0.0195774	0.569599	-0.0115753	0.825328	-0.0630207	0.188526
X3030_3	C-type lectin domain family 4 member M	DC-SIGNR	CLEC4M	0	0	0.504721	0.539877	0.51628	-0.0127085	0.711069	0.893212	-0.0806058	0.0190344	0.28664	2.37e-08	0.291857	4.98454e-10
X7849_3	Glutaminyl-peptide cyclotransferase	Glutaminyl cyclase	QPCT	0	-0.0388657	0.533742	0.504665	0.516228	-0.0596605	0.081784	0.699386	-0.0890624	0.00954762	0.0404429	0.440477	0.079522	0.0968661
X19116_1	Biogenesis of lysosome-related organelles complex 1 subunit 5	MUTED	BLOC1S5	0	0	0.514083	0.505543	0.516221	0.0218911	0.523396	0.713455	0.0622608	0.0702958	-0.0768239	0.142412	-0.166297	0.000481691
X16927_9	Coagulation factor XIII	Coagulation factor XIII	F13A1|F13B	0	0	0.50889	0.530975	0.51621	-0.0168759	0.622788	0.454918	0.0242466	0.481246	0.174263	0.00081366	0.160684	0.000748047
X25089_21	Transcription intermediary factor 1-beta	KRIP-1	TRIM28	0	0	0.538709	0.527505	0.516202	-0.0706435	0.0392492	0.120317	-0.124266	0.000291064	0.10635	0.0420118	0.185629	9.48701e-05
X4254_6	NudC domain-containing protein 3	NUDC3	NUDCD3	0	0	0.524247	0.565051	0.516184	0.0368968	0.282032	0.48733	-0.259463	1.76e-14	0.147242	0.0047625	0.204446	1.65341e-05
X22367_17	UPF0705 protein C11orf49	CK049	C11orf49	0	0	0.519635	0.521954	0.516184	-0.0320016	0.350838	0.589715	0.0606071	0.078097	-0.0137509	0.793181	0.0728176	0.128542
X9730_22	GH3 domain-containing protein	GHDC	GHDC	0	0	0.501149	0.504453	0.516184	0.00253592	0.94108	0.537563	0.000188464	0.995633	-0.00207096	0.968504	0.0894956	0.0615868
X9506_10	Apolipoprotein L1	Apo L1	APOL1	0	-0.0388657	0.550449	0.512033	0.516176	-0.0892602	0.00913927	0.183266	-0.0659668	0.0551149	0.0617708	0.238467	0.163827	0.000585662
X23578_6	Small integral membrane protein 3	SMIM3	SMIM3	0	0	0.55095	0.536232	0.516154	-0.0848463	0.0132338	0.00535593	0.0162273	0.63741	0.12448	0.0171921	0.151941	0.00144412
X11590_5	Probable RNA-binding protein 23	RBM23	RBM23	0	0	0.527201	0.525584	0.516154	0.0486851	0.155658	0.594406	0.158751	3.48e-06	-0.260567	4.29e-07	-0.342484	1.80085e-13
X7968_15	Cytotoxic and regulatory T-cell molecule	CRTAM	CRTAM	0	0	0.520966	0.557266	0.516146	-0.0420639	0.219994	0.0436842	-0.0761861	0.0266983	0.056857	0.277968	0.200023	2.53051e-05
X11117_2	Spermatogenesis-associated protein 20	SPT20	SPATA20	0	0	0.512403	0.535152	0.516146	0.0283849	0.407966	0.608211	-0.0329491	0.338465	-0.0278843	0.594909	-0.0725915	0.129735
X11645_9	Prolyl 4-hydroxylase subunit alpha-1	P4HA1	P4HA1	0	0	0.502827	0.529705	0.516146	0.0021828	0.949272	0.518339	-0.015754	0.64726	-0.0485168	0.354679	-0.0502559	0.294532
X8325_37	Alcohol dehydrogenase 4	ADH4	ADH4	0	0	0.510016	0.522513	0.516128	-0.0213665	0.5334	0.263615	0.0227614	0.508518	0.134957	0.00974107	-0.0134194	0.77968
X19614_8	Transcobalamin-1	Holo-TC I	TCN1	0	0	0.50668	0.518771	0.516109	-0.0182673	0.594402	0.746036	0.109657	0.00140116	0.125696	0.0161269	-0.123924	0.00951012
X18935_14	Toll-like receptor 5	TLR5	TLR5	0	0	0.554372	0.529925	0.516079	-0.0925064	0.00689229	0.095836	-0.0648724	0.0592841	0.169922	0.00110067	0.26617	1.60001e-08
X20423_40	Calcium and integrin-binding protein 1	CIB1	CIB1	0	0	0.538105	0.526437	0.516068	-0.071869	0.0359565	0.190874	-0.0796224	0.0205497	0.129214	0.0133634	0.252096	9.22532e-08
X7146_5	Protein disulfide-isomerase A4	PDIA4	PDIA4	0	0	0.526573	0.517416	0.516068	-0.0355533	0.299936	0.480213	-0.0968144	0.00482618	0.0713016	0.173467	0.116603	0.0147326
X12923_51	Keratin, type I cytoskeletal 17	Keratin 17	KRT17	0	0	0.530342	0.522479	0.516057	-0.0615457	0.0725701	0.109875	-0.0596353	0.0830005	0.121139	0.0204421	0.185558	9.54639e-05
X9873_17	Steroid hormone receptor ERR1	ERRalpha	ESRRA	0	0	0.517816	0.531552	0.516053	0.0436617	0.202954	0.133311	-0.0142962	0.677975	-0.0348855	0.505847	-0.128779	0.00702631
X10087_10	Alpha-crystallin A chain	Alpha crystallin A chain	CRYAA	0	0	0.50061	0.513146	0.516046	0.00698241	0.838734	0.430752	0.059936	0.0814575	-0.081153	0.121191	-0.0514672	0.283034
X9793_145	Immunoglobulin superfamily DCC subclass member 4	IGDC4	IGDCC4	0	0	0.501444	0.520856	0.516042	-0.00227327	0.947173	0.885092	-0.169295	7.32e-07	0.138127	0.00814042	0.240581	3.58481e-07
X8099_42	Spondin-2	SPON2	SPON2	0	0	0.505323	0.516359	0.516027	-0.0162503	0.635738	0.414858	-0.0278258	0.418917	0.214292	3.57e-05	0.225581	1.90071e-06
X12774_12	Potassium/sodium hyperpolarization-activated cyclic nucleotide-gated channel 1	HCN1	HCN1	0	0	0.508401	0.514713	0.516027	-0.0269947	0.431319	0.2688	-0.0122021	0.72304	0.140169	0.00723795	0.0479048	0.31773
X24645_2	Bridging integrator 3	BIN3	BIN3	0	0	0.534271	0.518998	0.516012	-0.0598512	0.080811	0.606686	-0.120065	0.000465734	0.184665	0.000383263	0.322924	4.5992e-12
X6556_5	Ectonucleotide pyrophosphatase/phosphodiesterase family member 5	ENPP5	ENPP5	0	-0.0388657	0.51264	0.547125	0.516001	0.0161765	0.637273	0.929374	-0.14545	2.17e-05	-0.0138885	0.791159	0.0729741	0.127721
X2943_5	Cytochrome P450 3A4	Cytochrome P450 3A4	CYP3A4	0	0	0.58678	0.528615	0.51599	-0.149723	1.14073e-05	0.000192141	-0.0816681	0.0175081	0.122045	0.0195115	0.212732	7.26475e-06
X11407_57	Phospholipid scramblase 3	PLS3	PLSCR3	0	0	0.521064	0.516027	0.515975	-0.0421464	0.219089	0.301983	-0.0114758	0.738905	0.0668833	0.201741	0.00388259	0.935496
X10889_2	Melanocortin-2 receptor accessory protein 2	MRAP2	MRAP2	0	0	0.576487	0.517196	0.51596	-0.145296	2.06785e-05	1.37089e-05	-0.0590343	0.0861555	0.19563	0.0001657	0.351377	3.8204e-14
X17755_5	UDP-glucose 6-dehydrogenase	UGDH	UGDH	0	0	0.511451	0.527137	0.515945	-0.0230658	0.501348	0.413496	-0.00435974	0.89924	0.0853187	0.103179	0.0298752	0.533365
X18265_18	Zinc finger protein 34	ZNF34	ZNF34	0	0	0.54786	0.518358	0.515927	-0.0809058	0.0181782	0.341266	-0.0540857	0.115958	0.0939532	0.0726131	0.170865	0.000333171
X15326_64	Guanylate-binding protein 1	GBP1	GBP1	0	0	0.529631	0.530197	0.515886	-0.0518205	0.13069	0.20128	-0.0726641	0.0345852	0.242455	2.7e-06	0.282576	1.81912e-09
X9013_60	Netrin-1	NET1	NTN1	0	0	0.504915	0.548961	0.515882	0.0042187	0.902139	0.964153	-0.220489	8.95e-11	0.253546	8.9e-07	0.354565	2.16505e-14
X23289_25	Neurogenin-1	NGN1	NEUROG1	0	0	0.503344	0.522986	0.515882	0.0139272	0.684783	0.282983	-0.069193	0.0442212	0.032016	0.541489	0.0834982	0.0812396
X24962_7	SH3 domain-containing kinase-binding protein 1	SH3K1	SH3KBP1	0	0	0.502367	0.515607	0.515871	0.000887985	0.979352	0.408641	0.0368124	0.28484	-0.0325599	0.534639	-0.137751	0.00391248
X22146_20	Fos-related antigen 2	FOSL2	FOSL2	0	0	0.520509	0.515275	0.515852	0.0389123	0.256554	0.136281	-0.0233713	0.497221	-0.0276642	0.59782	0.0545414	0.255227
X3210_1	Methionine aminopeptidase 1	METAP1	METAP1	0	0	0.533617	0.512539	0.515852	0.057784	0.0918742	0.441285	0.166725	1.08e-06	-0.219206	2.33e-05	-0.291566	5.19489e-10
X19316_2	Iron-sulfur cluster co-chaperone protein HscB, mitochondrial	HSC20	HSCB	0	0	0.559183	0.527107	0.515849	-0.0958458	0.00511046	0.00710711	0.00726365	0.832917	0.0356069	0.497084	0.0917438	0.0553127
X12761_12	Amyloid beta A4 precursor protein-binding family B member 2:Phosphotyrosine Interaction Domain 2	APBB2:PID 2	APBB2	0	0	0.512544	0.514598	0.515834	0.0214992	0.530861	0.586418	0.116028	0.000721582	-0.116208	0.0262081	-0.106483	0.0260191
X9557_5	MANSC domain-containing protein 1	MANS1	MANSC1	0	-0.0643914	0.525572	0.510514	0.515826	-0.0492094	0.151249	0.604121	-0.124419	0.000286061	0.0953586	0.06842	0.160503	0.000758549
X10551_7	Linker for activation of T-cells family member 1	LAT	LAT	0	0	0.541842	0.500249	0.515823	0.0780383	0.022727	0.0810802	0.060226	0.0799909	-0.153472	0.00324524	-0.177356	0.00019414
X14086_11	Acid sphingomyelinase-like phosphodiesterase 3a	ASM3A	SMPDL3A	0	0	0.526842	0.526035	0.515808	-0.0524061	0.126392	0.597361	0.0726976	0.0345016	-0.0255082	0.626676	-0.0782972	0.102135
X6022_57	Protein kinase C-binding protein NELL2	NELL2	NELL2	0	0	0.514844	0.507714	0.515793	-0.0329799	0.336301	0.133002	-0.0710361	0.0388552	0.151382	0.00369661	0.172796	0.000284286
X2775_54	Interleukin-17F	IL-17F	IL17F	0	0	0.53754	0.512423	0.515778	-0.0603617	0.0782522	0.219092	-0.0241179	0.483578	0.034948	0.505085	0.073935	0.122767
X6075_61	Beta-hexosaminidase subunit beta	Hexosaminidase B	HEXB	0	0	0.512217	0.503246	0.515778	-0.0271522	0.428635	0.0934855	-0.0837309	0.0148473	0.216937	2.84e-05	0.289641	6.81971e-10
X10439_57	Alpha-amylase 2B	Alpha-amylase 2B	AMY2B	0	0	0.51654	0.521627	0.515774	-0.0334569	0.329355	0.56287	-0.117791	0.000596998	0.226944	1.16e-05	0.199288	2.71364e-05
X12452_32	Histone-lysine N-methyltransferase SUV420H2	SV422	KMT5C	0	0	0.506859	0.536511	0.515767	-0.00460978	0.893119	0.670637	-0.0444021	0.196977	0.0795371	0.128804	0.0692371	0.14847
X7866_11	DnaJ homolog subfamily C member 30	DJC30	DNAJC30	0	0	0.540011	0.52746	0.515752	0.0772495	0.0241396	0.196524	-0.00996745	0.772204	-0.253158	9.26e-07	-0.267972	1.26898e-08
X16850_5	Regulator of G-protein signaling 5	RGS5	RGS5	0	0	0.503197	0.521366	0.515748	-0.0113784	0.740156	0.966392	0.0232397	0.499648	0.0744937	0.154953	-0.0342857	0.474681
X21515_61	Acetoacetyl-CoA synthetase	AACS	AACS	0	0	0.516204	0.52768	0.515741	-0.0258876	0.450458	0.78716	-0.123962	0.000301302	0.0196575	0.707794	0.0604217	0.207445
X6986_17	Heparan sulfate glucosamine 3-O-sulfotransferase 3B1	HS3SB	HS3ST3B1	0	0	0.520069	0.504702	0.515733	0.0365424	0.286683	0.191432	-0.0660176	0.0549275	0.028461	0.58731	0.0970512	0.0425818
X16597_11	Glutaredoxin-related protein 5, mitochondrial	GLRX5	GLRX5	0	0	0.524695	0.545226	0.515707	-0.0430446	0.209417	0.91771	-0.030405	0.377097	0.123356	0.018231	0.131889	0.00575781
X6467_65	Protein O-glucosyltransferase 1	KTEL1	POGLUT1	0	0	0.51919	0.526251	0.515707	-0.0314145	0.359751	0.935485	-0.0764374	0.0262003	0.0231212	0.6593	0.0889019	0.0633382
X23646_5	Aryl-hydrocarbon-interacting protein-like 1	AIPL1	AIPL1	0	0	0.51389	0.513771	0.515689	-0.0127573	0.71001	0.0747306	-0.0246278	0.474378	-0.0131334	0.802272	0.000449192	0.992529
X5486_73	Intercellular adhesion molecule 2	sICAM-2	ICAM2	0	0	0.559967	0.544742	0.515681	-0.104995	0.00214992	0.0294534	-0.0155124	0.65231	0.21383	3.71e-05	0.192693	5.02018e-05
X17792_158	Succinate-semialdehyde dehydrogenase, mitochondrial	SSDH	ALDH5A1	0	0	0.55143	0.525726	0.515674	0.0916468	0.0074331	0.0706973	-0.124376	0.00028744	-0.00941666	0.857515	0.0153283	0.749323
X23203_3	Retinoid-inducible serine carboxypeptidase	RISC	SCPEP1	0	0	0.520081	0.522986	0.515674	0.0299742	0.382211	0.74829	0.170785	5.83e-07	-0.179305	0.000567805	-0.212016	7.80976e-06
X10528_2	Dipeptidase 1	DPEP1	DPEP1	0	0	0.51023	0.506984	0.515655	-0.0237903	0.487999	0.683464	0.0075322	0.826836	0.182723	0.00044247	0.0895035	0.0615639
X3202_28	Kremen protein 2	KREM2	KREMEN2	0	0	0.511604	0.502457	0.51564	0.026045	0.447708	0.604801	0.139851	4.47e-05	-0.127531	0.014629	-0.354168	2.32443e-14
X22397_2	X-box-binding protein 1	XBP1	XBP1	0	0	0.504872	0.506541	0.515636	-0.00758867	0.824949	0.606814	0.036606	0.287551	-0.0182773	0.727465	-0.0302577	0.528134
X14103_12	Tryptase gamma	TPSG1	TPSG1	0	0	0.516221	0.510365	0.515625	0.0291983	0.394658	0.140335	0.0468542	0.173344	-0.0834312	0.111059	-0.105766	0.0270461
X24907_3	Mitochondrial-processing peptidase subunit alpha	MPPA	PMPCA	0	0	0.580534	0.534199	0.515618	-0.136517	6.39652e-05	0.00415404	-0.0549521	0.110224	0.183166	0.000428271	0.280873	2.29522e-09
X17737_7	Isovaleryl-CoA dehydrogenase, mitochondrial	IVD	IVD	0	0	0.510438	0.520618	0.515614	-0.00836011	0.807487	0.155962	0.0818656	0.0172363	-0.0880481	0.0925755	-0.0432823	0.366723
X13511_29	DNA-binding protein SATB1	SATB1	SATB1	0	0	0.506478	0.502316	0.515573	-0.00640721	0.851859	0.627976	0.0336252	0.328641	-0.00633535	0.903858	-0.109719	0.0217914
X6918_183	Cholecystokinin	CCKN	CCK	0	0	0.571673	0.523585	0.515566	-0.115693	0.000716007	0.002969	-0.0186437	0.588151	0.0630108	0.229155	0.170812	0.000334616
X3415_61	Bone sialoprotein 2	BSP	IBSP	0	0	0.520278	0.502096	0.515558	0.0320534	0.350059	0.786229	0.00981081	0.775688	0.0147964	0.777852	0.0816933	0.0880597
X22787_39	Sperm protein associated with the nucleus on the X chromosome N3	SPXN3	SPANXN3	0	0	0.506804	0.509289	0.515547	0.0033136	0.923061	0.820822	-0.0486657	0.157291	-0.0151016	0.773394	0.00609521	0.898898
X21450_333	Caspase-10:region 2	Caspase-10:region 2	CASP10	0	0	0.557971	0.505771	0.515525	-0.101456	0.00302962	0.00856995	0.0559487	0.103908	0.00372378	0.9434	0.0525242	0.273252
X3499_77	Interleukin-17B	IL-17B	IL17B	0	0	0.510739	0.503194	0.515517	-0.0238042	0.487745	0.538911	-0.0521425	0.129669	0.139547	0.00750312	0.173871	0.000260061
X4188_1	Aflatoxin B1 aldehyde reductase member 2	Aflatoxin B1 aldehyde reductase	AKR7A2	0	0	0.510424	0.531418	0.51551	-0.025891	0.450399	0.651224	0.0688861	0.0451727	0.048986	0.35004	-0.0792345	0.0980833
X18198_51	Hemoglobin subunit theta-1	HBAT	HBQ1	0	0	0.523327	0.516534	0.515499	-0.0447612	0.1918	0.201392	-0.031236	0.364189	0.112266	0.0317759	0.1427	0.00279108
X7885_17	Complement factor H-related protein 5	complement factor H-related 5	CFHR5	0	0	0.528314	0.517777	0.515491	-0.0527424	0.123973	0.113409	0.0132147	0.701117	0.192378	0.000213517	0.222413	2.6652e-06
X6256_9	Lymphocyte antigen 6 complex locus protein G6c	LY66C	LY6G6C	0	0	0.529278	0.538856	0.515487	-0.0565271	0.0991746	0.609421	-0.0487765	0.156348	0.147998	0.00454931	0.138428	0.00373817
X6517_14	Growth/differentiation factor 10	BMP-3b	GDF10	0	0	0.509359	0.519754	0.51548	0.0228264	0.505802	0.0407797	-0.0915486	0.00771143	-0.000887668	0.986497	-0.00631399	0.895289
X22842_85	Zinc finger protein 69	ZNF69	ZNF69	0	0	0.512472	0.509646	0.51548	0.0340368	0.321037	0.384011	0.0628275	0.0677738	-0.0831544	0.112253	-0.0850869	0.0755958
X19774_8	Hemoglobin subunit gamma-2	HBG2	HBG2	0	0	0.539777	0.500525	0.515473	-0.0753366	0.0278851	0.42708	-0.022804	0.507725	0.111006	0.0337558	0.0969752	0.0427448
X6238_55	Pregnancy-specific beta-1-glycoprotein 8	PSG8	PSG8	0	0	0.518692	0.523376	0.51545	0.0209614	0.541192	0.499934	0.0434632	0.206625	-0.073425	0.160977	-0.152132	0.00142405
X9936_27	E3 ubiquitin-protein ligase LNX	LNX1	LNX1	0	0	0.503113	0.504214	0.515447	-9.87087e-05	0.997705	0.8567	0.0431042	0.210402	0.0168793	0.747575	-0.047403	0.322832
X15540_6	Vimentin	Vimentin	VIM	0	0	0.548256	0.515078	0.515432	-0.090091	0.00850936	0.0840877	-0.145237	2.23e-05	0.400691	1.51e-15	0.452603	1.86491e-23
X5584_21	Holo-Transcobalamin-2	Holo-TC II	TCN2	0	0	0.506437	0.509851	0.515424	0.0108267	0.752331	0.972767	-0.021019	0.541516	0.141429	0.00672661	0.055011	0.251152
X6494_60	Sperm acrosome-associated protein 5	sperm acrosome associated 5	SPACA5	0	0	0.515212	0.519229	0.51542	0.0206726	0.546781	0.602878	-0.0554591	0.106974	-0.0442823	0.398286	-0.0216061	0.652404
X4383_97	Inhibin beta A chain:Inhibin beta B chain heterodimer	Activin AB	INHBA|INHBB	0	0	0.518423	0.520986	0.515417	-0.0364421	0.288009	0.412476	0.000312322	0.992763	0.115496	0.0271464	0.0651115	0.174251
X13655_34	Nucleolin	Nucleolin	NCL	0	0	0.530889	0.503533	0.515417	0.0627808	0.067007	0.0322506	0.124031	0.000298931	-0.137385	0.00849282	-0.142215	0.00288647
X13122_19	Leucine-rich repeat transmembrane protein FLRT2	FLRT2	FLRT2	0	-0.0388657	0.525572	0.526198	0.515413	-0.0490021	0.15298	0.302157	-0.104178	0.00241413	0.167808	0.00127185	0.204635	1.62328e-05
X13978_122	T-box transcription factor TBX3	Tbx3	TBX3	0	0	0.514431	0.509616	0.515413	0.022598	0.51007	0.95137	-0.0676797	0.0490815	-0.00135226	0.979431	-0.0302434	0.52833
X4989_7	Fibrinogen gamma chain	Fibrinogen g-chain dimer	FGG	0	0	0.53649	0.504885	0.515413	0.0672228	0.0498199	0.68498	-0.0810803	0.0183387	0.145965	0.00514338	0.204602	1.62846e-05
X6380_23	Peptidyl-tRNA hydrolase ICT1, mitochondrial	ICT1	MRPL58	0	0	0.523492	0.515919	0.515406	-0.0422289	0.218188	0.720988	-0.0535621	0.119536	0.207881	6.14e-05	0.254221	7.1273e-08
X17857_6	Long-chain specific acyl-CoA dehydrogenase, mitochondrial	ACADL	ACADL	0	0	0.533458	0.531381	0.515402	-0.056425	0.0997874	0.401369	-0.0762387	0.0265934	-0.0434187	0.407558	0.027167	0.571128
X25938_13	Neurogenin-3	NGN3	NEUROG3	0	0	0.532888	0.521913	0.51538	-0.0505471	0.140428	0.0204676	-0.07044	0.0405268	0.0995372	0.0571095	0.144582	0.00244792
X11231_12	Adrenodoxin-like protein, mitochondrial	ADXL	FDX2	0	0	0.536806	0.500156	0.515372	0.064786	0.0587245	0.489665	0.000810168	0.981228	-0.00259442	0.960549	-0.0212018	0.658493
X15462_28	T-cell surface glycoprotein CD8 alpha chain	CD8A	CD8A	0	0	0.520729	0.539139	0.515368	-0.0529266	0.122664	0.00796251	-0.053783	0.118016	0.117543	0.0245232	0.211201	8.47786e-06
X13618_15	Mitotic spindle assembly checkpoint protein MAD1	MD1L1	MAD1L1	0	0	0.513765	0.516575	0.515353	0.0339375	0.322451	0.162114	0.13929	4.8e-05	-0.217283	2.75e-05	-0.224018	2.24702e-06
X12811_55	Zinc finger protein 415	ZN415	ZNF415	0	0	0.500694	0.528388	0.515335	0.021866	0.523874	0.00442351	-0.0273355	0.427163	-0.181361	0.000488977	-0.0660394	0.16818
X15511_37	Neuronal pentraxin receptor	NPTXR	NPTXR	0	-0.0388657	0.549127	0.504795	0.51532	-0.0831404	0.0152062	0.0468007	-0.0144008	0.675754	-0.0542832	0.300338	-0.0106865	0.82372
X8872_1	Protein transport protein Sec61 subunit gamma	SC61G	SEC61G	0	0	0.528152	0.540606	0.515309	0.0426702	0.213411	0.488101	0.0602181	0.0800306	-0.116715	0.0255559	-0.145613	0.00227676
X20948_16	U8 snoRNA-decapping enzyme	NUD16	NUDT16	0	0	0.512686	0.509929	0.515309	0.014865	0.66481	0.168076	-0.0407175	0.236789	0.00859334	0.869856	-0.0812645	0.0897459
X18392_19	Methionine adenosyltransferase 2 subunit beta	MAT2B	MAT2B	0	0	0.509735	0.569132	0.515301	0.0157808	0.645532	0.986247	-0.168355	8.45e-07	0.125888	0.0159645	0.140808	0.00317983
X20427_18	Mediator of RNA polymerase II transcription subunit 20	MED20	MED20	0	0	0.508187	0.511649	0.515298	0.0250881	0.464573	0.00184108	0.112423	0.00105477	-0.148067	0.0045303	-0.0697962	0.145211
[truncated: 5,009 more rows]

## Sheet: Table_2
Model protein analyte	correalted protein analyte	spearman correaltion	pval	Model Protein Model Weight
X12387_7	X9997_12	0.721013	3.32366e-138	-0.0214538
X18930_28	X9981_18	0.773057	5.35245e-171	-0.0388657
X19787_14	X9981_18	0.76067	1.95235e-162	0.0158851
X10351_51	X9981_18	0.815592	4.10339e-205	0.00771988
X4859_6	X9981_18	0.70628	3.01807e-130	0.00603823
X25259_7	X9981_18	0.728657	1.53899e-142	0.00453564
X18930_28	X9971_5	0.712927	8.94523e-134	-0.0388657
X23176_17	X9971_5	0.727703	5.44637e-142	0.0158498
X25259_7	X9971_5	0.744931	2.78963e-152	0.00453564
X8225_86	X9971_5	0.723303	1.73244e-139	0.00294911
X18930_28	X9959_60	0.713678	3.52021e-134	-0.0388657
X23176_17	X9959_60	0.73995	3.19683e-149	0.0158498
X25259_7	X9959_60	0.743566	1.95384e-151	0.00453564
X8225_86	X9959_60	0.769384	2.10601e-168	0.00294911
X18930_28	X9934_29	0.712018	2.75405e-133	-0.0388657
X16885_49	X9934_29	0.784645	1.6261e-179	-0.0158848
X18930_28	X9883_29	0.796668	6.25348e-189	-0.0388657
X15474_7	X9883_29	0.709776	4.33279e-132	-0.00527846
X8225_86	X9883_29	0.738319	3.10081e-148	0.00294911
X5694_57	X9877_28	0.735522	1.46591e-146	-0.0643914
X18930_28	X9877_28	0.752132	7.83899e-157	-0.0388657
X12387_7	X9877_28	0.71737	3.44422e-136	-0.0214538
X16885_49	X9877_28	0.772084	2.63597e-170	-0.0158848
X15474_7	X9877_28	0.794297	5.04265e-187	-0.00527846
X8225_86	X9877_28	0.721119	2.90232e-138	0.00294911
X12387_7	X9870_17	0.76482	3.02608e-165	-0.0214538
X12387_7	X9846_32	0.728218	2.7546e-142	-0.0214538
X12387_7	X9831_12	0.741358	4.43909e-150	-0.0214538
X18930_28	X9826_135	0.757321	3.2835e-160	-0.0388657
X8225_86	X9826_135	0.737556	8.91908e-148	0.00294911
X12387_7	X9815_5	0.722785	3.38976e-139	-0.0214538
X18930_28	X9789_52	0.716287	1.34784e-135	-0.0388657
X25259_7	X9789_52	0.70616	3.4884e-130	0.00453564
X18930_28	X9772_153	0.723815	8.91221e-140	-0.0388657
X19787_14	X9772_153	0.747142	1.16076e-153	0.0158851
X25259_7	X9772_153	0.757824	1.5299e-160	0.00453564
X8225_86	X9772_153	0.711429	5.69988e-133	0.00294911
X18930_28	X9769_48	0.738453	2.57479e-148	-0.0388657
X19787_14	X9769_48	0.706267	3.06653e-130	0.0158851
X23176_17	X9769_48	0.821187	2.92964e-210	0.0158498
X8407_84	X9769_48	0.744074	9.48625e-152	0.00962253
X25259_7	X9769_48	0.745217	1.85217e-152	0.00453564
X8225_86	X9769_48	0.8517	6.84597e-242	0.00294911
X12387_7	X9762_14	0.732694	6.886e-145	-0.0214538
X5694_57	X9738_7	0.715479	3.71701e-135	-0.0643914
X18930_28	X9738_7	0.733749	1.64558e-145	-0.0388657
X16885_49	X9738_7	0.755952	2.60681e-159	-0.0158848
X15474_7	X9738_7	0.730437	1.43425e-143	-0.00527846
X8225_86	X9738_7	0.741479	3.74528e-150	0.00294911
X18930_28	X9719_145	0.774704	3.53961e-172	-0.0388657
X23176_17	X9719_145	0.710818	1.208e-132	0.0158498
X25259_7	X9719_145	0.712457	1.60218e-133	0.00453564
X8225_86	X9719_145	0.75325	1.49223e-157	0.00294911
X18930_28	X9715_15	0.73977	4.1108e-149	-0.0388657
X19787_14	X9715_15	0.739956	3.17045e-149	0.0158851
X10351_51	X9715_15	0.80672	2.64776e-197	0.00771988
X4859_6	X9715_15	0.711164	7.89111e-133	0.00603823
X25259_7	X9715_15	0.714118	2.03624e-134	0.00453564
X18930_28	X9599_6	0.700334	3.56946e-127	-0.0388657
X13388_57	X9599_6	0.720628	5.45236e-138	0.0167377
X8225_86	X9599_6	0.792797	7.86165e-186	0.00294911
X18930_28	X9595_11	0.747404	7.95019e-154	-0.0388657
X23176_17	X9595_11	0.741626	3.04471e-150	0.0158498
X25259_7	X9595_11	0.800731	2.94859e-192	0.00453564
X8225_86	X9595_11	0.759647	9.43846e-162	0.00294911
X5694_57	X9557_5	0.713601	3.87656e-134	-0.0643914
X18930_28	X9557_5	0.763496	2.41839e-164	-0.0388657
X13388_57	X9557_5	0.703529	8.14881e-129	0.0167377
X23176_17	X9557_5	0.808842	3.91153e-199	0.0158498
X8407_84	X9557_5	0.757313	3.3273e-160	0.00962253
X25259_7	X9557_5	0.768742	5.91723e-168	0.00453564
X8225_86	X9557_5	0.87332	5.71049e-269	0.00294911
X18930_28	X9511_61	0.775332	1.25042e-172	-0.0388657
X19787_14	X9511_61	0.76414	8.81867e-165	0.0158851
X23176_17	X9511_61	0.705004	1.39781e-129	0.0158498
X10351_51	X9511_61	0.733546	2.16961e-145	0.00771988
X25259_7	X9511_61	0.774062	1.02264e-171	0.00453564
X8225_86	X9511_61	0.723179	2.03567e-139	0.00294911
X23176_17	X9509_4	0.75437	2.80399e-158	0.0158498
X25259_7	X9509_4	0.744429	5.72187e-152	0.00453564
X8225_86	X9509_4	0.719637	1.93493e-137	0.00294911
X18930_28	X9506_10	0.740797	9.77152e-150	-0.0388657
X19787_14	X9506_10	0.724181	5.53531e-140	0.0158851
X10351_51	X9506_10	0.767134	7.75319e-167	0.00771988
X8225_86	X9468_8	0.779975	5.08016e-176	0.00294911
X4859_6	X9416_77	0.715605	3.17534e-135	0.00603823
X18930_28	X9391_60	0.701056	1.52579e-127	-0.0388657
X23176_17	X9391_60	0.724884	2.21262e-140	0.0158498
X25259_7	X9391_60	0.82572	1.46012e-214	0.00453564
X8225_86	X9391_60	0.749027	7.51766e-155	0.00294911
X18930_28	X9369_174	0.802038	2.41677e-193	-0.0388657
X19787_14	X9369_174	0.733873	1.39173e-145	0.0158851
X10351_51	X9369_174	0.821944	5.7104e-211	0.00771988
X4859_6	X9369_174	0.72538	1.15764e-140	0.00603823
X18930_28	X9361_7	0.709691	4.80705e-132	-0.0388657
X23176_17	X9361_7	0.740596	1.29486e-149	0.0158498
X8225_86	X9361_7	0.756472	1.18808e-159	0.00294911
X18930_28	X9359_9	0.746213	4.4364e-153	-0.0388657
X13388_57	X9359_9	0.709435	6.57091e-132	0.0167377
X19787_14	X9359_9	0.718241	1.14314e-136	0.0158851
X23176_17	X9359_9	0.80443	2.36309e-195	0.0158498
X8407_84	X9359_9	0.764565	4.52268e-165	0.00962253
X25259_7	X9359_9	0.782967	2.99879e-178	0.00453564
X8225_86	X9359_9	0.857841	4.01124e-249	0.00294911
X18930_28	X9350_3	0.731108	5.8332e-144	-0.0388657
X19787_14	X9350_3	0.744284	7.03087e-152	0.0158851
X10351_51	X9350_3	0.794158	6.5048e-187	0.00771988
X25259_7	X9350_3	0.759688	8.85321e-162	0.00453564
X25259_7	X9340_17	0.720391	7.38125e-138	0.00453564
X18930_28	X9305_89	0.750885	4.94399e-156	-0.0388657
X10351_51	X9305_89	0.70283	1.87149e-128	0.00771988
X5694_57	X9296_15	0.712934	8.86748e-134	-0.0643914
X18930_28	X9296_15	0.795345	7.29526e-188	-0.0388657
X19787_14	X9296_15	0.728478	1.9521e-142	0.0158851
X23176_17	X9296_15	0.797408	1.56953e-189	0.0158498
X8407_84	X9296_15	0.75394	5.33454e-158	0.00962253
X25259_7	X9296_15	0.801047	1.61487e-192	0.00453564
X8225_86	X9296_15	0.856724	8.8034e-248	0.00294911
X18930_28	X9261_14	0.806944	1.70255e-197	-0.0388657
X13388_57	X9261_14	0.776698	1.2808e-173	0.0167377
X23176_17	X9261_14	0.779855	6.22965e-176	0.0158498
X25259_7	X9261_14	0.742403	1.01695e-150	0.00453564
X8225_86	X9261_14	0.863125	1.26847e-255	0.00294911
X18930_28	X9259_35	0.803329	2.003e-194	-0.0388657
X13388_57	X9259_35	0.755704	3.78627e-159	0.0167377
X19787_14	X9259_35	0.708836	1.36438e-131	0.0158851
X23176_17	X9259_35	0.813623	2.41235e-203	0.0158498
X8407_84	X9259_35	0.732859	5.50551e-145	0.00962253
X25259_7	X9259_35	0.75504	1.02751e-158	0.00453564
X8225_86	X9259_35	0.886536	4.17899e-288	0.00294911
X18930_28	X9249_17	0.731601	3.00544e-144	-0.0388657
X23176_17	X9249_17	0.736229	5.55562e-147	0.0158498
X8225_86	X9249_17	0.772259	1.98013e-170	0.00294911
X8225_86	X9234_8	0.702378	3.19609e-128	0.00294911
X23176_17	X9232_1	0.704316	3.18632e-129	0.0158498
X8407_84	X9232_1	0.701278	1.17455e-127	0.00962253
X8225_86	X9232_1	0.735647	1.23418e-146	0.00294911
X18930_28	X9231_23	0.725415	1.10495e-140	-0.0388657
X23176_17	X9231_23	0.777964	1.52961e-174	0.0158498
X8407_84	X9231_23	0.723495	1.34961e-139	0.00962253
X25259_7	X9231_23	0.800842	2.38462e-192	0.00453564
X8225_86	X9231_23	0.781858	2.02981e-177	0.00294911
X18930_28	X9220_7	0.721799	1.2107e-138	-0.0388657
X19787_14	X9220_7	0.712308	1.92586e-133	0.0158851
X23176_17	X9220_7	0.736686	2.96424e-147	0.0158498
X8407_84	X9220_7	0.724063	6.45519e-140	0.00962253
X25259_7	X9220_7	0.7471	1.23332e-153	0.00453564
X8225_86	X9220_7	0.777287	4.7792e-174	0.00294911
X19787_14	X9182_3	0.712646	1.26794e-133	0.0158851
X10351_51	X9182_3	0.709078	1.01587e-131	0.00771988
X18930_28	X9180_6	0.744877	3.01411e-152	-0.0388657
X19787_14	X9180_6	0.703809	5.83795e-129	0.0158851
X10351_51	X9180_6	0.705541	7.34304e-130	0.00771988
X23176_17	X9176_3	0.71373	3.30018e-134	0.0158498
X8225_86	X9176_3	0.769691	1.28265e-168	0.00294911
X18930_28	X9175_48	0.73625	5.40029e-147	-0.0388657
X19787_14	X9175_48	0.741919	2.0136e-150	0.0158851
X10351_51	X9175_48	0.743136	3.59781e-151	0.00771988
X25259_7	X9175_48	0.742532	8.47546e-151	0.00453564
X8225_86	X9175_48	0.704892	1.59958e-129	0.00294911
X18930_28	X9171_11	0.761567	4.87606e-163	-0.0388657
X5694_57	X9169_14	0.784156	3.80727e-179	-0.0643914
X18930_28	X9169_14	0.819043	2.88282e-208	-0.0388657
X13118_5	X9169_14	0.706006	4.19887e-130	-0.035346
X16885_49	X9169_14	0.713047	7.71293e-134	-0.0158848
X23176_17	X9169_14	0.758873	3.08635e-161	0.0158498
X8407_84	X9169_14	0.734592	5.22394e-146	0.00962253
X15474_7	X9169_14	0.784433	2.35283e-179	-0.00527846
X8225_86	X9169_14	0.826533	2.39581e-215	0.00294911
X18930_28	X9126_171	0.714392	1.44712e-134	-0.0388657
X5694_57	X9099_19	0.751494	2.01544e-156	-0.0643914
X18930_28	X9099_19	0.805139	5.92372e-196	-0.0388657
X16885_49	X9099_19	0.70843	2.23517e-131	-0.0158848
X15474_7	X9099_19	0.718302	1.05804e-136	-0.00527846
X8225_86	X9099_19	0.736637	3.17183e-147	0.00294911
X18930_28	X9077_10	0.712599	1.3437e-133	-0.0388657
X23176_17	X9077_10	0.733281	3.106e-145	0.0158498
X8407_84	X9077_10	0.701163	1.34517e-127	0.00962253
X25259_7	X9077_10	0.756361	1.40655e-159	0.00453564
X8225_86	X9077_10	0.763987	1.12233e-164	0.00294911
X5694_57	X9038_12	0.700933	1.76463e-127	-0.0643914
X18930_28	X9038_12	0.729452	5.34574e-143	-0.0388657
X19787_14	X9038_12	0.705195	1.11185e-129	0.0158851
X23176_17	X9038_12	0.78862	1.4673e-182	0.0158498
X8407_84	X9038_12	0.749826	2.33817e-155	0.00962253
X25259_7	X9038_12	0.775757	6.16045e-173	0.00453564
X8225_86	X9038_12	0.797385	1.64012e-189	0.00294911
X18930_28	X9018_38	0.768496	8.78455e-168	-0.0388657
X13388_57	X9018_38	0.723084	2.30033e-139	0.0167377
X23176_17	X9018_38	0.798349	2.6845e-190	0.0158498
X25259_7	X9018_38	0.708646	1.71983e-131	0.00453564
X8225_86	X9018_38	0.883055	7.67268e-283	0.00294911
X18930_28	X9005_16	0.83714	5.57833e-226	-0.0388657
X13388_57	X9005_16	0.702738	2.08727e-128	0.0167377
X19787_14	X9005_16	0.75703	5.11064e-160	0.0158851
X23176_17	X9005_16	0.746844	1.78492e-153	0.0158498
X10351_51	X9005_16	0.767957	2.08372e-167	0.00771988
X25259_7	X9005_16	0.753439	1.12563e-157	0.00453564
X8225_86	X9005_16	0.82578	1.27874e-214	0.00294911
X10351_51	X8997_4	0.728191	2.85708e-142	0.00771988
X8225_86	X8997_4	0.702687	2.21555e-128	0.00294911
X18930_28	X8983_7	0.750324	1.12642e-155	-0.0388657
X19787_14	X8983_7	0.721469	1.85008e-138	0.0158851
X25259_7	X8983_7	0.734186	9.08148e-146	0.00453564
X18930_28	X8975_26	0.751755	1.36942e-156	-0.0388657
X25259_7	X8971_9	0.71341	4.91454e-134	0.00453564
X5694_57	X8963_8	0.743984	1.07886e-151	-0.0643914
X18930_28	X8963_8	0.799209	5.30862e-191	-0.0388657
X23176_17	X8963_8	0.749199	5.84809e-155	0.0158498
X15474_7	X8963_8	0.732143	1.44905e-144	-0.00527846
X8225_86	X8963_8	0.781507	3.70808e-177	0.00294911
X23176_17	X8957_72	0.763238	3.62469e-164	0.0158498
X8407_84	X8957_72	0.701508	8.94672e-128	0.00962253
X25259_7	X8957_72	0.730598	1.15579e-143	0.00453564
X8225_86	X8957_72	0.797912	6.10856e-190	0.00294911
X23176_17	X8924_55	0.703849	5.56258e-129	0.0158498
X25259_7	X8924_55	0.872396	1.02996e-267	0.00453564
X18930_28	X8906_60	0.808026	1.99173e-198	-0.0388657
X13388_57	X8906_60	0.761608	4.57598e-163	0.0167377
X19787_14	X8906_60	0.714342	1.54149e-134	0.0158851
X23176_17	X8906_60	0.754237	3.42307e-158	0.0158498
X10351_51	X8906_60	0.728558	1.75457e-142	0.00771988
X25259_7	X8906_60	0.739637	4.95364e-149	0.00453564
X8225_86	X8906_60	0.849731	1.21605e-239	0.00294911
X5694_57	X8901_40	0.778385	7.5216e-175	-0.0643914
X18930_28	X8901_40	0.850521	1.53828e-240	-0.0388657
X16885_49	X8901_40	0.753201	1.60632e-157	-0.0158848
X23176_17	X8901_40	0.71193	3.07089e-133	0.0158498
X15474_7	X8901_40	0.808723	4.95994e-199	-0.00527846
X8225_86	X8901_40	0.796541	7.92908e-189	0.00294911
X5694_57	X8900_28	0.701106	1.43831e-127	-0.0643914
X18930_28	X8900_28	0.806754	2.47845e-197	-0.0388657
X19787_14	X8900_28	0.774683	3.66431e-172	0.0158851
X23176_17	X8900_28	0.806575	3.53092e-197	0.0158498
X8407_84	X8900_28	0.749554	3.48061e-155	0.00962253
X25259_7	X8900_28	0.775089	1.86909e-172	0.00453564
X8225_86	X8900_28	0.862727	4.00109e-255	0.00294911
X18930_28	X8890_9	0.815288	7.71436e-205	-0.0388657
X13388_57	X8890_9	0.769664	1.34044e-168	0.0167377
X23176_17	X8890_9	0.751017	4.06749e-156	0.0158498
X25259_7	X8890_9	0.737321	1.2344e-147	0.00453564
X8225_86	X8890_9	0.838512	2.06545e-227	0.00294911
X12387_7	X8887_21	0.712678	1.21869e-133	-0.0214538
X18930_28	X8885_6	0.79066	3.78393e-184	-0.0388657
X13388_57	X8885_6	0.770993	1.55886e-169	0.0167377
X23176_17	X8885_6	0.762393	1.35277e-163	0.0158498
X25259_7	X8885_6	0.716412	1.15298e-135	0.00453564
X8225_86	X8885_6	0.847845	1.61972e-237	0.00294911
X18930_28	X8866_53	0.785817	2.08958e-180	-0.0388657
X19787_14	X8866_53	0.71867	6.62946e-137	0.0158851
X23176_17	X8866_53	0.747822	4.33918e-154	0.0158498
X25259_7	X8866_53	0.817694	5.01506e-207	0.00453564
X8225_86	X8866_53	0.761977	2.58157e-163	0.00294911
X10351_51	X8859_51	0.718081	1.39994e-136	0.00771988
X18930_28	X8851_42	0.730398	1.51168e-143	-0.0388657
X19787_14	X8851_42	0.739605	5.17619e-149	0.0158851
X10351_51	X8851_42	0.765686	7.72356e-166	0.00771988
X4859_6	X8851_42	0.701385	1.03549e-127	0.00603823
X25259_7	X8851_42	0.727325	8.98082e-142	0.00453564
X23176_17	X8811_24	0.791214	1.39293e-184	0.0158498
X8225_86	X8811_24	0.858964	1.75512e-250	0.00294911
X18930_28	X8786_6	0.76144	5.94231e-163	-0.0388657
X19787_14	X8786_6	0.74183	2.2824e-150	0.0158851
X10351_51	X8786_6	0.792033	3.1556e-185	0.00771988
X4859_6	X8786_6	0.718473	8.5104e-137	0.00603823
X25259_7	X8786_6	0.738106	4.16685e-148	0.00453564
X25259_7	X8778_3	0.765221	1.6084e-165	0.00453564
X10351_51	X8697_38	0.745503	1.2292e-152	0.00771988
X4859_6	X8697_38	0.730951	7.19965e-144	0.00603823
X25259_7	X8687_26	0.741957	1.90808e-150	0.00453564
X8225_86	X8687_26	0.710289	2.31173e-132	0.00294911
X18930_28	X8624_16	0.782011	1.55941e-177	-0.0388657
X13388_57	X8624_16	0.764325	6.6005e-165	0.0167377
X23176_17	X8624_16	0.781982	1.63944e-177	0.0158498
X8407_84	X8624_16	0.711532	5.01661e-133	0.00962253
X25259_7	X8624_16	0.730196	1.9784e-143	0.00453564
X8225_86	X8624_16	0.86441	3.02838e-257	0.00294911
X18930_28	X8528_74	0.838807	1.01445e-227	-0.0388657
X13388_57	X8528_74	0.746896	1.65544e-153	0.0167377
X19787_14	X8528_74	0.711616	4.5238e-133	0.0158851
X23176_17	X8528_74	0.777741	2.22755e-174	0.0158498
X8407_84	X8528_74	0.721203	2.60432e-138	0.00962253
X25259_7	X8528_74	0.761369	6.62681e-163	0.00453564
X8225_86	X8528_74	0.866364	9.61792e-260	0.00294911
X18930_28	X8476_11	0.765528	9.91744e-166	-0.0388657
X13388_57	X8476_11	0.759681	8.94708e-162	0.0167377
X23176_17	X8476_11	0.731779	2.36679e-144	0.0158498
X25259_7	X8476_11	0.747993	3.38175e-154	0.00453564
X8225_86	X8476_11	0.77982	6.61046e-176	0.00294911
X18930_28	X8474_6	0.720599	5.65265e-138	-0.0388657
X8225_86	X8474_6	0.716373	1.21079e-135	0.00294911
X8225_86	X8459_10	0.74036	1.80282e-149	0.00294911
X8225_86	X8428_102	0.766326	2.7992e-166	0.00294911
X18930_28	X8427_118	0.723613	1.15862e-139	-0.0388657
X25259_7	X8427_118	0.716279	1.36138e-135	0.00453564
X8225_86	X8427_118	0.740257	2.0812e-149	0.00294911
X8225_86	X8407_84	0.720432	7.0024e-138	0.00294911
X5694_57	X8358_30	0.745338	1.55726e-152	-0.0643914
X18930_28	X8358_30	0.820394	1.61191e-209	-0.0388657
X8225_86	X8358_30	0.738716	1.78633e-148	0.00294911
X5694_57	X8353_15	0.736041	7.1934e-147	-0.0643914
X18930_28	X8353_15	0.843739	5.46376e-233	-0.0388657
X19787_14	X8353_15	0.739821	3.83049e-149	0.0158851
X23176_17	X8353_15	0.80062	3.64755e-192	0.0158498
X8407_84	X8353_15	0.750012	1.78137e-155	0.00962253
X25259_7	X8353_15	0.746164	4.75409e-153	0.00453564
X8225_86	X8353_15	0.837006	7.6931e-226	0.00294911
X18930_28	X8348_4	0.731219	5.02178e-144	-0.0388657
X23176_17	X8348_4	0.772063	2.7268e-170	0.0158498
X8225_86	X8348_4	0.973419	0	0.00294911
X18930_28	X8330_1	0.808701	5.19073e-199	-0.0388657
X19787_14	X8330_1	0.742021	1.74451e-150	0.0158851
X23176_17	X8330_1	0.756266	1.62342e-159	0.0158498
X10351_51	X8330_1	0.718314	1.04236e-136	0.00771988
X25259_7	X8330_1	0.826549	2.30823e-215	0.00453564
X8225_86	X8330_1	0.766212	3.35294e-166	0.00294911
X16885_49	X8307_47	0.714135	1.99372e-134	-0.0158848
X15474_7	X8307_47	0.72565	8.12542e-141	-0.00527846
X5694_57	X8300_82	0.715399	4.11188e-135	-0.0643914
X18930_28	X8300_82	0.78304	2.64223e-178	-0.0388657
X8225_86	X8300_82	0.748737	1.14708e-154	0.00294911
X5694_57	X8274_64	0.761366	6.66519e-163	-0.0643914
X18930_28	X8274_64	0.773033	5.56602e-171	-0.0388657
X16885_49	X8274_64	0.724535	3.48899e-140	-0.0158848
X23176_17	X8274_64	0.744861	3.0842e-152	0.0158498
X8407_84	X8274_64	0.71852	8.02458e-137	0.00962253
X15474_7	X8274_64	0.747198	1.07051e-153	-0.00527846
X8225_86	X8274_64	0.771637	5.46383e-170	0.00294911
X18930_28	X8264_43	0.712446	1.62258e-133	-0.0388657
X23176_17	X8264_43	0.778635	4.93575e-175	0.0158498
X25259_7	X8264_43	0.733594	2.03328e-145	0.00453564
X8225_86	X8264_43	0.824544	1.95955e-213	0.00294911
X18930_28	X8250_2	0.827	8.44612e-216	-0.0388657
X13388_57	X8250_2	0.7205	6.41794e-138	0.0167377
X19787_14	X8250_2	0.763029	5.02186e-164	0.0158851
X23176_17	X8250_2	0.8006	3.78682e-192	0.0158498
X8407_84	X8250_2	0.740746	1.0492e-149	0.00962253
X10351_51	X8250_2	0.722628	4.15065e-139	0.00771988
X25259_7	X8250_2	0.770119	6.43193e-169	0.00453564
X8225_86	X8250_2	0.860188	5.61656e-252	0.00294911
X18930_28	X8245_27	0.799904	1.42118e-191	-0.0388657
X10351_51	X8245_27	0.714701	9.84598e-135	0.00771988
X8225_86	X8245_27	0.776853	9.87834e-174	0.00294911
X25259_7	X8244_16	0.717069	5.03515e-136	0.00453564
X23176_17	X8242_9	0.711547	4.92723e-133	0.0158498
X8225_86	X8242_9	0.781432	4.21582e-177	0.00294911
X18930_28	X8225_86	0.738675	1.89032e-148	-0.0388657
X23176_17	X8225_86	0.79362	1.74738e-186	0.0158498
X8407_84	X8225_86	0.720432	7.0024e-138	0.00962253
X18930_28	X8053_16	0.762012	2.44569e-163	-0.0388657
X23176_17	X8053_16	0.720906	3.81328e-138	0.0158498
X8407_84	X8053_16	0.708813	1.40335e-131	0.00962253
X25259_7	X8053_16	0.706982	1.29424e-130	0.00453564
X8225_86	X8053_16	0.760397	2.97404e-162	0.00294911
X18930_28	X8052_115	0.769875	9.54009e-169	-0.0388657
X19787_14	X8052_115	0.764314	6.70968e-165	0.0158851
X23176_17	X8052_115	0.70473	1.941e-129	0.0158498
X10351_51	X8052_115	0.724437	3.96863e-140	0.00771988
X4859_6	X8052_115	0.706847	1.52247e-130	0.00603823
X25259_7	X8052_115	0.780763	1.32587e-176	0.00453564
X8225_86	X8052_115	0.735986	7.75249e-147	0.00294911
X18930_28	X8045_3	0.745861	7.35348e-153	-0.0388657
X23176_17	X8045_3	0.843484	1.03376e-232	0.0158498
X8407_84	X8045_3	0.701932	5.42233e-128	0.00962253
X25259_7	X8045_3	0.71339	5.03702e-134	0.00453564
X8225_86	X8045_3	0.863953	1.14955e-256	0.00294911
X23176_17	X8039_41	0.746134	4.96533e-153	0.0158498
X8407_84	X8039_41	0.72628	3.55738e-141	0.00962253
X25259_7	X8039_41	0.769905	9.07833e-169	0.00453564
X8225_86	X8039_41	0.732631	7.48902e-145	0.00294911
X18930_28	X8024_64	0.702671	2.25797e-128	-0.0388657
X23176_17	X8024_64	0.729503	4.99352e-143	0.0158498
X8407_84	X8024_64	0.713781	3.1006e-134	0.00962253
X25259_7	X8024_64	0.759168	1.96694e-161	0.00453564
X8225_86	X8024_64	0.736815	2.48039e-147	0.00294911
X5694_57	X8019_73	0.770476	3.60473e-169	-0.0643914
X18930_28	X8019_73	0.822717	1.06865e-211	-0.0388657
X23176_17	X8019_73	0.769106	3.29339e-168	0.0158498
X15474_7	X8019_73	0.73465	4.82528e-146	-0.00527846
X25259_7	X8019_73	0.747676	5.35877e-154	0.00453564
X8225_86	X8019_73	0.805654	2.15958e-196	0.00294911
X18930_28	X8013_9	0.771302	9.43355e-170	-0.0388657
X19787_14	X8013_9	0.711928	3.07745e-133	0.0158851
X23176_17	X8013_9	0.711413	5.81265e-133	0.0158498
X8407_84	X8013_9	0.705196	1.1102e-129	0.00962253
X25259_7	X8013_9	0.727822	4.65734e-142	0.00453564
X8225_86	X8013_9	0.785219	5.95746e-180	0.00294911
X18930_28	X8006_12	0.743229	3.15558e-151	-0.0388657
X23176_17	X8006_12	0.784688	1.50751e-179	0.0158498
X8407_84	X8006_12	0.709094	9.96644e-132	0.00962253
X25259_7	X8006_12	0.768457	9.34635e-168	0.00453564
X8225_86	X8006_12	0.805166	5.61495e-196	0.00294911
X5694_57	X7997_118	0.727106	1.19828e-141	-0.0643914
X18930_28	X7997_118	0.772994	5.93951e-171	-0.0388657
X15474_7	X7997_118	0.745857	7.39886e-153	-0.00527846
X8225_86	X7997_118	0.707553	6.47906e-131	0.00294911
X18930_28	X7995_16	0.771669	5.18988e-170	-0.0388657
X13388_57	X7995_16	0.70225	3.72079e-128	0.0167377
X19787_14	X7995_16	0.709726	4.60467e-132	0.0158851
X23176_17	X7995_16	0.755762	3.47212e-159	0.0158498
X8407_84	X7995_16	0.713426	4.81598e-134	0.00962253
X25259_7	X7995_16	0.737261	1.34116e-147	0.00453564
X8225_86	X7995_16	0.814915	1.67319e-204	0.00294911
X18930_28	X7980_72	0.777869	1.7949e-174	-0.0388657
X19787_14	X7980_72	0.702156	4.16195e-128	0.0158851
X23176_17	X7980_72	0.797918	6.0434e-190	0.0158498
X8407_84	X7980_72	0.757373	3.03556e-160	0.00962253
X25259_7	X7980_72	0.794209	5.92871e-187	0.00453564
X8225_86	X7980_72	0.842509	1.17155e-231	0.00294911
X5694_57	X7975_97	0.705483	7.8753e-130	-0.0643914
X18930_28	X7975_97	0.814191	7.4865e-204	-0.0388657
X13388_57	X7975_97	0.768128	1.58344e-167	0.0167377
X19787_14	X7975_97	0.70453	2.46714e-129	0.0158851
X23176_17	X7975_97	0.806086	9.24633e-197	0.0158498
X8407_84	X7975_97	0.730718	9.83516e-144	0.00962253
X25259_7	X7975_97	0.77168	5.09202e-170	0.00453564
X8225_86	X7975_97	0.873723	1.60515e-269	0.00294911
X8225_86	X7970_315	0.749154	6.24688e-155	0.00294911
X18930_28	X7959_34	0.710866	1.13929e-132	-0.0388657
X23176_17	X7959_34	0.762204	1.81577e-163	0.0158498
X25259_7	X7959_34	0.769925	8.79204e-169	0.00453564
X8225_86	X7959_34	0.768617	7.23271e-168	0.00294911
X5694_57	X7952_2	0.731798	2.30526e-144	-0.0643914
X18930_28	X7952_2	0.800183	8.36943e-192	-0.0388657
X13388_57	X7952_2	0.71463	1.07544e-134	0.0167377
X23176_17	X7952_2	0.804276	3.19021e-195	0.0158498
X8407_84	X7952_2	0.727599	6.25329e-142	0.00962253
X25259_7	X7952_2	0.725578	8.93454e-141	0.00453564
X8225_86	X7952_2	0.850262	3.03298e-240	0.00294911
X10351_51	X7945_10	0.739796	3.96808e-149	0.00771988
X4859_6	X7945_10	0.786788	3.78149e-181	0.00603823
X25259_7	X7935_26	0.778529	5.89551e-175	0.00453564
X18930_28	X7934_11	0.788049	4.05401e-182	-0.0388657
X19787_14	X7934_11	0.74346	2.27355e-151	0.0158851
X23176_17	X7934_11	0.770294	4.84101e-169	0.0158498
X8407_84	X7934_11	0.718309	1.04793e-136	0.00962253
X25259_7	X7934_11	0.818577	7.75797e-208	0.00453564
X8225_86	X7934_11	0.774353	6.3303e-172	0.00294911
X18930_28	X7933_75	0.716341	1.26069e-135	-0.0388657
X19787_14	X7933_75	0.72331	1.71763e-139	0.0158851
X25259_7	X7933_75	0.741382	4.29361e-150	0.00453564
X8225_86	X7933_75	0.715148	5.62678e-135	0.00294911
X25259_7	X7928_183	0.742087	1.58824e-150	0.00453564
X18930_28	X7927_16	0.745664	9.7567e-153	-0.0388657
X25259_7	X7927_16	0.719316	2.91469e-137	0.00453564
X18930_28	X7917_17	0.707155	1.04888e-130	-0.0388657
X18930_28	X7915_31	0.734546	5.56343e-146	-0.0388657
X19787_14	X7915_31	0.710759	1.29796e-132	0.0158851
X10351_51	X7915_31	0.731975	1.8166e-144	0.00771988
X4859_6	X7915_31	0.734454	6.304e-146	0.00603823
X25259_7	X7915_31	0.725294	1.29569e-140	0.00453564
X18930_28	X7893_19	0.749319	4.91144e-155	-0.0388657
X8225_86	X7893_19	0.727271	9.64198e-142	0.00294911
X23176_17	X7871_16	0.700722	2.2622e-127	0.0158498
X8225_86	X7871_16	0.793142	4.18724e-186	0.00294911
X8225_86	X7870_8	0.728386	2.20562e-142	0.00294911
X23176_17	X7863_50	0.769226	2.71591e-168	0.0158498
X8407_84	X7863_50	0.744441	5.61742e-152	0.00962253
X8225_86	X7863_50	0.816456	6.75744e-206	0.00294911
X23176_17	X7861_9	0.710897	1.09597e-132	0.0158498
X8225_86	X7861_9	0.776042	3.83194e-173	0.00294911
X18930_28	X7849_3	0.760272	3.6091e-162	-0.0388657
X19787_14	X7849_3	0.727213	1.04128e-141	0.0158851
X23176_17	X7849_3	0.700975	1.67867e-127	0.0158498
X8225_86	X7849_3	0.78056	1.87411e-176	0.00294911
X18930_28	X7841_84	0.742993	4.40672e-151	-0.0388657
X23176_17	X7841_84	0.765113	1.90746e-165	0.0158498
X8407_84	X7841_84	0.724284	4.83891e-140	0.00962253
X8225_86	X7841_84	0.86161	9.87893e-254	0.00294911
X18930_28	X7832_181	0.753417	1.16382e-157	-0.0388657
X19787_14	X7832_181	0.711383	6.02641e-133	0.0158851
X23176_17	X7832_181	0.782999	2.83822e-178	0.0158498
X8407_84	X7832_181	0.770657	2.68682e-169	0.00962253
X25259_7	X7832_181	0.75865	4.34283e-161	0.00453564
X8225_86	X7832_181	0.80764	4.28808e-198	0.00294911
X18930_28	X7776_20	0.727479	7.32606e-142	-0.0388657
X23176_17	X7776_20	0.805931	1.25418e-196	0.0158498
X8407_84	X7776_20	0.74689	1.67131e-153	0.00962253
X25259_7	X7776_20	0.724536	3.48781e-140	0.00453564
X8225_86	X7776_20	0.855318	4.12073e-246	0.00294911
X10351_51	X7768_10	0.716212	1.48191e-135	0.00771988
X4859_6	X7768_10	0.756239	1.6909e-159	0.00603823
X25259_7	X7748_11	0.73071	9.9492e-144	0.00453564
X5694_57	X7745_3	0.705473	7.96537e-130	-0.0643914
X18930_28	X7745_3	0.749663	2.96995e-155	-0.0388657
X23176_17	X7745_3	0.747829	4.29182e-154	0.0158498
X25259_7	X7745_3	0.751312	2.63486e-156	0.00453564
X8225_86	X7745_3	0.763794	1.51681e-164	0.00294911
X18930_28	X7744_10	0.812114	5.29571e-202	-0.0388657
X13388_57	X7744_10	0.726815	1.75962e-141	0.0167377
X19787_14	X7744_10	0.720721	4.83711e-138	0.0158851
X23176_17	X7744_10	0.784846	1.1439e-179	0.0158498
X8407_84	X7744_10	0.730054	2.39421e-143	0.00962253
X25259_7	X7744_10	0.738738	1.73248e-148	0.00453564
X8225_86	X7744_10	0.864433	2.83721e-257	0.00294911
X5694_57	X7738_299	0.724277	4.8836e-140	-0.0643914
X18930_28	X7738_299	0.799074	6.8472e-191	-0.0388657
X13388_57	X7738_299	0.716043	1.83177e-135	0.0167377
X23176_17	X7738_299	0.800424	5.29715e-192	0.0158498
X8407_84	X7738_299	0.740078	2.674e-149	0.00962253
X25259_7	X7738_299	0.756404	1.31653e-159	0.00453564
X8225_86	X7738_299	0.838764	1.12436e-227	0.00294911
X10351_51	X7218_87	0.725579	8.91687e-141	0.00771988
X5694_57	X7211_2	0.702219	3.86239e-128	-0.0643914
X23176_17	X7211_2	0.784733	1.3942e-179	0.0158498
X8407_84	X7211_2	0.705726	5.87493e-130	0.00962253
X8225_86	X7211_2	0.834443	3.3205e-223	0.00294911
X18930_28	X7210_25	0.752169	7.43187e-157	-0.0388657
X13388_57	X7210_25	0.704596	2.27929e-129	0.0167377
X23176_17	X7210_25	0.704647	2.14315e-129	0.0158498
X25259_7	X7210_25	0.710321	2.2228e-132	0.00453564
X8225_86	X7210_25	0.775006	2.14841e-172	0.00294911
X25259_7	X7203_125	0.7275	7.1268e-142	0.00453564
X23176_17	X7198_197	0.722444	5.26776e-139	0.0158498
X8407_84	X7198_197	0.704467	2.65959e-129	0.00962253
X25259_7	X7198_197	0.736936	2.1008e-147	0.00453564
X8225_86	X7198_197	0.717046	5.18214e-136	0.00294911
X18930_28	X7195_119	0.718534	7.87611e-137	-0.0388657
X23176_17	X7195_119	0.795861	2.80162e-188	0.0158498
X8407_84	X7195_119	0.721792	1.22138e-138	0.00962253
X25259_7	X7195_119	0.729975	2.66101e-143	0.00453564
X8225_86	X7195_119	0.842311	1.91186e-231	0.00294911
X18930_28	X7194_36	0.851807	5.16232e-242	-0.0388657
X13388_57	X7194_36	0.70849	2.07902e-131	0.0167377
X19787_14	X7194_36	0.752791	2.95212e-157	0.0158851
X23176_17	X7194_36	0.78292	3.24898e-178	0.0158498
X8407_84	X7194_36	0.716936	5.95193e-136	0.00962253
X10351_51	X7194_36	0.700577	2.68078e-127	0.00771988
X25259_7	X7194_36	0.748602	1.39601e-154	0.00453564
X8225_86	X7194_36	0.849299	3.75489e-239	0.00294911
X18930_28	X7190_50	0.789217	5.05369e-183	-0.0388657
X13388_57	X7190_50	0.764968	2.39779e-165	0.0167377
X19787_14	X7190_50	0.713081	7.3894e-134	0.0158851
X23176_17	X7190_50	0.804134	4.20688e-195	0.0158498
X8407_84	X7190_50	0.735195	2.29256e-146	0.00962253
X25259_7	X7190_50	0.76041	2.91468e-162	0.00453564
X8225_86	X7190_50	0.881569	1.20478e-280	0.00294911
X18930_28	X7186_111	0.779548	1.05072e-175	-0.0388657
X23176_17	X7186_111	0.78029	2.97107e-176	0.0158498
X8407_84	X7186_111	0.715739	2.68351e-135	0.00962253
X25259_7	X7186_111	0.743936	1.15411e-151	0.00453564
X8225_86	X7186_111	0.817788	4.11418e-207	0.00294911
X18930_28	X7179_69	0.804038	5.06445e-195	-0.0388657
X19787_14	X7179_69	0.760092	4.76146e-162	0.0158851
X23176_17	X7179_69	0.725508	9.79291e-141	0.0158498
X10351_51	X7179_69	0.755272	7.25563e-159	0.00771988
X4859_6	X7179_69	0.70903	1.07744e-131	0.00603823
X25259_7	X7179_69	0.746256	4.17043e-153	0.00453564
X8225_86	X7179_69	0.790088	1.06111e-183	0.00294911
X18930_28	X7173_141	0.795189	9.7275e-188	-0.0388657
X19787_14	X7173_141	0.76086	1.45697e-162	0.0158851
X23176_17	X7173_141	0.748288	2.20382e-154	0.0158498
X8407_84	X7173_141	0.728991	9.8796e-143	0.00962253
X25259_7	X7173_141	0.763294	3.31744e-164	0.00453564
X8225_86	X7173_141	0.791719	5.57847e-185	0.00294911
X18930_28	X7167_102	0.702419	3.0459e-128	-0.0388657
X18930_28	X7152_5	0.756971	5.59038e-160	-0.0388657
X19787_14	X7152_5	0.747006	1.41202e-153	0.0158851
X23176_17	X7152_5	0.703755	6.22397e-129	0.0158498
X10351_51	X7152_5	0.707372	8.07102e-131	0.00771988
X25259_7	X7152_5	0.724091	6.22577e-140	0.00453564
X8225_86	X7152_5	0.723299	1.74093e-139	0.00294911
X18930_28	X7139_14	0.796735	5.52003e-189	-0.0388657
X19787_14	X7139_14	0.764295	6.9201e-165	0.0158851
X23176_17	X7139_14	0.799862	1.54065e-191	0.0158498
X8407_84	X7139_14	0.766831	1.25472e-166	0.00962253
X25259_7	X7139_14	0.801059	1.57602e-192	0.00453564
X8225_86	X7139_14	0.827687	1.81099e-216	0.00294911
X5694_57	X7110_2	0.705625	6.63747e-130	-0.0643914
X18930_28	X7110_2	0.774072	1.0072e-171	-0.0388657
X13388_57	X7110_2	0.702456	2.91695e-128	0.0167377
X19787_14	X7110_2	0.704262	3.39819e-129	0.0158851
X23176_17	X7110_2	0.820825	6.39122e-210	0.0158498
X8407_84	X7110_2	0.752014	9.33588e-157	0.00962253
X25259_7	X7110_2	0.778321	8.38015e-175	0.00453564
X8225_86	X7110_2	0.861464	1.49882e-253	0.00294911
X18930_28	X7108_7	0.794087	7.41015e-187	-0.0388657
X13388_57	X7108_7	0.731446	3.70232e-144	0.0167377
X19787_14	X7108_7	0.730931	7.39697e-144	0.0158851
X23176_17	X7108_7	0.778237	9.65157e-175	0.0158498
X8407_84	X7108_7	0.704057	4.34143e-129	0.00962253
X25259_7	X7108_7	0.772783	8.3905e-171	0.00453564
X8225_86	X7108_7	0.836881	1.03593e-225	0.00294911
X18930_28	X7090_17	0.777411	3.88034e-174	-0.0388657
X19787_14	X7090_17	0.775722	6.53189e-173	0.0158851
X23176_17	X7090_17	0.730909	7.62203e-144	0.0158498
X8407_84	X7090_17	0.715962	2.02988e-135	0.00962253
X10351_51	X7090_17	0.715674	2.91036e-135	0.00771988
X25259_7	X7090_17	0.788494	1.83697e-182	0.00453564
X8225_86	X7090_17	0.749605	3.23321e-155	0.00294911
X25259_7	X7071_23	0.763041	4.92724e-164	0.00453564
X18930_28	X7050_5	0.78593	1.71372e-180	-0.0388657
X19787_14	X7050_5	0.766275	3.03646e-166	0.0158851
X23176_17	X7050_5	0.734102	1.01851e-145	0.0158498
X8407_84	X7050_5	0.703594	7.53866e-129	0.00962253
X10351_51	X7050_5	0.733484	2.35984e-145	0.00771988
X25259_7	X7050_5	0.764915	2.60744e-165	0.00453564
X8225_86	X7050_5	0.803733	9.15625e-195	0.00294911
X18930_28	X7049_2	0.831737	1.80275e-220	-0.0388657
X13388_57	X7049_2	0.754055	4.49649e-158	0.0167377
X19787_14	X7049_2	0.732302	1.16893e-144	0.0158851
X23176_17	X7049_2	0.800777	2.70251e-192	0.0158498
X8407_84	X7049_2	0.722427	5.38097e-139	0.00962253
X25259_7	X7049_2	0.770021	7.53083e-169	0.00453564
X8225_86	X7049_2	0.868244	3.47939e-262	0.00294911
X10351_51	X7019_13	0.787237	1.71034e-181	0.00771988
X4859_6	X7019_13	0.723399	1.52944e-139	0.00603823
X18930_28	X6984_6	0.809532	9.8224e-200	-0.0388657
X19787_14	X6984_6	0.780822	1.19883e-176	0.0158851
X23176_17	X6984_6	0.734271	8.09428e-146	0.0158498
X10351_51	X6984_6	0.786537	5.88562e-181	0.00771988
X4859_6	X6984_6	0.717243	4.04061e-136	0.00603823
X25259_7	X6984_6	0.782173	1.17873e-177	0.00453564
X8225_86	X6984_6	0.761138	9.48404e-163	0.00294911
X18930_28	X6965_19	0.813745	1.87649e-203	-0.0388657
X10351_51	X6965_19	0.754949	1.1781e-158	0.00771988
X8225_86	X6965_19	0.75213	7.87159e-157	0.00294911
X18930_28	X6938_21	0.720328	7.99715e-138	-0.0388657
X23176_17	X6938_21	0.748466	1.70144e-154	0.0158498
X25259_7	X6938_21	0.709708	4.70517e-132	0.00453564
X8225_86	X6938_21	0.764066	9.91158e-165	0.00294911
X23176_17	X6927_7	0.737568	8.77661e-148	0.0158498
X25259_7	X6927_7	0.724709	2.78054e-140	0.00453564
X8225_86	X6927_7	0.750725	6.25381e-156	0.00294911
X18930_28	X6914_15	0.725698	7.63286e-141	-0.0388657
X23176_17	X6909_40	0.702939	1.64246e-128	0.0158498
X25259_7	X6909_40	0.769404	2.0394e-168	0.00453564
X18930_28	X6904_14	0.830258	5.36778e-219	-0.0388657
X13388_57	X6904_14	0.734975	3.0985e-146	0.0167377
X19787_14	X6904_14	0.732602	7.79448e-145	0.0158851
X23176_17	X6904_14	0.789912	1.45531e-183	0.0158498
X8407_84	X6904_14	0.722188	7.33033e-139	0.00962253
X25259_7	X6904_14	0.734237	8.47721e-146	0.00453564
X8225_86	X6904_14	0.869875	2.46621e-264	0.00294911
X18930_28	X6713_4	0.770943	1.69055e-169	-0.0388657
X19787_14	X6713_4	0.767716	3.06157e-167	0.0158851
X23176_17	X6713_4	0.74462	4.35297e-152	0.0158498
X10351_51	X6713_4	0.700622	2.54397e-127	0.00771988
X25259_7	X6713_4	0.808148	1.56212e-198	0.00453564
X8225_86	X6713_4	0.759425	1.32508e-161	0.00294911
X5694_57	X6641_60	0.70484	1.70118e-129	-0.0643914
X18930_28	X6641_60	0.79415	6.60349e-187	-0.0388657
X23176_17	X6641_60	0.76419	8.15015e-165	0.0158498
X8407_84	X6641_60	0.73264	7.40682e-145	0.00962253
X15474_7	X6641_60	0.744987	2.57641e-152	-0.00527846
X25259_7	X6641_60	0.716953	5.82496e-136	0.00453564
X8225_86	X6641_60	0.811579	1.57426e-201	0.00294911
X25259_7	X6626_81	0.709081	1.01168e-131	0.00453564
X10351_51	X6620_82	0.842239	2.28732e-231	0.00771988
X4859_6	X6620_82	0.7079	4.25546e-131	0.00603823
X18930_28	X6590_54	0.716925	6.0375e-136	-0.0388657
X23176_17	X6590_54	0.727389	8.24757e-142	0.0158498
X8407_84	X6590_54	0.716044	1.83052e-135	0.00962253
X8225_86	X6590_54	0.798198	3.57138e-190	0.00294911
X25259_7	X6586_19	0.721283	2.35159e-138	0.00453564
X18930_28	X6556_5	0.731585	3.07194e-144	-0.0388657
X8225_86	X6556_5	0.740592	1.30241e-149	0.00294911
X18930_28	X6521_35	0.724232	5.18134e-140	-0.0388657
X13388_57	X6521_35	0.7643	6.85776e-165	0.0167377
X23176_17	X6521_35	0.713749	3.22367e-134	0.0158498
X10351_51	X6521_35	0.750381	1.03671e-155	0.00771988
X25259_7	X6521_35	0.736126	6.3968e-147	0.00453564
X8225_86	X6521_35	0.77035	4.42141e-169	0.00294911
X10351_51	X6512_68	0.70643	2.51762e-130	0.00771988
X8225_86	X6511_17	0.729364	6.01025e-143	0.00294911
X18930_28	X6507_16	0.759189	1.90289e-161	-0.0388657
X19787_14	X6507_16	0.702833	1.86295e-128	0.0158851
X23176_17	X6507_16	0.763958	1.17393e-164	0.0158498
X8407_84	X6507_16	0.714325	1.57438e-134	0.00962253
X25259_7	X6507_16	0.71212	2.428e-133	0.00453564
X8225_86	X6507_16	0.834468	3.13102e-223	0.00294911
X18930_28	X6502_50	0.840451	1.86195e-229	-0.0388657
X19787_14	X6502_50	0.73513	2.50499e-146	0.0158851
X23176_17	X6502_50	0.712707	1.17583e-133	0.0158498
X25259_7	X6502_50	0.732436	9.75714e-145	0.00453564
X8225_86	X6502_50	0.739478	6.18437e-149	0.00294911
X18930_28	X6478_2	0.716576	9.37839e-136	-0.0388657
X19787_14	X6478_2	0.723556	1.24705e-139	0.0158851
X23176_17	X6478_2	0.736716	2.84508e-147	0.0158498
X8407_84	X6478_2	0.72247	5.09537e-139	0.00962253
X25259_7	X6478_2	0.738289	3.23424e-148	0.00453564
X8225_86	X6478_2	0.809556	9.36324e-200	0.00294911
X25259_7	X6455_52	0.728487	1.92788e-142	0.00453564
X18930_28	X6423_66	0.807724	3.63398e-198	-0.0388657
X13388_57	X6423_66	0.743211	3.23569e-151	0.0167377
X23176_17	X6423_66	0.754982	1.12188e-158	0.0158498
X25259_7	X6423_66	0.735937	8.29291e-147	0.00453564
X8225_86	X6423_66	0.816059	1.54972e-205	0.00294911
X18930_28	X6400_33	0.735403	1.72605e-146	-0.0388657
X18930_28	X6379_62	0.79843	2.30467e-190	-0.0388657
X19787_14	X6379_62	0.718722	6.20351e-137	0.0158851
X23176_17	X6379_62	0.780766	1.31947e-176	0.0158498
X8407_84	X6379_62	0.721497	1.78495e-138	0.00962253
X25259_7	X6379_62	0.780038	4.56759e-176	0.00453564
X8225_86	X6379_62	0.834624	2.16991e-223	0.00294911
X21206_218	X6378_2	0.744308	6.79456e-152	-0.0231585
X18930_28	X6375_75	0.761655	4.2587e-163	-0.0388657
X23176_17	X6375_75	0.77901	2.61312e-175	0.0158498
X8407_84	X6375_75	0.74079	9.85944e-150	0.00962253
X25259_7	X6375_75	0.835514	2.6645e-224	0.00453564
X8225_86	X6375_75	0.794098	7.26567e-187	0.00294911
X18930_28	X6369_82	0.730079	2.31382e-143	-0.0388657
X23176_17	X6369_82	0.72496	2.00447e-140	0.0158498
X25259_7	X6369_82	0.731394	3.97385e-144	0.00453564
X8225_86	X6369_82	0.749347	4.71461e-155	0.00294911
X23176_17	X6361_49	0.709457	6.39894e-132	0.0158498
X25259_7	X6361_49	0.741273	5.00606e-150	0.00453564
X8225_86	X6361_49	0.740927	8.13263e-150	0.00294911
X5694_57	X6321_65	0.701974	5.16309e-128	-0.0643914
X18930_28	X6321_65	0.722094	8.27347e-139	-0.0388657
X23176_17	X6321_65	0.744287	7.00033e-152	0.0158498
X25259_7	X6321_65	0.705317	9.6125e-130	0.00453564
X8225_86	X6321_65	0.761653	4.27065e-163	0.00294911
X18930_28	X6172_7	0.711702	4.06702e-133	-0.0388657
X8225_86	X6172_7	0.731734	2.51504e-144	0.00294911
X8225_86	X6086_15	0.717475	3.01462e-136	0.00294911
X13118_5	X6049_64	0.718588	7.35527e-137	-0.035346
X8225_86	X6049_64	0.734845	3.69762e-146	0.00294911
X18930_28	X5980_55	0.714499	1.26607e-134	-0.0388657
X8225_86	X5963_9	0.721744	1.29839e-138	0.00294911
X18930_28	X5939_42	0.797205	2.29349e-189	-0.0388657
X19787_14	X5939_42	0.73079	8.93352e-144	0.0158851
X23176_17	X5939_42	0.722201	7.2073e-139	0.0158498
X25259_7	X5939_42	0.715523	3.51709e-135	0.00453564
X8225_86	X5939_42	0.783812	6.92989e-179	0.00294911
X12387_7	X5885_55	0.747806	4.43793e-154	-0.0214538
X5694_57	X5864_10	0.763608	2.03217e-164	-0.0643914
X18930_28	X5864_10	0.770484	3.56164e-169	-0.0388657
X13118_5	X5864_10	0.796651	6.45982e-189	-0.035346
X8225_86	X5864_10	0.75947	1.23659e-161	0.00294911
X5694_57	X5858_6	0.728376	2.2351e-142	-0.0643914
X13118_5	X5858_6	0.731435	3.75857e-144	-0.035346
X16885_49	X5858_6	0.769048	3.61569e-168	-0.0158848
X15474_7	X5858_6	0.790355	6.55892e-184	-0.00527846
X25259_7	X5846_24	0.778652	4.79282e-175	0.00453564
X19787_14	X5837_49	0.718888	5.02389e-137	0.0158851
X18930_28	X5825_49	0.765133	1.84836e-165	-0.0388657
X19787_14	X5825_49	0.753205	1.59546e-157	0.0158851
X23176_17	X5825_49	0.76692	1.08912e-166	0.0158498
X8407_84	X5825_49	0.718637	6.91323e-137	0.00962253
X25259_7	X5825_49	0.716446	1.10363e-135	0.00453564
X8225_86	X5825_49	0.82776	1.53801e-216	0.00294911
X18930_28	X5759_10	0.801057	1.58379e-192	-0.0388657
X19787_14	X5759_10	0.7501	1.56582e-155	0.0158851
X10351_51	X5759_10	0.813915	1.3229e-203	0.00771988
X25259_7	X5759_10	0.713815	2.97224e-134	0.00453564
X8225_86	X5759_10	0.744412	5.85943e-152	0.00294911
X18930_28	X5740_17	0.738404	2.75652e-148	-0.0388657
X19787_14	X5740_17	0.731686	2.68058e-144	0.0158851
X23176_17	X5740_17	0.735512	1.48586e-146	0.0158498
X8407_84	X5740_17	0.721313	2.26335e-138	0.00962253
X25259_7	X5740_17	0.777538	3.13264e-174	0.00453564
X8225_86	X5740_17	0.764909	2.63142e-165	0.00294911
X18930_28	X5737_61	0.706114	3.68623e-130	-0.0388657
X19787_14	X5737_61	0.723809	8.98209e-140	0.0158851
X25259_7	X5737_61	0.726826	1.73257e-141	0.00453564
X8225_86	X5737_61	0.700488	2.97829e-127	0.00294911
X18930_28	X5735_54	0.752927	2.41412e-157	-0.0388657
X19787_14	X5735_54	0.702659	2.29127e-128	0.0158851
X23176_17	X5735_54	0.756448	1.23337e-159	0.0158498
X8407_84	X5735_54	0.709142	9.40015e-132	0.00962253
X25259_7	X5735_54	0.78219	1.14592e-177	0.00453564
X8225_86	X5735_54	0.79399	8.8565e-187	0.00294911
X18930_28	X5703_26	0.773952	1.22614e-171	-0.0388657
X8225_86	X5703_26	0.729577	4.52287e-143	0.00294911
X18930_28	X5694_57	0.758394	6.41996e-161	-0.0388657
X13118_5	X5694_57	0.948545	0	-0.035346
X15474_7	X5694_57	0.706669	1.88866e-130	-0.00527846
X18930_28	X5688_65	0.804975	8.15538e-196	-0.0388657
X13388_57	X5688_65	0.772716	9.37353e-171	0.0167377
X19787_14	X5688_65	0.711883	3.25326e-133	0.0158851
X23176_17	X5688_65	0.74291	4.95817e-151	0.0158498
X10351_51	X5688_65	0.723988	7.11586e-140	0.00771988
X25259_7	X5688_65	0.72505	1.78249e-140	0.00453564
X8225_86	X5688_65	0.81918	2.15688e-208	0.00294911
X18930_28	X5687_5	0.79472	2.31371e-187	-0.0388657
X19787_14	X5687_5	0.767485	4.42367e-167	0.0158851
X23176_17	X5687_5	0.814933	1.61259e-204	0.0158498
X8407_84	X5687_5	0.784391	2.52911e-179	0.00962253
X25259_7	X5687_5	0.812027	6.3274e-202	0.00453564
X8225_86	X5687_5	0.849072	6.78368e-239	0.00294911
X13118_5	X5682_13	0.713255	5.95873e-134	-0.035346
X8225_86	X5682_13	0.714094	2.09999e-134	0.00294911
X18930_28	X5654_70	0.763562	2.18225e-164	-0.0388657
X23176_17	X5654_70	0.79655	7.79422e-189	0.0158498
X8407_84	X5654_70	0.737538	9.15027e-148	0.00962253
X25259_7	X5654_70	0.779517	1.10755e-175	0.00453564
X8225_86	X5654_70	0.827933	1.04273e-216	0.00294911
X18930_28	X5650_9	0.763275	3.41897e-164	-0.0388657
X23176_17	X5650_9	0.781903	1.87628e-177	0.0158498
X8407_84	X5650_9	0.768933	4.35196e-168	0.00962253
X25259_7	X5650_9	0.760132	4.4743e-162	0.00453564
X8225_86	X5650_9	0.801797	3.83707e-193	0.00294911
X18930_28	X5637_81	0.776885	9.36287e-174	-0.0388657
X19787_14	X5637_81	0.747997	3.36391e-154	0.0158851
X10351_51	X5637_81	0.829439	3.46499e-218	0.00771988
X4859_6	X5637_81	0.737217	1.42561e-147	0.00603823
X25259_7	X5637_81	0.727693	5.52063e-142	0.00453564
X8225_86	X5637_81	0.723632	1.13017e-139	0.00294911
X18930_28	X5628_21	0.73174	2.49302e-144	-0.0388657
X8225_86	X5628_21	0.748338	2.04996e-154	0.00294911
X18930_28	X5609_92	0.760869	1.43679e-162	-0.0388657
X23176_17	X5609_92	0.781721	2.56876e-177	0.0158498
X8407_84	X5609_92	0.737194	1.47059e-147	0.00962253
X25259_7	X5609_92	0.783101	2.37765e-178	0.00453564
X8225_86	X5609_92	0.806802	2.25484e-197	0.00294911
X18930_28	X5586_66	0.705602	6.82343e-130	-0.0388657
X25259_7	X5586_66	0.727759	5.057e-142	0.00453564
X8225_86	X5586_66	0.709773	4.34768e-132	0.00294911
X8225_86	X5542_22	0.765398	1.21727e-165	0.00294911
X18930_28	X5496_49	0.774699	3.56909e-172	-0.0388657
X8225_86	X5496_49	0.728354	2.29978e-142	0.00294911
X18930_28	X5483_1	0.77864	4.89093e-175	-0.0388657
X23176_17	X5483_1	0.725569	9.03348e-141	0.0158498
X25259_7	X5483_1	0.722139	7.81117e-139	0.00453564
X8225_86	X5483_1	0.805819	1.56305e-196	0.00294911
X5694_57	X5476_66	0.764992	2.31104e-165	-0.0643914
X18930_28	X5476_66	0.848985	8.49984e-239	-0.0388657
X23176_17	X5476_66	0.7243	4.74298e-140	0.0158498
X15474_7	X5476_66	0.732901	5.19762e-145	-0.00527846
X8225_86	X5476_66	0.82024	2.24258e-209	0.00294911
X18930_28	X5475_10	0.763265	3.47519e-164	-0.0388657
X8225_86	X5475_10	0.7331	3.97045e-145	0.00294911
X18930_28	X5467_15	0.70533	9.46e-130	-0.0388657
X12387_7	X5467_15	0.731896	2.02149e-144	-0.0214538
X16885_49	X5467_15	0.768273	1.25522e-167	-0.0158848
X15474_7	X5467_15	0.747394	8.06069e-154	-0.00527846
X18930_28	X5465_32	0.73172	2.56151e-144	-0.0388657
X25259_7	X5465_32	0.786923	2.97964e-181	0.00453564
X5694_57	X5464_52	0.704228	3.5382e-129	-0.0643914
X18930_28	X5464_52	0.790096	1.04512e-183	-0.0388657
X13388_57	X5464_52	0.738071	4.37265e-148	0.0167377
[truncated: 1,972 more rows]

## Sheet: Table_3
Enterez	Rectome Pathway	Reactome Pathway Id	LogP	Log q-value (FDR adjusted pvalue)	Pathway Enriched Proteins	Pathway Background Proteins	Pathway Enrichment Fold Change	Model Weight	Age Correlation-Non-amyloidosis
[truncated: 185 more rows]
